# Supplementary material
Source: publisher site journal article supplement (https://www.spandidos-publications.com/6484/downloadSupplementary)
Supplement: Supplementary file 1 [file downloadSupplementary]

## Sheet: topblast
Table SV.Gene Ontology analysis
Sequence Name	Sequence Desc	Sequence Length	Top Hit Desc	Hit Acc	E-Value	Similarity	Bit-Score	Alignment	Positive
P02795	MT2_HUMANMetallothionein-2 OS=Homo sapiens OX=9606 GN=MT2A PE=1 SV=1	61	sp|P02795|MT2_HUMANMetallothionein-2 OS=Homo sapiens OX=9606 GN=MT2A PE=1 SV=1	P02795	6.1e-31	100%	105.145	61	61
P52926	HMGA2_HUMANHigh mobility group HMGI-C OS=Homo sapiens OX=9606 GN=HMGA2 PE=1 SV=1	109	sp|P52926|HMGA2_HUMANHigh mobility group protein HMGI-C OS=Homo sapiens OX=9606 GN=HMGA2 PE=1 SV=1	P52926	2.1e-66	100%	199.134	109	109
P05121	PAI1_HUMANPlasminogen activator inhibitor 1 OS=Homo sapiens OX=9606 GN=SERPINE1 PE=1 SV=1	402	sp|P05121|PAI1_HUMANPlasminogen activator inhibitor 1 OS=Homo sapiens OX=9606 GN=SERPINE1 PE=1 SV=1	P05121	0	100%	834.328	402	402
O15075	DCLK1_HUMANSerine threonine- kinase DCLK1 OS=Homo sapiens OX=9606 GN=DCLK1 PE=1 SV=2	740	sp|O15075|DCLK1_HUMANSerine/threonine-protein kinase DCLK1 OS=Homo sapiens OX=9606 GN=DCLK1 PE=1 SV=2	O15075	0	100%	1528.46	740	740
P04732	MT1E_HUMANMetallothionein-1E OS=Homo sapiens OX=9606 GN=MT1E PE=1 SV=1	61	sp|P04732|MT1E_HUMANMetallothionein-1E OS=Homo sapiens OX=9606 GN=MT1E PE=1 SV=1	P04732	1.1e-30	100%	104.375	61	61
Q01628	IFM3_HUMANInterferon-induced transmembrane 3 OS=Homo sapiens OX=9606 GN=IFITM3 PE=1 SV=2	133	sp|Q01628|IFM3_HUMANInterferon-induced transmembrane protein 3 OS=Homo sapiens OX=9606 GN=IFITM3 PE=1 SV=2	Q01628	1e-96	100%	278.1	133	133
P52566	GDIR2_HUMANRho GDP-dissociation inhibitor 2 OS=Homo sapiens OX=9606 GN=ARHGDIB PE=1 SV=3	201	sp|P52566|GDIR2_HUMANRho GDP-dissociation inhibitor 2 OS=Homo sapiens OX=9606 GN=ARHGDIB PE=1 SV=3	P52566	5.2e-147	100%	410.994	201	201
Q8IVF2	AHNK2_HUMAN AHNAK2 OS=Homo sapiens OX=9606 GN=AHNAK2 PE=1 SV=2	5795	sp|Q8IVF2|AHNK2_HUMANProtein AHNAK2 OS=Homo sapiens OX=9606 GN=AHNAK2 PE=1 SV=2	Q8IVF2	0	100%	11299.8	5795	5795
Q9BXT2	CCG6_HUMANVoltage-dependent calcium channel gamma-6 subunit OS=Homo sapiens OX=9606 GN=CACNG6 PE=1 SV=1	260	sp|Q9BXT2|CCG6_HUMANVoltage-dependent calcium channel gamma-6 subunit OS=Homo sapiens OX=9606 GN=CACNG6 PE=1 SV=1	Q9BXT2	0	100%	522.316	260	260
O75326	SEM7A_HUMANSemaphorin-7A OS=Homo sapiens OX=9606 GN=SEMA7A PE=1 SV=1	666	sp|O75326|SEM7A_HUMANSemaphorin-7A OS=Homo sapiens OX=9606 GN=SEMA7A PE=1 SV=1	O75326	0	100%	1391.71	666	666
Q9NS25	SPNXB_HUMANSperm associated with the nucleus on the X chromosome B1 OS=Homo sapiens OX=9606 GN=SPANXB1 PE=1 SV=2	103	sp|Q9NS25|SPNXB_HUMANSperm protein associated with the nucleus on the X chromosome B1 OS=Homo sapiens OX=9606 GN=SPANXB1 PE=1 SV=2	Q9NS25	2.4e-70	100%	208.764	103	103
Q9Y653	AGRG1_HUMANAdhesion G- coupled receptor G1 OS=Homo sapiens OX=9606 GN=ADGRG1 PE=1 SV=2	693	sp|Q9Y653|AGRG1_HUMANAdhesion G-protein coupled receptor G1 OS=Homo sapiens OX=9606 GN=ADGRG1 PE=1 SV=2	Q9Y653	0	100%	1420.6	693	693
Q96K17	BT3L4_HUMANTranscription factor BTF3 homolog 4 OS=Homo sapiens OX=9606 GN=BTF3L4 PE=1 SV=1	158	sp|Q96K17|BT3L4_HUMANTranscription factor BTF3 homolog 4 OS=Homo sapiens OX=9606 GN=BTF3L4 PE=1 SV=1	Q96K17	3.9e-112	100%	318.931	158	158
P02679	FIBG_HUMANFibrinogen gamma chain OS=Homo sapiens OX=9606 GN=FGG PE=1 SV=3	453	sp|P02679|FIBG_HUMANFibrinogen gamma chain OS=Homo sapiens OX=9606 GN=FGG PE=1 SV=3	P02679	0	100%	954.125	453	453
Q14697	GANAB_HUMANNeutral alpha-glucosidase AB OS=Homo sapiens OX=9606 GN=GANAB PE=1 SV=3	944	sp|Q14697|GANAB_HUMANNeutral alpha-glucosidase AB OS=Homo sapiens OX=9606 GN=GANAB PE=1 SV=3	Q14697	0	100%	1949.48	944	944
P46821	MAP1B_HUMANMicrotubule-associated 1B OS=Homo sapiens OX=9606 GN=MAP1B PE=1 SV=2	2468	sp|P46821|MAP1B_HUMANMicrotubule-associated protein 1B OS=Homo sapiens OX=9606 GN=MAP1B PE=1 SV=2	P46821	0	100%	4971.37	2468	2468
Q14061	COX17_HUMANCytochrome c oxidase copper chaperone OS=Homo sapiens OX=9606 GN=COX17 PE=1 SV=2	63	sp|Q14061|COX17_HUMANCytochrome c oxidase copper chaperone OS=Homo sapiens OX=9606 GN=COX17 PE=1 SV=2	Q14061	9.3e-40	100%	127.872	63	63
P27701	CD82_HUMANCD82 antigen OS=Homo sapiens OX=9606 GN=CD82 PE=1 SV=1	267	sp|P27701|CD82_HUMANCD82 antigen OS=Homo sapiens OX=9606 GN=CD82 PE=1 SV=1	P27701	0	100%	548.895	267	267
P21926	CD9_HUMANCD9 antigen OS=Homo sapiens OX=9606 GN=CD9 PE=1 SV=4	228	sp|P21926|CD9_HUMANCD9 antigen OS=Homo sapiens OX=9606 GN=CD9 PE=1 SV=4	P21926	7.5e-168	100%	466.077	228	228
P02751	FINC_HUMANFibronectin OS=Homo sapiens OX=9606 GN=FN1 PE=1 SV=5	2477	sp|P02751|FINC_HUMANFibronectin OS=Homo sapiens OX=9606 GN=FN1 PE=1 SV=5	P02751	0	100%	5094.64	2477	2477
Q96S97	MYADM_HUMANMyeloid-associated differentiation marker OS=Homo sapiens OX=9606 GN=MYADM PE=1 SV=2	322	sp|Q96S97|MYADM_HUMANMyeloid-associated differentiation marker OS=Homo sapiens OX=9606 GN=MYADM PE=1 SV=2	Q96S97	0	100%	649.818	322	322
Q14533	type II cuticular Hb1 OS=Homo sapiens OX=9606 GN=KRT81 PE=1 SV=3	505	sp|Q14533|KRT81_HUMANKeratin, type II cuticular Hb1 OS=Homo sapiens OX=9606 GN=KRT81 PE=1 SV=3	Q14533	0	100%	1019.99	505	505
O14495	PLPP3_HUMANPhospholipid phosphatase 3 OS=Homo sapiens OX=9606 GN=PLPP3 PE=1 SV=1	311	sp|O14495|PLPP3_HUMANPhospholipid phosphatase 3 OS=Homo sapiens OX=9606 GN=PLPP3 PE=1 SV=1	O14495	0	100%	647.121	311	311
P04179	SODM_HUMANSuperoxide dismutase	222	sp|P04179|SODM_HUMANSuperoxide dismutase [Mn], mitochondrial OS=Homo sapiens OX=9606 GN=SOD2 PE=1 SV=3	P04179	5.3e-167	100%	463.381	222	222
O95832	CLD1_HUMANClaudin-1 OS=Homo sapiens OX=9606 GN=CLDN1 PE=1 SV=1	211	sp|O95832|CLD1_HUMANClaudin-1 OS=Homo sapiens OX=9606 GN=CLDN1 PE=1 SV=1	O95832	1.8e-154	100%	430.639	211	211
P30530	UFO_HUMANTyrosine- kinase receptor UFO OS=Homo sapiens OX=9606 GN=AXL PE=1 SV=4	894	sp|P30530|UFO_HUMANTyrosine-protein kinase receptor UFO OS=Homo sapiens OX=9606 GN=AXL PE=1 SV=4	P30530	0	100%	1839.7	894	894
Q13885	TBB2A_HUMANTubulin beta-2A chain OS=Homo sapiens OX=9606 GN=TUBB2A PE=1 SV=1	445	sp|Q13885|TBB2A_HUMANTubulin beta-2A chain OS=Homo sapiens OX=9606 GN=TUBB2A PE=1 SV=1	Q13885	0	100%	936.791	445	445
Q99942	RNF5_HUMANE3 ubiquitin- ligase RNF5 OS=Homo sapiens OX=9606 GN=RNF5 PE=1 SV=1	180	sp|Q99942|RNF5_HUMANE3 ubiquitin-protein ligase RNF5 OS=Homo sapiens OX=9606 GN=RNF5 PE=1 SV=1	Q99942	4.9e-130	100%	366.311	180	180
Q96HE7	ERO1A_HUMANERO1 alpha OS=Homo sapiens OX=9606 GN=ERO1A PE=1 SV=2	468	sp|Q96HE7|ERO1A_HUMANERO1-like protein alpha OS=Homo sapiens OX=9606 GN=ERO1A PE=1 SV=2	Q96HE7	0	100%	970.689	468	468
Q9NXK6	PAQR5_HUMANMembrane progestin receptor gamma OS=Homo sapiens OX=9606 GN=PAQR5 PE=1 SV=2	330	sp|Q9NXK6|PAQR5_HUMANMembrane progestin receptor gamma OS=Homo sapiens OX=9606 GN=PAQR5 PE=1 SV=2	Q9NXK6	0	100%	682.174	330	330
P11234	RALB_HUMANRas-related Ral-B OS=Homo sapiens OX=9606 GN=RALB PE=1 SV=1	206	sp|P11234|RALB_HUMANRas-related protein Ral-B OS=Homo sapiens OX=9606 GN=RALB PE=1 SV=1	P11234	2.5e-151	100%	422.55	206	206
P01584	IL1B_HUMANInterleukin-1 beta OS=Homo sapiens OX=9606 GN=IL1B PE=1 SV=2	269	sp|P01584|IL1B_HUMANInterleukin-1 beta OS=Homo sapiens OX=9606 GN=IL1B PE=1 SV=2	P01584	0	100%	560.451	269	269
Q9C002	NMES1_HUMANNormal mucosa of esophagus-specific gene 1 OS=Homo sapiens OX=9606 GN=NMES1 PE=2 SV=1	83	sp|Q9C002|NMES1_HUMANNormal mucosa of esophagus-specific gene 1 protein OS=Homo sapiens OX=9606 GN=NMES1 PE=2 SV=1	Q9C002	1.4e-55	100%	169.474	83	83
Q8NDC0	MISSL_HUMANMAPK-interacting and spindle-stabilizing -like OS=Homo sapiens OX=9606 GN=MAPK1IP1L PE=1 SV=4	245	sp|Q8NDC0|MISSL_HUMANMAPK-interacting and spindle-stabilizing protein-like OS=Homo sapiens OX=9606 GN=MAPK1IP1L PE=1 SV=4	Q8NDC0	6.6e-151	100%	424.476	245	245
P23921	RIR1_HUMANRibonucleoside-diphosphate reductase large subunit OS=Homo sapiens OX=9606 GN=RRM1 PE=1 SV=1	792	sp|P23921|RIR1_HUMANRibonucleoside-diphosphate reductase large subunit OS=Homo sapiens OX=9606 GN=RRM1 PE=1 SV=1	P23921	0	100%	1660.58	792	792
Q6P9B6	MEAK7_HUMANMTOR-associated MEAK7 OS=Homo sapiens OX=9606 GN=MEAK7 PE=1 SV=2	456	sp|Q6P9B6|MEAK7_HUMANMTOR-associated protein MEAK7 OS=Homo sapiens OX=9606 GN=MEAK7 PE=1 SV=2	Q6P9B6	0	100%	952.199	456	456
Q9BXN6	SPNXD_HUMANSperm associated with the nucleus on the X chromosome D OS=Homo sapiens OX=9606 GN=SPANXD PE=1 SV=1	97	sp|Q9BXN6|SPNXD_HUMANSperm protein associated with the nucleus on the X chromosome D OS=Homo sapiens OX=9606 GN=SPANXD PE=1 SV=1	Q9BXN6	4e-67	100%	199.904	97	97
Q6JBY9	CPZIP_HUMAN -interacting OS=Homo sapiens OX=9606 GN=RCSD1 PE=1 SV=1	416	sp|Q6JBY9|CPZIP_HUMANCapZ-interacting protein OS=Homo sapiens OX=9606 GN=RCSD1 PE=1 SV=1	Q6JBY9	0	100%	813.527	416	416
Q01432	AMPD3_HUMANAMP deaminase 3 OS=Homo sapiens OX=9606 GN=AMPD3 PE=1 SV=1	767	sp|Q01432|AMPD3_HUMANAMP deaminase 3 OS=Homo sapiens OX=9606 GN=AMPD3 PE=1 SV=1	Q01432	0	100%	1603.19	767	767
P28288	ABCD3_HUMANATP-binding cassette sub-family D member 3 OS=Homo sapiens OX=9606 GN=ABCD3 PE=1 SV=1	659	sp|P28288|ABCD3_HUMANATP-binding cassette sub-family D member 3 OS=Homo sapiens OX=9606 GN=ABCD3 PE=1 SV=1	P28288	0	100%	1363.21	659	659
O75976	CBPD_HUMANCarboxypeptidase D OS=Homo sapiens OX=9606 GN=CPD PE=1 SV=2	1380	sp|O75976|CBPD_HUMANCarboxypeptidase D OS=Homo sapiens OX=9606 GN=CPD PE=1 SV=2	O75976	0	100%	2878.58	1380	1380
P07858	CATB_HUMANCathepsin B OS=Homo sapiens OX=9606 GN=CTSB PE=1 SV=3	339	sp|P07858|CATB_HUMANCathepsin B OS=Homo sapiens OX=9606 GN=CTSB PE=1 SV=3	P07858	0	100%	710.294	339	339
Q9Y5U9	IR3IP_HUMANImmediate early response 3-interacting 1 OS=Homo sapiens OX=9606 GN=IER3IP1 PE=1 SV=1	82	sp|Q9Y5U9|IR3IP_HUMANImmediate early response 3-interacting protein 1 OS=Homo sapiens OX=9606 GN=IER3IP1 PE=1 SV=1	Q9Y5U9	1.3e-53	100%	164.466	82	82
Q9Y673	ALG5_HUMANDolichyl-phosphate beta-glucosyltransferase OS=Homo sapiens OX=9606 GN=ALG5 PE=1 SV=1	324	sp|Q9Y673|ALG5_HUMANDolichyl-phosphate beta-glucosyltransferase OS=Homo sapiens OX=9606 GN=ALG5 PE=1 SV=1	Q9Y673	0	100%	672.159	324	324
Q07954	LRP1_HUMANProlow-density lipo receptor-related 1 OS=Homo sapiens OX=9606 GN=LRP1 PE=1 SV=2	4544	sp|Q07954|LRP1_HUMANProlow-density lipoprotein receptor-related protein 1 OS=Homo sapiens OX=9606 GN=LRP1 PE=1 SV=2	Q07954	0	100%	9399.63	4544	4544
Q6PI78	TMM65_HUMANTransmembrane 65 OS=Homo sapiens OX=9606 GN=TMEM65 PE=1 SV=2	240	sp|Q6PI78|TMM65_HUMANTransmembrane protein 65 OS=Homo sapiens OX=9606 GN=TMEM65 PE=1 SV=2	Q6PI78	7e-174	100%	482.256	240	240
P80297	MT1X_HUMANMetallothionein-1X OS=Homo sapiens OX=9606 GN=MT1X PE=1 SV=1	61	sp|P80297|MT1X_HUMANMetallothionein-1X OS=Homo sapiens OX=9606 GN=MT1X PE=1 SV=1	P80297	4.3e-31	100%	105.531	61	61
O60711	LPXN_HUMANLeupaxin OS=Homo sapiens OX=9606 GN=LPXN PE=1 SV=1	386	sp|O60711|LPXN_HUMANLeupaxin OS=Homo sapiens OX=9606 GN=LPXN PE=1 SV=1	O60711	0	100%	804.668	386	386
Q9UI42	CBPA4_HUMANCarboxypeptidase A4 OS=Homo sapiens OX=9606 GN=CPA4 PE=1 SV=2	421	sp|Q9UI42|CBPA4_HUMANCarboxypeptidase A4 OS=Homo sapiens OX=9606 GN=CPA4 PE=1 SV=2	Q9UI42	0	100%	880.937	421	421
Q14116	IL18_HUMANInterleukin-18 OS=Homo sapiens OX=9606 GN=IL18 PE=1 SV=1	193	sp|Q14116|IL18_HUMANInterleukin-18 OS=Homo sapiens OX=9606 GN=IL18 PE=1 SV=1	Q14116	1.1e-140	100%	394.43	193	193
Q6PCE3	PGM2L_HUMANGlucose 1,6-bisphosphate synthase OS=Homo sapiens OX=9606 GN=PGM2L1 PE=1 SV=3	622	sp|Q6PCE3|PGM2L_HUMANGlucose 1,6-bisphosphate synthase OS=Homo sapiens OX=9606 GN=PGM2L1 PE=1 SV=3	Q6PCE3	0	100%	1301.19	622	622
Q6UXH1	CREL2_HUMAN disulfide isomerase CRELD2 OS=Homo sapiens OX=9606 GN=CRELD2 PE=1 SV=1	353	sp|Q6UXH1|CREL2_HUMANProtein disulfide isomerase CRELD2 OS=Homo sapiens OX=9606 GN=CRELD2 PE=1 SV=1	Q6UXH1	0	100%	716.072	353	353
P09382	LEG1_HUMANGalectin-1 OS=Homo sapiens OX=9606 GN=LGALS1 PE=1 SV=2	135	sp|P09382|LEG1_HUMANGalectin-1 OS=Homo sapiens OX=9606 GN=LGALS1 PE=1 SV=2	P09382	2.3e-97	100%	279.641	135	135
O15321	TM9S1_HUMANTransmembrane 9 superfamily member 1 OS=Homo sapiens OX=9606 GN=TM9SF1 PE=2 SV=2	606	sp|O15321|TM9S1_HUMANTransmembrane 9 superfamily member 1 OS=Homo sapiens OX=9606 GN=TM9SF1 PE=2 SV=2	O15321	0	100%	1242.64	606	606
P17301	ITA2_HUMANIntegrin alpha-2 OS=Homo sapiens OX=9606 GN=ITGA2 PE=1 SV=1	1181	sp|P17301|ITA2_HUMANIntegrin alpha-2 OS=Homo sapiens OX=9606 GN=ITGA2 PE=1 SV=1	P17301	0	100%	2446.39	1181	1181
O95810	CAVN2_HUMANCaveolae-associated 2 OS=Homo sapiens OX=9606 GN=CAVIN2 PE=1 SV=3	425	sp|O95810|CAVN2_HUMANCaveolae-associated protein 2 OS=Homo sapiens OX=9606 GN=CAVIN2 PE=1 SV=3	O95810	0	100%	857.825	425	425
Q5SZL2	CE85L_HUMANCentrosomal of 85 kDa-like OS=Homo sapiens OX=9606 GN=CEP85L PE=1 SV=1	805	sp|Q5SZL2|CE85L_HUMANCentrosomal protein of 85 kDa-like OS=Homo sapiens OX=9606 GN=CEP85L PE=1 SV=1	Q5SZL2	0	100%	1652.11	805	805
P48060	GLIP1_HUMANGlioma pathogenesis-related 1 OS=Homo sapiens OX=9606 GN=GLIPR1 PE=1 SV=3	266	sp|P48060|GLIP1_HUMANGlioma pathogenesis-related protein 1 OS=Homo sapiens OX=9606 GN=GLIPR1 PE=1 SV=3	P48060	0	100%	556.214	266	266
P63313	TYB10_HUMANThymosin beta-10 OS=Homo sapiens OX=9606 GN=TMSB10 PE=1 SV=2	44	sp|P63313|TYB10_HUMANThymosin beta-10 OS=Homo sapiens OX=9606 GN=TMSB10 PE=1 SV=2	P63313	2.1e-24	100%	87.0409	44	44
Q9UKV8	AGO2_HUMAN argonaute-2 OS=Homo sapiens OX=9606 GN=AGO2 PE=1 SV=3	859	sp|Q9UKV8|AGO2_HUMANProtein argonaute-2 OS=Homo sapiens OX=9606 GN=AGO2 PE=1 SV=3	Q9UKV8	0	100%	1795.02	859	859
Q4G0X4	KCD21_HUMANBTB POZ domain-containing KCTD21 OS=Homo sapiens OX=9606 GN=KCTD21 PE=1 SV=1	260	sp|Q4G0X4|KCD21_HUMANBTB/POZ domain-containing protein KCTD21 OS=Homo sapiens OX=9606 GN=KCTD21 PE=1 SV=1	Q4G0X4	0	100%	541.576	260	260
Q9UM22	EPDR1_HUMANMammalian ependymin-related 1 OS=Homo sapiens OX=9606 GN=EPDR1 PE=1 SV=2	224	sp|Q9UM22|EPDR1_HUMANMammalian ependymin-related protein 1 OS=Homo sapiens OX=9606 GN=EPDR1 PE=1 SV=2	Q9UM22	1.4e-166	100%	462.611	224	224
O43493	TGON2_HUMANTrans-Golgi network integral membrane 2 OS=Homo sapiens OX=9606 GN=TGOLN2 PE=1 SV=4	437	sp|O43493|TGON2_HUMANTrans-Golgi network integral membrane protein 2 OS=Homo sapiens OX=9606 GN=TGOLN2 PE=1 SV=4	O43493	0	100%	859.366	437	437
Q5JS37	NHLC3_HUMANNHL repeat-containing 3 OS=Homo sapiens OX=9606 GN=NHLRC3 PE=2 SV=1	347	sp|Q5JS37|NHLC3_HUMANNHL repeat-containing protein 3 OS=Homo sapiens OX=9606 GN=NHLRC3 PE=2 SV=1	Q5JS37	0	100%	713.761	347	347
P15509	CSF2R_HUMANGranulocyte-macrophage colony-stimulating factor receptor subunit alpha OS=Homo sapiens OX=9606 GN=CSF2RA PE=1 SV=1	400	sp|P15509|CSF2R_HUMANGranulocyte-macrophage colony-stimulating factor receptor subunit alpha OS=Homo sapiens OX=9606 GN=CSF2RA PE=1 SV=1	P15509	0	100%	832.017	400	400
Q2TB90	HKDC1_HUMANHexokinase HKDC1 OS=Homo sapiens OX=9606 GN=HKDC1 PE=1 SV=3	917	sp|Q2TB90|HKDC1_HUMANHexokinase HKDC1 OS=Homo sapiens OX=9606 GN=HKDC1 PE=1 SV=3	Q2TB90	0	100%	1885.54	917	917
P49662	CASP4_HUMANCaspase-4 OS=Homo sapiens OX=9606 GN=CASP4 PE=1 SV=1	377	sp|P49662|CASP4_HUMANCaspase-4 OS=Homo sapiens OX=9606 GN=CASP4 PE=1 SV=1	P49662	0	100%	791.956	377	377
O14832	PAHX_HUMANPhytanoyl- peroxisomal OS=Homo sapiens OX=9606 GN=PHYH PE=1 SV=1	338	sp|O14832|PAHX_HUMANPhytanoyl-CoA dioxygenase, peroxisomal OS=Homo sapiens OX=9606 GN=PHYH PE=1 SV=1	O14832	0	100%	712.605	338	338
P00749	UROK_HUMANUrokinase-type plasminogen activator OS=Homo sapiens OX=9606 GN=PLAU PE=1 SV=2	431	sp|P00749|UROK_HUMANUrokinase-type plasminogen activator OS=Homo sapiens OX=9606 GN=PLAU PE=1 SV=2	P00749	0	100%	905.205	431	431
P20908	CO5A1_HUMANCollagen alpha-1(V) chain OS=Homo sapiens OX=9606 GN=COL5A1 PE=1 SV=3	1838	sp|P20908|CO5A1_HUMANCollagen alpha-1(V) chain OS=Homo sapiens OX=9606 GN=COL5A1 PE=1 SV=3	P20908	0	100%	3403.61	1838	1838
Q14764	MVP_HUMANMajor vault OS=Homo sapiens OX=9606 GN=MVP PE=1 SV=4	893	sp|Q14764|MVP_HUMANMajor vault protein OS=Homo sapiens OX=9606 GN=MVP PE=1 SV=4	Q14764	0	100%	1811.19	893	893
P43121	MUC18_HUMANCell surface glyco MUC18 OS=Homo sapiens OX=9606 GN=MCAM PE=1 SV=2	646	sp|P43121|MUC18_HUMANCell surface glycoprotein MUC18 OS=Homo sapiens OX=9606 GN=MCAM PE=1 SV=2	P43121	0	100%	1319.29	646	646
P52823	STC1_HUMANStanniocalcin-1 OS=Homo sapiens OX=9606 GN=STC1 PE=1 SV=1	247	sp|P52823|STC1_HUMANStanniocalcin-1 OS=Homo sapiens OX=9606 GN=STC1 PE=1 SV=1	P52823	0	100%	512.301	247	247
O95833	CLIC3_HUMANChloride intracellular channel 3 OS=Homo sapiens OX=9606 GN=CLIC3 PE=1 SV=2	236	sp|O95833|CLIC3_HUMANChloride intracellular channel protein 3 OS=Homo sapiens OX=9606 GN=CLIC3 PE=1 SV=2	O95833	2.7e-173	100%	480.715	236	236
Q9NUD5	ZCHC3_HUMANZinc finger CCHC domain-containing 3 OS=Homo sapiens OX=9606 GN=ZCCHC3 PE=1 SV=2	403	sp|Q9NUD5|ZCHC3_HUMANZinc finger CCHC domain-containing protein 3 OS=Homo sapiens OX=9606 GN=ZCCHC3 PE=1 SV=2	Q9NUD5	0	100%	811.216	403	403
O95873	CF047_HUMANUncharacterized protein C6orf47 OS=Homo sapiens OX=9606 GN=C6orf47 PE=1 SV=2	294	sp|O95873|CF047_HUMANUncharacterized protein C6orf47 OS=Homo sapiens OX=9606 GN=C6orf47 PE=1 SV=2	O95873	0	100%	571.237	294	294
Q13751	LAMB3_HUMANLaminin subunit beta-3 OS=Homo sapiens OX=9606 GN=LAMB3 PE=1 SV=1	1172	sp|Q13751|LAMB3_HUMANLaminin subunit beta-3 OS=Homo sapiens OX=9606 GN=LAMB3 PE=1 SV=1	Q13751	0	100%	2409.02	1172	1172
Q7Z7K0	COXM1_HUMANCOX assembly mitochondrial homolog OS=Homo sapiens OX=9606 GN=CMC1 PE=1 SV=1	106	sp|Q7Z7K0|COXM1_HUMANCOX assembly mitochondrial protein homolog OS=Homo sapiens OX=9606 GN=CMC1 PE=1 SV=1	Q7Z7K0	2.1e-74	100%	219.164	106	106
Q9BWH2	FUND2_HUMANFUN14 domain-containing 2 OS=Homo sapiens OX=9606 GN=FUNDC2 PE=1 SV=2	189	sp|Q9BWH2|FUND2_HUMANFUN14 domain-containing protein 2 OS=Homo sapiens OX=9606 GN=FUNDC2 PE=1 SV=2	Q9BWH2	5.7e-138	100%	387.111	189	189
P05362	ICAM1_HUMANIntercellular adhesion molecule 1 OS=Homo sapiens OX=9606 GN=ICAM1 PE=1 SV=2	532	sp|P05362|ICAM1_HUMANIntercellular adhesion molecule 1 OS=Homo sapiens OX=9606 GN=ICAM1 PE=1 SV=2	P05362	0	100%	1079.32	532	532
Q92805	GOGA1_HUMANGolgin subfamily A member 1 OS=Homo sapiens OX=9606 GN=GOLGA1 PE=1 SV=3	767	sp|Q92805|GOGA1_HUMANGolgin subfamily A member 1 OS=Homo sapiens OX=9606 GN=GOLGA1 PE=1 SV=3	Q92805	0	100%	1526.92	767	767
P08183	MDR1_HUMANATP-dependent translocase ABCB1 OS=Homo sapiens OX=9606 GN=ABCB1 PE=1 SV=3	1280	sp|P08183|MDR1_HUMANATP-dependent translocase ABCB1 OS=Homo sapiens OX=9606 GN=ABCB1 PE=1 SV=3	P08183	0	100%	2627.82	1280	1280
Q16610	ECM1_HUMANExtracellular matrix 1 OS=Homo sapiens OX=9606 GN=ECM1 PE=1 SV=2	540	sp|Q16610|ECM1_HUMANExtracellular matrix protein 1 OS=Homo sapiens OX=9606 GN=ECM1 PE=1 SV=2	Q16610	0	100%	1114.75	540	540
Q9NX40	OCAD1_HUMANOCIA domain-containing 1 OS=Homo sapiens OX=9606 GN=OCIAD1 PE=1 SV=1	245	sp|Q9NX40|OCAD1_HUMANOCIA domain-containing protein 1 OS=Homo sapiens OX=9606 GN=OCIAD1 PE=1 SV=1	Q9NX40	0	100%	508.834	245	245
P07942	LAMB1_HUMANLaminin subunit beta-1 OS=Homo sapiens OX=9606 GN=LAMB1 PE=1 SV=2	1786	sp|P07942|LAMB1_HUMANLaminin subunit beta-1 OS=Homo sapiens OX=9606 GN=LAMB1 PE=1 SV=2	P07942	0	100%	3705.99	1786	1786
Q9Y2Y0	AR2BP_HUMANADP-ribosylation factor 2-binding OS=Homo sapiens OX=9606 GN=ARL2BP PE=1 SV=1	163	sp|Q9Y2Y0|AR2BP_HUMANADP-ribosylation factor-like protein 2-binding protein OS=Homo sapiens OX=9606 GN=ARL2BP PE=1 SV=1	Q9Y2Y0	4.7e-117	100%	332.028	163	163
Q15434	RBMS2_HUMANRNA-binding single-stranded-interacting 2 OS=Homo sapiens OX=9606 GN=RBMS2 PE=1 SV=1	407	sp|Q15434|RBMS2_HUMANRNA-binding motif, single-stranded-interacting protein 2 OS=Homo sapiens OX=9606 GN=RBMS2 PE=1 SV=1	Q15434	0	100%	837.795	407	407
P80303	NUCB2_HUMANNucleobindin-2 OS=Homo sapiens OX=9606 GN=NUCB2 PE=1 SV=3	420	sp|P80303|NUCB2_HUMANNucleobindin-2 OS=Homo sapiens OX=9606 GN=NUCB2 PE=1 SV=3	P80303	0	100%	843.958	420	420
O75503	CLN5_HUMANCeroid-lipofuscinosis neuronal 5 OS=Homo sapiens OX=9606 GN=CLN5 PE=1 SV=2	358	sp|O75503|CLN5_HUMANCeroid-lipofuscinosis neuronal protein 5 OS=Homo sapiens OX=9606 GN=CLN5 PE=1 SV=2	O75503	0	100%	749.969	358	358
O14933	UB2L6_HUMANUbiquitin ISG15-conjugating enzyme E2 L6 OS=Homo sapiens OX=9606 GN=UBE2L6 PE=1 SV=4	153	sp|O14933|UB2L6_HUMANUbiquitin/ISG15-conjugating enzyme E2 L6 OS=Homo sapiens OX=9606 GN=UBE2L6 PE=1 SV=4	O14933	2.6e-110	100%	313.923	153	153
P09104	ENOG_HUMANGamma-enolase OS=Homo sapiens OX=9606 GN=ENO2 PE=1 SV=3	434	sp|P09104|ENOG_HUMANGamma-enolase OS=Homo sapiens OX=9606 GN=ENO2 PE=1 SV=3	P09104	0	100%	892.878	434	434
P54803	GALC_HUMANGalactocerebrosidase OS=Homo sapiens OX=9606 GN=GALC PE=1 SV=3	685	sp|P54803|GALC_HUMANGalactocerebrosidase OS=Homo sapiens OX=9606 GN=GALC PE=1 SV=3	P54803	0	100%	1414.44	685	685
Q9Y4G8	RPGF2_HUMANRap guanine nucleotide exchange factor 2 OS=Homo sapiens OX=9606 GN=RAPGEF2 PE=1 SV=1	1499	sp|Q9Y4G8|RPGF2_HUMANRap guanine nucleotide exchange factor 2 OS=Homo sapiens OX=9606 GN=RAPGEF2 PE=1 SV=1	Q9Y4G8	0	100%	3108.55	1499	1499
P20339	RAB5A_HUMANRas-related Rab-5A OS=Homo sapiens OX=9606 GN=RAB5A PE=1 SV=2	215	sp|P20339|RAB5A_HUMANRas-related protein Rab-5A OS=Homo sapiens OX=9606 GN=RAB5A PE=1 SV=2	P20339	1.8e-162	100%	451.44	215	215
P23634	AT2B4_HUMANPlasma membrane calcium-transporting ATPase 4 OS=Homo sapiens OX=9606 GN=ATP2B4 PE=1 SV=2	1241	sp|P23634|AT2B4_HUMANPlasma membrane calcium-transporting ATPase 4 OS=Homo sapiens OX=9606 GN=ATP2B4 PE=1 SV=2	P23634	0	100%	2559.64	1241	1241
Q6ZXV5	TMTC3_HUMAN O-mannosyl-transferase TMTC3 OS=Homo sapiens OX=9606 GN=TMTC3 PE=1 SV=2	915	sp|Q6ZXV5|TMTC3_HUMANProtein O-mannosyl-transferase TMTC3 OS=Homo sapiens OX=9606 GN=TMTC3 PE=1 SV=2	Q6ZXV5	0	100%	1887.46	915	915
Q8NBJ4	GOLM1_HUMANGolgi membrane 1 OS=Homo sapiens OX=9606 GN=GOLM1 PE=1 SV=1	401	sp|Q8NBJ4|GOLM1_HUMANGolgi membrane protein 1 OS=Homo sapiens OX=9606 GN=GOLM1 PE=1 SV=1	Q8NBJ4	0	100%	809.29	401	401
O75093	SLIT1_HUMANSlit homolog 1 OS=Homo sapiens OX=9606 GN=SLIT1 PE=1 SV=4	1534	sp|O75093|SLIT1_HUMANSlit homolog 1 protein OS=Homo sapiens OX=9606 GN=SLIT1 PE=1 SV=4	O75093	0	100%	3154	1534	1534
Q96K49	TM87B_HUMANTransmembrane 87B OS=Homo sapiens OX=9606 GN=TMEM87B PE=1 SV=1	555	sp|Q96K49|TM87B_HUMANTransmembrane protein 87B OS=Homo sapiens OX=9606 GN=TMEM87B PE=1 SV=1	Q96K49	0	100%	1144.8	555	555
Q12841	FSTL1_HUMANFollistatin-related 1 OS=Homo sapiens OX=9606 GN=FSTL1 PE=1 SV=1	308	sp|Q12841|FSTL1_HUMANFollistatin-related protein 1 OS=Homo sapiens OX=9606 GN=FSTL1 PE=1 SV=1	Q12841	0	100%	639.802	308	308
P61009	SPCS3_HUMANSignal peptidase complex subunit 3 OS=Homo sapiens OX=9606 GN=SPCS3 PE=1 SV=1	180	sp|P61009|SPCS3_HUMANSignal peptidase complex subunit 3 OS=Homo sapiens OX=9606 GN=SPCS3 PE=1 SV=1	P61009	1.1e-130	100%	367.851	180	180
O00469	PLOD2_HUMANProcollagen-lysine,2-oxoglutarate 5-dioxygenase 2 OS=Homo sapiens OX=9606 GN=PLOD2 PE=1 SV=2	737	sp|O00469|PLOD2_HUMANProcollagen-lysine,2-oxoglutarate 5-dioxygenase 2 OS=Homo sapiens OX=9606 GN=PLOD2 PE=1 SV=2	O00469	0	100%	1538.47	737	737
Q13308	PTK7_HUMANInactive tyrosine- kinase 7 OS=Homo sapiens OX=9606 GN=PTK7 PE=1 SV=2	1070	sp|Q13308|PTK7_HUMANInactive tyrosine-protein kinase 7 OS=Homo sapiens OX=9606 GN=PTK7 PE=1 SV=2	Q13308	0	100%	2221.43	1070	1070
Q9UII2	ATIF1_HUMANATPase mitochondrial OS=Homo sapiens OX=9606 GN=ATP5IF1 PE=1 SV=1	106	sp|Q9UII2|ATIF1_HUMANATPase inhibitor, mitochondrial OS=Homo sapiens OX=9606 GN=ATP5IF1 PE=1 SV=1	Q9UII2	8.7e-72	100%	212.616	106	106
Q00688	FKBP3_HUMANPeptidyl-prolyl cis-trans isomerase FKBP3 OS=Homo sapiens OX=9606 GN=FKBP3 PE=1 SV=1	224	sp|Q00688|FKBP3_HUMANPeptidyl-prolyl cis-trans isomerase FKBP3 OS=Homo sapiens OX=9606 GN=FKBP3 PE=1 SV=1	Q00688	2.7e-164	100%	456.833	224	224
Q5TC84	OGRL1_HUMANOpioid growth factor receptor 1 OS=Homo sapiens OX=9606 GN=OGFRL1 PE=2 SV=1	451	sp|Q5TC84|OGRL1_HUMANOpioid growth factor receptor-like protein 1 OS=Homo sapiens OX=9606 GN=OGFRL1 PE=2 SV=1	Q5TC84	0	100%	936.021	451	451
Q8IV20	LACC1_HUMANLaccase domain-containing 1 OS=Homo sapiens OX=9606 GN=LACC1 PE=1 SV=1	430	sp|Q8IV20|LACC1_HUMANLaccase domain-containing protein 1 OS=Homo sapiens OX=9606 GN=LACC1 PE=1 SV=1	Q8IV20	0	100%	893.264	430	430
P15151	PVR_HUMANPoliovirus receptor OS=Homo sapiens OX=9606 GN=PVR PE=1 SV=2	417	sp|P15151|PVR_HUMANPoliovirus receptor OS=Homo sapiens OX=9606 GN=PVR PE=1 SV=2	P15151	0	100%	858.21	417	417
Q9BSR8	YIPF4_HUMAN YIPF4 OS=Homo sapiens OX=9606 GN=YIPF4 PE=1 SV=1	244	sp|Q9BSR8|YIPF4_HUMANProtein YIPF4 OS=Homo sapiens OX=9606 GN=YIPF4 PE=1 SV=1	Q9BSR8	4.5e-174	100%	483.411	244	244
Q86X83	COMD2_HUMANCOMM domain-containing 2 OS=Homo sapiens OX=9606 GN=COMMD2 PE=1 SV=2	199	sp|Q86X83|COMD2_HUMANCOMM domain-containing protein 2 OS=Homo sapiens OX=9606 GN=COMMD2 PE=1 SV=2	Q86X83	1e-144	100%	405.216	199	199
Q8NDA8	MROH1_HUMANMaestro heat-like repeat-containing family member 1 OS=Homo sapiens OX=9606 GN=MROH1 PE=2 SV=3	1641	sp|Q8NDA8|MROH1_HUMANMaestro heat-like repeat-containing protein family member 1 OS=Homo sapiens OX=9606 GN=MROH1 PE=2 SV=3	Q8NDA8	0	100%	3331.19	1641	1641
Q8WW59	SPRY4_HUMANSPRY domain-containing 4 OS=Homo sapiens OX=9606 GN=SPRYD4 PE=1 SV=2	207	sp|Q8WW59|SPRY4_HUMANSPRY domain-containing protein 4 OS=Homo sapiens OX=9606 GN=SPRYD4 PE=1 SV=2	Q8WW59	2e-151	100%	422.935	207	207
Q03518	TAP1_HUMANAntigen peptide transporter 1 OS=Homo sapiens OX=9606 GN=TAP1 PE=1 SV=2	808	sp|Q03518|TAP1_HUMANAntigen peptide transporter 1 OS=Homo sapiens OX=9606 GN=TAP1 PE=1 SV=2	Q03518	0	100%	1627.84	808	808
Q6UWE0	LRSM1_HUMANE3 ubiquitin- ligase LRSAM1 OS=Homo sapiens OX=9606 GN=LRSAM1 PE=1 SV=1	723	sp|Q6UWE0|LRSM1_HUMANE3 ubiquitin-protein ligase LRSAM1 OS=Homo sapiens OX=9606 GN=LRSAM1 PE=1 SV=1	Q6UWE0	0	100%	1455.66	723	723
Q9H7C9	AAMDC_HUMANMth938 domain-containing OS=Homo sapiens OX=9606 GN=AAMDC PE=1 SV=1	122	sp|Q9H7C9|AAMDC_HUMANMth938 domain-containing protein OS=Homo sapiens OX=9606 GN=AAMDC PE=1 SV=1	Q9H7C9	3.4e-86	100%	250.366	122	122
Q8TBQ9	KISHA_HUMAN kish-A OS=Homo sapiens OX=9606 GN=TMEM167A PE=1 SV=1	72	sp|Q8TBQ9|KISHA_HUMANProtein kish-A OS=Homo sapiens OX=9606 GN=TMEM167A PE=1 SV=1	Q8TBQ9	2.4e-46	100%	145.206	72	72
P35237	SPB6_HUMANSerpin B6 OS=Homo sapiens OX=9606 GN=SERPINB6 PE=1 SV=3	376	sp|P35237|SPB6_HUMANSerpin B6 OS=Homo sapiens OX=9606 GN=SERPINB6 PE=1 SV=3	P35237	0	100%	781.941	376	376
Q92520	FAM3C_HUMAN FAM3C OS=Homo sapiens OX=9606 GN=FAM3C PE=1 SV=1	227	sp|Q92520|FAM3C_HUMANProtein FAM3C OS=Homo sapiens OX=9606 GN=FAM3C PE=1 SV=1	Q92520	2.4e-169	100%	469.929	227	227
Q96SW2	CRBN_HUMAN cereblon OS=Homo sapiens OX=9606 GN=CRBN PE=1 SV=1	442	sp|Q96SW2|CRBN_HUMANProtein cereblon OS=Homo sapiens OX=9606 GN=CRBN PE=1 SV=1	Q96SW2	0	100%	926.391	442	442
P21589	5NTD_HUMAN5 -nucleotidase OS=Homo sapiens OX=9606 GN=NT5E PE=1 SV=1	574	sp|P21589|5NTD_HUMAN5'-nucleotidase OS=Homo sapiens OX=9606 GN=NT5E PE=1 SV=1	P21589	0	100%	1189.87	574	574
Q9P2E9	RRBP1_HUMANRibosome-binding 1 OS=Homo sapiens OX=9606 GN=RRBP1 PE=1 SV=5	1410	sp|Q9P2E9|RRBP1_HUMANRibosome-binding protein 1 OS=Homo sapiens OX=9606 GN=RRBP1 PE=1 SV=5	Q9P2E9	0	100%	2762.64	1410	1410
Q9UBR2	CATZ_HUMANCathepsin Z OS=Homo sapiens OX=9606 GN=CTSZ PE=1 SV=1	303	sp|Q9UBR2|CATZ_HUMANCathepsin Z OS=Homo sapiens OX=9606 GN=CTSZ PE=1 SV=1	Q9UBR2	0	100%	630.943	303	303
P52943	CRIP2_HUMANCysteine-rich 2 OS=Homo sapiens OX=9606 GN=CRIP2 PE=1 SV=1	208	sp|P52943|CRIP2_HUMANCysteine-rich protein 2 OS=Homo sapiens OX=9606 GN=CRIP2 PE=1 SV=1	P52943	7.6e-152	100%	424.091	208	208
Q7Z3E5	ARMC9_HUMAN domain-containing ARMC9 OS=Homo sapiens OX=9606 GN=ARMC9 PE=1 SV=3	818	sp|Q7Z3E5|ARMC9_HUMANLisH domain-containing protein ARMC9 OS=Homo sapiens OX=9606 GN=ARMC9 PE=1 SV=3	Q7Z3E5	0	100%	1694.86	818	818
Q9Y2H6	FND3A_HUMANFibronectin type-III domain-containing 3A OS=Homo sapiens OX=9606 GN=FNDC3A PE=1 SV=4	1198	sp|Q9Y2H6|FND3A_HUMANFibronectin type-III domain-containing protein 3A OS=Homo sapiens OX=9606 GN=FNDC3A PE=1 SV=4	Q9Y2H6	0	100%	2477.2	1198	1198
Q15847	ADIRF_HUMANAdipogenesis regulatory factor OS=Homo sapiens OX=9606 GN=ADIRF PE=1 SV=1	76	sp|Q15847|ADIRF_HUMANAdipogenesis regulatory factor OS=Homo sapiens OX=9606 GN=ADIRF PE=1 SV=1	Q15847	6.4e-46	100%	144.436	76	76
Q92844	TANK_HUMANTRAF family member-associated NF-kappa-B activator OS=Homo sapiens OX=9606 GN=TANK PE=1 SV=2	425	sp|Q92844|TANK_HUMANTRAF family member-associated NF-kappa-B activator OS=Homo sapiens OX=9606 GN=TANK PE=1 SV=2	Q92844	0	100%	877.856	425	425
L0R6Q1	S35U4_HUMANSLC35A4 upstream open reading frame OS=Homo sapiens OX=9606 GN=SLC35A4 PE=3 SV=1	103	sp|L0R6Q1|S35U4_HUMANSLC35A4 upstream open reading frame protein OS=Homo sapiens OX=9606 GN=SLC35A4 PE=3 SV=1	L0R6Q1	9.2e-70	100%	207.223	103	103
Q86W25	LRR and PYD domains-containing 13 OS=Homo sapiens OX=9606 GN=NLRP13 PE=2 SV=2	1043	sp|Q86W25|NAL13_HUMANNACHT, LRR and PYD domains-containing protein 13 OS=Homo sapiens OX=9606 GN=NLRP13 PE=2 SV=2	Q86W25	0	100%	2150.56	1043	1043
O75674	TM1L1_HUMANTOM1 1 OS=Homo sapiens OX=9606 GN=TOM1L1 PE=1 SV=2	476	sp|O75674|TM1L1_HUMANTOM1-like protein 1 OS=Homo sapiens OX=9606 GN=TOM1L1 PE=1 SV=2	O75674	0	100%	981.86	476	476
Q9NW68	BSDC1_HUMANBSD domain-containing 1 OS=Homo sapiens OX=9606 GN=BSDC1 PE=1 SV=1	430	sp|Q9NW68|BSDC1_HUMANBSD domain-containing protein 1 OS=Homo sapiens OX=9606 GN=BSDC1 PE=1 SV=1	Q9NW68	0	100%	870.922	430	430
P21695	GPDA_HUMANGlycerol-3-phosphate dehydrogenase	349	sp|P21695|GPDA_HUMANGlycerol-3-phosphate dehydrogenase [NAD(+)], cytoplasmic OS=Homo sapiens OX=9606 GN=GPD1 PE=1 SV=4	P21695	0	100%	714.916	349	349
Q9BXS4	TMM59_HUMANTransmembrane 59 OS=Homo sapiens OX=9606 GN=TMEM59 PE=1 SV=1	323	sp|Q9BXS4|TMM59_HUMANTransmembrane protein 59 OS=Homo sapiens OX=9606 GN=TMEM59 PE=1 SV=1	Q9BXS4	0	100%	672.929	323	323
P10321	HLAC_HUMANHLA class I histocompatibility C alpha chain OS=Homo sapiens OX=9606 GN=HLA-C PE=1 SV=3	366	sp|P10321|HLAC_HUMANHLA class I histocompatibility antigen, C alpha chain OS=Homo sapiens OX=9606 GN=HLA-C PE=1 SV=3	P10321	0	100%	757.673	366	366
Q9H4G4	GAPR1_HUMANGolgi-associated plant pathogenesis-related 1 OS=Homo sapiens OX=9606 GN=GLIPR2 PE=1 SV=3	154	sp|Q9H4G4|GAPR1_HUMANGolgi-associated plant pathogenesis-related protein 1 OS=Homo sapiens OX=9606 GN=GLIPR2 PE=1 SV=3	Q9H4G4	2.8e-114	100%	324.324	154	154
Q92820	GGH_HUMANGamma-glutamyl hydrolase OS=Homo sapiens OX=9606 GN=GGH PE=1 SV=2	318	sp|Q92820|GGH_HUMANGamma-glutamyl hydrolase OS=Homo sapiens OX=9606 GN=GGH PE=1 SV=2	Q92820	0	100%	664.07	318	318
Q9UQN3	CHM2B_HUMANCharged multivesicular body 2b OS=Homo sapiens OX=9606 GN=CHMP2B PE=1 SV=1	213	sp|Q9UQN3|CHM2B_HUMANCharged multivesicular body protein 2b OS=Homo sapiens OX=9606 GN=CHMP2B PE=1 SV=1	Q9UQN3	5.3e-153	100%	427.172	213	213
P04439	HLAA_HUMANHLA class I histocompatibility A alpha chain OS=Homo sapiens OX=9606 GN=HLA-A PE=1 SV=2	365	sp|P04439|HLAA_HUMANHLA class I histocompatibility antigen, A alpha chain OS=Homo sapiens OX=9606 GN=HLA-A PE=1 SV=2	P04439	0	100%	756.518	365	365
Q8TED1	GPX8_HUMANProbable glutathione peroxidase 8 OS=Homo sapiens OX=9606 GN=GPX8 PE=1 SV=2	209	sp|Q8TED1|GPX8_HUMANProbable glutathione peroxidase 8 OS=Homo sapiens OX=9606 GN=GPX8 PE=1 SV=2	Q8TED1	9.9e-152	100%	423.705	209	209
P63218	GBG5_HUMANGuanine nucleotide-binding G(I) G(S) G(O) subunit gamma-5 OS=Homo sapiens OX=9606 GN=GNG5 PE=1 SV=3	68	sp|P63218|GBG5_HUMANGuanine nucleotide-binding protein G(I)/G(S)/G(O) subunit gamma-5 OS=Homo sapiens OX=9606 GN=GNG5 PE=1 SV=3	P63218	8.6e-44	100%	138.272	68	68
P22694	KAPCB_HUMA -dependent kinase catalytic subunit beta OS=Homo sapiens OX=9606 GN=PRKACB PE=1 SV=2	351	sp|P22694|KAPCB_HUMANcAMP-dependent protein kinase catalytic subunit beta OS=Homo sapiens OX=9606 GN=PRKACB PE=1 SV=2	P22694	0	100%	729.554	351	351
Q9UJ83	HACL1_HUMAN2-hydroxyacyl- lyase 1 OS=Homo sapiens OX=9606 GN=HACL1 PE=1 SV=2	578	sp|Q9UJ83|HACL1_HUMAN2-hydroxyacyl-CoA lyase 1 OS=Homo sapiens OX=9606 GN=HACL1 PE=1 SV=2	Q9UJ83	0	100%	1206.05	578	578
Q9Y624	JAM1_HUMANJunctional adhesion molecule A OS=Homo sapiens OX=9606 GN=F11R PE=1 SV=1	299	sp|Q9Y624|JAM1_HUMANJunctional adhesion molecule A OS=Homo sapiens OX=9606 GN=F11R PE=1 SV=1	Q9Y624	0	100%	613.609	299	299
P46934	NEDD4_HUMANE3 ubiquitin- ligase NEDD4 OS=Homo sapiens OX=9606 GN=NEDD4 PE=1 SV=4	1319	sp|P46934|NEDD4_HUMANE3 ubiquitin-protein ligase NEDD4 OS=Homo sapiens OX=9606 GN=NEDD4 PE=1 SV=4	P46934	0	100%	2752.62	1319	1319
Q9Y394	DHRS7_HUMANDehydrogenase reductase SDR family member 7 OS=Homo sapiens OX=9606 GN=DHRS7 PE=1 SV=1	339	sp|Q9Y394|DHRS7_HUMANDehydrogenase/reductase SDR family member 7 OS=Homo sapiens OX=9606 GN=DHRS7 PE=1 SV=1	Q9Y394	0	100%	693.73	339	339
Q96HD1	CREL1_HUMAN disulfide isomerase CRELD1 OS=Homo sapiens OX=9606 GN=CRELD1 PE=1 SV=3	420	sp|Q96HD1|CREL1_HUMANProtein disulfide isomerase CRELD1 OS=Homo sapiens OX=9606 GN=CRELD1 PE=1 SV=3	Q96HD1	0	100%	852.047	420	420
Q9Y2G5	OFUT2_HUMANGDP-fucose O-fucosyltransferase 2 OS=Homo sapiens OX=9606 GN=POFUT2 PE=1 SV=3	429	sp|Q9Y2G5|OFUT2_HUMANGDP-fucose protein O-fucosyltransferase 2 OS=Homo sapiens OX=9606 GN=POFUT2 PE=1 SV=3	Q9Y2G5	0	100%	888.641	429	429
Q9NVM4	ANM7_HUMAN arginine N-methyltransferase 7 OS=Homo sapiens OX=9606 GN=PRMT7 PE=1 SV=1	692	sp|Q9NVM4|ANM7_HUMANProtein arginine N-methyltransferase 7 OS=Homo sapiens OX=9606 GN=PRMT7 PE=1 SV=1	Q9NVM4	0	100%	1443.71	692	692
O95166	GBRAP_HUMANGamma-aminobutyric acid receptor-associated OS=Homo sapiens OX=9606 GN=GABARAP PE=1 SV=1	117	sp|O95166|GBRAP_HUMANGamma-aminobutyric acid receptor-associated protein OS=Homo sapiens OX=9606 GN=GABARAP PE=1 SV=1	O95166	6.5e-82	100%	239.195	117	117
Q96RF0	SNX18_HUMANSorting nexin-18 OS=Homo sapiens OX=9606 GN=SNX18 PE=1 SV=2	628	sp|Q96RF0|SNX18_HUMANSorting nexin-18 OS=Homo sapiens OX=9606 GN=SNX18 PE=1 SV=2	Q96RF0	0	100%	1291.95	628	628
Q96LJ7	DHRS1_HUMANDehydrogenase reductase SDR family member 1 OS=Homo sapiens OX=9606 GN=DHRS1 PE=1 SV=1	313	sp|Q96LJ7|DHRS1_HUMANDehydrogenase/reductase SDR family member 1 OS=Homo sapiens OX=9606 GN=DHRS1 PE=1 SV=1	Q96LJ7	0	100%	644.425	313	313
Q8NBM8	PCYXL_HUMANPrenylcysteine oxidase-like OS=Homo sapiens OX=9606 GN=PCYOX1L PE=1 SV=2	494	sp|Q8NBM8|PCYXL_HUMANPrenylcysteine oxidase-like OS=Homo sapiens OX=9606 GN=PCYOX1L PE=1 SV=2	Q8NBM8	0	100%	1021.92	494	494
P09914	IFIT1_HUMANInterferon-induced with tetratricopeptide repeats 1 OS=Homo sapiens OX=9606 GN=IFIT1 PE=1 SV=2	478	sp|P09914|IFIT1_HUMANInterferon-induced protein with tetratricopeptide repeats 1 OS=Homo sapiens OX=9606 GN=IFIT1 PE=1 SV=2	P09914	0	100%	993.416	478	478
P10619	PPGB_HUMANLysosomal protective OS=Homo sapiens OX=9606 GN=CTSA PE=1 SV=2	480	sp|P10619|PPGB_HUMANLysosomal protective protein OS=Homo sapiens OX=9606 GN=CTSA PE=1 SV=2	P10619	0	100%	996.882	480	480
Q9Y6A9	SPCS1_HUMANSignal peptidase complex subunit 1 OS=Homo sapiens OX=9606 GN=SPCS1 PE=1 SV=5	169	sp|Q9Y6A9|SPCS1_HUMANSignal peptidase complex subunit 1 OS=Homo sapiens OX=9606 GN=SPCS1 PE=1 SV=5	Q9Y6A9	2.7e-123	100%	348.206	169	169
P09493	TPM1_HUMANTropomyosin alpha-1 chain OS=Homo sapiens OX=9606 GN=TPM1 PE=1 SV=2	284	sp|P09493|TPM1_HUMANTropomyosin alpha-1 chain OS=Homo sapiens OX=9606 GN=TPM1 PE=1 SV=2	P09493	0	100%	528.094	284	284
O94808	GFPT2_HUMANGlutamine--fructose-6-phosphate aminotransferase	682	sp|O94808|GFPT2_HUMANGlutamine--fructose-6-phosphate aminotransferase [isomerizing] 2 OS=Homo sapiens OX=9606 GN=GFPT2 PE=1 SV=3	O94808	0	100%	1412.9	682	682
Q9GZM5	YIPF3_HUMAN YIPF3 OS=Homo sapiens OX=9606 GN=YIPF3 PE=1 SV=1	350	sp|Q9GZM5|YIPF3_HUMANProtein YIPF3 OS=Homo sapiens OX=9606 GN=YIPF3 PE=1 SV=1	Q9GZM5	0	100%	719.153	350	350
Q6P1Q0	LTMD1_HUMANLETM1 domain-containing 1 OS=Homo sapiens OX=9606 GN=LETMD1 PE=1 SV=1	360	sp|Q6P1Q0|LTMD1_HUMANLETM1 domain-containing protein 1 OS=Homo sapiens OX=9606 GN=LETMD1 PE=1 SV=1	Q6P1Q0	0	100%	744.191	360	360
P31947	1433S_HUMAN14-3-3 sigma OS=Homo sapiens OX=9606 GN=SFN PE=1 SV=1	248	sp|P31947|1433S_HUMAN14-3-3 protein sigma OS=Homo sapiens OX=9606 GN=SFN PE=1 SV=1	P31947	0	100%	509.22	248	248
Q9H2C0	GAN_HUMANGigaxonin OS=Homo sapiens OX=9606 GN=GAN PE=1 SV=1	597	sp|Q9H2C0|GAN_HUMANGigaxonin OS=Homo sapiens OX=9606 GN=GAN PE=1 SV=1	Q9H2C0	0	100%	1248.8	597	597
Q9Y281	COF2_HUMANCofilin-2 OS=Homo sapiens OX=9606 GN=CFL2 PE=1 SV=1	166	sp|Q9Y281|COF2_HUMANCofilin-2 OS=Homo sapiens OX=9606 GN=CFL2 PE=1 SV=1	Q9Y281	5.5e-119	100%	337.035	166	166
Q9Y6D6	BIG1_HUMANBrefeldin A-inhibited guanine nucleotide-exchange 1 OS=Homo sapiens OX=9606 GN=ARFGEF1 PE=1 SV=2	1849	sp|Q9Y6D6|BIG1_HUMANBrefeldin A-inhibited guanine nucleotide-exchange protein 1 OS=Homo sapiens OX=9606 GN=ARFGEF1 PE=1 SV=2	Q9Y6D6	0	100%	3859.69	1849	1849
Q92599	SEPT8_HUMANSeptin-8 OS=Homo sapiens OX=9606 GN=SEPTIN8 PE=1 SV=4	483	sp|Q92599|SEPT8_HUMANSeptin-8 OS=Homo sapiens OX=9606 GN=SEPTIN8 PE=1 SV=4	Q92599	0	100%	1008.82	483	483
Q8NAN2	MIGA1_HUMANMitoguardin 1 OS=Homo sapiens OX=9606 GN=MIGA1 PE=1 SV=1	632	sp|Q8NAN2|MIGA1_HUMANMitoguardin 1 OS=Homo sapiens OX=9606 GN=MIGA1 PE=1 SV=1	Q8NAN2	0	100%	1310.82	632	632
P45973	CBX5_HUMANChromobox homolog 5 OS=Homo sapiens OX=9606 GN=CBX5 PE=1 SV=1	191	sp|P45973|CBX5_HUMANChromobox protein homolog 5 OS=Homo sapiens OX=9606 GN=CBX5 PE=1 SV=1	P45973	8.5e-139	100%	389.423	191	191
Q15165	PON2_HUMANSerum paraoxonase arylesterase 2 OS=Homo sapiens OX=9606 GN=PON2 PE=1 SV=4	354	sp|Q15165|PON2_HUMANSerum paraoxonase/arylesterase 2 OS=Homo sapiens OX=9606 GN=PON2 PE=1 SV=4	Q15165	0	100%	722.235	354	354
P13747	HLAE_HUMANHLA class I histocompatibility alpha chain E OS=Homo sapiens OX=9606 GN=HLA-E PE=1 SV=4	358	sp|P13747|HLAE_HUMANHLA class I histocompatibility antigen, alpha chain E OS=Homo sapiens OX=9606 GN=HLA-E PE=1 SV=4	P13747	0	100%	741.495	358	358
Q9HBL7	PLRKT_HUMANPlasminogen receptor (KT) OS=Homo sapiens OX=9606 GN=PLGRKT PE=1 SV=1	147	sp|Q9HBL7|PLRKT_HUMANPlasminogen receptor (KT) OS=Homo sapiens OX=9606 GN=PLGRKT PE=1 SV=1	Q9HBL7	1.8e-103	100%	296.204	147	147
P61769	B2MG_HUMANBeta-2-microglobulin OS=Homo sapiens OX=9606 GN=B2M PE=1 SV=1	119	sp|P61769|B2MG_HUMANBeta-2-microglobulin OS=Homo sapiens OX=9606 GN=B2M PE=1 SV=1	P61769	3e-86	100%	250.366	119	119
Q9BQS8	FYCO1_HUMANFYVE and coiled-coil domain-containing 1 OS=Homo sapiens OX=9606 GN=FYCO1 PE=1 SV=3	1478	sp|Q9BQS8|FYCO1_HUMANFYVE and coiled-coil domain-containing protein 1 OS=Homo sapiens OX=9606 GN=FYCO1 PE=1 SV=3	Q9BQS8	0	100%	2994.91	1478	1478
P55085	PAR2_HUMAN ase-activated receptor 2 OS=Homo sapiens OX=9606 GN=F2RL1 PE=1 SV=1	397	sp|P55085|PAR2_HUMANProteinase-activated receptor 2 OS=Homo sapiens OX=9606 GN=F2RL1 PE=1 SV=1	P55085	0	100%	810.446	397	397
Q16611	BAK_HUMANBcl-2 homologous antagonist killer OS=Homo sapiens OX=9606 GN=BAK1 PE=1 SV=1	211	sp|Q16611|BAK_HUMANBcl-2 homologous antagonist/killer OS=Homo sapiens OX=9606 GN=BAK1 PE=1 SV=1	Q16611	6.4e-156	100%	434.491	211	211
P53701	CCHL_HUMANCytochrome c-type heme lyase OS=Homo sapiens OX=9606 GN=HCCS PE=1 SV=1	268	sp|P53701|CCHL_HUMANCytochrome c-type heme lyase OS=Homo sapiens OX=9606 GN=HCCS PE=1 SV=1	P53701	0	100%	559.296	268	268
Q8TCD1	CR032_HUMANUPF0729 C18orf32 OS=Homo sapiens OX=9606 GN=C18orf32 PE=1 SV=1	76	sp|Q8TCD1|CR032_HUMANUPF0729 protein C18orf32 OS=Homo sapiens OX=9606 GN=C18orf32 PE=1 SV=1	Q8TCD1	2.6e-50	100%	155.606	76	76
P80723	BASP1_HUMANBrain acid soluble 1 OS=Homo sapiens OX=9606 GN=BASP1 PE=1 SV=2	227	sp|P80723|BASP1_HUMANBrain acid soluble protein 1 OS=Homo sapiens OX=9606 GN=BASP1 PE=1 SV=2	P80723	2.3e-135	100%	383.645	227	227
Q9Y282	ERGI3_HUMANEndoplasmic reticulum-Golgi intermediate compartment 3 OS=Homo sapiens OX=9606 GN=ERGIC3 PE=1 SV=1	383	sp|Q9Y282|ERGI3_HUMANEndoplasmic reticulum-Golgi intermediate compartment protein 3 OS=Homo sapiens OX=9606 GN=ERGIC3 PE=1 SV=1	Q9Y282	0	100%	801.586	383	383
O95479	G6PE_HUMANGDH 6PGL endoplasmic bifunctional OS=Homo sapiens OX=9606 GN=H6PD PE=1 SV=2	791	sp|O95479|G6PE_HUMANGDH/6PGL endoplasmic bifunctional protein OS=Homo sapiens OX=9606 GN=H6PD PE=1 SV=2	O95479	0	100%	1631.69	791	791
Q96PM5	ZN363_HUMANRING finger and CHY zinc finger domain-containing 1 OS=Homo sapiens OX=9606 GN=RCHY1 PE=1 SV=1	261	sp|Q96PM5|ZN363_HUMANRING finger and CHY zinc finger domain-containing protein 1 OS=Homo sapiens OX=9606 GN=RCHY1 PE=1 SV=1	Q96PM5	0	100%	539.265	261	261
Q9UHN6	CEIP2_HUMANCell surface hyaluronidase OS=Homo sapiens OX=9606 GN=CEMIP2 PE=1 SV=1	1383	sp|Q9UHN6|CEIP2_HUMANCell surface hyaluronidase OS=Homo sapiens OX=9606 GN=CEMIP2 PE=1 SV=1	Q9UHN6	0	100%	2887.83	1383	1383
P09467	F16P1_HUMANFructose-1,6-bisphosphatase 1 OS=Homo sapiens OX=9606 GN=FBP1 PE=1 SV=5	338	sp|P09467|F16P1_HUMANFructose-1,6-bisphosphatase 1 OS=Homo sapiens OX=9606 GN=FBP1 PE=1 SV=5	P09467	0	100%	695.656	338	338
Q15067	ACOX1_HUMANPeroxisomal acyl-coenzyme A oxidase 1 OS=Homo sapiens OX=9606 GN=ACOX1 PE=1 SV=3	660	sp|Q15067|ACOX1_HUMANPeroxisomal acyl-coenzyme A oxidase 1 OS=Homo sapiens OX=9606 GN=ACOX1 PE=1 SV=3	Q15067	0	100%	1383.62	660	660
Q9BZM5	ULBP2_HUMANUL16-binding 2 OS=Homo sapiens OX=9606 GN=ULBP2 PE=1 SV=1	246	sp|Q9BZM5|ULBP2_HUMANUL16-binding protein 2 OS=Homo sapiens OX=9606 GN=ULBP2 PE=1 SV=1	Q9BZM5	0	100%	511.531	246	246
P30622	CLIP1_HUMANCAP-Gly domain-containing linker 1 OS=Homo sapiens OX=9606 GN=CLIP1 PE=1 SV=2	1438	sp|P30622|CLIP1_HUMANCAP-Gly domain-containing linker protein 1 OS=Homo sapiens OX=9606 GN=CLIP1 PE=1 SV=2	P30622	0	100%	2905.16	1438	1438
P32456	GBP2_HUMANGuanylate-binding 2 OS=Homo sapiens OX=9606 GN=GBP2 PE=1 SV=3	591	sp|P32456|GBP2_HUMANGuanylate-binding protein 2 OS=Homo sapiens OX=9606 GN=GBP2 PE=1 SV=3	P32456	0	100%	1222.61	591	591
P08134	RHOC_HUMANRho-related GTP-binding OS=Homo sapiens OX=9606 GN=RHOC PE=1 SV=1	193	sp|P08134|RHOC_HUMANRho-related GTP-binding protein RhoC OS=Homo sapiens OX=9606 GN=RHOC PE=1 SV=1	P08134	3.8e-143	100%	400.593	193	193
Q9P0R6	GSKIP_HUMANGSK3B-interacting OS=Homo sapiens OX=9606 GN=GSKIP PE=1 SV=2	139	sp|Q9P0R6|GSKIP_HUMANGSK3B-interacting protein OS=Homo sapiens OX=9606 GN=GSKIP PE=1 SV=2	Q9P0R6	1.6e-100	100%	288.115	139	139
O60831	PRAF2_HUMANPRA1 family 2 OS=Homo sapiens OX=9606 GN=PRAF2 PE=1 SV=1	178	sp|O60831|PRAF2_HUMANPRA1 family protein 2 OS=Homo sapiens OX=9606 GN=PRAF2 PE=1 SV=1	O60831	3.2e-125	100%	353.984	178	178
Q9UI15	TAGL3_HUMANTransgelin-3 OS=Homo sapiens OX=9606 GN=TAGLN3 PE=1 SV=2	199	sp|Q9UI15|TAGL3_HUMANTransgelin-3 OS=Homo sapiens OX=9606 GN=TAGLN3 PE=1 SV=2	Q9UI15	7.8e-150	100%	417.927	199	199
P42345	MTOR_HUMANSerine threonine- kinase mTOR OS=Homo sapiens OX=9606 GN=MTOR PE=1 SV=1	2549	sp|P42345|MTOR_HUMANSerine/threonine-protein kinase mTOR OS=Homo sapiens OX=9606 GN=MTOR PE=1 SV=1	P42345	0	100%	5307.65	2549	2549
Q08722	CD47_HUMANLeukocyte surface antigen CD47 OS=Homo sapiens OX=9606 GN=CD47 PE=1 SV=1	323	sp|Q08722|CD47_HUMANLeukocyte surface antigen CD47 OS=Homo sapiens OX=9606 GN=CD47 PE=1 SV=1	Q08722	0	100%	655.21	323	323
Q12846	STX4_HUMANSyntaxin-4 OS=Homo sapiens OX=9606 GN=STX4 PE=1 SV=2	297	sp|Q12846|STX4_HUMANSyntaxin-4 OS=Homo sapiens OX=9606 GN=STX4 PE=1 SV=2	Q12846	0	100%	600.512	297	297
P17813	EGLN_HUMANEndoglin OS=Homo sapiens OX=9606 GN=ENG PE=1 SV=2	658	sp|P17813|EGLN_HUMANEndoglin OS=Homo sapiens OX=9606 GN=ENG PE=1 SV=2	P17813	0	100%	1339.32	658	658
Q9UK22	FBX2_HUMANF-box only 2 OS=Homo sapiens OX=9606 GN=FBXO2 PE=1 SV=2	296	sp|Q9UK22|FBX2_HUMANF-box only protein 2 OS=Homo sapiens OX=9606 GN=FBXO2 PE=1 SV=2	Q9UK22	0	100%	598.586	296	296
Q969E2	SCAM4_HUMANSecretory carrier-associated membrane 4 OS=Homo sapiens OX=9606 GN=SCAMP4 PE=1 SV=1	229	sp|Q969E2|SCAM4_HUMANSecretory carrier-associated membrane protein 4 OS=Homo sapiens OX=9606 GN=SCAMP4 PE=1 SV=1	Q969E2	7.5e-169	100%	468.774	229	229
Q9Y3R5	DOP2_HUMAN dopey-2 OS=Homo sapiens OX=9606 GN=DOP1B PE=1 SV=5	2298	sp|Q9Y3R5|DOP2_HUMANProtein dopey-2 OS=Homo sapiens OX=9606 GN=DOP1B PE=1 SV=5	Q9Y3R5	0	100%	4717.53	2298	2298
O95716	RAB3D_HUMANRas-related Rab-3D OS=Homo sapiens OX=9606 GN=RAB3D PE=1 SV=1	219	sp|O95716|RAB3D_HUMANRas-related protein Rab-3D OS=Homo sapiens OX=9606 GN=RAB3D PE=1 SV=1	O95716	2.3e-164	100%	456.447	219	219
Q13637	RAB32_HUMANRas-related Rab-32 OS=Homo sapiens OX=9606 GN=RAB32 PE=1 SV=3	225	sp|Q13637|RAB32_HUMANRas-related protein Rab-32 OS=Homo sapiens OX=9606 GN=RAB32 PE=1 SV=3	Q13637	3.2e-169	100%	469.159	225	225
Q03519	TAP2_HUMANAntigen peptide transporter 2 OS=Homo sapiens OX=9606 GN=TAP2 PE=1 SV=1	686	sp|Q03519|TAP2_HUMANAntigen peptide transporter 2 OS=Homo sapiens OX=9606 GN=TAP2 PE=1 SV=1	Q03519	0	100%	1388.25	686	686
Q9P2C4	TM181_HUMANTransmembrane 181 OS=Homo sapiens OX=9606 GN=TMEM181 PE=1 SV=2	612	sp|Q9P2C4|TM181_HUMANTransmembrane protein 181 OS=Homo sapiens OX=9606 GN=TMEM181 PE=1 SV=2	Q9P2C4	0	100%	1268.06	612	612
Q15155	NOMO1_HUMANNodal modulator 1 OS=Homo sapiens OX=9606 GN=NOMO1 PE=1 SV=5	1222	sp|Q15155|NOMO1_HUMANNodal modulator 1 OS=Homo sapiens OX=9606 GN=NOMO1 PE=1 SV=5	Q15155	0	100%	2516.88	1222	1222
O95786	DDX58_HUMANAntiviral innate immune response receptor RIG-I OS=Homo sapiens OX=9606 GN=DDX58 PE=1 SV=2	925	sp|O95786|DDX58_HUMANAntiviral innate immune response receptor RIG-I OS=Homo sapiens OX=9606 GN=DDX58 PE=1 SV=2	O95786	0	100%	1921.36	925	925
O43278	SPIT1_HUMANKunitz-type protease inhibitor 1 OS=Homo sapiens OX=9606 GN=SPINT1 PE=1 SV=2	529	sp|O43278|SPIT1_HUMANKunitz-type protease inhibitor 1 OS=Homo sapiens OX=9606 GN=SPINT1 PE=1 SV=2	O43278	0	100%	1099.35	529	529
Q01484	ANK2_HUMANAnkyrin-2 OS=Homo sapiens OX=9606 GN=ANK2 PE=1 SV=4	3957	sp|Q01484|ANK2_HUMANAnkyrin-2 OS=Homo sapiens OX=9606 GN=ANK2 PE=1 SV=4	Q01484	0	100%	8092.64	3957	3957
Q99584	S10AD_HUMAN S100-A13 OS=Homo sapiens OX=9606 GN=S100A13 PE=1 SV=1	98	sp|Q99584|S10AD_HUMANProtein S100-A13 OS=Homo sapiens OX=9606 GN=S100A13 PE=1 SV=1	Q99584	1e-65	100%	196.438	98	98
Q9NYM9	BET1L_HUMANBET1 OS=Homo sapiens OX=9606 GN=BET1L PE=1 SV=1	111	sp|Q9NYM9|BET1L_HUMANBET1-like protein OS=Homo sapiens OX=9606 GN=BET1L PE=1 SV=1	Q9NYM9	4.2e-76	100%	223.787	111	111
Q6L8Q7	PDE12_HUMAN2 ,5 -phosphodiesterase 12 OS=Homo sapiens OX=9606 GN=PDE12 PE=1 SV=2	609	sp|Q6L8Q7|PDE12_HUMAN2',5'-phosphodiesterase 12 OS=Homo sapiens OX=9606 GN=PDE12 PE=1 SV=2	Q6L8Q7	0	100%	1263.83	609	609
Q16698	DECR_HUMAN2,4-dienoyl- mitochondrial OS=Homo sapiens OX=9606 GN=DECR1 PE=1 SV=1	335	sp|Q16698|DECR_HUMAN2,4-dienoyl-CoA reductase, mitochondrial OS=Homo sapiens OX=9606 GN=DECR1 PE=1 SV=1	Q16698	0	100%	687.182	335	335
Q9NQY0	BIN3_HUMANBridging integrator 3 OS=Homo sapiens OX=9606 GN=BIN3 PE=1 SV=1	253	sp|Q9NQY0|BIN3_HUMANBridging integrator 3 OS=Homo sapiens OX=9606 GN=BIN3 PE=1 SV=1	Q9NQY0	0	100%	518.464	253	253
Q6NXT6	TAPT1_HUMANTransmembrane anterior posterior transformation 1 homolog OS=Homo sapiens OX=9606 GN=TAPT1 PE=1 SV=1	567	sp|Q6NXT6|TAPT1_HUMANTransmembrane anterior posterior transformation protein 1 homolog OS=Homo sapiens OX=9606 GN=TAPT1 PE=1 SV=1	Q6NXT6	0	100%	1175.23	567	567
P08648	ITA5_HUMANIntegrin alpha-5 OS=Homo sapiens OX=9606 GN=ITGA5 PE=1 SV=2	1049	sp|P08648|ITA5_HUMANIntegrin alpha-5 OS=Homo sapiens OX=9606 GN=ITGA5 PE=1 SV=2	P08648	0	100%	2147.86	1049	1049
P54852	EMP3_HUMANEpithelial membrane 3 OS=Homo sapiens OX=9606 GN=EMP3 PE=1 SV=1	163	sp|P54852|EMP3_HUMANEpithelial membrane protein 3 OS=Homo sapiens OX=9606 GN=EMP3 PE=1 SV=1	P54852	1.8e-116	100%	330.487	163	163
O14966	RAB7L_HUMANRas-related Rab-7L1 OS=Homo sapiens OX=9606 GN=RAB29 PE=1 SV=1	203	sp|O14966|RAB7L_HUMANRas-related protein Rab-7L1 OS=Homo sapiens OX=9606 GN=RAB29 PE=1 SV=1	O14966	4.2e-152	100%	424.091	203	203
Q9UBR5	CKLF_HUMANChemokine-like factor OS=Homo sapiens OX=9606 GN=CKLF PE=1 SV=1	152	sp|Q9UBR5|CKLF_HUMANChemokine-like factor OS=Homo sapiens OX=9606 GN=CKLF PE=1 SV=1	Q9UBR5	9e-108	100%	307.375	152	152
Q5NDL2	EOGT_HUMANEGF domain-specific O-linked N-acetylglucosamine transferase OS=Homo sapiens OX=9606 GN=EOGT PE=1 SV=1	527	sp|Q5NDL2|EOGT_HUMANEGF domain-specific O-linked N-acetylglucosamine transferase OS=Homo sapiens OX=9606 GN=EOGT PE=1 SV=1	Q5NDL2	0	100%	1109.36	527	527
Q15005	SPCS2_HUMANSignal peptidase complex subunit 2 OS=Homo sapiens OX=9606 GN=SPCS2 PE=1 SV=3	226	sp|Q15005|SPCS2_HUMANSignal peptidase complex subunit 2 OS=Homo sapiens OX=9606 GN=SPCS2 PE=1 SV=3	Q15005	3.5e-167	100%	464.151	226	226
Q9NZ45	CISD1_HUMANCDGSH iron-sulfur domain-containing 1 OS=Homo sapiens OX=9606 GN=CISD1 PE=1 SV=1	108	sp|Q9NZ45|CISD1_HUMANCDGSH iron-sulfur domain-containing protein 1 OS=Homo sapiens OX=9606 GN=CISD1 PE=1 SV=1	Q9NZ45	4.3e-78	100%	228.794	108	108
O95297	MPZL1_HUMANMyelin zero 1 OS=Homo sapiens OX=9606 GN=MPZL1 PE=1 SV=1	269	sp|O95297|MPZL1_HUMANMyelin protein zero-like protein 1 OS=Homo sapiens OX=9606 GN=MPZL1 PE=1 SV=1	O95297	0	100%	555.058	269	269
Q9Y2Q9	RT28_HUMAN28S ribosomal mitochondrial OS=Homo sapiens OX=9606 GN=MRPS28 PE=1 SV=1	187	sp|Q9Y2Q9|RT28_HUMAN28S ribosomal protein S28, mitochondrial OS=Homo sapiens OX=9606 GN=MRPS28 PE=1 SV=1	Q9Y2Q9	2.4e-136	100%	382.874	187	187
O43169	CYB5B_HUMANCytochrome b5 type B OS=Homo sapiens OX=9606 GN=CYB5B PE=1 SV=3	150	sp|O43169|CYB5B_HUMANCytochrome b5 type B OS=Homo sapiens OX=9606 GN=CYB5B PE=1 SV=3	O43169	7.6e-109	100%	310.071	150	150
Q15629	TRAM1_HUMANTranslocating chain-associated membrane 1 OS=Homo sapiens OX=9606 GN=TRAM1 PE=1 SV=3	374	sp|Q15629|TRAM1_HUMANTranslocating chain-associated membrane protein 1 OS=Homo sapiens OX=9606 GN=TRAM1 PE=1 SV=3	Q15629	0	100%	772.311	374	374
Q9NVV0	TM38B_HUMANTrimeric intracellular cation channel type B OS=Homo sapiens OX=9606 GN=TMEM38B PE=1 SV=1	291	sp|Q9NVV0|TM38B_HUMANTrimeric intracellular cation channel type B OS=Homo sapiens OX=9606 GN=TMEM38B PE=1 SV=1	Q9NVV0	0	100%	603.979	291	291
Q9NRX4	PHP14_HUMAN14 kDa phosphohistidine phosphatase OS=Homo sapiens OX=9606 GN=PHPT1 PE=1 SV=1	125	sp|Q9NRX4|PHP14_HUMAN14 kDa phosphohistidine phosphatase OS=Homo sapiens OX=9606 GN=PHPT1 PE=1 SV=1	Q9NRX4	6.6e-89	100%	257.299	125	125
P07203	GPX1_HUMANGlutathione peroxidase 1 OS=Homo sapiens OX=9606 GN=GPX1 PE=1 SV=4	203	sp|P07203|GPX1_HUMANGlutathione peroxidase 1 OS=Homo sapiens OX=9606 GN=GPX1 PE=1 SV=4	P07203	1.6e-148	100%	415.231	203	203
Q1KMD3	HNRL2_HUMANHeterogeneous nuclear ribonucleo U 2 OS=Homo sapiens OX=9606 GN=HNRNPUL2 PE=1 SV=1	747	sp|Q1KMD3|HNRL2_HUMANHeterogeneous nuclear ribonucleoprotein U-like protein 2 OS=Homo sapiens OX=9606 GN=HNRNPUL2 PE=1 SV=1	Q1KMD3	0	100%	1523.84	747	747
O43657	TSN6_HUMANTetraspanin-6 OS=Homo sapiens OX=9606 GN=TSPAN6 PE=1 SV=1	245	sp|O43657|TSN6_HUMANTetraspanin-6 OS=Homo sapiens OX=9606 GN=TSPAN6 PE=1 SV=1	O43657	0	100%	507.294	245	245
Q96CD0	FBXL8_HUMANF-box LRR-repeat 8 OS=Homo sapiens OX=9606 GN=FBXL8 PE=1 SV=1	374	sp|Q96CD0|FBXL8_HUMANF-box/LRR-repeat protein 8 OS=Homo sapiens OX=9606 GN=FBXL8 PE=1 SV=1	Q96CD0	0	100%	723.391	374	374
Q13753	LAMC2_HUMANLaminin subunit gamma-2 OS=Homo sapiens OX=9606 GN=LAMC2 PE=1 SV=2	1193	sp|Q13753|LAMC2_HUMANLaminin subunit gamma-2 OS=Homo sapiens OX=9606 GN=LAMC2 PE=1 SV=2	Q13753	0	100%	2471.81	1193	1193
Q5VT79	AXA81_HUMANAnnexin A8 1 OS=Homo sapiens OX=9606 GN=ANXA8L1 PE=2 SV=2	327	sp|Q5VT79|AXA81_HUMANAnnexin A8-like protein 1 OS=Homo sapiens OX=9606 GN=ANXA8L1 PE=2 SV=2	Q5VT79	0	100%	677.552	327	327
P49459	UBE2A_HUMANUbiquitin-conjugating enzyme E2 A OS=Homo sapiens OX=9606 GN=UBE2A PE=1 SV=2	152	sp|P49459|UBE2A_HUMANUbiquitin-conjugating enzyme E2 A OS=Homo sapiens OX=9606 GN=UBE2A PE=1 SV=2	P49459	6.5e-112	100%	318.161	152	152
Q7Z5G4	GOGA7_HUMANGolgin subfamily A member 7 OS=Homo sapiens OX=9606 GN=GOLGA7 PE=1 SV=2	137	sp|Q7Z5G4|GOGA7_HUMANGolgin subfamily A member 7 OS=Homo sapiens OX=9606 GN=GOLGA7 PE=1 SV=2	Q7Z5G4	6.4e-99	100%	283.878	137	137
P01889	HLAB_HUMANHLA class I histocompatibility B alpha chain OS=Homo sapiens OX=9606 GN=HLA-B PE=1 SV=3	362	sp|P01889|HLAB_HUMANHLA class I histocompatibility antigen, B alpha chain OS=Homo sapiens OX=9606 GN=HLA-B PE=1 SV=3	P01889	0	100%	748.429	362	362
O00339	MATN2_HUMANMatrilin-2 OS=Homo sapiens OX=9606 GN=MATN2 PE=1 SV=4	956	sp|O00339|MATN2_HUMANMatrilin-2 OS=Homo sapiens OX=9606 GN=MATN2 PE=1 SV=4	O00339	0	100%	1980.68	956	956
P07311	ACYP1_HUMANAcylphosphatase-1 OS=Homo sapiens OX=9606 GN=ACYP1 PE=1 SV=2	99	sp|P07311|ACYP1_HUMANAcylphosphatase-1 OS=Homo sapiens OX=9606 GN=ACYP1 PE=1 SV=2	P07311	3.3e-69	100%	205.297	99	99
Q96RQ1	ERGI2_HUMANEndoplasmic reticulum-Golgi intermediate compartment 2 OS=Homo sapiens OX=9606 GN=ERGIC2 PE=1 SV=2	377	sp|Q96RQ1|ERGI2_HUMANEndoplasmic reticulum-Golgi intermediate compartment protein 2 OS=Homo sapiens OX=9606 GN=ERGIC2 PE=1 SV=2	Q96RQ1	0	100%	789.645	377	377
P61916	NPC2_HUMANNPC intracellular cholesterol transporter 2 OS=Homo sapiens OX=9606 GN=NPC2 PE=1 SV=1	151	sp|P61916|NPC2_HUMANNPC intracellular cholesterol transporter 2 OS=Homo sapiens OX=9606 GN=NPC2 PE=1 SV=1	P61916	1.9e-108	100%	309.301	151	151
O94905	ERLN2_HUMANErlin-2 OS=Homo sapiens OX=9606 GN=ERLIN2 PE=1 SV=1	339	sp|O94905|ERLN2_HUMANErlin-2 OS=Homo sapiens OX=9606 GN=ERLIN2 PE=1 SV=1	O94905	0	100%	696.427	339	339
Q8N668	COMD1_HUMANCOMM domain-containing 1 OS=Homo sapiens OX=9606 GN=COMMD1 PE=1 SV=1	190	sp|Q8N668|COMD1_HUMANCOMM domain-containing protein 1 OS=Homo sapiens OX=9606 GN=COMMD1 PE=1 SV=1	Q8N668	1.9e-139	100%	390.963	190	190
Q9HAT2	SIAE_HUMANSialate O-acetylesterase OS=Homo sapiens OX=9606 GN=SIAE PE=1 SV=1	523	sp|Q9HAT2|SIAE_HUMANSialate O-acetylesterase OS=Homo sapiens OX=9606 GN=SIAE PE=1 SV=1	Q9HAT2	0	100%	1095.88	523	523
P16422	EPCAM_HUMANEpithelial cell adhesion molecule OS=Homo sapiens OX=9606 GN=EPCAM PE=1 SV=2	314	sp|P16422|EPCAM_HUMANEpithelial cell adhesion molecule OS=Homo sapiens OX=9606 GN=EPCAM PE=1 SV=2	P16422	0	100%	652.514	314	314
Q01995	TAGL_HUMANTransgelin OS=Homo sapiens OX=9606 GN=TAGLN PE=1 SV=4	201	sp|Q01995|TAGL_HUMANTransgelin OS=Homo sapiens OX=9606 GN=TAGLN PE=1 SV=4	Q01995	7.5e-150	100%	418.313	201	201
Q99523	SORT_HUMANSortilin OS=Homo sapiens OX=9606 GN=SORT1 PE=1 SV=3	831	sp|Q99523|SORT_HUMANSortilin OS=Homo sapiens OX=9606 GN=SORT1 PE=1 SV=3	Q99523	0	100%	1728.38	831	831
Q9NP61	ARFG3_HUMANADP-ribosylation factor GTPase-activating 3 OS=Homo sapiens OX=9606 GN=ARFGAP3 PE=1 SV=1	516	sp|Q9NP61|ARFG3_HUMANADP-ribosylation factor GTPase-activating protein 3 OS=Homo sapiens OX=9606 GN=ARFGAP3 PE=1 SV=1	Q9NP61	0	100%	1070.84	516	516
P15514	AREG_HUMANAmphiregulin OS=Homo sapiens OX=9606 GN=AREG PE=1 SV=2	252	sp|P15514|AREG_HUMANAmphiregulin OS=Homo sapiens OX=9606 GN=AREG PE=1 SV=2	P15514	0	100%	523.472	252	252
Q5K651	SAMD9_HUMANSterile alpha motif domain-containing 9 OS=Homo sapiens OX=9606 GN=SAMD9 PE=1 SV=1	1589	sp|Q5K651|SAMD9_HUMANSterile alpha motif domain-containing protein 9 OS=Homo sapiens OX=9606 GN=SAMD9 PE=1 SV=1	Q5K651	0	100%	3291.9	1589	1589
Q9H0E2	TOLIP_HUMANToll-interacting OS=Homo sapiens OX=9606 GN=TOLLIP PE=1 SV=1	274	sp|Q9H0E2|TOLIP_HUMANToll-interacting protein OS=Homo sapiens OX=9606 GN=TOLLIP PE=1 SV=1	Q9H0E2	0	100%	567.77	274	274
Q96HJ9	FMC1_HUMAN FMC1 homolog OS=Homo sapiens OX=9606 GN=FMC1 PE=1 SV=2	113	sp|Q96HJ9|FMC1_HUMANProtein FMC1 homolog OS=Homo sapiens OX=9606 GN=FMC1 PE=1 SV=2	Q96HJ9	1.9e-78	100%	229.95	113	113
Q9NRX6	KISHB_HUMAN kish-B OS=Homo sapiens OX=9606 GN=TMEM167B PE=1 SV=1	74	sp|Q9NRX6|KISHB_HUMANProtein kish-B OS=Homo sapiens OX=9606 GN=TMEM167B PE=1 SV=1	Q9NRX6	1.5e-47	100%	148.288	74	74
P43155	CACP_HUMANCarnitine O-acetyltransferase OS=Homo sapiens OX=9606 GN=CRAT PE=1 SV=5	626	sp|P43155|CACP_HUMANCarnitine O-acetyltransferase OS=Homo sapiens OX=9606 GN=CRAT PE=1 SV=5	P43155	0	100%	1311.21	626	626
Q13530	SERC3_HUMANSerine incorporator 3 OS=Homo sapiens OX=9606 GN=SERINC3 PE=2 SV=2	473	sp|Q13530|SERC3_HUMANSerine incorporator 3 OS=Homo sapiens OX=9606 GN=SERINC3 PE=2 SV=2	Q13530	0	100%	967.607	473	473
Q9BRP8	PYM1_HUMANPartner of Y14 and mago OS=Homo sapiens OX=9606 GN=PYM1 PE=1 SV=1	204	sp|Q9BRP8|PYM1_HUMANPartner of Y14 and mago OS=Homo sapiens OX=9606 GN=PYM1 PE=1 SV=1	Q9BRP8	8.3e-142	100%	398.282	204	204
P62341	SELT_HUMANThioredoxin reductase-like seleno T OS=Homo sapiens OX=9606 GN=SELENOT PE=1 SV=2	195	sp|P62341|SELT_HUMANThioredoxin reductase-like selenoprotein T OS=Homo sapiens OX=9606 GN=SELENOT PE=1 SV=2	P62341	3.6e-144	100%	403.29	195	195
Q71U36	TBA1A_HUMANTubulin alpha-1A chain OS=Homo sapiens OX=9606 GN=TUBA1A PE=1 SV=1	451	sp|Q71U36|TBA1A_HUMANTubulin alpha-1A chain OS=Homo sapiens OX=9606 GN=TUBA1A PE=1 SV=1	Q71U36	0	100%	944.495	451	451
Q8NFF5	FAD1_HUMANFAD synthase OS=Homo sapiens OX=9606 GN=FLAD1 PE=1 SV=1	587	sp|Q8NFF5|FAD1_HUMANFAD synthase OS=Homo sapiens OX=9606 GN=FLAD1 PE=1 SV=1	Q8NFF5	0	100%	1207.2	587	587
Q5VVQ6	OTU1_HUMANUbiquitin thioesterase OTU1 OS=Homo sapiens OX=9606 GN=YOD1 PE=1 SV=1	348	sp|Q5VVQ6|OTU1_HUMANUbiquitin thioesterase OTU1 OS=Homo sapiens OX=9606 GN=YOD1 PE=1 SV=1	Q5VVQ6	0	100%	719.924	348	348
P13987	CD59_HUMANCD59 glyco OS=Homo sapiens OX=9606 GN=CD59 PE=1 SV=1	128	sp|P13987|CD59_HUMANCD59 glycoprotein OS=Homo sapiens OX=9606 GN=CD59 PE=1 SV=1	P13987	4.9e-92	100%	265.774	128	128
P28062	PSB8_HUMANProteasome subunit beta type-8 OS=Homo sapiens OX=9606 GN=PSMB8 PE=1 SV=3	276	sp|P28062|PSB8_HUMANProteasome subunit beta type-8 OS=Homo sapiens OX=9606 GN=PSMB8 PE=1 SV=3	P28062	0	100%	574.318	276	276
Q9BS40	LXN_HUMANLatexin OS=Homo sapiens OX=9606 GN=LXN PE=1 SV=2	222	sp|Q9BS40|LXN_HUMANLatexin OS=Homo sapiens OX=9606 GN=LXN PE=1 SV=2	Q9BS40	1.9e-167	100%	464.537	222	222
P27487	DPP4_HUMANDipeptidyl peptidase 4 OS=Homo sapiens OX=9606 GN=DPP4 PE=1 SV=2	766	sp|P27487|DPP4_HUMANDipeptidyl peptidase 4 OS=Homo sapiens OX=9606 GN=DPP4 PE=1 SV=2	P27487	0	100%	1602.8	766	766
Q6F5E8	CARL2_HUMANCapping Arp2 3 and myosin-I linker 2 OS=Homo sapiens OX=9606 GN=CARMIL2 PE=1 SV=2	1435	sp|Q6F5E8|CARL2_HUMANCapping protein, Arp2/3 and myosin-I linker protein 2 OS=Homo sapiens OX=9606 GN=CARMIL2 PE=1 SV=2	Q6F5E8	0	100%	2867.03	1435	1435
Q96DC9	OTUB2_HUMANUbiquitin thioesterase OTUB2 OS=Homo sapiens OX=9606 GN=OTUB2 PE=1 SV=2	234	sp|Q96DC9|OTUB2_HUMANUbiquitin thioesterase OTUB2 OS=Homo sapiens OX=9606 GN=OTUB2 PE=1 SV=2	Q96DC9	1.9e-174	100%	483.411	234	234
Q9NVZ3	NECP2_HUMANAdaptin ear-binding coat-associated 2 OS=Homo sapiens OX=9606 GN=NECAP2 PE=1 SV=1	263	sp|Q9NVZ3|NECP2_HUMANAdaptin ear-binding coat-associated protein 2 OS=Homo sapiens OX=9606 GN=NECAP2 PE=1 SV=1	Q9NVZ3	0	100%	537.339	263	263
Q9Y617	SERC_HUMANPhosphoserine aminotransferase OS=Homo sapiens OX=9606 GN=PSAT1 PE=1 SV=2	370	sp|Q9Y617|SERC_HUMANPhosphoserine aminotransferase OS=Homo sapiens OX=9606 GN=PSAT1 PE=1 SV=2	Q9Y617	0	100%	763.451	370	370
Q96RT7	GCP6_HUMANGamma-tubulin complex component 6 OS=Homo sapiens OX=9606 GN=TUBGCP6 PE=1 SV=3	1819	sp|Q96RT7|GCP6_HUMANGamma-tubulin complex component 6 OS=Homo sapiens OX=9606 GN=TUBGCP6 PE=1 SV=3	Q96RT7	0	100%	3742.2	1819	1819
P61604	CH10_HUMAN10 kDa heat shock mitochondrial OS=Homo sapiens OX=9606 GN=HSPE1 PE=1 SV=2	102	sp|P61604|CH10_HUMAN10 kDa heat shock protein, mitochondrial OS=Homo sapiens OX=9606 GN=HSPE1 PE=1 SV=2	P61604	9.4e-67	100%	199.519	102	102
Q5T1J5	CHCH9_HUMAN coiled-coil-helix-coiled-coil-helix domain-containing mitochondrial OS=Homo sapiens OX=9606 GN=CHCHD2P9 PE=5 SV=1	151	sp|Q5T1J5|CHCH9_HUMANPutative coiled-coil-helix-coiled-coil-helix domain-containing protein CHCHD2P9, mitochondrial OS=Homo sapiens OX=9606 GN=CHCHD2P9 PE=5 SV=1	Q5T1J5	3.7e-104	100%	298.13	151	151
P04049	RAF1_HUMANRAF proto-oncogene serine threonine- kinase OS=Homo sapiens OX=9606 GN=RAF1 PE=1 SV=1	648	sp|P04049|RAF1_HUMANRAF proto-oncogene serine/threonine-protein kinase OS=Homo sapiens OX=9606 GN=RAF1 PE=1 SV=1	P04049	0	100%	1361.28	648	648
Q9Y5K6	CD2AP_HUMANCD2-associated OS=Homo sapiens OX=9606 GN=CD2AP PE=1 SV=1	639	sp|Q9Y5K6|CD2AP_HUMANCD2-associated protein OS=Homo sapiens OX=9606 GN=CD2AP PE=1 SV=1	Q9Y5K6	0	100%	1283.86	639	639
P43246	MSH2_HUMANDNA mismatch repair Msh2 OS=Homo sapiens OX=9606 GN=MSH2 PE=1 SV=1	934	sp|P43246|MSH2_HUMANDNA mismatch repair protein Msh2 OS=Homo sapiens OX=9606 GN=MSH2 PE=1 SV=1	P43246	0	100%	1931.38	934	934
Q7Z7A3	CTU1_HUMANCytoplasmic tRNA 2-thiolation 1 OS=Homo sapiens OX=9606 GN=CTU1 PE=1 SV=1	348	sp|Q7Z7A3|CTU1_HUMANCytoplasmic tRNA 2-thiolation protein 1 OS=Homo sapiens OX=9606 GN=CTU1 PE=1 SV=1	Q7Z7A3	0	100%	679.093	348	348
Q8IYS1	P20D2_HUMANPeptidase M20 domain-containing 2 OS=Homo sapiens OX=9606 GN=PM20D2 PE=1 SV=2	436	sp|Q8IYS1|P20D2_HUMANPeptidase M20 domain-containing protein 2 OS=Homo sapiens OX=9606 GN=PM20D2 PE=1 SV=2	Q8IYS1	0	100%	899.812	436	436
P20248	CCNA2_HUMANCyclin-A2 OS=Homo sapiens OX=9606 GN=CCNA2 PE=1 SV=2	432	sp|P20248|CCNA2_HUMANCyclin-A2 OS=Homo sapiens OX=9606 GN=CCNA2 PE=1 SV=2	P20248	0	100%	892.108	432	432
Q96C36	P5CR2_HUMANPyrroline-5-carboxylate reductase 2 OS=Homo sapiens OX=9606 GN=PYCR2 PE=1 SV=1	320	sp|Q96C36|P5CR2_HUMANPyrroline-5-carboxylate reductase 2 OS=Homo sapiens OX=9606 GN=PYCR2 PE=1 SV=1	Q96C36	0	100%	647.506	320	320
P09601	HMOX1_HUMANHeme oxygenase 1 OS=Homo sapiens OX=9606 GN=HMOX1 PE=1 SV=1	288	sp|P09601|HMOX1_HUMANHeme oxygenase 1 OS=Homo sapiens OX=9606 GN=HMOX1 PE=1 SV=1	P09601	0	100%	591.652	288	288
P49748	ACADV_HUMANVery long-chain specific acyl- mitochondrial OS=Homo sapiens OX=9606 GN=ACADVL PE=1 SV=1	655	sp|P49748|ACADV_HUMANVery long-chain specific acyl-CoA dehydrogenase, mitochondrial OS=Homo sapiens OX=9606 GN=ACADVL PE=1 SV=1	P49748	0	100%	1340.87	655	655
P16219	ACADS_HUMANShort-chain specific acyl- mitochondrial OS=Homo sapiens OX=9606 GN=ACADS PE=1 SV=1	412	sp|P16219|ACADS_HUMANShort-chain specific acyl-CoA dehydrogenase, mitochondrial OS=Homo sapiens OX=9606 GN=ACADS PE=1 SV=1	P16219	0	100%	845.884	412	412
P20290	BTF3_HUMANTranscription factor BTF3 OS=Homo sapiens OX=9606 GN=BTF3 PE=1 SV=1	206	sp|P20290|BTF3_HUMANTranscription factor BTF3 OS=Homo sapiens OX=9606 GN=BTF3 PE=1 SV=1	P20290	2.5e-150	100%	419.853	206	206
Q8WY22	BRI3B_HUMANBRI3-binding OS=Homo sapiens OX=9606 GN=BRI3BP PE=1 SV=1	251	sp|Q8WY22|BRI3B_HUMANBRI3-binding protein OS=Homo sapiens OX=9606 GN=BRI3BP PE=1 SV=1	Q8WY22	0	100%	501.13	251	251
P49643	PRI2_HUMANDNA primase large subunit OS=Homo sapiens OX=9606 GN=PRIM2 PE=1 SV=2	509	sp|P49643|PRI2_HUMANDNA primase large subunit OS=Homo sapiens OX=9606 GN=PRIM2 PE=1 SV=2	P49643	0	100%	1047.34	509	509
P28562	DUS1_HUMANDual specificity phosphatase 1 OS=Homo sapiens OX=9606 GN=DUSP1 PE=1 SV=3	367	sp|P28562|DUS1_HUMANDual specificity protein phosphatase 1 OS=Homo sapiens OX=9606 GN=DUSP1 PE=1 SV=3	P28562	0	100%	754.592	367	367
Q14807	KIF22_HUMANKinesin KIF22 OS=Homo sapiens OX=9606 GN=KIF22 PE=1 SV=5	665	sp|Q14807|KIF22_HUMANKinesin-like protein KIF22 OS=Homo sapiens OX=9606 GN=KIF22 PE=1 SV=5	Q14807	0	100%	1347.03	665	665
Q9Y421	FA32A_HUMAN FAM32A OS=Homo sapiens OX=9606 GN=FAM32A PE=1 SV=2	112	sp|Q9Y421|FA32A_HUMANProtein FAM32A OS=Homo sapiens OX=9606 GN=FAM32A PE=1 SV=2	Q9Y421	2.4e-76	100%	224.557	112	112
Q658P3	STEA3_HUMANMetalloreductase STEAP3 OS=Homo sapiens OX=9606 GN=STEAP3 PE=1 SV=2	488	sp|Q658P3|STEA3_HUMANMetalloreductase STEAP3 OS=Homo sapiens OX=9606 GN=STEAP3 PE=1 SV=2	Q658P3	0	100%	998.038	488	488
Q15334	L2GL1_HUMANLethal(2) giant larvae homolog 1 OS=Homo sapiens OX=9606 GN=LLGL1 PE=1 SV=3	1064	sp|Q15334|L2GL1_HUMANLethal(2) giant larvae protein homolog 1 OS=Homo sapiens OX=9606 GN=LLGL1 PE=1 SV=3	Q15334	0	100%	2182.91	1064	1064
Q9H5V9	CX056_HUMANUPF0428 CXorf56 OS=Homo sapiens OX=9606 GN=CXorf56 PE=1 SV=1	222	sp|Q9H5V9|CX056_HUMANUPF0428 protein CXorf56 OS=Homo sapiens OX=9606 GN=CXorf56 PE=1 SV=1	Q9H5V9	1.3e-165	100%	459.914	222	222
Q99986	VRK1_HUMANSerine threonine- kinase VRK1 OS=Homo sapiens OX=9606 GN=VRK1 PE=1 SV=1	396	sp|Q99986|VRK1_HUMANSerine/threonine-protein kinase VRK1 OS=Homo sapiens OX=9606 GN=VRK1 PE=1 SV=1	Q99986	0	100%	822.387	396	396
Q9NVP1	DDX18_HUMANATP-dependent RNA helicase DDX18 OS=Homo sapiens OX=9606 GN=DDX18 PE=1 SV=2	670	sp|Q9NVP1|DDX18_HUMANATP-dependent RNA helicase DDX18 OS=Homo sapiens OX=9606 GN=DDX18 PE=1 SV=2	Q9NVP1	0	100%	1384.01	670	670
Q15758	AAAT_HUMANNeutral amino acid transporter B(0) OS=Homo sapiens OX=9606 GN=SLC1A5 PE=1 SV=2	541	sp|Q15758|AAAT_HUMANNeutral amino acid transporter B(0) OS=Homo sapiens OX=9606 GN=SLC1A5 PE=1 SV=2	Q15758	0	100%	1071.23	541	541
P46734	MP2K3_HUMANDual specificity mitogen-activated kinase kinase 3 OS=Homo sapiens OX=9606 GN=MAP2K3 PE=1 SV=2	347	sp|P46734|MP2K3_HUMANDual specificity mitogen-activated protein kinase kinase 3 OS=Homo sapiens OX=9606 GN=MAP2K3 PE=1 SV=2	P46734	0	100%	725.702	347	347
P17026	ZNF22_HUMANZinc finger 22 OS=Homo sapiens OX=9606 GN=ZNF22 PE=1 SV=3	224	sp|P17026|ZNF22_HUMANZinc finger protein 22 OS=Homo sapiens OX=9606 GN=ZNF22 PE=1 SV=3	P17026	8.2e-165	100%	457.988	224	224
P84022	SMAD3_HUMANMothers against decapentaplegic homolog 3 OS=Homo sapiens OX=9606 GN=SMAD3 PE=1 SV=1	425	sp|P84022|SMAD3_HUMANMothers against decapentaplegic homolog 3 OS=Homo sapiens OX=9606 GN=SMAD3 PE=1 SV=1	P84022	0	100%	890.567	425	425
P11908	PRPS2_HUMANRibose-phosphate pyrophosphokinase 2 OS=Homo sapiens OX=9606 GN=PRPS2 PE=1 SV=2	318	sp|P11908|PRPS2_HUMANRibose-phosphate pyrophosphokinase 2 OS=Homo sapiens OX=9606 GN=PRPS2 PE=1 SV=2	P11908	0	100%	655.596	318	318
Q9BZM4	ULBP3_HUMANUL16-binding 3 OS=Homo sapiens OX=9606 GN=ULBP3 PE=1 SV=1	244	sp|Q9BZM4|ULBP3_HUMANUL16-binding protein 3 OS=Homo sapiens OX=9606 GN=ULBP3 PE=1 SV=1	Q9BZM4	0	100%	508.834	244	244
Q8WUQ7	CATIN_HUMANCactin OS=Homo sapiens OX=9606 GN=CACTIN PE=1 SV=3	758	sp|Q8WUQ7|CATIN_HUMANCactin OS=Homo sapiens OX=9606 GN=CACTIN PE=1 SV=3	Q8WUQ7	0	100%	1546.95	758	758
Q9ULH1	ASAP1_HUMANArf-GAP with SH3 ANK repeat and PH domain-containing 1 OS=Homo sapiens OX=9606 GN=ASAP1 PE=1 SV=4	1129	sp|Q9ULH1|ASAP1_HUMANArf-GAP with SH3 domain, ANK repeat and PH domain-containing protein 1 OS=Homo sapiens OX=9606 GN=ASAP1 PE=1 SV=4	Q9ULH1	0	100%	2316.96	1129	1129
Q9H9Y2	RPF1_HUMANRibosome production factor 1 OS=Homo sapiens OX=9606 GN=RPF1 PE=1 SV=2	349	sp|Q9H9Y2|RPF1_HUMANRibosome production factor 1 OS=Homo sapiens OX=9606 GN=RPF1 PE=1 SV=2	Q9H9Y2	0	100%	724.931	349	349
Q8NBI5	S43A3_HUMANSolute carrier family 43 member 3 OS=Homo sapiens OX=9606 GN=SLC43A3 PE=1 SV=2	491	sp|Q8NBI5|S43A3_HUMANSolute carrier family 43 member 3 OS=Homo sapiens OX=9606 GN=SLC43A3 PE=1 SV=2	Q8NBI5	0	100%	1002.66	491	491
P55160	NCKPL_HUMANNck-associated 1-like OS=Homo sapiens OX=9606 GN=NCKAP1L PE=1 SV=3	1127	sp|P55160|NCKPL_HUMANNck-associated protein 1-like OS=Homo sapiens OX=9606 GN=NCKAP1L PE=1 SV=3	P55160	0	100%	2334.68	1127	1127
P26358	DNMT1_HUMANDNA (cytosine-5)-methyltransferase 1 OS=Homo sapiens OX=9606 GN=DNMT1 PE=1 SV=2	1616	sp|P26358|DNMT1_HUMANDNA (cytosine-5)-methyltransferase 1 OS=Homo sapiens OX=9606 GN=DNMT1 PE=1 SV=2	P26358	0	100%	3362.39	1616	1616
Q13185	CBX3_HUMANChromobox homolog 3 OS=Homo sapiens OX=9606 GN=CBX3 PE=1 SV=4	183	sp|Q13185|CBX3_HUMANChromobox protein homolog 3 OS=Homo sapiens OX=9606 GN=CBX3 PE=1 SV=4	Q13185	7.3e-133	100%	373.629	183	183
O94952	FBX21_HUMANF-box only 21 OS=Homo sapiens OX=9606 GN=FBXO21 PE=2 SV=2	628	sp|O94952|FBX21_HUMANF-box only protein 21 OS=Homo sapiens OX=9606 GN=FBXO21 PE=2 SV=2	O94952	0	100%	1305.43	628	628
Q0VDF9	HSP7E_HUMANHeat shock 70 kDa 14 OS=Homo sapiens OX=9606 GN=HSPA14 PE=1 SV=1	509	sp|Q0VDF9|HSP7E_HUMANHeat shock 70 kDa protein 14 OS=Homo sapiens OX=9606 GN=HSPA14 PE=1 SV=1	Q0VDF9	0	100%	1040.8	509	509
P49761	CLK3_HUMANDual specificity kinase CLK3 OS=Homo sapiens OX=9606 GN=CLK3 PE=1 SV=3	638	sp|P49761|CLK3_HUMANDual specificity protein kinase CLK3 OS=Homo sapiens OX=9606 GN=CLK3 PE=1 SV=3	P49761	0	100%	1314.67	638	638
Q8NBJ7	SUMF2_HUMANInactive C-alpha-formylglycine-generating enzyme 2 OS=Homo sapiens OX=9606 GN=SUMF2 PE=1 SV=2	301	sp|Q8NBJ7|SUMF2_HUMANInactive C-alpha-formylglycine-generating enzyme 2 OS=Homo sapiens OX=9606 GN=SUMF2 PE=1 SV=2	Q8NBJ7	0	100%	619.387	301	301
Q00059	TFAM_HUMANTranscription factor mitochondrial OS=Homo sapiens OX=9606 GN=TFAM PE=1 SV=1	246	sp|Q00059|TFAM_HUMANTranscription factor A, mitochondrial OS=Homo sapiens OX=9606 GN=TFAM PE=1 SV=1	Q00059	0	100%	506.138	246	246
O43633	CHM2A_HUMANCharged multivesicular body 2a OS=Homo sapiens OX=9606 GN=CHMP2A PE=1 SV=1	222	sp|O43633|CHM2A_HUMANCharged multivesicular body protein 2a OS=Homo sapiens OX=9606 GN=CHMP2A PE=1 SV=1	O43633	6.7e-157	100%	437.958	222	222
P37235	HPCL1_HUMANHippocalcin 1 OS=Homo sapiens OX=9606 GN=HPCAL1 PE=1 SV=3	193	sp|P37235|HPCL1_HUMANHippocalcin-like protein 1 OS=Homo sapiens OX=9606 GN=HPCAL1 PE=1 SV=3	P37235	1.9e-144	100%	404.06	193	193
Q13472	TOP3A_HUMANDNA topoisomerase 3-alpha OS=Homo sapiens OX=9606 GN=TOP3A PE=1 SV=1	1001	sp|Q13472|TOP3A_HUMANDNA topoisomerase 3-alpha OS=Homo sapiens OX=9606 GN=TOP3A PE=1 SV=1	Q13472	0	100%	2092.78	1001	1001
P24821	TENA_HUMANTenascin OS=Homo sapiens OX=9606 GN=TNC PE=1 SV=3	2201	sp|P24821|TENA_HUMANTenascin OS=Homo sapiens OX=9606 GN=TNC PE=1 SV=3	P24821	0	100%	4551.12	2201	2201
Q9GZL7	WDR12_HUMANRibosome biogenesis WDR12 OS=Homo sapiens OX=9606 GN=WDR12 PE=1 SV=2	423	sp|Q9GZL7|WDR12_HUMANRibosome biogenesis protein WDR12 OS=Homo sapiens OX=9606 GN=WDR12 PE=1 SV=2	Q9GZL7	0	100%	869.766	423	423
Q96DG6	CMBL_HUMANCarboxymethylenebutenolidase homolog OS=Homo sapiens OX=9606 GN=CMBL PE=1 SV=1	245	sp|Q96DG6|CMBL_HUMANCarboxymethylenebutenolidase homolog OS=Homo sapiens OX=9606 GN=CMBL PE=1 SV=1	Q96DG6	0	100%	515.383	245	245
Q13526	PIN1_HUMANPeptidyl-prolyl cis-trans isomerase NIMA-interacting 1 OS=Homo sapiens OX=9606 GN=PIN1 PE=1 SV=1	163	sp|Q13526|PIN1_HUMANPeptidyl-prolyl cis-trans isomerase NIMA-interacting 1 OS=Homo sapiens OX=9606 GN=PIN1 PE=1 SV=1	Q13526	1.8e-119	100%	338.191	163	163
P78540	ARGI2_HUMANArginase- mitochondrial OS=Homo sapiens OX=9606 GN=ARG2 PE=1 SV=1	354	sp|P78540|ARGI2_HUMANArginase-2, mitochondrial OS=Homo sapiens OX=9606 GN=ARG2 PE=1 SV=1	P78540	0	100%	728.013	354	354
P63146	UBE2B_HUMANUbiquitin-conjugating enzyme E2 B OS=Homo sapiens OX=9606 GN=UBE2B PE=1 SV=1	152	sp|P63146|UBE2B_HUMANUbiquitin-conjugating enzyme E2 B OS=Homo sapiens OX=9606 GN=UBE2B PE=1 SV=1	P63146	4.8e-111	100%	315.849	152	152
Q8NAB2	KBTB3_HUMANKelch repeat and BTB domain-containing 3 OS=Homo sapiens OX=9606 GN=KBTBD3 PE=2 SV=3	612	sp|Q8NAB2|KBTB3_HUMANKelch repeat and BTB domain-containing protein 3 OS=Homo sapiens OX=9606 GN=KBTBD3 PE=2 SV=3	Q8NAB2	0	100%	1275.77	612	612
Q9UIV1	CNOT7_HUMANCCR4-NOT transcription complex subunit 7 OS=Homo sapiens OX=9606 GN=CNOT7 PE=1 SV=3	285	sp|Q9UIV1|CNOT7_HUMANCCR4-NOT transcription complex subunit 7 OS=Homo sapiens OX=9606 GN=CNOT7 PE=1 SV=3	Q9UIV1	0	100%	595.89	285	285
Q01973	ROR1_HUMANInactive tyrosine- kinase transmembrane receptor ROR1 OS=Homo sapiens OX=9606 GN=ROR1 PE=1 SV=2	937	sp|Q01973|ROR1_HUMANInactive tyrosine-protein kinase transmembrane receptor ROR1 OS=Homo sapiens OX=9606 GN=ROR1 PE=1 SV=2	Q01973	0	100%	1956.03	937	937
O14678	ABCD4_HUMANATP-binding cassette sub-family D member 4 OS=Homo sapiens OX=9606 GN=ABCD4 PE=1 SV=1	606	sp|O14678|ABCD4_HUMANATP-binding cassette sub-family D member 4 OS=Homo sapiens OX=9606 GN=ABCD4 PE=1 SV=1	O14678	0	100%	1241.48	606	606
Q9Y3B9	RRP15_HUMANRRP15 OS=Homo sapiens OX=9606 GN=RRP15 PE=1 SV=2	282	sp|Q9Y3B9|RRP15_HUMANRRP15-like protein OS=Homo sapiens OX=9606 GN=RRP15 PE=1 SV=2	Q9Y3B9	0	100%	569.311	282	282
O15347	HMGB3_HUMANHigh mobility group B3 OS=Homo sapiens OX=9606 GN=HMGB3 PE=1 SV=4	200	sp|O15347|HMGB3_HUMANHigh mobility group protein B3 OS=Homo sapiens OX=9606 GN=HMGB3 PE=1 SV=4	O15347	2.1e-140	100%	394.045	200	200
Q9UN76	S6A14_HUMANSodium- and chloride-dependent neutral and basic amino acid transporter B(0+) OS=Homo sapiens OX=9606 GN=SLC6A14 PE=2 SV=1	642	sp|Q9UN76|S6A14_HUMANSodium- and chloride-dependent neutral and basic amino acid transporter B(0+) OS=Homo sapiens OX=9606 GN=SLC6A14 PE=2 SV=1	Q9UN76	0	100%	1313.13	642	642
Q9Y244	POMP_HUMANProteasome maturation OS=Homo sapiens OX=9606 GN=POMP PE=1 SV=1	141	sp|Q9Y244|POMP_HUMANProteasome maturation protein OS=Homo sapiens OX=9606 GN=POMP PE=1 SV=1	Q9Y244	9.6e-99	100%	283.878	141	141
P12235	ADT1_HUMANADP ATP translocase 1 OS=Homo sapiens OX=9606 GN=SLC25A4 PE=1 SV=4	298	sp|P12235|ADT1_HUMANADP/ATP translocase 1 OS=Homo sapiens OX=9606 GN=SLC25A4 PE=1 SV=4	P12235	0	100%	610.912	298	298
Q99880	H2B1L_HUMANHistone H2B type 1-L OS=Homo sapiens OX=9606 GN=H2BC13 PE=1 SV=3	126	sp|Q99880|H2B1L_HUMANHistone H2B type 1-L OS=Homo sapiens OX=9606 GN=H2BC13 PE=1 SV=3	Q99880	2e-87	100%	253.832	126	126
O75691	UTP20_HUMANSmall subunit processome component 20 homolog OS=Homo sapiens OX=9606 GN=UTP20 PE=1 SV=3	2785	sp|O75691|UTP20_HUMANSmall subunit processome component 20 homolog OS=Homo sapiens OX=9606 GN=UTP20 PE=1 SV=3	O75691	0	100%	5722.9	2785	2785
Q9NQZ2	SAS10_HUMANSomething about silencing 10 OS=Homo sapiens OX=9606 GN=UTP3 PE=1 SV=1	479	sp|Q9NQZ2|SAS10_HUMANSomething about silencing protein 10 OS=Homo sapiens OX=9606 GN=UTP3 PE=1 SV=1	Q9NQZ2	0	100%	962.6	479	479
Q99717	SMAD5_HUMANMothers against decapentaplegic homolog 5 OS=Homo sapiens OX=9606 GN=SMAD5 PE=1 SV=1	465	sp|Q99717|SMAD5_HUMANMothers against decapentaplegic homolog 5 OS=Homo sapiens OX=9606 GN=SMAD5 PE=1 SV=1	Q99717	0	100%	967.992	465	465
Q96ST2	IWS1_HUMAN IWS1 homolog OS=Homo sapiens OX=9606 GN=IWS1 PE=1 SV=2	819	sp|Q96ST2|IWS1_HUMANProtein IWS1 homolog OS=Homo sapiens OX=9606 GN=IWS1 PE=1 SV=2	Q96ST2	0	100%	1630.92	819	819
O00483	NDUA4_HUMANCytochrome c oxidase subunit NDUFA4 OS=Homo sapiens OX=9606 GN=NDUFA4 PE=1 SV=1	81	sp|O00483|NDUA4_HUMANCytochrome c oxidase subunit NDUFA4 OS=Homo sapiens OX=9606 GN=NDUFA4 PE=1 SV=1	O00483	5.1e-56	100%	170.629	81	81
Q15397	PUM3_HUMANPumilio homolog 3 OS=Homo sapiens OX=9606 GN=PUM3 PE=1 SV=3	648	sp|Q15397|PUM3_HUMANPumilio homolog 3 OS=Homo sapiens OX=9606 GN=PUM3 PE=1 SV=3	Q15397	0	100%	1335.47	648	648
Q9H3G5	CPVL_HUMANProbable serine carboxypeptidase CPVL OS=Homo sapiens OX=9606 GN=CPVL PE=1 SV=2	476	sp|Q9H3G5|CPVL_HUMANProbable serine carboxypeptidase CPVL OS=Homo sapiens OX=9606 GN=CPVL PE=1 SV=2	Q9H3G5	0	100%	988.023	476	476
Q9UBT7	CTNL1_HUMANAlpha-catulin OS=Homo sapiens OX=9606 GN=CTNNAL1 PE=1 SV=2	734	sp|Q9UBT7|CTNL1_HUMANAlpha-catulin OS=Homo sapiens OX=9606 GN=CTNNAL1 PE=1 SV=2	Q9UBT7	0	100%	1504.96	734	734
Q13057	COASY_HUMANBifunctional coenzyme A synthase OS=Homo sapiens OX=9606 GN=COASY PE=1 SV=4	564	sp|Q13057|COASY_HUMANBifunctional coenzyme A synthase OS=Homo sapiens OX=9606 GN=COASY PE=1 SV=4	Q13057	0	100%	1149.81	564	564
Q9BVP2	GNL3_HUMANGuanine nucleotide-binding -like 3 OS=Homo sapiens OX=9606 GN=GNL3 PE=1 SV=2	549	sp|Q9BVP2|GNL3_HUMANGuanine nucleotide-binding protein-like 3 OS=Homo sapiens OX=9606 GN=GNL3 PE=1 SV=2	Q9BVP2	0	100%	1126.69	549	549
P05386	RLA1_HUMAN60S acidic ribosomal P1 OS=Homo sapiens OX=9606 GN=RPLP1 PE=1 SV=1	114	sp|P05386|RLA1_HUMAN60S acidic ribosomal protein P1 OS=Homo sapiens OX=9606 GN=RPLP1 PE=1 SV=1	P05386	2.3e-76	100%	224.942	114	114
P35625	TIMP3_HUMANMetallo ase inhibitor 3 OS=Homo sapiens OX=9606 GN=TIMP3 PE=1 SV=2	211	sp|P35625|TIMP3_HUMANMetalloproteinase inhibitor 3 OS=Homo sapiens OX=9606 GN=TIMP3 PE=1 SV=2	P35625	6.3e-159	100%	442.195	211	211
P14635	CCNB1_HUMANG2 mitotic-specific cyclin-B1 OS=Homo sapiens OX=9606 GN=CCNB1 PE=1 SV=1	433	sp|P14635|CCNB1_HUMANG2/mitotic-specific cyclin-B1 OS=Homo sapiens OX=9606 GN=CCNB1 PE=1 SV=1	P14635	0	100%	893.264	433	433
P29317	EPHA2_HUMANEphrin type-A receptor 2 OS=Homo sapiens OX=9606 GN=EPHA2 PE=1 SV=2	976	sp|P29317|EPHA2_HUMANEphrin type-A receptor 2 OS=Homo sapiens OX=9606 GN=EPHA2 PE=1 SV=2	P29317	0	100%	2040	976	976
Q96CX2	KCD12_HUMANBTB POZ domain-containing KCTD12 OS=Homo sapiens OX=9606 GN=KCTD12 PE=1 SV=1	325	sp|Q96CX2|KCD12_HUMANBTB/POZ domain-containing protein KCTD12 OS=Homo sapiens OX=9606 GN=KCTD12 PE=1 SV=1	Q96CX2	0	100%	655.21	325	325
Q86YN1	DOPP1_HUMANDolichyldiphosphatase 1 OS=Homo sapiens OX=9606 GN=DOLPP1 PE=2 SV=1	238	sp|Q86YN1|DOPP1_HUMANDolichyldiphosphatase 1 OS=Homo sapiens OX=9606 GN=DOLPP1 PE=2 SV=1	Q86YN1	1.4e-175	100%	486.493	238	238
Q11128	FUT5_HUMANAlpha-(1,3)-fucosyltransferase 5 OS=Homo sapiens OX=9606 GN=FUT5 PE=2 SV=1	374	sp|Q11128|FUT5_HUMANAlpha-(1,3)-fucosyltransferase 5 OS=Homo sapiens OX=9606 GN=FUT5 PE=2 SV=1	Q11128	0	100%	773.081	374	374
Q99543	DNJC2_HUMAN homolog subfamily C member 2 OS=Homo sapiens OX=9606 GN=DNAJC2 PE=1 SV=4	621	sp|Q99543|DNJC2_HUMANDnaJ homolog subfamily C member 2 OS=Homo sapiens OX=9606 GN=DNAJC2 PE=1 SV=4	Q99543	0	100%	1275.77	621	621
Q8N488	RYBP_HUMANRING1 and YY1-binding OS=Homo sapiens OX=9606 GN=RYBP PE=1 SV=2	228	sp|Q8N488|RYBP_HUMANRING1 and YY1-binding protein OS=Homo sapiens OX=9606 GN=RYBP PE=1 SV=2	Q8N488	4.3e-164	100%	456.447	228	228
Q330K2	NDUF6_HUMANNADH dehydrogenase (ubiquinone) complex assembly factor 6 OS=Homo sapiens OX=9606 GN=NDUFAF6 PE=1 SV=2	333	sp|Q330K2|NDUF6_HUMANNADH dehydrogenase (ubiquinone) complex I, assembly factor 6 OS=Homo sapiens OX=9606 GN=NDUFAF6 PE=1 SV=2	Q330K2	0	100%	695.656	333	333
Q9NRZ9	HELLS_HUMANLymphoid-specific helicase OS=Homo sapiens OX=9606 GN=HELLS PE=1 SV=1	838	sp|Q9NRZ9|HELLS_HUMANLymphoid-specific helicase OS=Homo sapiens OX=9606 GN=HELLS PE=1 SV=1	Q9NRZ9	0	100%	1729.53	838	838
P33316	DUT_HUMANDeoxyuridine 5 -triphosphate mitochondrial OS=Homo sapiens OX=9606 GN=DUT PE=1 SV=4	252	sp|P33316|DUT_HUMANDeoxyuridine 5'-triphosphate nucleotidohydrolase, mitochondrial OS=Homo sapiens OX=9606 GN=DUT PE=1 SV=4	P33316	0	100%	510.76	252	252
P61218	RPAB2_HUMANDNA-directed RNA polymerases and III subunit RPABC2 OS=Homo sapiens OX=9606 GN=POLR2F PE=1 SV=1	127	sp|P61218|RPAB2_HUMANDNA-directed RNA polymerases I, II, and III subunit RPABC2 OS=Homo sapiens OX=9606 GN=POLR2F PE=1 SV=1	P61218	1.9e-88	100%	256.529	127	127
Q9BRS2	RIOK1_HUMANSerine threonine- kinase RIO1 OS=Homo sapiens OX=9606 GN=RIOK1 PE=1 SV=2	568	sp|Q9BRS2|RIOK1_HUMANSerine/threonine-protein kinase RIO1 OS=Homo sapiens OX=9606 GN=RIOK1 PE=1 SV=2	Q9BRS2	0	100%	1181.01	568	568
P18085	ARF4_HUMANADP-ribosylation factor 4 OS=Homo sapiens OX=9606 GN=ARF4 PE=1 SV=3	180	sp|P18085|ARF4_HUMANADP-ribosylation factor 4 OS=Homo sapiens OX=9606 GN=ARF4 PE=1 SV=3	P18085	1.1e-131	100%	370.548	180	180
Q9NV31	IMP3_HUMANU3 small nucleolar ribonucleo IMP3 OS=Homo sapiens OX=9606 GN=IMP3 PE=1 SV=1	184	sp|Q9NV31|IMP3_HUMANU3 small nucleolar ribonucleoprotein protein IMP3 OS=Homo sapiens OX=9606 GN=IMP3 PE=1 SV=1	Q9NV31	4.9e-132	100%	371.703	184	184
Q9NZJ9	NUDT4_HUMANDiphosphoinositol polyphosphate phosphohydrolase 2 OS=Homo sapiens OX=9606 GN=NUDT4 PE=1 SV=2	180	sp|Q9NZJ9|NUDT4_HUMANDiphosphoinositol polyphosphate phosphohydrolase 2 OS=Homo sapiens OX=9606 GN=NUDT4 PE=1 SV=2	Q9NZJ9	8e-134	100%	375.941	180	180
P57764	GSDMD_HUMANGasdermin-D OS=Homo sapiens OX=9606 GN=GSDMD PE=1 SV=1	484	sp|P57764|GSDMD_HUMANGasdermin-D OS=Homo sapiens OX=9606 GN=GSDMD PE=1 SV=1	P57764	0	100%	979.163	484	484
Q8IVL1	NAV2_HUMANNeuron navigator 2 OS=Homo sapiens OX=9606 GN=NAV2 PE=1 SV=3	2488	sp|Q8IVL1|NAV2_HUMANNeuron navigator 2 OS=Homo sapiens OX=9606 GN=NAV2 PE=1 SV=3	Q8IVL1	0	100%	5083.46	2488	2488
O15116	LSM1_HUMANU6 snRNA-associated Sm LSm1 OS=Homo sapiens OX=9606 GN=LSM1 PE=1 SV=1	133	sp|O15116|LSM1_HUMANU6 snRNA-associated Sm-like protein LSm1 OS=Homo sapiens OX=9606 GN=LSM1 PE=1 SV=1	O15116	6.4e-92	100%	265.774	133	133
Q6P9A2	GLT18_HUMANPolypeptide N-acetylgalactosaminyltransferase 18 OS=Homo sapiens OX=9606 GN=GALNT18 PE=2 SV=2	607	sp|Q6P9A2|GLT18_HUMANPolypeptide N-acetylgalactosaminyltransferase 18 OS=Homo sapiens OX=9606 GN=GALNT18 PE=2 SV=2	Q6P9A2	0	100%	1265.37	607	607
Q8NFP9	NBEA_HUMANNeurobeachin OS=Homo sapiens OX=9606 GN=NBEA PE=1 SV=3	2946	sp|Q8NFP9|NBEA_HUMANNeurobeachin OS=Homo sapiens OX=9606 GN=NBEA PE=1 SV=3	Q8NFP9	0	100%	6136.22	2946	2946
O60675	MAFK_HUMANTranscription factor OS=Homo sapiens OX=9606 GN=MAFK PE=1 SV=1	156	sp|O60675|MAFK_HUMANTranscription factor MafK OS=Homo sapiens OX=9606 GN=MAFK PE=1 SV=1	O60675	2.3e-109	100%	311.997	156	156
P53350	PLK1_HUMANSerine threonine- kinase PLK1 OS=Homo sapiens OX=9606 GN=PLK1 PE=1 SV=1	603	sp|P53350|PLK1_HUMANSerine/threonine-protein kinase PLK1 OS=Homo sapiens OX=9606 GN=PLK1 PE=1 SV=1	P53350	0	100%	1246.49	603	603
Q9Y5V0	ZN706_HUMANZinc finger 706 OS=Homo sapiens OX=9606 GN=ZNF706 PE=1 SV=1	76	sp|Q9Y5V0|ZN706_HUMANZinc finger protein 706 OS=Homo sapiens OX=9606 GN=ZNF706 PE=1 SV=1	Q9Y5V0	1.9e-49	100%	153.295	76	76
P62805	H4_HUMANHistone H4 OS=Homo sapiens OX=9606 GN=H4C1 PE=1 SV=2	103	sp|P62805|H4_HUMANHistone H4 OS=Homo sapiens OX=9606 GN=H4C1 PE=1 SV=2	P62805	4.4e-67	100%	200.29	103	103
Q71DI3	H32_HUMANHistone OS=Homo sapiens OX=9606 GN=H3C15 PE=1 SV=3	136	sp|Q71DI3|H32_HUMANHistone H3.2 OS=Homo sapiens OX=9606 GN=H3C15 PE=1 SV=3	Q71DI3	2.4e-95	100%	274.633	136	136
O60870	KIN17_HUMANDNA RNA-binding KIN17 OS=Homo sapiens OX=9606 GN=KIN PE=1 SV=2	393	sp|O60870|KIN17_HUMANDNA/RNA-binding protein KIN17 OS=Homo sapiens OX=9606 GN=KIN PE=1 SV=2	O60870	0	100%	811.601	393	393
P07305	H10_HUMANHistone OS=Homo sapiens OX=9606 GN=H1-0 PE=1 SV=3	194	sp|P07305|H10_HUMANHistone H1.0 OS=Homo sapiens OX=9606 GN=H1-0 PE=1 SV=3	P07305	6.2e-125	100%	354.369	194	194
Q99848	EBP2_HUMANProbable rRNA-processing EBP2 OS=Homo sapiens OX=9606 GN=EBNA1BP2 PE=1 SV=2	306	sp|Q99848|EBP2_HUMANProbable rRNA-processing protein EBP2 OS=Homo sapiens OX=9606 GN=EBNA1BP2 PE=1 SV=2	Q99848	0	100%	624.009	306	306
Q8IYL3	CA174_HUMANUPF0688 C1orf174 OS=Homo sapiens OX=9606 GN=C1orf174 PE=1 SV=2	243	sp|Q8IYL3|CA174_HUMANUPF0688 protein C1orf174 OS=Homo sapiens OX=9606 GN=C1orf174 PE=1 SV=2	Q8IYL3	2.8e-177	100%	491.115	243	243
Q9BX40	LS14B_HUMAN LSM14 homolog B OS=Homo sapiens OX=9606 GN=LSM14B PE=1 SV=1	385	sp|Q9BX40|LS14B_HUMANProtein LSM14 homolog B OS=Homo sapiens OX=9606 GN=LSM14B PE=1 SV=1	Q9BX40	0	100%	788.104	385	385
Q9BV57	MTND_HUMAN1,2-dihydroxy-3-keto-5-methylthiopentene dioxygenase OS=Homo sapiens OX=9606 GN=ADI1 PE=1 SV=1	179	sp|Q9BV57|MTND_HUMAN1,2-dihydroxy-3-keto-5-methylthiopentene dioxygenase OS=Homo sapiens OX=9606 GN=ADI1 PE=1 SV=1	Q9BV57	2.7e-132	100%	372.089	179	179
A6NHL2	TBAL3_HUMANTubulin alpha chain-like 3 OS=Homo sapiens OX=9606 GN=TUBAL3 PE=1 SV=2	446	sp|A6NHL2|TBAL3_HUMANTubulin alpha chain-like 3 OS=Homo sapiens OX=9606 GN=TUBAL3 PE=1 SV=2	A6NHL2	0	100%	936.021	446	446
Q99933	BAG1_HUMANBAG family molecular chaperone regulator 1 OS=Homo sapiens OX=9606 GN=BAG1 PE=1 SV=4	345	sp|Q99933|BAG1_HUMANBAG family molecular chaperone regulator 1 OS=Homo sapiens OX=9606 GN=BAG1 PE=1 SV=4	Q99933	0	100%	692.96	345	345
Q8WUW1	BRK1_HUMAN BRICK1 OS=Homo sapiens OX=9606 GN=BRK1 PE=1 SV=1	75	sp|Q8WUW1|BRK1_HUMANProtein BRICK1 OS=Homo sapiens OX=9606 GN=BRK1 PE=1 SV=1	Q8WUW1	1.9e-50	100%	155.992	75	75
Q9Y3E7	CHMP3_HUMANCharged multivesicular body 3 OS=Homo sapiens OX=9606 GN=CHMP3 PE=1 SV=3	222	sp|Q9Y3E7|CHMP3_HUMANCharged multivesicular body protein 3 OS=Homo sapiens OX=9606 GN=CHMP3 PE=1 SV=3	Q9Y3E7	1.3e-157	100%	439.884	222	222
Q9NR30	DDX21_HUMANNucleolar RNA helicase 2 OS=Homo sapiens OX=9606 GN=DDX21 PE=1 SV=5	783	sp|Q9NR30|DDX21_HUMANNucleolar RNA helicase 2 OS=Homo sapiens OX=9606 GN=DDX21 PE=1 SV=5	Q9NR30	0	100%	1607.42	783	783
Q6UWP2	DHR11_HUMANDehydrogenase reductase SDR family member 11 OS=Homo sapiens OX=9606 GN=DHRS11 PE=1 SV=1	260	sp|Q6UWP2|DHR11_HUMANDehydrogenase/reductase SDR family member 11 OS=Homo sapiens OX=9606 GN=DHRS11 PE=1 SV=1	Q6UWP2	0	100%	543.117	260	260
Q9Y6E2	BZW2_HUMANBasic leucine zipper and W2 domain-containing 2 OS=Homo sapiens OX=9606 GN=BZW2 PE=1 SV=1	419	sp|Q9Y6E2|BZW2_HUMANBasic leucine zipper and W2 domain-containing protein 2 OS=Homo sapiens OX=9606 GN=BZW2 PE=1 SV=1	Q9Y6E2	0	100%	860.907	419	419
Q6DN03	H2B2C_HUMAN histone H2B type 2-C OS=Homo sapiens OX=9606 GN=H2BC20P PE=5 SV=3	193	sp|Q6DN03|H2B2C_HUMANPutative histone H2B type 2-C OS=Homo sapiens OX=9606 GN=H2BC20P PE=5 SV=3	Q6DN03	3.2e-140	100%	393.275	193	193
Q9BWE0	REPI1_HUMANReplication initiator 1 OS=Homo sapiens OX=9606 GN=REPIN1 PE=1 SV=1	567	sp|Q9BWE0|REPI1_HUMANReplication initiator 1 OS=Homo sapiens OX=9606 GN=REPIN1 PE=1 SV=1	Q9BWE0	0	100%	1134.78	567	567
P49759	CLK1_HUMANDual specificity kinase CLK1 OS=Homo sapiens OX=9606 GN=CLK1 PE=1 SV=2	484	sp|P49759|CLK1_HUMANDual specificity protein kinase CLK1 OS=Homo sapiens OX=9606 GN=CLK1 PE=1 SV=2	P49759	0	100%	1007.28	484	484
Q9UNQ2	DIM1_HUMANProbable dimethyladenosine transferase OS=Homo sapiens OX=9606 GN=DIMT1 PE=1 SV=1	313	sp|Q9UNQ2|DIM1_HUMANProbable dimethyladenosine transferase OS=Homo sapiens OX=9606 GN=DIMT1 PE=1 SV=1	Q9UNQ2	0	100%	640.573	313	313
Q92766	RREB1_HUMANRas-responsive element-binding 1 OS=Homo sapiens OX=9606 GN=RREB1 PE=1 SV=3	1687	sp|Q92766|RREB1_HUMANRas-responsive element-binding protein 1 OS=Homo sapiens OX=9606 GN=RREB1 PE=1 SV=3	Q92766	0	100%	3445.98	1687	1687
Q9Y2Z9	COQ6_HUMANUbiquinone biosynthesis monooxygenase mitochondrial OS=Homo sapiens OX=9606 GN=COQ6 PE=1 SV=2	468	sp|Q9Y2Z9|COQ6_HUMANUbiquinone biosynthesis monooxygenase COQ6, mitochondrial OS=Homo sapiens OX=9606 GN=COQ6 PE=1 SV=2	Q9Y2Z9	0	100%	962.6	468	468
Q9BQG0	MBB1A_HUMANMyb-binding 1A OS=Homo sapiens OX=9606 GN=MYBBP1A PE=1 SV=2	1328	sp|Q9BQG0|MBB1A_HUMANMyb-binding protein 1A OS=Homo sapiens OX=9606 GN=MYBBP1A PE=1 SV=2	Q9BQG0	0	100%	2707.94	1328	1328
Q92688	AN32B_HUMANAcidic leucine-rich nuclear phospho 32 family member B OS=Homo sapiens OX=9606 GN=ANP32B PE=1 SV=1	251	sp|Q92688|AN32B_HUMANAcidic leucine-rich nuclear phosphoprotein 32 family member B OS=Homo sapiens OX=9606 GN=ANP32B PE=1 SV=1	Q92688	2.5e-169	100%	471.855	251	251
P15407	FOSL1_HUMANFos-related antigen 1 OS=Homo sapiens OX=9606 GN=FOSL1 PE=1 SV=1	271	sp|P15407|FOSL1_HUMANFos-related antigen 1 OS=Homo sapiens OX=9606 GN=FOSL1 PE=1 SV=1	P15407	0	100%	541.576	271	271
Q8IUF8	RIOX2_HUMANRibosomal oxygenase 2 OS=Homo sapiens OX=9606 GN=RIOX2 PE=1 SV=1	465	sp|Q8IUF8|RIOX2_HUMANRibosomal oxygenase 2 OS=Homo sapiens OX=9606 GN=RIOX2 PE=1 SV=1	Q8IUF8	0	100%	964.526	465	465
Q6PL18	ATAD2_HUMANATPase family AAA domain-containing 2 OS=Homo sapiens OX=9606 GN=ATAD2 PE=1 SV=1	1390	sp|Q6PL18|ATAD2_HUMANATPase family AAA domain-containing protein 2 OS=Homo sapiens OX=9606 GN=ATAD2 PE=1 SV=1	Q6PL18	0	100%	2877.43	1390	1390
P07477	TRY1_HUMANTrypsin-1 OS=Homo sapiens OX=9606 GN=PRSS1 PE=1 SV=1	247	sp|P07477|TRY1_HUMANTrypsin-1 OS=Homo sapiens OX=9606 GN=PRSS1 PE=1 SV=1	P07477	0	100%	512.686	247	247
P28347	TEAD1_HUMANTranscriptional enhancer factor TEF-1 OS=Homo sapiens OX=9606 GN=TEAD1 PE=1 SV=2	426	sp|P28347|TEAD1_HUMANTranscriptional enhancer factor TEF-1 OS=Homo sapiens OX=9606 GN=TEAD1 PE=1 SV=2	P28347	0	100%	897.886	426	426
Q9ULW0	TPX2_HUMANTargeting for Xklp2 OS=Homo sapiens OX=9606 GN=TPX2 PE=1 SV=2	747	sp|Q9ULW0|TPX2_HUMANTargeting protein for Xklp2 OS=Homo sapiens OX=9606 GN=TPX2 PE=1 SV=2	Q9ULW0	0	100%	1515.36	747	747
Q92522	H1X_HUMANHistone OS=Homo sapiens OX=9606 GN=H1-10 PE=1 SV=1	213	sp|Q92522|H1X_HUMANHistone H1.10 OS=Homo sapiens OX=9606 GN=H1-10 PE=1 SV=1	Q92522	2.7e-147	100%	412.92	213	213
P00533	EGFR_HUMANEpidermal growth factor receptor OS=Homo sapiens OX=9606 GN=EGFR PE=1 SV=2	1210	sp|P00533|EGFR_HUMANEpidermal growth factor receptor OS=Homo sapiens OX=9606 GN=EGFR PE=1 SV=2	P00533	0	100%	2523.43	1210	1210
P68431	H31_HUMANHistone OS=Homo sapiens OX=9606 GN=H3C1 PE=1 SV=2	136	sp|P68431|H31_HUMANHistone H3.1 OS=Homo sapiens OX=9606 GN=H3C1 PE=1 SV=2	P68431	1.2e-95	100%	275.404	136	136
Q96T88	UHRF1_HUMANE3 ubiquitin- ligase UHRF1 OS=Homo sapiens OX=9606 GN=UHRF1 PE=1 SV=1	793	sp|Q96T88|UHRF1_HUMANE3 ubiquitin-protein ligase UHRF1 OS=Homo sapiens OX=9606 GN=UHRF1 PE=1 SV=1	Q96T88	0	100%	1654.03	793	793
P00918	CAH2_HUMANCarbonic anhydrase 2 OS=Homo sapiens OX=9606 GN=CA2 PE=1 SV=2	260	sp|P00918|CAH2_HUMANCarbonic anhydrase 2 OS=Homo sapiens OX=9606 GN=CA2 PE=1 SV=2	P00918	0	100%	536.569	260	260
O95235	KI20A_HUMANKinesin KIF20A OS=Homo sapiens OX=9606 GN=KIF20A PE=1 SV=1	890	sp|O95235|KI20A_HUMANKinesin-like protein KIF20A OS=Homo sapiens OX=9606 GN=KIF20A PE=1 SV=1	O95235	0	100%	1832	890	890
Q96FF9	CDCA5_HUMANSororin OS=Homo sapiens OX=9606 GN=CDCA5 PE=1 SV=1	252	sp|Q96FF9|CDCA5_HUMANSororin OS=Homo sapiens OX=9606 GN=CDCA5 PE=1 SV=1	Q96FF9	2.4e-180	100%	499.975	252	252
Q5TEZ5	CF163_HUMANUncharacterized protein C6orf163 OS=Homo sapiens OX=9606 GN=C6orf163 PE=4 SV=2	329	sp|Q5TEZ5|CF163_HUMANUncharacterized protein C6orf163 OS=Homo sapiens OX=9606 GN=C6orf163 PE=4 SV=2	Q5TEZ5	0	100%	676.781	329	329
Q8IUE6	H2A2B_HUMANHistone H2A type 2-B OS=Homo sapiens OX=9606 GN=H2AC21 PE=1 SV=3	130	sp|Q8IUE6|H2A2B_HUMANHistone H2A type 2-B OS=Homo sapiens OX=9606 GN=H2AC21 PE=1 SV=3	Q8IUE6	1.4e-88	100%	256.914	130	130
P50502	F10A1_HUMANHsc70-interacting OS=Homo sapiens OX=9606 GN=ST13 PE=1 SV=2	369	sp|P50502|F10A1_HUMANHsc70-interacting protein OS=Homo sapiens OX=9606 GN=ST13 PE=1 SV=2	P50502	0	100%	755.747	369	369
Q9Y324	FCF1_HUMA -processing FCF1 homolog OS=Homo sapiens OX=9606 GN=FCF1 PE=1 SV=1	198	sp|Q9Y324|FCF1_HUMANrRNA-processing protein FCF1 homolog OS=Homo sapiens OX=9606 GN=FCF1 PE=1 SV=1	Q9Y324	4e-146	100%	408.683	198	198
Q53GA4	PHLA2_HUMANPleckstrin homology-like domain family A member 2 OS=Homo sapiens OX=9606 GN=PHLDA2 PE=1 SV=2	152	sp|Q53GA4|PHLA2_HUMANPleckstrin homology-like domain family A member 2 OS=Homo sapiens OX=9606 GN=PHLDA2 PE=1 SV=2	Q53GA4	3.6e-108	100%	308.531	152	152
Q9UNW9	NOVA2_HUMANRNA-binding Nova-2 OS=Homo sapiens OX=9606 GN=NOVA2 PE=1 SV=1	492	sp|Q9UNW9|NOVA2_HUMANRNA-binding protein Nova-2 OS=Homo sapiens OX=9606 GN=NOVA2 PE=1 SV=1	Q9UNW9	0	100%	958.362	492	492
P15531	NDKA_HUMANNucleoside diphosphate kinase A OS=Homo sapiens OX=9606 GN=NME1 PE=1 SV=1	152	sp|P15531|NDKA_HUMANNucleoside diphosphate kinase A OS=Homo sapiens OX=9606 GN=NME1 PE=1 SV=1	P15531	8.4e-112	100%	317.775	152	152
Q6FI13	H2A2A_HUMANHistone H2A type 2-A OS=Homo sapiens OX=9606 GN=H2AC18 PE=1 SV=3	130	sp|Q6FI13|H2A2A_HUMANHistone H2A type 2-A OS=Homo sapiens OX=9606 GN=H2AC18 PE=1 SV=3	Q6FI13	3.3e-89	100%	258.84	130	130
Q15147	PLCB4_HUMAN1-phosphatidylinositol 4,5-bisphosphate phosphodiesterase beta-4 OS=Homo sapiens OX=9606 GN=PLCB4 PE=1 SV=3	1175	sp|Q15147|PLCB4_HUMAN1-phosphatidylinositol 4,5-bisphosphate phosphodiesterase beta-4 OS=Homo sapiens OX=9606 GN=PLCB4 PE=1 SV=3	Q15147	0	100%	2456.4	1175	1175
P04818	TYSY_HUMANThymidylate synthase OS=Homo sapiens OX=9606 GN=TYMS PE=1 SV=3	313	sp|P04818|TYSY_HUMANThymidylate synthase OS=Homo sapiens OX=9606 GN=TYMS PE=1 SV=3	P04818	0	100%	652.129	313	313
P10412	H14_HUMANHistone OS=Homo sapiens OX=9606 GN=H1-4 PE=1 SV=2	219	sp|P10412|H14_HUMANHistone H1.4 OS=Homo sapiens OX=9606 GN=H1-4 PE=1 SV=2	P10412	3.4e-127	100%	362.459	219	219
P42025	ACTY_HUMANBeta-centractin OS=Homo sapiens OX=9606 GN=ACTR1B PE=1 SV=1	376	sp|P42025|ACTY_HUMANBeta-centractin OS=Homo sapiens OX=9606 GN=ACTR1B PE=1 SV=1	P42025	0	100%	778.474	376	376
P16403	H12_HUMANHistone OS=Homo sapiens OX=9606 GN=H1-2 PE=1 SV=2	213	sp|P16403|H12_HUMANHistone H1.2 OS=Homo sapiens OX=9606 GN=H1-2 PE=1 SV=2	P16403	9.3e-127	100%	360.533	213	213
Q9H939	PPIP2_HUMANProline-serine-threonine phosphatase-interacting 2 OS=Homo sapiens OX=9606 GN=PSTPIP2 PE=1 SV=4	334	sp|Q9H939|PPIP2_HUMANProline-serine-threonine phosphatase-interacting protein 2 OS=Homo sapiens OX=9606 GN=PSTPIP2 PE=1 SV=4	Q9H939	0	100%	697.967	334	334
Q9BXS6	NUSAP_HUMANNucleolar and spindle-associated 1 OS=Homo sapiens OX=9606 GN=NUSAP1 PE=1 SV=1	441	sp|Q9BXS6|NUSAP_HUMANNucleolar and spindle-associated protein 1 OS=Homo sapiens OX=9606 GN=NUSAP1 PE=1 SV=1	Q9BXS6	0	100%	906.36	441	441
Q58FF6	H90B4_HUMAN heat shock HSP 90-beta 4 OS=Homo sapiens OX=9606 GN=HSP90AB4P PE=5 SV=1	505	sp|Q58FF6|H90B4_HUMANPutative heat shock protein HSP 90-beta 4 OS=Homo sapiens OX=9606 GN=HSP90AB4P PE=5 SV=1	Q58FF6	0	100%	1030.39	505	505
Q96F63	CCD97_HUMANCoiled-coil domain-containing 97 OS=Homo sapiens OX=9606 GN=CCDC97 PE=1 SV=1	343	sp|Q96F63|CCD97_HUMANCoiled-coil domain-containing protein 97 OS=Homo sapiens OX=9606 GN=CCDC97 PE=1 SV=1	Q96F63	0	100%	697.197	343	343
O00767	ACOD_HUMANAcyl- desaturase OS=Homo sapiens OX=9606 GN=SCD PE=1 SV=2	359	sp|O00767|ACOD_HUMANAcyl-CoA desaturase OS=Homo sapiens OX=9606 GN=SCD PE=1 SV=2	O00767	0	100%	748.429	359	359
Q16533	SNPC1_HUMA -activating complex subunit 1 OS=Homo sapiens OX=9606 GN=SNAPC1 PE=1 SV=1	368	sp|Q16533|SNPC1_HUMANsnRNA-activating protein complex subunit 1 OS=Homo sapiens OX=9606 GN=SNAPC1 PE=1 SV=1	Q16533	0	100%	768.074	368	368

## Sheet: protein2go
SeqName	Hit-Desc	GO-Group	GO-ID	GO-Term
P02795	MT2_HUMANMetallothionein-2 OS=Homo sapiens OX=9606 GN=MT2A PE=1 SV=1	C	GO:0005634	nucleus
P02795	MT2_HUMANMetallothionein-2 OS=Homo sapiens OX=9606 GN=MT2A PE=1 SV=1	C	GO:0005829	cytosol
P02795	MT2_HUMANMetallothionein-2 OS=Homo sapiens OX=9606 GN=MT2A PE=1 SV=1	C	GO:0048471	perinuclear region of cytoplasm
P02795	MT2_HUMANMetallothionein-2 OS=Homo sapiens OX=9606 GN=MT2A PE=1 SV=1	F	GO:0005515	protein binding
P02795	MT2_HUMANMetallothionein-2 OS=Homo sapiens OX=9606 GN=MT2A PE=1 SV=1	F	GO:0008144	drug binding
P02795	MT2_HUMANMetallothionein-2 OS=Homo sapiens OX=9606 GN=MT2A PE=1 SV=1	F	GO:0008270	zinc ion binding
P02795	MT2_HUMANMetallothionein-2 OS=Homo sapiens OX=9606 GN=MT2A PE=1 SV=1	P	GO:0006878	cellular copper ion homeostasis
P02795	MT2_HUMANMetallothionein-2 OS=Homo sapiens OX=9606 GN=MT2A PE=1 SV=1	P	GO:0006882	cellular zinc ion homeostasis
P02795	MT2_HUMANMetallothionein-2 OS=Homo sapiens OX=9606 GN=MT2A PE=1 SV=1	P	GO:0007263	nitric oxide mediated signal transduction
P02795	MT2_HUMANMetallothionein-2 OS=Homo sapiens OX=9606 GN=MT2A PE=1 SV=1	P	GO:0009617	response to bacterium
P02795	MT2_HUMANMetallothionein-2 OS=Homo sapiens OX=9606 GN=MT2A PE=1 SV=1	P	GO:0010273	detoxification of copper ion
P02795	MT2_HUMANMetallothionein-2 OS=Homo sapiens OX=9606 GN=MT2A PE=1 SV=1	P	GO:0030224	monocyte differentiation
P02795	MT2_HUMANMetallothionein-2 OS=Homo sapiens OX=9606 GN=MT2A PE=1 SV=1	P	GO:0035690	cellular response to drug
P02795	MT2_HUMANMetallothionein-2 OS=Homo sapiens OX=9606 GN=MT2A PE=1 SV=1	P	GO:0035924	cellular response to vascular endothelial growth factor stimulus
P02795	MT2_HUMANMetallothionein-2 OS=Homo sapiens OX=9606 GN=MT2A PE=1 SV=1	P	GO:0036016	cellular response to interleukin-3
P02795	MT2_HUMANMetallothionein-2 OS=Homo sapiens OX=9606 GN=MT2A PE=1 SV=1	P	GO:0036018	cellular response to erythropoietin
P02795	MT2_HUMANMetallothionein-2 OS=Homo sapiens OX=9606 GN=MT2A PE=1 SV=1	P	GO:0042117	monocyte activation
P02795	MT2_HUMANMetallothionein-2 OS=Homo sapiens OX=9606 GN=MT2A PE=1 SV=1	P	GO:0045926	negative regulation of growth
P02795	MT2_HUMANMetallothionein-2 OS=Homo sapiens OX=9606 GN=MT2A PE=1 SV=1	P	GO:0060333	interferon-gamma-mediated signaling pathway
P02795	MT2_HUMANMetallothionein-2 OS=Homo sapiens OX=9606 GN=MT2A PE=1 SV=1	P	GO:0071276	cellular response to cadmium ion
P02795	MT2_HUMANMetallothionein-2 OS=Homo sapiens OX=9606 GN=MT2A PE=1 SV=1	P	GO:0071280	cellular response to copper ion
P02795	MT2_HUMANMetallothionein-2 OS=Homo sapiens OX=9606 GN=MT2A PE=1 SV=1	P	GO:0071294	cellular response to zinc ion
P52926	HMGA2_HUMANHigh mobility group HMGI-C OS=Homo sapiens OX=9606 GN=HMGA2 PE=1 SV=1	C	GO:0000228	nuclear chromosome
P52926	HMGA2_HUMANHigh mobility group HMGI-C OS=Homo sapiens OX=9606 GN=HMGA2 PE=1 SV=1	C	GO:0005654	nucleoplasm
P52926	HMGA2_HUMANHigh mobility group HMGI-C OS=Homo sapiens OX=9606 GN=HMGA2 PE=1 SV=1	C	GO:0005829	cytosol
P52926	HMGA2_HUMANHigh mobility group HMGI-C OS=Homo sapiens OX=9606 GN=HMGA2 PE=1 SV=1	C	GO:0032993	protein-DNA complex
P52926	HMGA2_HUMANHigh mobility group HMGI-C OS=Homo sapiens OX=9606 GN=HMGA2 PE=1 SV=1	C	GO:0035985	senescence-associated heterochromatin focus
P52926	HMGA2_HUMANHigh mobility group HMGI-C OS=Homo sapiens OX=9606 GN=HMGA2 PE=1 SV=1	C	GO:0071141	SMAD protein complex
P52926	HMGA2_HUMANHigh mobility group HMGI-C OS=Homo sapiens OX=9606 GN=HMGA2 PE=1 SV=1	F	GO:0001227	DNA-binding transcription repressor activity, RNA polymerase II-specific
P52926	HMGA2_HUMANHigh mobility group HMGI-C OS=Homo sapiens OX=9606 GN=HMGA2 PE=1 SV=1	F	GO:0001228	DNA-binding transcription activator activity, RNA polymerase II-specific
P52926	HMGA2_HUMANHigh mobility group HMGI-C OS=Homo sapiens OX=9606 GN=HMGA2 PE=1 SV=1	F	GO:0003680	AT DNA binding
P52926	HMGA2_HUMANHigh mobility group HMGI-C OS=Homo sapiens OX=9606 GN=HMGA2 PE=1 SV=1	F	GO:0003712	transcription coregulator activity
P52926	HMGA2_HUMANHigh mobility group HMGI-C OS=Homo sapiens OX=9606 GN=HMGA2 PE=1 SV=1	F	GO:0003906	DNA-(apurinic or apyrimidinic site) endonuclease activity
P52926	HMGA2_HUMANHigh mobility group HMGI-C OS=Homo sapiens OX=9606 GN=HMGA2 PE=1 SV=1	F	GO:0008301	DNA binding, bending
P52926	HMGA2_HUMANHigh mobility group HMGI-C OS=Homo sapiens OX=9606 GN=HMGA2 PE=1 SV=1	F	GO:0031492	nucleosomal DNA binding
P52926	HMGA2_HUMANHigh mobility group HMGI-C OS=Homo sapiens OX=9606 GN=HMGA2 PE=1 SV=1	F	GO:0035497	cAMP response element binding
P52926	HMGA2_HUMANHigh mobility group HMGI-C OS=Homo sapiens OX=9606 GN=HMGA2 PE=1 SV=1	F	GO:0035500	MH2 domain binding
P52926	HMGA2_HUMANHigh mobility group HMGI-C OS=Homo sapiens OX=9606 GN=HMGA2 PE=1 SV=1	F	GO:0035501	MH1 domain binding
P52926	HMGA2_HUMANHigh mobility group HMGI-C OS=Homo sapiens OX=9606 GN=HMGA2 PE=1 SV=1	F	GO:0046332	SMAD binding
P52926	HMGA2_HUMANHigh mobility group HMGI-C OS=Homo sapiens OX=9606 GN=HMGA2 PE=1 SV=1	F	GO:0046965	retinoid X receptor binding
P52926	HMGA2_HUMANHigh mobility group HMGI-C OS=Homo sapiens OX=9606 GN=HMGA2 PE=1 SV=1	F	GO:0051575	5'-deoxyribose-5-phosphate lyase activity
P52926	HMGA2_HUMANHigh mobility group HMGI-C OS=Homo sapiens OX=9606 GN=HMGA2 PE=1 SV=1	F	GO:0070742	C2H2 zinc finger domain binding
P52926	HMGA2_HUMANHigh mobility group HMGI-C OS=Homo sapiens OX=9606 GN=HMGA2 PE=1 SV=1	P	GO:0000122	negative regulation of transcription by RNA polymerase II
P52926	HMGA2_HUMANHigh mobility group HMGI-C OS=Homo sapiens OX=9606 GN=HMGA2 PE=1 SV=1	P	GO:0001837	epithelial to mesenchymal transition
P52926	HMGA2_HUMANHigh mobility group HMGI-C OS=Homo sapiens OX=9606 GN=HMGA2 PE=1 SV=1	P	GO:0002062	chondrocyte differentiation
P52926	HMGA2_HUMANHigh mobility group HMGI-C OS=Homo sapiens OX=9606 GN=HMGA2 PE=1 SV=1	P	GO:0003131	mesodermal-endodermal cell signaling
P52926	HMGA2_HUMANHigh mobility group HMGI-C OS=Homo sapiens OX=9606 GN=HMGA2 PE=1 SV=1	P	GO:0006284	base-excision repair
P52926	HMGA2_HUMANHigh mobility group HMGI-C OS=Homo sapiens OX=9606 GN=HMGA2 PE=1 SV=1	P	GO:0007095	mitotic G2 DNA damage checkpoint
P52926	HMGA2_HUMANHigh mobility group HMGI-C OS=Homo sapiens OX=9606 GN=HMGA2 PE=1 SV=1	P	GO:0009615	response to virus
P52926	HMGA2_HUMANHigh mobility group HMGI-C OS=Homo sapiens OX=9606 GN=HMGA2 PE=1 SV=1	P	GO:0030261	chromosome condensation
P52926	HMGA2_HUMANHigh mobility group HMGI-C OS=Homo sapiens OX=9606 GN=HMGA2 PE=1 SV=1	P	GO:0031052	chromosome breakage
P52926	HMGA2_HUMANHigh mobility group HMGI-C OS=Homo sapiens OX=9606 GN=HMGA2 PE=1 SV=1	P	GO:0035978	histone H2A-S139 phosphorylation
P52926	HMGA2_HUMANHigh mobility group HMGI-C OS=Homo sapiens OX=9606 GN=HMGA2 PE=1 SV=1	P	GO:0035986	senescence-associated heterochromatin focus assembly
P52926	HMGA2_HUMANHigh mobility group HMGI-C OS=Homo sapiens OX=9606 GN=HMGA2 PE=1 SV=1	P	GO:0035987	endodermal cell differentiation
P52926	HMGA2_HUMANHigh mobility group HMGI-C OS=Homo sapiens OX=9606 GN=HMGA2 PE=1 SV=1	P	GO:0035988	chondrocyte proliferation
P52926	HMGA2_HUMANHigh mobility group HMGI-C OS=Homo sapiens OX=9606 GN=HMGA2 PE=1 SV=1	P	GO:0040008	regulation of growth
P52926	HMGA2_HUMANHigh mobility group HMGI-C OS=Homo sapiens OX=9606 GN=HMGA2 PE=1 SV=1	P	GO:0042769	DNA damage response, detection of DNA damage
P52926	HMGA2_HUMANHigh mobility group HMGI-C OS=Homo sapiens OX=9606 GN=HMGA2 PE=1 SV=1	P	GO:0043065	positive regulation of apoptotic process
P52926	HMGA2_HUMANHigh mobility group HMGI-C OS=Homo sapiens OX=9606 GN=HMGA2 PE=1 SV=1	P	GO:0043066	negative regulation of apoptotic process
P52926	HMGA2_HUMANHigh mobility group HMGI-C OS=Homo sapiens OX=9606 GN=HMGA2 PE=1 SV=1	P	GO:0043392	negative regulation of DNA binding
P52926	HMGA2_HUMANHigh mobility group HMGI-C OS=Homo sapiens OX=9606 GN=HMGA2 PE=1 SV=1	P	GO:0043922	negative regulation by host of viral transcription
P52926	HMGA2_HUMANHigh mobility group HMGI-C OS=Homo sapiens OX=9606 GN=HMGA2 PE=1 SV=1	P	GO:0045444	fat cell differentiation
P52926	HMGA2_HUMANHigh mobility group HMGI-C OS=Homo sapiens OX=9606 GN=HMGA2 PE=1 SV=1	P	GO:0045766	positive regulation of angiogenesis
P52926	HMGA2_HUMANHigh mobility group HMGI-C OS=Homo sapiens OX=9606 GN=HMGA2 PE=1 SV=1	P	GO:0045869	negative regulation of single stranded viral RNA replication via double stranded DNA intermediate
P52926	HMGA2_HUMANHigh mobility group HMGI-C OS=Homo sapiens OX=9606 GN=HMGA2 PE=1 SV=1	P	GO:0045944	positive regulation of transcription by RNA polymerase II
P52926	HMGA2_HUMANHigh mobility group HMGI-C OS=Homo sapiens OX=9606 GN=HMGA2 PE=1 SV=1	P	GO:0048333	mesodermal cell differentiation
P52926	HMGA2_HUMANHigh mobility group HMGI-C OS=Homo sapiens OX=9606 GN=HMGA2 PE=1 SV=1	P	GO:0048863	stem cell differentiation
P52926	HMGA2_HUMANHigh mobility group HMGI-C OS=Homo sapiens OX=9606 GN=HMGA2 PE=1 SV=1	P	GO:0051301	cell division
P52926	HMGA2_HUMANHigh mobility group HMGI-C OS=Homo sapiens OX=9606 GN=HMGA2 PE=1 SV=1	P	GO:0071158	positive regulation of cell cycle arrest
P52926	HMGA2_HUMANHigh mobility group HMGI-C OS=Homo sapiens OX=9606 GN=HMGA2 PE=1 SV=1	P	GO:0071864	positive regulation of cell proliferation in bone marrow
P52926	HMGA2_HUMANHigh mobility group HMGI-C OS=Homo sapiens OX=9606 GN=HMGA2 PE=1 SV=1	P	GO:0071902	positive regulation of protein serine/threonine kinase activity
P52926	HMGA2_HUMANHigh mobility group HMGI-C OS=Homo sapiens OX=9606 GN=HMGA2 PE=1 SV=1	P	GO:0075713	establishment of integrated proviral latency
P52926	HMGA2_HUMANHigh mobility group HMGI-C OS=Homo sapiens OX=9606 GN=HMGA2 PE=1 SV=1	P	GO:0090402	oncogene-induced cell senescence
P52926	HMGA2_HUMANHigh mobility group HMGI-C OS=Homo sapiens OX=9606 GN=HMGA2 PE=1 SV=1	P	GO:2000036	regulation of stem cell population maintenance
P52926	HMGA2_HUMANHigh mobility group HMGI-C OS=Homo sapiens OX=9606 GN=HMGA2 PE=1 SV=1	P	GO:2000648	positive regulation of stem cell proliferation
P52926	HMGA2_HUMANHigh mobility group HMGI-C OS=Homo sapiens OX=9606 GN=HMGA2 PE=1 SV=1	P	GO:2000679	positive regulation of transcription regulatory region DNA binding
P52926	HMGA2_HUMANHigh mobility group HMGI-C OS=Homo sapiens OX=9606 GN=HMGA2 PE=1 SV=1	P	GO:2000685	positive regulation of cellular response to X-ray
P52926	HMGA2_HUMANHigh mobility group HMGI-C OS=Homo sapiens OX=9606 GN=HMGA2 PE=1 SV=1	P	GO:2000773	negative regulation of cellular senescence
P52926	HMGA2_HUMANHigh mobility group HMGI-C OS=Homo sapiens OX=9606 GN=HMGA2 PE=1 SV=1	P	GO:2000774	positive regulation of cellular senescence
P52926	HMGA2_HUMANHigh mobility group HMGI-C OS=Homo sapiens OX=9606 GN=HMGA2 PE=1 SV=1	P	GO:2001022	positive regulation of response to DNA damage stimulus
P52926	HMGA2_HUMANHigh mobility group HMGI-C OS=Homo sapiens OX=9606 GN=HMGA2 PE=1 SV=1	P	GO:2001033	negative regulation of double-strand break repair via nonhomologous end joining
P52926	HMGA2_HUMANHigh mobility group HMGI-C OS=Homo sapiens OX=9606 GN=HMGA2 PE=1 SV=1	P	GO:2001038	regulation of cellular response to drug
P52926	HMGA2_HUMANHigh mobility group HMGI-C OS=Homo sapiens OX=9606 GN=HMGA2 PE=1 SV=1	C	GO:0005667	transcription factor complex
P52926	HMGA2_HUMANHigh mobility group HMGI-C OS=Homo sapiens OX=9606 GN=HMGA2 PE=1 SV=1	P	GO:0045449	regulation of transcription, DNA-templated
P52926	HMGA2_HUMANHigh mobility group HMGI-C OS=Homo sapiens OX=9606 GN=HMGA2 PE=1 SV=1	P	GO:0007165	signal transduction
P05121	PAI1_HUMANPlasminogen activator inhibitor 1 OS=Homo sapiens OX=9606 GN=SERPINE1 PE=1 SV=1	C	GO:0005615	extracellular space
P05121	PAI1_HUMANPlasminogen activator inhibitor 1 OS=Homo sapiens OX=9606 GN=SERPINE1 PE=1 SV=1	C	GO:0005829	cytosol
P05121	PAI1_HUMANPlasminogen activator inhibitor 1 OS=Homo sapiens OX=9606 GN=SERPINE1 PE=1 SV=1	C	GO:0031091	platelet alpha granule
P05121	PAI1_HUMANPlasminogen activator inhibitor 1 OS=Homo sapiens OX=9606 GN=SERPINE1 PE=1 SV=1	C	GO:0043025	neuronal cell body
P05121	PAI1_HUMANPlasminogen activator inhibitor 1 OS=Homo sapiens OX=9606 GN=SERPINE1 PE=1 SV=1	C	GO:0060205	cytoplasmic vesicle lumen
P05121	PAI1_HUMANPlasminogen activator inhibitor 1 OS=Homo sapiens OX=9606 GN=SERPINE1 PE=1 SV=1	C	GO:0062023	collagen-containing extracellular matrix
P05121	PAI1_HUMANPlasminogen activator inhibitor 1 OS=Homo sapiens OX=9606 GN=SERPINE1 PE=1 SV=1	F	GO:0002020	protease binding
P05121	PAI1_HUMANPlasminogen activator inhibitor 1 OS=Homo sapiens OX=9606 GN=SERPINE1 PE=1 SV=1	F	GO:0004867	serine-type endopeptidase inhibitor activity
P05121	PAI1_HUMANPlasminogen activator inhibitor 1 OS=Homo sapiens OX=9606 GN=SERPINE1 PE=1 SV=1	F	GO:0005102	signaling receptor binding
P05121	PAI1_HUMANPlasminogen activator inhibitor 1 OS=Homo sapiens OX=9606 GN=SERPINE1 PE=1 SV=1	P	GO:0002576	platelet degranulation
P05121	PAI1_HUMANPlasminogen activator inhibitor 1 OS=Homo sapiens OX=9606 GN=SERPINE1 PE=1 SV=1	P	GO:0007623	circadian rhythm
P05121	PAI1_HUMANPlasminogen activator inhibitor 1 OS=Homo sapiens OX=9606 GN=SERPINE1 PE=1 SV=1	P	GO:0010466	negative regulation of peptidase activity
P05121	PAI1_HUMANPlasminogen activator inhibitor 1 OS=Homo sapiens OX=9606 GN=SERPINE1 PE=1 SV=1	P	GO:0010757	negative regulation of plasminogen activation
P05121	PAI1_HUMANPlasminogen activator inhibitor 1 OS=Homo sapiens OX=9606 GN=SERPINE1 PE=1 SV=1	P	GO:0030194	positive regulation of blood coagulation
P05121	PAI1_HUMANPlasminogen activator inhibitor 1 OS=Homo sapiens OX=9606 GN=SERPINE1 PE=1 SV=1	P	GO:0030198	extracellular matrix organization
P05121	PAI1_HUMANPlasminogen activator inhibitor 1 OS=Homo sapiens OX=9606 GN=SERPINE1 PE=1 SV=1	P	GO:0030336	negative regulation of cell migration
P05121	PAI1_HUMANPlasminogen activator inhibitor 1 OS=Homo sapiens OX=9606 GN=SERPINE1 PE=1 SV=1	P	GO:0032757	positive regulation of interleukin-8 production
P05121	PAI1_HUMANPlasminogen activator inhibitor 1 OS=Homo sapiens OX=9606 GN=SERPINE1 PE=1 SV=1	P	GO:0033629	negative regulation of cell adhesion mediated by integrin
P05121	PAI1_HUMANPlasminogen activator inhibitor 1 OS=Homo sapiens OX=9606 GN=SERPINE1 PE=1 SV=1	P	GO:0042730	fibrinolysis
P05121	PAI1_HUMANPlasminogen activator inhibitor 1 OS=Homo sapiens OX=9606 GN=SERPINE1 PE=1 SV=1	P	GO:0048711	positive regulation of astrocyte differentiation
P05121	PAI1_HUMANPlasminogen activator inhibitor 1 OS=Homo sapiens OX=9606 GN=SERPINE1 PE=1 SV=1	P	GO:0050729	positive regulation of inflammatory response
P05121	PAI1_HUMANPlasminogen activator inhibitor 1 OS=Homo sapiens OX=9606 GN=SERPINE1 PE=1 SV=1	P	GO:0050829	defense response to Gram-negative bacterium
P05121	PAI1_HUMANPlasminogen activator inhibitor 1 OS=Homo sapiens OX=9606 GN=SERPINE1 PE=1 SV=1	P	GO:0097187	dentinogenesis
P05121	PAI1_HUMANPlasminogen activator inhibitor 1 OS=Homo sapiens OX=9606 GN=SERPINE1 PE=1 SV=1	P	GO:1901331	positive regulation of odontoblast differentiation
P05121	PAI1_HUMANPlasminogen activator inhibitor 1 OS=Homo sapiens OX=9606 GN=SERPINE1 PE=1 SV=1	P	GO:1902042	negative regulation of extrinsic apoptotic signaling pathway via death domain receptors
P05121	PAI1_HUMANPlasminogen activator inhibitor 1 OS=Homo sapiens OX=9606 GN=SERPINE1 PE=1 SV=1	P	GO:2000098	negative regulation of smooth muscle cell-matrix adhesion
P05121	PAI1_HUMANPlasminogen activator inhibitor 1 OS=Homo sapiens OX=9606 GN=SERPINE1 PE=1 SV=1	P	GO:2000352	negative regulation of endothelial cell apoptotic process
O15075	DCLK1_HUMANSerine threonine- kinase DCLK1 OS=Homo sapiens OX=9606 GN=DCLK1 PE=1 SV=2	C	GO:0001650	fibrillar center
O15075	DCLK1_HUMANSerine threonine- kinase DCLK1 OS=Homo sapiens OX=9606 GN=DCLK1 PE=1 SV=2	C	GO:0005654	nucleoplasm
O15075	DCLK1_HUMANSerine threonine- kinase DCLK1 OS=Homo sapiens OX=9606 GN=DCLK1 PE=1 SV=2	C	GO:0005829	cytosol
O15075	DCLK1_HUMANSerine threonine- kinase DCLK1 OS=Homo sapiens OX=9606 GN=DCLK1 PE=1 SV=2	C	GO:0005874	microtubule
O15075	DCLK1_HUMANSerine threonine- kinase DCLK1 OS=Homo sapiens OX=9606 GN=DCLK1 PE=1 SV=2	C	GO:0005875	microtubule associated complex
O15075	DCLK1_HUMANSerine threonine- kinase DCLK1 OS=Homo sapiens OX=9606 GN=DCLK1 PE=1 SV=2	C	GO:0005887	integral component of plasma membrane
O15075	DCLK1_HUMANSerine threonine- kinase DCLK1 OS=Homo sapiens OX=9606 GN=DCLK1 PE=1 SV=2	C	GO:0005930	axoneme
O15075	DCLK1_HUMANSerine threonine- kinase DCLK1 OS=Homo sapiens OX=9606 GN=DCLK1 PE=1 SV=2	C	GO:0005954	calcium- and calmodulin-dependent protein kinase complex
O15075	DCLK1_HUMANSerine threonine- kinase DCLK1 OS=Homo sapiens OX=9606 GN=DCLK1 PE=1 SV=2	C	GO:0012505	endomembrane system
O15075	DCLK1_HUMANSerine threonine- kinase DCLK1 OS=Homo sapiens OX=9606 GN=DCLK1 PE=1 SV=2	C	GO:0014069	postsynaptic density
O15075	DCLK1_HUMANSerine threonine- kinase DCLK1 OS=Homo sapiens OX=9606 GN=DCLK1 PE=1 SV=2	C	GO:0030666	endocytic vesicle membrane
O15075	DCLK1_HUMANSerine threonine- kinase DCLK1 OS=Homo sapiens OX=9606 GN=DCLK1 PE=1 SV=2	C	GO:0043005	neuron projection
O15075	DCLK1_HUMANSerine threonine- kinase DCLK1 OS=Homo sapiens OX=9606 GN=DCLK1 PE=1 SV=2	F	GO:0004683	calmodulin-dependent protein kinase activity
O15075	DCLK1_HUMANSerine threonine- kinase DCLK1 OS=Homo sapiens OX=9606 GN=DCLK1 PE=1 SV=2	F	GO:0005524	ATP binding
O15075	DCLK1_HUMANSerine threonine- kinase DCLK1 OS=Homo sapiens OX=9606 GN=DCLK1 PE=1 SV=2	F	GO:0008017	microtubule binding
O15075	DCLK1_HUMANSerine threonine- kinase DCLK1 OS=Homo sapiens OX=9606 GN=DCLK1 PE=1 SV=2	F	GO:0019901	protein kinase binding
O15075	DCLK1_HUMANSerine threonine- kinase DCLK1 OS=Homo sapiens OX=9606 GN=DCLK1 PE=1 SV=2	F	GO:0042803	protein homodimerization activity
O15075	DCLK1_HUMANSerine threonine- kinase DCLK1 OS=Homo sapiens OX=9606 GN=DCLK1 PE=1 SV=2	P	GO:0001764	neuron migration
O15075	DCLK1_HUMANSerine threonine- kinase DCLK1 OS=Homo sapiens OX=9606 GN=DCLK1 PE=1 SV=2	P	GO:0002372	myeloid dendritic cell cytokine production
O15075	DCLK1_HUMANSerine threonine- kinase DCLK1 OS=Homo sapiens OX=9606 GN=DCLK1 PE=1 SV=2	P	GO:0007616	long-term memory
O15075	DCLK1_HUMANSerine threonine- kinase DCLK1 OS=Homo sapiens OX=9606 GN=DCLK1 PE=1 SV=2	P	GO:0009615	response to virus
O15075	DCLK1_HUMANSerine threonine- kinase DCLK1 OS=Homo sapiens OX=9606 GN=DCLK1 PE=1 SV=2	P	GO:0014733	regulation of skeletal muscle adaptation
O15075	DCLK1_HUMANSerine threonine- kinase DCLK1 OS=Homo sapiens OX=9606 GN=DCLK1 PE=1 SV=2	P	GO:0016197	endosomal transport
O15075	DCLK1_HUMANSerine threonine- kinase DCLK1 OS=Homo sapiens OX=9606 GN=DCLK1 PE=1 SV=2	P	GO:0021766	hippocampus development
O15075	DCLK1_HUMANSerine threonine- kinase DCLK1 OS=Homo sapiens OX=9606 GN=DCLK1 PE=1 SV=2	P	GO:0021860	pyramidal neuron development
O15075	DCLK1_HUMANSerine threonine- kinase DCLK1 OS=Homo sapiens OX=9606 GN=DCLK1 PE=1 SV=2	P	GO:0021952	central nervous system projection neuron axonogenesis
O15075	DCLK1_HUMANSerine threonine- kinase DCLK1 OS=Homo sapiens OX=9606 GN=DCLK1 PE=1 SV=2	P	GO:0032091	negative regulation of protein binding
O15075	DCLK1_HUMANSerine threonine- kinase DCLK1 OS=Homo sapiens OX=9606 GN=DCLK1 PE=1 SV=2	P	GO:0032793	positive regulation of CREB transcription factor activity
O15075	DCLK1_HUMANSerine threonine- kinase DCLK1 OS=Homo sapiens OX=9606 GN=DCLK1 PE=1 SV=2	P	GO:0033138	positive regulation of peptidyl-serine phosphorylation
O15075	DCLK1_HUMANSerine threonine- kinase DCLK1 OS=Homo sapiens OX=9606 GN=DCLK1 PE=1 SV=2	P	GO:0035082	axoneme assembly
O15075	DCLK1_HUMANSerine threonine- kinase DCLK1 OS=Homo sapiens OX=9606 GN=DCLK1 PE=1 SV=2	P	GO:0035556	intracellular signal transduction
O15075	DCLK1_HUMANSerine threonine- kinase DCLK1 OS=Homo sapiens OX=9606 GN=DCLK1 PE=1 SV=2	P	GO:0042461	photoreceptor cell development
O15075	DCLK1_HUMANSerine threonine- kinase DCLK1 OS=Homo sapiens OX=9606 GN=DCLK1 PE=1 SV=2	P	GO:0043011	myeloid dendritic cell differentiation
O15075	DCLK1_HUMANSerine threonine- kinase DCLK1 OS=Homo sapiens OX=9606 GN=DCLK1 PE=1 SV=2	P	GO:0045944	positive regulation of transcription by RNA polymerase II
O15075	DCLK1_HUMANSerine threonine- kinase DCLK1 OS=Homo sapiens OX=9606 GN=DCLK1 PE=1 SV=2	P	GO:0046827	positive regulation of protein export from nucleus
O15075	DCLK1_HUMANSerine threonine- kinase DCLK1 OS=Homo sapiens OX=9606 GN=DCLK1 PE=1 SV=2	P	GO:0048675	axon extension
O15075	DCLK1_HUMANSerine threonine- kinase DCLK1 OS=Homo sapiens OX=9606 GN=DCLK1 PE=1 SV=2	P	GO:0048813	dendrite morphogenesis
O15075	DCLK1_HUMANSerine threonine- kinase DCLK1 OS=Homo sapiens OX=9606 GN=DCLK1 PE=1 SV=2	P	GO:0050766	positive regulation of phagocytosis
O15075	DCLK1_HUMANSerine threonine- kinase DCLK1 OS=Homo sapiens OX=9606 GN=DCLK1 PE=1 SV=2	P	GO:0051149	positive regulation of muscle cell differentiation
O15075	DCLK1_HUMANSerine threonine- kinase DCLK1 OS=Homo sapiens OX=9606 GN=DCLK1 PE=1 SV=2	P	GO:0051835	positive regulation of synapse structural plasticity
O15075	DCLK1_HUMANSerine threonine- kinase DCLK1 OS=Homo sapiens OX=9606 GN=DCLK1 PE=1 SV=2	P	GO:0051924	regulation of calcium ion transport
O15075	DCLK1_HUMANSerine threonine- kinase DCLK1 OS=Homo sapiens OX=9606 GN=DCLK1 PE=1 SV=2	P	GO:0060041	retina development in camera-type eye
O15075	DCLK1_HUMANSerine threonine- kinase DCLK1 OS=Homo sapiens OX=9606 GN=DCLK1 PE=1 SV=2	P	GO:0060143	positive regulation of syncytium formation by plasma membrane fusion
O15075	DCLK1_HUMANSerine threonine- kinase DCLK1 OS=Homo sapiens OX=9606 GN=DCLK1 PE=1 SV=2	P	GO:0060267	positive regulation of respiratory burst
O15075	DCLK1_HUMANSerine threonine- kinase DCLK1 OS=Homo sapiens OX=9606 GN=DCLK1 PE=1 SV=2	P	GO:0060999	positive regulation of dendritic spine development
O15075	DCLK1_HUMANSerine threonine- kinase DCLK1 OS=Homo sapiens OX=9606 GN=DCLK1 PE=1 SV=2	P	GO:0071622	regulation of granulocyte chemotaxis
O15075	DCLK1_HUMANSerine threonine- kinase DCLK1 OS=Homo sapiens OX=9606 GN=DCLK1 PE=1 SV=2	P	GO:0071902	positive regulation of protein serine/threonine kinase activity
O15075	DCLK1_HUMANSerine threonine- kinase DCLK1 OS=Homo sapiens OX=9606 GN=DCLK1 PE=1 SV=2	P	GO:1900181	negative regulation of protein localization to nucleus
O15075	DCLK1_HUMANSerine threonine- kinase DCLK1 OS=Homo sapiens OX=9606 GN=DCLK1 PE=1 SV=2	P	GO:1901985	positive regulation of protein acetylation
O15075	DCLK1_HUMANSerine threonine- kinase DCLK1 OS=Homo sapiens OX=9606 GN=DCLK1 PE=1 SV=2	P	GO:1902105	regulation of leukocyte differentiation
O15075	DCLK1_HUMANSerine threonine- kinase DCLK1 OS=Homo sapiens OX=9606 GN=DCLK1 PE=1 SV=2	P	GO:2000615	regulation of histone H3-K9 acetylation
O15075	DCLK1_HUMANSerine threonine- kinase DCLK1 OS=Homo sapiens OX=9606 GN=DCLK1 PE=1 SV=2	P	GO:0009069	serine family amino acid metabolic process
O15075	DCLK1_HUMANSerine threonine- kinase DCLK1 OS=Homo sapiens OX=9606 GN=DCLK1 PE=1 SV=2	C	GO:0045298	tubulin complex
P04732	MT1E_HUMANMetallothionein-1E OS=Homo sapiens OX=9606 GN=MT1E PE=1 SV=1	C	GO:0005634	nucleus
P04732	MT1E_HUMANMetallothionein-1E OS=Homo sapiens OX=9606 GN=MT1E PE=1 SV=1	C	GO:0005829	cytosol
P04732	MT1E_HUMANMetallothionein-1E OS=Homo sapiens OX=9606 GN=MT1E PE=1 SV=1	C	GO:0048471	perinuclear region of cytoplasm
P04732	MT1E_HUMANMetallothionein-1E OS=Homo sapiens OX=9606 GN=MT1E PE=1 SV=1	F	GO:0005515	protein binding
P04732	MT1E_HUMANMetallothionein-1E OS=Homo sapiens OX=9606 GN=MT1E PE=1 SV=1	F	GO:0008144	drug binding
P04732	MT1E_HUMANMetallothionein-1E OS=Homo sapiens OX=9606 GN=MT1E PE=1 SV=1	F	GO:0008270	zinc ion binding
P04732	MT1E_HUMANMetallothionein-1E OS=Homo sapiens OX=9606 GN=MT1E PE=1 SV=1	P	GO:0006878	cellular copper ion homeostasis
P04732	MT1E_HUMANMetallothionein-1E OS=Homo sapiens OX=9606 GN=MT1E PE=1 SV=1	P	GO:0006882	cellular zinc ion homeostasis
P04732	MT1E_HUMANMetallothionein-1E OS=Homo sapiens OX=9606 GN=MT1E PE=1 SV=1	P	GO:0007263	nitric oxide mediated signal transduction
P04732	MT1E_HUMANMetallothionein-1E OS=Homo sapiens OX=9606 GN=MT1E PE=1 SV=1	P	GO:0009617	response to bacterium
P04732	MT1E_HUMANMetallothionein-1E OS=Homo sapiens OX=9606 GN=MT1E PE=1 SV=1	P	GO:0010273	detoxification of copper ion
P04732	MT1E_HUMANMetallothionein-1E OS=Homo sapiens OX=9606 GN=MT1E PE=1 SV=1	P	GO:0030224	monocyte differentiation
P04732	MT1E_HUMANMetallothionein-1E OS=Homo sapiens OX=9606 GN=MT1E PE=1 SV=1	P	GO:0035690	cellular response to drug
P04732	MT1E_HUMANMetallothionein-1E OS=Homo sapiens OX=9606 GN=MT1E PE=1 SV=1	P	GO:0035924	cellular response to vascular endothelial growth factor stimulus
P04732	MT1E_HUMANMetallothionein-1E OS=Homo sapiens OX=9606 GN=MT1E PE=1 SV=1	P	GO:0036016	cellular response to interleukin-3
P04732	MT1E_HUMANMetallothionein-1E OS=Homo sapiens OX=9606 GN=MT1E PE=1 SV=1	P	GO:0036018	cellular response to erythropoietin
P04732	MT1E_HUMANMetallothionein-1E OS=Homo sapiens OX=9606 GN=MT1E PE=1 SV=1	P	GO:0042117	monocyte activation
P04732	MT1E_HUMANMetallothionein-1E OS=Homo sapiens OX=9606 GN=MT1E PE=1 SV=1	P	GO:0045926	negative regulation of growth
P04732	MT1E_HUMANMetallothionein-1E OS=Homo sapiens OX=9606 GN=MT1E PE=1 SV=1	P	GO:0060333	interferon-gamma-mediated signaling pathway
P04732	MT1E_HUMANMetallothionein-1E OS=Homo sapiens OX=9606 GN=MT1E PE=1 SV=1	P	GO:0071276	cellular response to cadmium ion
P04732	MT1E_HUMANMetallothionein-1E OS=Homo sapiens OX=9606 GN=MT1E PE=1 SV=1	P	GO:0071280	cellular response to copper ion
P04732	MT1E_HUMANMetallothionein-1E OS=Homo sapiens OX=9606 GN=MT1E PE=1 SV=1	P	GO:0071294	cellular response to zinc ion
Q01628	IFM3_HUMANInterferon-induced transmembrane 3 OS=Homo sapiens OX=9606 GN=IFITM3 PE=1 SV=2	C	GO:0005765	lysosomal membrane
Q01628	IFM3_HUMANInterferon-induced transmembrane 3 OS=Homo sapiens OX=9606 GN=IFITM3 PE=1 SV=2	C	GO:0005887	integral component of plasma membrane
Q01628	IFM3_HUMANInterferon-induced transmembrane 3 OS=Homo sapiens OX=9606 GN=IFITM3 PE=1 SV=2	C	GO:0031902	late endosome membrane
Q01628	IFM3_HUMANInterferon-induced transmembrane 3 OS=Homo sapiens OX=9606 GN=IFITM3 PE=1 SV=2	C	GO:0032991	protein-containing complex
Q01628	IFM3_HUMANInterferon-induced transmembrane 3 OS=Homo sapiens OX=9606 GN=IFITM3 PE=1 SV=2	C	GO:0098793	presynapse
Q01628	IFM3_HUMANInterferon-induced transmembrane 3 OS=Homo sapiens OX=9606 GN=IFITM3 PE=1 SV=2	F	GO:0005515	protein binding
Q01628	IFM3_HUMANInterferon-induced transmembrane 3 OS=Homo sapiens OX=9606 GN=IFITM3 PE=1 SV=2	P	GO:0030282	bone mineralization
Q01628	IFM3_HUMANInterferon-induced transmembrane 3 OS=Homo sapiens OX=9606 GN=IFITM3 PE=1 SV=2	P	GO:0032897	negative regulation of viral transcription
Q01628	IFM3_HUMANInterferon-induced transmembrane 3 OS=Homo sapiens OX=9606 GN=IFITM3 PE=1 SV=2	P	GO:0034341	response to interferon-gamma
Q01628	IFM3_HUMANInterferon-induced transmembrane 3 OS=Homo sapiens OX=9606 GN=IFITM3 PE=1 SV=2	P	GO:0035455	response to interferon-alpha
Q01628	IFM3_HUMANInterferon-induced transmembrane 3 OS=Homo sapiens OX=9606 GN=IFITM3 PE=1 SV=2	P	GO:0035456	response to interferon-beta
Q01628	IFM3_HUMANInterferon-induced transmembrane 3 OS=Homo sapiens OX=9606 GN=IFITM3 PE=1 SV=2	P	GO:0045071	negative regulation of viral genome replication
Q01628	IFM3_HUMANInterferon-induced transmembrane 3 OS=Homo sapiens OX=9606 GN=IFITM3 PE=1 SV=2	P	GO:0046597	negative regulation of viral entry into host cell
Q01628	IFM3_HUMANInterferon-induced transmembrane 3 OS=Homo sapiens OX=9606 GN=IFITM3 PE=1 SV=2	P	GO:0051607	defense response to virus
Q01628	IFM3_HUMANInterferon-induced transmembrane 3 OS=Homo sapiens OX=9606 GN=IFITM3 PE=1 SV=2	P	GO:0060337	type I interferon signaling pathway
Q01628	IFM3_HUMANInterferon-induced transmembrane 3 OS=Homo sapiens OX=9606 GN=IFITM3 PE=1 SV=2	P	GO:0060349	bone morphogenesis
P52566	GDIR2_HUMANRho GDP-dissociation inhibitor 2 OS=Homo sapiens OX=9606 GN=ARHGDIB PE=1 SV=3	C	GO:0005829	cytosol
P52566	GDIR2_HUMANRho GDP-dissociation inhibitor 2 OS=Homo sapiens OX=9606 GN=ARHGDIB PE=1 SV=3	C	GO:0005856	cytoskeleton
P52566	GDIR2_HUMANRho GDP-dissociation inhibitor 2 OS=Homo sapiens OX=9606 GN=ARHGDIB PE=1 SV=3	C	GO:0005886	plasma membrane
P52566	GDIR2_HUMANRho GDP-dissociation inhibitor 2 OS=Homo sapiens OX=9606 GN=ARHGDIB PE=1 SV=3	C	GO:0031410	cytoplasmic vesicle
P52566	GDIR2_HUMANRho GDP-dissociation inhibitor 2 OS=Homo sapiens OX=9606 GN=ARHGDIB PE=1 SV=3	F	GO:0003924	GTPase activity
P52566	GDIR2_HUMANRho GDP-dissociation inhibitor 2 OS=Homo sapiens OX=9606 GN=ARHGDIB PE=1 SV=3	F	GO:0005094	Rho GDP-dissociation inhibitor activity
P52566	GDIR2_HUMANRho GDP-dissociation inhibitor 2 OS=Homo sapiens OX=9606 GN=ARHGDIB PE=1 SV=3	F	GO:0005096	GTPase activator activity
P52566	GDIR2_HUMANRho GDP-dissociation inhibitor 2 OS=Homo sapiens OX=9606 GN=ARHGDIB PE=1 SV=3	F	GO:0048365	Rac GTPase binding
P52566	GDIR2_HUMANRho GDP-dissociation inhibitor 2 OS=Homo sapiens OX=9606 GN=ARHGDIB PE=1 SV=3	P	GO:0007162	negative regulation of cell adhesion
P52566	GDIR2_HUMANRho GDP-dissociation inhibitor 2 OS=Homo sapiens OX=9606 GN=ARHGDIB PE=1 SV=3	P	GO:0035023	regulation of Rho protein signal transduction
P52566	GDIR2_HUMANRho GDP-dissociation inhibitor 2 OS=Homo sapiens OX=9606 GN=ARHGDIB PE=1 SV=3	P	GO:0043066	negative regulation of apoptotic process
P52566	GDIR2_HUMANRho GDP-dissociation inhibitor 2 OS=Homo sapiens OX=9606 GN=ARHGDIB PE=1 SV=3	P	GO:0043547	positive regulation of GTPase activity
P52566	GDIR2_HUMANRho GDP-dissociation inhibitor 2 OS=Homo sapiens OX=9606 GN=ARHGDIB PE=1 SV=3	P	GO:0050772	positive regulation of axonogenesis
P52566	GDIR2_HUMANRho GDP-dissociation inhibitor 2 OS=Homo sapiens OX=9606 GN=ARHGDIB PE=1 SV=3	P	GO:0071461	cellular response to redox state
P52566	GDIR2_HUMANRho GDP-dissociation inhibitor 2 OS=Homo sapiens OX=9606 GN=ARHGDIB PE=1 SV=3	P	GO:0071526	semaphorin-plexin signaling pathway
P52566	GDIR2_HUMANRho GDP-dissociation inhibitor 2 OS=Homo sapiens OX=9606 GN=ARHGDIB PE=1 SV=3	P	GO:1901164	negative regulation of trophoblast cell migration
P52566	GDIR2_HUMANRho GDP-dissociation inhibitor 2 OS=Homo sapiens OX=9606 GN=ARHGDIB PE=1 SV=3	P	GO:2000249	regulation of actin cytoskeleton reorganization
Q8IVF2	AHNK2_HUMAN AHNAK2 OS=Homo sapiens OX=9606 GN=AHNAK2 PE=1 SV=2	C	GO:0005634	nucleus
Q8IVF2	AHNK2_HUMAN AHNAK2 OS=Homo sapiens OX=9606 GN=AHNAK2 PE=1 SV=2	C	GO:0005829	cytosol
Q8IVF2	AHNK2_HUMAN AHNAK2 OS=Homo sapiens OX=9606 GN=AHNAK2 PE=1 SV=2	C	GO:0030018	Z disc
Q8IVF2	AHNK2_HUMAN AHNAK2 OS=Homo sapiens OX=9606 GN=AHNAK2 PE=1 SV=2	C	GO:0030054	cell junction
Q8IVF2	AHNK2_HUMAN AHNAK2 OS=Homo sapiens OX=9606 GN=AHNAK2 PE=1 SV=2	C	GO:0030315	T-tubule
Q8IVF2	AHNK2_HUMAN AHNAK2 OS=Homo sapiens OX=9606 GN=AHNAK2 PE=1 SV=2	C	GO:0030659	cytoplasmic vesicle membrane
Q8IVF2	AHNK2_HUMAN AHNAK2 OS=Homo sapiens OX=9606 GN=AHNAK2 PE=1 SV=2	C	GO:0043034	costamere
Q8IVF2	AHNK2_HUMAN AHNAK2 OS=Homo sapiens OX=9606 GN=AHNAK2 PE=1 SV=2	F	GO:0005515	protein binding
Q8IVF2	AHNK2_HUMAN AHNAK2 OS=Homo sapiens OX=9606 GN=AHNAK2 PE=1 SV=2	P	GO:0001778	plasma membrane repair
Q8IVF2	AHNK2_HUMAN AHNAK2 OS=Homo sapiens OX=9606 GN=AHNAK2 PE=1 SV=2	P	GO:0043484	regulation of RNA splicing
Q9BXT2	CCG6_HUMANVoltage-dependent calcium channel gamma-6 subunit OS=Homo sapiens OX=9606 GN=CACNG6 PE=1 SV=1	C	GO:1990454	L-type voltage-gated calcium channel complex
Q9BXT2	CCG6_HUMANVoltage-dependent calcium channel gamma-6 subunit OS=Homo sapiens OX=9606 GN=CACNG6 PE=1 SV=1	F	GO:0005245	voltage-gated calcium channel activity
Q9BXT2	CCG6_HUMANVoltage-dependent calcium channel gamma-6 subunit OS=Homo sapiens OX=9606 GN=CACNG6 PE=1 SV=1	F	GO:0005246	calcium channel regulator activity
Q9BXT2	CCG6_HUMANVoltage-dependent calcium channel gamma-6 subunit OS=Homo sapiens OX=9606 GN=CACNG6 PE=1 SV=1	F	GO:0005515	protein binding
Q9BXT2	CCG6_HUMANVoltage-dependent calcium channel gamma-6 subunit OS=Homo sapiens OX=9606 GN=CACNG6 PE=1 SV=1	P	GO:0034765	regulation of ion transmembrane transport
Q9BXT2	CCG6_HUMANVoltage-dependent calcium channel gamma-6 subunit OS=Homo sapiens OX=9606 GN=CACNG6 PE=1 SV=1	P	GO:0061337	cardiac conduction
Q9BXT2	CCG6_HUMANVoltage-dependent calcium channel gamma-6 subunit OS=Homo sapiens OX=9606 GN=CACNG6 PE=1 SV=1	P	GO:0070588	calcium ion transmembrane transport
O75326	SEM7A_HUMANSemaphorin-7A OS=Homo sapiens OX=9606 GN=SEMA7A PE=1 SV=1	C	GO:0005615	extracellular space
O75326	SEM7A_HUMANSemaphorin-7A OS=Homo sapiens OX=9606 GN=SEMA7A PE=1 SV=1	C	GO:0009897	external side of plasma membrane
O75326	SEM7A_HUMANSemaphorin-7A OS=Homo sapiens OX=9606 GN=SEMA7A PE=1 SV=1	F	GO:0030215	semaphorin receptor binding
O75326	SEM7A_HUMANSemaphorin-7A OS=Homo sapiens OX=9606 GN=SEMA7A PE=1 SV=1	P	GO:0007229	integrin-mediated signaling pathway
O75326	SEM7A_HUMANSemaphorin-7A OS=Homo sapiens OX=9606 GN=SEMA7A PE=1 SV=1	P	GO:0007411	axon guidance
O75326	SEM7A_HUMANSemaphorin-7A OS=Homo sapiens OX=9606 GN=SEMA7A PE=1 SV=1	P	GO:0021675	nerve development
O75326	SEM7A_HUMANSemaphorin-7A OS=Homo sapiens OX=9606 GN=SEMA7A PE=1 SV=1	P	GO:0021988	olfactory lobe development
O75326	SEM7A_HUMANSemaphorin-7A OS=Homo sapiens OX=9606 GN=SEMA7A PE=1 SV=1	P	GO:0030335	positive regulation of cell migration
O75326	SEM7A_HUMANSemaphorin-7A OS=Homo sapiens OX=9606 GN=SEMA7A PE=1 SV=1	P	GO:0031324	negative regulation of cellular metabolic process
O75326	SEM7A_HUMANSemaphorin-7A OS=Homo sapiens OX=9606 GN=SEMA7A PE=1 SV=1	P	GO:0045596	negative regulation of cell differentiation
O75326	SEM7A_HUMANSemaphorin-7A OS=Homo sapiens OX=9606 GN=SEMA7A PE=1 SV=1	P	GO:0045773	positive regulation of axon extension
O75326	SEM7A_HUMANSemaphorin-7A OS=Homo sapiens OX=9606 GN=SEMA7A PE=1 SV=1	P	GO:0048483	autonomic nervous system development
O75326	SEM7A_HUMANSemaphorin-7A OS=Homo sapiens OX=9606 GN=SEMA7A PE=1 SV=1	P	GO:0048646	anatomical structure formation involved in morphogenesis
O75326	SEM7A_HUMANSemaphorin-7A OS=Homo sapiens OX=9606 GN=SEMA7A PE=1 SV=1	P	GO:0048762	mesenchymal cell differentiation
O75326	SEM7A_HUMANSemaphorin-7A OS=Homo sapiens OX=9606 GN=SEMA7A PE=1 SV=1	P	GO:0050727	regulation of inflammatory response
O75326	SEM7A_HUMANSemaphorin-7A OS=Homo sapiens OX=9606 GN=SEMA7A PE=1 SV=1	P	GO:0051241	negative regulation of multicellular organismal process
O75326	SEM7A_HUMANSemaphorin-7A OS=Homo sapiens OX=9606 GN=SEMA7A PE=1 SV=1	P	GO:0060907	positive regulation of macrophage cytokine production
O75326	SEM7A_HUMANSemaphorin-7A OS=Homo sapiens OX=9606 GN=SEMA7A PE=1 SV=1	P	GO:0070374	positive regulation of ERK1 and ERK2 cascade
O75326	SEM7A_HUMANSemaphorin-7A OS=Homo sapiens OX=9606 GN=SEMA7A PE=1 SV=1	P	GO:0071526	semaphorin-plexin signaling pathway
O75326	SEM7A_HUMANSemaphorin-7A OS=Homo sapiens OX=9606 GN=SEMA7A PE=1 SV=1	P	GO:0072359	circulatory system development
Q9NS25	SPNXB_HUMANSperm associated with the nucleus on the X chromosome B1 OS=Homo sapiens OX=9606 GN=SPANXB1 PE=1 SV=2	C	GO:0005634	nucleus
Q9NS25	SPNXB_HUMANSperm associated with the nucleus on the X chromosome B1 OS=Homo sapiens OX=9606 GN=SPANXB1 PE=1 SV=2	C	GO:0005737	cytoplasm
Q9NS25	SPNXB_HUMANSperm associated with the nucleus on the X chromosome B1 OS=Homo sapiens OX=9606 GN=SPANXB1 PE=1 SV=2	P	GO:0007286	spermatid development
Q9Y653	AGRG1_HUMANAdhesion G- coupled receptor G1 OS=Homo sapiens OX=9606 GN=ADGRG1 PE=1 SV=2	C	GO:0005576	extracellular region
Q9Y653	AGRG1_HUMANAdhesion G- coupled receptor G1 OS=Homo sapiens OX=9606 GN=ADGRG1 PE=1 SV=2	C	GO:0005887	integral component of plasma membrane
Q9Y653	AGRG1_HUMANAdhesion G- coupled receptor G1 OS=Homo sapiens OX=9606 GN=ADGRG1 PE=1 SV=2	C	GO:0043226	organelle
Q9Y653	AGRG1_HUMANAdhesion G- coupled receptor G1 OS=Homo sapiens OX=9606 GN=ADGRG1 PE=1 SV=2	C	GO:0045121	membrane raft
Q9Y653	AGRG1_HUMANAdhesion G- coupled receptor G1 OS=Homo sapiens OX=9606 GN=ADGRG1 PE=1 SV=2	C	GO:0097451	glial limiting end-foot
Q9Y653	AGRG1_HUMANAdhesion G- coupled receptor G1 OS=Homo sapiens OX=9606 GN=ADGRG1 PE=1 SV=2	C	GO:0097458	neuron part
Q9Y653	AGRG1_HUMANAdhesion G- coupled receptor G1 OS=Homo sapiens OX=9606 GN=ADGRG1 PE=1 SV=2	F	GO:0004930	G protein-coupled receptor activity
Q9Y653	AGRG1_HUMANAdhesion G- coupled receptor G1 OS=Homo sapiens OX=9606 GN=ADGRG1 PE=1 SV=2	F	GO:0005515	protein binding
Q9Y653	AGRG1_HUMANAdhesion G- coupled receptor G1 OS=Homo sapiens OX=9606 GN=ADGRG1 PE=1 SV=2	F	GO:0005518	collagen binding
Q9Y653	AGRG1_HUMANAdhesion G- coupled receptor G1 OS=Homo sapiens OX=9606 GN=ADGRG1 PE=1 SV=2	F	GO:0008201	heparin binding
Q9Y653	AGRG1_HUMANAdhesion G- coupled receptor G1 OS=Homo sapiens OX=9606 GN=ADGRG1 PE=1 SV=2	F	GO:0050840	extracellular matrix binding
Q9Y653	AGRG1_HUMANAdhesion G- coupled receptor G1 OS=Homo sapiens OX=9606 GN=ADGRG1 PE=1 SV=2	P	GO:0001525	angiogenesis
Q9Y653	AGRG1_HUMANAdhesion G- coupled receptor G1 OS=Homo sapiens OX=9606 GN=ADGRG1 PE=1 SV=2	P	GO:0007166	cell surface receptor signaling pathway
Q9Y653	AGRG1_HUMANAdhesion G- coupled receptor G1 OS=Homo sapiens OX=9606 GN=ADGRG1 PE=1 SV=2	P	GO:0007189	adenylate cyclase-activating G protein-coupled receptor signaling pathway
Q9Y653	AGRG1_HUMANAdhesion G- coupled receptor G1 OS=Homo sapiens OX=9606 GN=ADGRG1 PE=1 SV=2	P	GO:0007267	cell-cell signaling
Q9Y653	AGRG1_HUMANAdhesion G- coupled receptor G1 OS=Homo sapiens OX=9606 GN=ADGRG1 PE=1 SV=2	P	GO:0008285	negative regulation of cell population proliferation
Q9Y653	AGRG1_HUMANAdhesion G- coupled receptor G1 OS=Homo sapiens OX=9606 GN=ADGRG1 PE=1 SV=2	P	GO:0010573	vascular endothelial growth factor production
Q9Y653	AGRG1_HUMANAdhesion G- coupled receptor G1 OS=Homo sapiens OX=9606 GN=ADGRG1 PE=1 SV=2	P	GO:0021796	cerebral cortex regionalization
Q9Y653	AGRG1_HUMANAdhesion G- coupled receptor G1 OS=Homo sapiens OX=9606 GN=ADGRG1 PE=1 SV=2	P	GO:0021819	layer formation in cerebral cortex
Q9Y653	AGRG1_HUMANAdhesion G- coupled receptor G1 OS=Homo sapiens OX=9606 GN=ADGRG1 PE=1 SV=2	P	GO:0035025	positive regulation of Rho protein signal transduction
Q9Y653	AGRG1_HUMANAdhesion G- coupled receptor G1 OS=Homo sapiens OX=9606 GN=ADGRG1 PE=1 SV=2	P	GO:0045785	positive regulation of cell adhesion
Q9Y653	AGRG1_HUMANAdhesion G- coupled receptor G1 OS=Homo sapiens OX=9606 GN=ADGRG1 PE=1 SV=2	P	GO:0070528	protein kinase C signaling
Q9Y653	AGRG1_HUMANAdhesion G- coupled receptor G1 OS=Homo sapiens OX=9606 GN=ADGRG1 PE=1 SV=2	P	GO:0072520	seminiferous tubule development
Q9Y653	AGRG1_HUMANAdhesion G- coupled receptor G1 OS=Homo sapiens OX=9606 GN=ADGRG1 PE=1 SV=2	P	GO:2000179	positive regulation of neural precursor cell proliferation
Q9Y653	AGRG1_HUMANAdhesion G- coupled receptor G1 OS=Homo sapiens OX=9606 GN=ADGRG1 PE=1 SV=2	P	GO:2001223	negative regulation of neuron migration
Q9Y653	AGRG1_HUMANAdhesion G- coupled receptor G1 OS=Homo sapiens OX=9606 GN=ADGRG1 PE=1 SV=2	C	GO:0005581	collagen trimer
Q96K17	BT3L4_HUMANTranscription factor BTF3 homolog 4 OS=Homo sapiens OX=9606 GN=BTF3L4 PE=1 SV=1	C	GO:0005634	nucleus
Q96K17	BT3L4_HUMANTranscription factor BTF3 homolog 4 OS=Homo sapiens OX=9606 GN=BTF3L4 PE=1 SV=1	C	GO:0005829	cytosol
Q96K17	BT3L4_HUMANTranscription factor BTF3 homolog 4 OS=Homo sapiens OX=9606 GN=BTF3L4 PE=1 SV=1	C	GO:0005854	nascent polypeptide-associated complex
Q96K17	BT3L4_HUMANTranscription factor BTF3 homolog 4 OS=Homo sapiens OX=9606 GN=BTF3L4 PE=1 SV=1	C	GO:0042788	polysomal ribosome
Q96K17	BT3L4_HUMANTranscription factor BTF3 homolog 4 OS=Homo sapiens OX=9606 GN=BTF3L4 PE=1 SV=1	F	GO:0005515	protein binding
Q96K17	BT3L4_HUMANTranscription factor BTF3 homolog 4 OS=Homo sapiens OX=9606 GN=BTF3L4 PE=1 SV=1	P	GO:0001701	in utero embryonic development
Q96K17	BT3L4_HUMANTranscription factor BTF3 homolog 4 OS=Homo sapiens OX=9606 GN=BTF3L4 PE=1 SV=1	P	GO:0006366	transcription by RNA polymerase II
Q96K17	BT3L4_HUMANTranscription factor BTF3 homolog 4 OS=Homo sapiens OX=9606 GN=BTF3L4 PE=1 SV=1	P	GO:0015031	protein transport
P02679	FIBG_HUMANFibrinogen gamma chain OS=Homo sapiens OX=9606 GN=FGG PE=1 SV=3	C	GO:0005577	fibrinogen complex
P02679	FIBG_HUMANFibrinogen gamma chain OS=Homo sapiens OX=9606 GN=FGG PE=1 SV=3	C	GO:0005788	endoplasmic reticulum lumen
P02679	FIBG_HUMANFibrinogen gamma chain OS=Homo sapiens OX=9606 GN=FGG PE=1 SV=3	C	GO:0016020	membrane
P02679	FIBG_HUMANFibrinogen gamma chain OS=Homo sapiens OX=9606 GN=FGG PE=1 SV=3	F	GO:0005102	signaling receptor binding
P02679	FIBG_HUMANFibrinogen gamma chain OS=Homo sapiens OX=9606 GN=FGG PE=1 SV=3	F	GO:0005201	extracellular matrix structural constituent
P02679	FIBG_HUMANFibrinogen gamma chain OS=Homo sapiens OX=9606 GN=FGG PE=1 SV=3	F	GO:0043167	ion binding
P02679	FIBG_HUMANFibrinogen gamma chain OS=Homo sapiens OX=9606 GN=FGG PE=1 SV=3	F	GO:0050839	cell adhesion molecule binding
P02679	FIBG_HUMANFibrinogen gamma chain OS=Homo sapiens OX=9606 GN=FGG PE=1 SV=3	F	GO:0097367	carbohydrate derivative binding
P02679	FIBG_HUMANFibrinogen gamma chain OS=Homo sapiens OX=9606 GN=FGG PE=1 SV=3	P	GO:0002221	pattern recognition receptor signaling pathway
P02679	FIBG_HUMANFibrinogen gamma chain OS=Homo sapiens OX=9606 GN=FGG PE=1 SV=3	P	GO:0002252	immune effector process
P02679	FIBG_HUMANFibrinogen gamma chain OS=Homo sapiens OX=9606 GN=FGG PE=1 SV=3	P	GO:0016192	vesicle-mediated transport
P02679	FIBG_HUMANFibrinogen gamma chain OS=Homo sapiens OX=9606 GN=FGG PE=1 SV=3	P	GO:0030168	platelet activation
P02679	FIBG_HUMANFibrinogen gamma chain OS=Homo sapiens OX=9606 GN=FGG PE=1 SV=3	P	GO:0048523	negative regulation of cellular process
P02679	FIBG_HUMANFibrinogen gamma chain OS=Homo sapiens OX=9606 GN=FGG PE=1 SV=3	P	GO:0051258	protein polymerization
P02679	FIBG_HUMANFibrinogen gamma chain OS=Homo sapiens OX=9606 GN=FGG PE=1 SV=3	P	GO:0051592	response to calcium ion
P02679	FIBG_HUMANFibrinogen gamma chain OS=Homo sapiens OX=9606 GN=FGG PE=1 SV=3	P	GO:0070374	positive regulation of ERK1 and ERK2 cascade
P02679	FIBG_HUMANFibrinogen gamma chain OS=Homo sapiens OX=9606 GN=FGG PE=1 SV=3	P	GO:0071354	cellular response to interleukin-6
P02679	FIBG_HUMANFibrinogen gamma chain OS=Homo sapiens OX=9606 GN=FGG PE=1 SV=3	P	GO:0072378	blood coagulation, fibrin clot formation
P02679	FIBG_HUMANFibrinogen gamma chain OS=Homo sapiens OX=9606 GN=FGG PE=1 SV=3	P	GO:0072574	hepatocyte proliferation
P02679	FIBG_HUMANFibrinogen gamma chain OS=Homo sapiens OX=9606 GN=FGG PE=1 SV=3	C	GO:0005578	extracellular matrix
Q14697	GANAB_HUMANNeutral alpha-glucosidase AB OS=Homo sapiens OX=9606 GN=GANAB PE=1 SV=3	C	GO:0005788	endoplasmic reticulum lumen
Q14697	GANAB_HUMANNeutral alpha-glucosidase AB OS=Homo sapiens OX=9606 GN=GANAB PE=1 SV=3	C	GO:0005794	Golgi apparatus
Q14697	GANAB_HUMANNeutral alpha-glucosidase AB OS=Homo sapiens OX=9606 GN=GANAB PE=1 SV=3	C	GO:0016020	membrane
Q14697	GANAB_HUMANNeutral alpha-glucosidase AB OS=Homo sapiens OX=9606 GN=GANAB PE=1 SV=3	C	GO:0017177	glucosidase II complex
Q14697	GANAB_HUMANNeutral alpha-glucosidase AB OS=Homo sapiens OX=9606 GN=GANAB PE=1 SV=3	C	GO:0042470	melanosome
Q14697	GANAB_HUMANNeutral alpha-glucosidase AB OS=Homo sapiens OX=9606 GN=GANAB PE=1 SV=3	F	GO:0004558	alpha-1,4-glucosidase activity
Q14697	GANAB_HUMANNeutral alpha-glucosidase AB OS=Homo sapiens OX=9606 GN=GANAB PE=1 SV=3	F	GO:0005515	protein binding
Q14697	GANAB_HUMANNeutral alpha-glucosidase AB OS=Homo sapiens OX=9606 GN=GANAB PE=1 SV=3	F	GO:0030246	carbohydrate binding
Q14697	GANAB_HUMANNeutral alpha-glucosidase AB OS=Homo sapiens OX=9606 GN=GANAB PE=1 SV=3	F	GO:0033919	glucan 1,3-alpha-glucosidase activity
Q14697	GANAB_HUMANNeutral alpha-glucosidase AB OS=Homo sapiens OX=9606 GN=GANAB PE=1 SV=3	P	GO:0006457	protein folding
Q14697	GANAB_HUMANNeutral alpha-glucosidase AB OS=Homo sapiens OX=9606 GN=GANAB PE=1 SV=3	P	GO:0006491	N-glycan processing
Q14697	GANAB_HUMANNeutral alpha-glucosidase AB OS=Homo sapiens OX=9606 GN=GANAB PE=1 SV=3	P	GO:0065008	regulation of biological quality
Q14697	GANAB_HUMANNeutral alpha-glucosidase AB OS=Homo sapiens OX=9606 GN=GANAB PE=1 SV=3	P	GO:0005982	starch metabolic process
Q14697	GANAB_HUMANNeutral alpha-glucosidase AB OS=Homo sapiens OX=9606 GN=GANAB PE=1 SV=3	P	GO:0005985	sucrose metabolic process
Q14697	GANAB_HUMANNeutral alpha-glucosidase AB OS=Homo sapiens OX=9606 GN=GANAB PE=1 SV=3	P	GO:0006012	galactose metabolic process
P46821	MAP1B_HUMANMicrotubule-associated 1B OS=Homo sapiens OX=9606 GN=MAP1B PE=1 SV=2	C	GO:0001750	photoreceptor outer segment
P46821	MAP1B_HUMANMicrotubule-associated 1B OS=Homo sapiens OX=9606 GN=MAP1B PE=1 SV=2	C	GO:0005730	nucleolus
P46821	MAP1B_HUMANMicrotubule-associated 1B OS=Homo sapiens OX=9606 GN=MAP1B PE=1 SV=2	C	GO:0005829	cytosol
P46821	MAP1B_HUMANMicrotubule-associated 1B OS=Homo sapiens OX=9606 GN=MAP1B PE=1 SV=2	C	GO:0005875	microtubule associated complex
P46821	MAP1B_HUMANMicrotubule-associated 1B OS=Homo sapiens OX=9606 GN=MAP1B PE=1 SV=2	C	GO:0005886	plasma membrane
P46821	MAP1B_HUMANMicrotubule-associated 1B OS=Homo sapiens OX=9606 GN=MAP1B PE=1 SV=2	C	GO:0014069	postsynaptic density
P46821	MAP1B_HUMANMicrotubule-associated 1B OS=Homo sapiens OX=9606 GN=MAP1B PE=1 SV=2	C	GO:0030054	cell junction
P46821	MAP1B_HUMANMicrotubule-associated 1B OS=Homo sapiens OX=9606 GN=MAP1B PE=1 SV=2	C	GO:0030426	growth cone
P46821	MAP1B_HUMANMicrotubule-associated 1B OS=Homo sapiens OX=9606 GN=MAP1B PE=1 SV=2	C	GO:0043194	axon initial segment
P46821	MAP1B_HUMANMicrotubule-associated 1B OS=Homo sapiens OX=9606 GN=MAP1B PE=1 SV=2	C	GO:0043196	varicosity
P46821	MAP1B_HUMANMicrotubule-associated 1B OS=Homo sapiens OX=9606 GN=MAP1B PE=1 SV=2	C	GO:0043197	dendritic spine
P46821	MAP1B_HUMANMicrotubule-associated 1B OS=Homo sapiens OX=9606 GN=MAP1B PE=1 SV=2	C	GO:0043198	dendritic shaft
P46821	MAP1B_HUMANMicrotubule-associated 1B OS=Homo sapiens OX=9606 GN=MAP1B PE=1 SV=2	C	GO:0043204	perikaryon
P46821	MAP1B_HUMANMicrotubule-associated 1B OS=Homo sapiens OX=9606 GN=MAP1B PE=1 SV=2	C	GO:0044307	dendritic branch
P46821	MAP1B_HUMANMicrotubule-associated 1B OS=Homo sapiens OX=9606 GN=MAP1B PE=1 SV=2	C	GO:0048471	perinuclear region of cytoplasm
P46821	MAP1B_HUMANMicrotubule-associated 1B OS=Homo sapiens OX=9606 GN=MAP1B PE=1 SV=2	C	GO:0097440	apical dendrite
P46821	MAP1B_HUMANMicrotubule-associated 1B OS=Homo sapiens OX=9606 GN=MAP1B PE=1 SV=2	C	GO:0097441	basal dendrite
P46821	MAP1B_HUMANMicrotubule-associated 1B OS=Homo sapiens OX=9606 GN=MAP1B PE=1 SV=2	C	GO:0097457	hippocampal mossy fiber
P46821	MAP1B_HUMANMicrotubule-associated 1B OS=Homo sapiens OX=9606 GN=MAP1B PE=1 SV=2	C	GO:0150001	primary dendrite
P46821	MAP1B_HUMANMicrotubule-associated 1B OS=Homo sapiens OX=9606 GN=MAP1B PE=1 SV=2	C	GO:1901588	dendritic microtubule
P46821	MAP1B_HUMANMicrotubule-associated 1B OS=Homo sapiens OX=9606 GN=MAP1B PE=1 SV=2	C	GO:1904115	axon cytoplasm
P46821	MAP1B_HUMANMicrotubule-associated 1B OS=Homo sapiens OX=9606 GN=MAP1B PE=1 SV=2	F	GO:0003677	DNA binding
P46821	MAP1B_HUMANMicrotubule-associated 1B OS=Homo sapiens OX=9606 GN=MAP1B PE=1 SV=2	F	GO:0004536	deoxyribonuclease activity
P46821	MAP1B_HUMANMicrotubule-associated 1B OS=Homo sapiens OX=9606 GN=MAP1B PE=1 SV=2	F	GO:0005198	structural molecule activity
P46821	MAP1B_HUMANMicrotubule-associated 1B OS=Homo sapiens OX=9606 GN=MAP1B PE=1 SV=2	F	GO:0005543	phospholipid binding
P46821	MAP1B_HUMANMicrotubule-associated 1B OS=Homo sapiens OX=9606 GN=MAP1B PE=1 SV=2	F	GO:0008017	microtubule binding
P46821	MAP1B_HUMANMicrotubule-associated 1B OS=Homo sapiens OX=9606 GN=MAP1B PE=1 SV=2	F	GO:0008093	cytoskeletal adaptor activity
P46821	MAP1B_HUMANMicrotubule-associated 1B OS=Homo sapiens OX=9606 GN=MAP1B PE=1 SV=2	F	GO:0048156	tau protein binding
P46821	MAP1B_HUMANMicrotubule-associated 1B OS=Homo sapiens OX=9606 GN=MAP1B PE=1 SV=2	F	GO:0048487	beta-tubulin binding
P46821	MAP1B_HUMANMicrotubule-associated 1B OS=Homo sapiens OX=9606 GN=MAP1B PE=1 SV=2	F	GO:0051015	actin filament binding
P46821	MAP1B_HUMANMicrotubule-associated 1B OS=Homo sapiens OX=9606 GN=MAP1B PE=1 SV=2	P	GO:0001578	microtubule bundle formation
P46821	MAP1B_HUMANMicrotubule-associated 1B OS=Homo sapiens OX=9606 GN=MAP1B PE=1 SV=2	P	GO:0001764	neuron migration
P46821	MAP1B_HUMANMicrotubule-associated 1B OS=Homo sapiens OX=9606 GN=MAP1B PE=1 SV=2	P	GO:0007026	negative regulation of microtubule depolymerization
P46821	MAP1B_HUMANMicrotubule-associated 1B OS=Homo sapiens OX=9606 GN=MAP1B PE=1 SV=2	P	GO:0007416	synapse assembly
P46821	MAP1B_HUMANMicrotubule-associated 1B OS=Homo sapiens OX=9606 GN=MAP1B PE=1 SV=2	P	GO:0007613	memory
P46821	MAP1B_HUMANMicrotubule-associated 1B OS=Homo sapiens OX=9606 GN=MAP1B PE=1 SV=2	P	GO:0008306	associative learning
P46821	MAP1B_HUMANMicrotubule-associated 1B OS=Homo sapiens OX=9606 GN=MAP1B PE=1 SV=2	P	GO:0009612	response to mechanical stimulus
P46821	MAP1B_HUMANMicrotubule-associated 1B OS=Homo sapiens OX=9606 GN=MAP1B PE=1 SV=2	P	GO:0009743	response to carbohydrate
P46821	MAP1B_HUMANMicrotubule-associated 1B OS=Homo sapiens OX=9606 GN=MAP1B PE=1 SV=2	P	GO:0010035	response to inorganic substance
P46821	MAP1B_HUMANMicrotubule-associated 1B OS=Homo sapiens OX=9606 GN=MAP1B PE=1 SV=2	P	GO:0010848	regulation of chromatin disassembly
P46821	MAP1B_HUMANMicrotubule-associated 1B OS=Homo sapiens OX=9606 GN=MAP1B PE=1 SV=2	P	GO:0014012	peripheral nervous system axon regeneration
P46821	MAP1B_HUMANMicrotubule-associated 1B OS=Homo sapiens OX=9606 GN=MAP1B PE=1 SV=2	P	GO:0016358	dendrite development
P46821	MAP1B_HUMANMicrotubule-associated 1B OS=Homo sapiens OX=9606 GN=MAP1B PE=1 SV=2	P	GO:0017085	response to insecticide
P46821	MAP1B_HUMANMicrotubule-associated 1B OS=Homo sapiens OX=9606 GN=MAP1B PE=1 SV=2	P	GO:0021700	developmental maturation
P46821	MAP1B_HUMANMicrotubule-associated 1B OS=Homo sapiens OX=9606 GN=MAP1B PE=1 SV=2	P	GO:0031116	positive regulation of microtubule polymerization
P46821	MAP1B_HUMANMicrotubule-associated 1B OS=Homo sapiens OX=9606 GN=MAP1B PE=1 SV=2	P	GO:0032355	response to estradiol
P46821	MAP1B_HUMANMicrotubule-associated 1B OS=Homo sapiens OX=9606 GN=MAP1B PE=1 SV=2	P	GO:0032387	negative regulation of intracellular transport
P46821	MAP1B_HUMANMicrotubule-associated 1B OS=Homo sapiens OX=9606 GN=MAP1B PE=1 SV=2	P	GO:0032435	negative regulation of proteasomal ubiquitin-dependent protein catabolic process
P46821	MAP1B_HUMANMicrotubule-associated 1B OS=Homo sapiens OX=9606 GN=MAP1B PE=1 SV=2	P	GO:0033189	response to vitamin A
P46821	MAP1B_HUMANMicrotubule-associated 1B OS=Homo sapiens OX=9606 GN=MAP1B PE=1 SV=2	P	GO:0042493	response to drug
P46821	MAP1B_HUMANMicrotubule-associated 1B OS=Homo sapiens OX=9606 GN=MAP1B PE=1 SV=2	P	GO:0045773	positive regulation of axon extension
P46821	MAP1B_HUMANMicrotubule-associated 1B OS=Homo sapiens OX=9606 GN=MAP1B PE=1 SV=2	P	GO:0047497	mitochondrion transport along microtubule
P46821	MAP1B_HUMANMicrotubule-associated 1B OS=Homo sapiens OX=9606 GN=MAP1B PE=1 SV=2	P	GO:0050882	voluntary musculoskeletal movement
P46821	MAP1B_HUMANMicrotubule-associated 1B OS=Homo sapiens OX=9606 GN=MAP1B PE=1 SV=2	P	GO:0051915	induction of synaptic plasticity by chemical substance
P46821	MAP1B_HUMANMicrotubule-associated 1B OS=Homo sapiens OX=9606 GN=MAP1B PE=1 SV=2	P	GO:0061162	establishment of monopolar cell polarity
P46821	MAP1B_HUMANMicrotubule-associated 1B OS=Homo sapiens OX=9606 GN=MAP1B PE=1 SV=2	P	GO:0070050	neuron cellular homeostasis
P46821	MAP1B_HUMANMicrotubule-associated 1B OS=Homo sapiens OX=9606 GN=MAP1B PE=1 SV=2	P	GO:0071363	cellular response to growth factor stimulus
P46821	MAP1B_HUMANMicrotubule-associated 1B OS=Homo sapiens OX=9606 GN=MAP1B PE=1 SV=2	P	GO:0071375	cellular response to peptide hormone stimulus
P46821	MAP1B_HUMANMicrotubule-associated 1B OS=Homo sapiens OX=9606 GN=MAP1B PE=1 SV=2	P	GO:0099641	anterograde axonal protein transport
P46821	MAP1B_HUMANMicrotubule-associated 1B OS=Homo sapiens OX=9606 GN=MAP1B PE=1 SV=2	P	GO:0099642	retrograde axonal protein transport
P46821	MAP1B_HUMANMicrotubule-associated 1B OS=Homo sapiens OX=9606 GN=MAP1B PE=1 SV=2	P	GO:1902817	negative regulation of protein localization to microtubule
P46821	MAP1B_HUMANMicrotubule-associated 1B OS=Homo sapiens OX=9606 GN=MAP1B PE=1 SV=2	P	GO:1990535	neuron projection maintenance
P46821	MAP1B_HUMANMicrotubule-associated 1B OS=Homo sapiens OX=9606 GN=MAP1B PE=1 SV=2	P	GO:2000010	positive regulation of protein localization to cell surface
P46821	MAP1B_HUMANMicrotubule-associated 1B OS=Homo sapiens OX=9606 GN=MAP1B PE=1 SV=2	P	GO:0006308	DNA catabolic process
P46821	MAP1B_HUMANMicrotubule-associated 1B OS=Homo sapiens OX=9606 GN=MAP1B PE=1 SV=2	C	GO:0045298	tubulin complex
Q14061	COX17_HUMANCytochrome c oxidase copper chaperone OS=Homo sapiens OX=9606 GN=COX17 PE=1 SV=2	C	GO:0005758	mitochondrial intermembrane space
Q14061	COX17_HUMANCytochrome c oxidase copper chaperone OS=Homo sapiens OX=9606 GN=COX17 PE=1 SV=2	F	GO:0005515	protein binding
Q14061	COX17_HUMANCytochrome c oxidase copper chaperone OS=Homo sapiens OX=9606 GN=COX17 PE=1 SV=2	F	GO:0016531	copper chaperone activity
Q14061	COX17_HUMANCytochrome c oxidase copper chaperone OS=Homo sapiens OX=9606 GN=COX17 PE=1 SV=2	F	GO:1903136	cuprous ion binding
Q14061	COX17_HUMANCytochrome c oxidase copper chaperone OS=Homo sapiens OX=9606 GN=COX17 PE=1 SV=2	P	GO:0006825	copper ion transport
Q14061	COX17_HUMANCytochrome c oxidase copper chaperone OS=Homo sapiens OX=9606 GN=COX17 PE=1 SV=2	P	GO:0007420	brain development
Q14061	COX17_HUMANCytochrome c oxidase copper chaperone OS=Homo sapiens OX=9606 GN=COX17 PE=1 SV=2	P	GO:0007507	heart development
Q14061	COX17_HUMANCytochrome c oxidase copper chaperone OS=Homo sapiens OX=9606 GN=COX17 PE=1 SV=2	P	GO:0008284	positive regulation of cell population proliferation
Q14061	COX17_HUMANCytochrome c oxidase copper chaperone OS=Homo sapiens OX=9606 GN=COX17 PE=1 SV=2	P	GO:0033617	mitochondrial respiratory chain complex IV assembly
Q14061	COX17_HUMANCytochrome c oxidase copper chaperone OS=Homo sapiens OX=9606 GN=COX17 PE=1 SV=2	P	GO:1904960	positive regulation of cytochrome-c oxidase activity
P27701	CD82_HUMANCD82 antigen OS=Homo sapiens OX=9606 GN=CD82 PE=1 SV=1	C	GO:0001772	immunological synapse
P27701	CD82_HUMANCD82 antigen OS=Homo sapiens OX=9606 GN=CD82 PE=1 SV=1	C	GO:0005887	integral component of plasma membrane
P27701	CD82_HUMANCD82 antigen OS=Homo sapiens OX=9606 GN=CD82 PE=1 SV=1	C	GO:0043227	membrane-bounded organelle
P27701	CD82_HUMANCD82 antigen OS=Homo sapiens OX=9606 GN=CD82 PE=1 SV=1	C	GO:0044444	cytoplasmic part
P27701	CD82_HUMANCD82 antigen OS=Homo sapiens OX=9606 GN=CD82 PE=1 SV=1	F	GO:0005515	protein binding
P27701	CD82_HUMANCD82 antigen OS=Homo sapiens OX=9606 GN=CD82 PE=1 SV=1	P	GO:0019538	protein metabolic process
P27701	CD82_HUMANCD82 antigen OS=Homo sapiens OX=9606 GN=CD82 PE=1 SV=1	P	GO:0034613	cellular protein localization
P27701	CD82_HUMANCD82 antigen OS=Homo sapiens OX=9606 GN=CD82 PE=1 SV=1	P	GO:0048522	positive regulation of cellular process
P27701	CD82_HUMANCD82 antigen OS=Homo sapiens OX=9606 GN=CD82 PE=1 SV=1	P	GO:0050896	response to stimulus
P27701	CD82_HUMANCD82 antigen OS=Homo sapiens OX=9606 GN=CD82 PE=1 SV=1	P	GO:0051234	establishment of localization
P21926	CD9_HUMANCD9 antigen OS=Homo sapiens OX=9606 GN=CD9 PE=1 SV=4	C	GO:0016323	basolateral plasma membrane
P21926	CD9_HUMANCD9 antigen OS=Homo sapiens OX=9606 GN=CD9 PE=1 SV=4	C	GO:0070062	extracellular exosome
P21926	CD9_HUMANCD9 antigen OS=Homo sapiens OX=9606 GN=CD9 PE=1 SV=4	F	GO:0001618	virus receptor activity
P21926	CD9_HUMANCD9 antigen OS=Homo sapiens OX=9606 GN=CD9 PE=1 SV=4	F	GO:0005178	integrin binding
P21926	CD9_HUMANCD9 antigen OS=Homo sapiens OX=9606 GN=CD9 PE=1 SV=4	F	GO:0042289	MHC class II protein binding
P21926	CD9_HUMANCD9 antigen OS=Homo sapiens OX=9606 GN=CD9 PE=1 SV=4	F	GO:1990459	transferrin receptor binding
P21926	CD9_HUMANCD9 antigen OS=Homo sapiens OX=9606 GN=CD9 PE=1 SV=4	P	GO:0000187	activation of MAPK activity
P21926	CD9_HUMANCD9 antigen OS=Homo sapiens OX=9606 GN=CD9 PE=1 SV=4	P	GO:0000768	syncytium formation by plasma membrane fusion
P21926	CD9_HUMANCD9 antigen OS=Homo sapiens OX=9606 GN=CD9 PE=1 SV=4	P	GO:0002455	humoral immune response mediated by circulating immunoglobulin
P21926	CD9_HUMANCD9 antigen OS=Homo sapiens OX=9606 GN=CD9 PE=1 SV=4	P	GO:0007342	fusion of sperm to egg plasma membrane involved in single fertilization
P21926	CD9_HUMANCD9 antigen OS=Homo sapiens OX=9606 GN=CD9 PE=1 SV=4	P	GO:0007420	brain development
P21926	CD9_HUMANCD9 antigen OS=Homo sapiens OX=9606 GN=CD9 PE=1 SV=4	P	GO:0009888	tissue development
P21926	CD9_HUMANCD9 antigen OS=Homo sapiens OX=9606 GN=CD9 PE=1 SV=4	P	GO:0016192	vesicle-mediated transport
P21926	CD9_HUMANCD9 antigen OS=Homo sapiens OX=9606 GN=CD9 PE=1 SV=4	P	GO:0022008	neurogenesis
P21926	CD9_HUMANCD9 antigen OS=Homo sapiens OX=9606 GN=CD9 PE=1 SV=4	P	GO:0030334	regulation of cell migration
P21926	CD9_HUMANCD9 antigen OS=Homo sapiens OX=9606 GN=CD9 PE=1 SV=4	P	GO:0030449	regulation of complement activation
P21926	CD9_HUMANCD9 antigen OS=Homo sapiens OX=9606 GN=CD9 PE=1 SV=4	P	GO:0030890	positive regulation of B cell proliferation
P21926	CD9_HUMANCD9 antigen OS=Homo sapiens OX=9606 GN=CD9 PE=1 SV=4	P	GO:0030913	paranodal junction assembly
P21926	CD9_HUMANCD9 antigen OS=Homo sapiens OX=9606 GN=CD9 PE=1 SV=4	P	GO:0031647	regulation of protein stability
P21926	CD9_HUMANCD9 antigen OS=Homo sapiens OX=9606 GN=CD9 PE=1 SV=4	P	GO:0042060	wound healing
P21926	CD9_HUMANCD9 antigen OS=Homo sapiens OX=9606 GN=CD9 PE=1 SV=4	P	GO:0043128	positive regulation of 1-phosphatidylinositol 4-kinase activity
P21926	CD9_HUMANCD9 antigen OS=Homo sapiens OX=9606 GN=CD9 PE=1 SV=4	P	GO:0045944	positive regulation of transcription by RNA polymerase II
P21926	CD9_HUMANCD9 antigen OS=Homo sapiens OX=9606 GN=CD9 PE=1 SV=4	P	GO:0046718	viral entry into host cell
P21926	CD9_HUMANCD9 antigen OS=Homo sapiens OX=9606 GN=CD9 PE=1 SV=4	P	GO:0046813	receptor-mediated virion attachment to host cell
P21926	CD9_HUMANCD9 antigen OS=Homo sapiens OX=9606 GN=CD9 PE=1 SV=4	P	GO:0050731	positive regulation of peptidyl-tyrosine phosphorylation
P21926	CD9_HUMANCD9 antigen OS=Homo sapiens OX=9606 GN=CD9 PE=1 SV=4	P	GO:0050861	positive regulation of B cell receptor signaling pathway
P21926	CD9_HUMANCD9 antigen OS=Homo sapiens OX=9606 GN=CD9 PE=1 SV=4	P	GO:0061462	protein localization to lysosome
P21926	CD9_HUMANCD9 antigen OS=Homo sapiens OX=9606 GN=CD9 PE=1 SV=4	P	GO:0070863	positive regulation of protein exit from endoplasmic reticulum
P21926	CD9_HUMANCD9 antigen OS=Homo sapiens OX=9606 GN=CD9 PE=1 SV=4	P	GO:1903911	positive regulation of receptor clustering
P21926	CD9_HUMANCD9 antigen OS=Homo sapiens OX=9606 GN=CD9 PE=1 SV=4	P	GO:1904352	positive regulation of protein catabolic process in the vacuole
P21926	CD9_HUMANCD9 antigen OS=Homo sapiens OX=9606 GN=CD9 PE=1 SV=4	P	GO:1905676	positive regulation of adaptive immune memory response
P21926	CD9_HUMANCD9 antigen OS=Homo sapiens OX=9606 GN=CD9 PE=1 SV=4	P	GO:2001190	positive regulation of T cell activation via T cell receptor contact with antigen bound to MHC molecule on antigen presenting cell
P21926	CD9_HUMANCD9 antigen OS=Homo sapiens OX=9606 GN=CD9 PE=1 SV=4	C	GO:0008305	integrin complex
P02751	FINC_HUMANFibronectin OS=Homo sapiens OX=9606 GN=FN1 PE=1 SV=5	C	GO:0005615	extracellular space
P02751	FINC_HUMANFibronectin OS=Homo sapiens OX=9606 GN=FN1 PE=1 SV=5	C	GO:0016020	membrane
P02751	FINC_HUMANFibronectin OS=Homo sapiens OX=9606 GN=FN1 PE=1 SV=5	C	GO:0043227	membrane-bounded organelle
P02751	FINC_HUMANFibronectin OS=Homo sapiens OX=9606 GN=FN1 PE=1 SV=5	C	GO:0043229	intracellular organelle
P02751	FINC_HUMANFibronectin OS=Homo sapiens OX=9606 GN=FN1 PE=1 SV=5	F	GO:0005518	collagen binding
P02751	FINC_HUMANFibronectin OS=Homo sapiens OX=9606 GN=FN1 PE=1 SV=5	F	GO:0016787	hydrolase activity
P02751	FINC_HUMANFibronectin OS=Homo sapiens OX=9606 GN=FN1 PE=1 SV=5	F	GO:0019899	enzyme binding
P02751	FINC_HUMANFibronectin OS=Homo sapiens OX=9606 GN=FN1 PE=1 SV=5	P	GO:0006796	phosphate-containing compound metabolic process
P02751	FINC_HUMANFibronectin OS=Homo sapiens OX=9606 GN=FN1 PE=1 SV=5	P	GO:0007161	calcium-independent cell-matrix adhesion
P02751	FINC_HUMANFibronectin OS=Homo sapiens OX=9606 GN=FN1 PE=1 SV=5	P	GO:0010646	regulation of cell communication
P02751	FINC_HUMANFibronectin OS=Homo sapiens OX=9606 GN=FN1 PE=1 SV=5	P	GO:0016043	cellular component organization
P02751	FINC_HUMANFibronectin OS=Homo sapiens OX=9606 GN=FN1 PE=1 SV=5	P	GO:0018149	peptide cross-linking
P02751	FINC_HUMANFibronectin OS=Homo sapiens OX=9606 GN=FN1 PE=1 SV=5	P	GO:0023051	regulation of signaling
P02751	FINC_HUMANFibronectin OS=Homo sapiens OX=9606 GN=FN1 PE=1 SV=5	P	GO:0043687	post-translational protein modification
P02751	FINC_HUMANFibronectin OS=Homo sapiens OX=9606 GN=FN1 PE=1 SV=5	P	GO:0045596	negative regulation of cell differentiation
P02751	FINC_HUMANFibronectin OS=Homo sapiens OX=9606 GN=FN1 PE=1 SV=5	P	GO:0048146	positive regulation of fibroblast proliferation
P02751	FINC_HUMANFibronectin OS=Homo sapiens OX=9606 GN=FN1 PE=1 SV=5	P	GO:0050767	regulation of neurogenesis
P02751	FINC_HUMANFibronectin OS=Homo sapiens OX=9606 GN=FN1 PE=1 SV=5	P	GO:0050896	response to stimulus
P02751	FINC_HUMANFibronectin OS=Homo sapiens OX=9606 GN=FN1 PE=1 SV=5	P	GO:0051241	negative regulation of multicellular organismal process
P02751	FINC_HUMANFibronectin OS=Homo sapiens OX=9606 GN=FN1 PE=1 SV=5	C	GO:0005581	collagen trimer
Q96S97	MYADM_HUMANMyeloid-associated differentiation marker OS=Homo sapiens OX=9606 GN=MYADM PE=1 SV=2	C	GO:0001726	ruffle
Q96S97	MYADM_HUMANMyeloid-associated differentiation marker OS=Homo sapiens OX=9606 GN=MYADM PE=1 SV=2	C	GO:0005886	plasma membrane
Q96S97	MYADM_HUMANMyeloid-associated differentiation marker OS=Homo sapiens OX=9606 GN=MYADM PE=1 SV=2	C	GO:0005911	cell-cell junction
Q96S97	MYADM_HUMANMyeloid-associated differentiation marker OS=Homo sapiens OX=9606 GN=MYADM PE=1 SV=2	C	GO:0016021	integral component of membrane
Q96S97	MYADM_HUMANMyeloid-associated differentiation marker OS=Homo sapiens OX=9606 GN=MYADM PE=1 SV=2	C	GO:0030864	cortical actin cytoskeleton
Q96S97	MYADM_HUMANMyeloid-associated differentiation marker OS=Homo sapiens OX=9606 GN=MYADM PE=1 SV=2	C	GO:0045121	membrane raft
Q96S97	MYADM_HUMANMyeloid-associated differentiation marker OS=Homo sapiens OX=9606 GN=MYADM PE=1 SV=2	P	GO:0001933	negative regulation of protein phosphorylation
Q96S97	MYADM_HUMANMyeloid-associated differentiation marker OS=Homo sapiens OX=9606 GN=MYADM PE=1 SV=2	P	GO:0010629	negative regulation of gene expression
Q96S97	MYADM_HUMANMyeloid-associated differentiation marker OS=Homo sapiens OX=9606 GN=MYADM PE=1 SV=2	P	GO:0030335	positive regulation of cell migration
Q96S97	MYADM_HUMANMyeloid-associated differentiation marker OS=Homo sapiens OX=9606 GN=MYADM PE=1 SV=2	P	GO:0030837	negative regulation of actin filament polymerization
Q96S97	MYADM_HUMANMyeloid-associated differentiation marker OS=Homo sapiens OX=9606 GN=MYADM PE=1 SV=2	P	GO:0031579	membrane raft organization
Q96S97	MYADM_HUMANMyeloid-associated differentiation marker OS=Homo sapiens OX=9606 GN=MYADM PE=1 SV=2	P	GO:0034115	negative regulation of heterotypic cell-cell adhesion
Q96S97	MYADM_HUMANMyeloid-associated differentiation marker OS=Homo sapiens OX=9606 GN=MYADM PE=1 SV=2	P	GO:0045217	cell-cell junction maintenance
Q96S97	MYADM_HUMANMyeloid-associated differentiation marker OS=Homo sapiens OX=9606 GN=MYADM PE=1 SV=2	P	GO:0061028	establishment of endothelial barrier
Q96S97	MYADM_HUMANMyeloid-associated differentiation marker OS=Homo sapiens OX=9606 GN=MYADM PE=1 SV=2	P	GO:0072659	protein localization to plasma membrane
Q96S97	MYADM_HUMANMyeloid-associated differentiation marker OS=Homo sapiens OX=9606 GN=MYADM PE=1 SV=2	P	GO:0090038	negative regulation of protein kinase C signaling
Q96S97	MYADM_HUMANMyeloid-associated differentiation marker OS=Homo sapiens OX=9606 GN=MYADM PE=1 SV=2	P	GO:1900026	positive regulation of substrate adhesion-dependent cell spreading
Q14533	type II cuticular Hb1 OS=Homo sapiens OX=9606 GN=KRT81 PE=1 SV=3	C	GO:0005829	cytosol
Q14533	type II cuticular Hb1 OS=Homo sapiens OX=9606 GN=KRT81 PE=1 SV=3	C	GO:0045095	keratin filament
Q14533	type II cuticular Hb1 OS=Homo sapiens OX=9606 GN=KRT81 PE=1 SV=3	F	GO:0005200	structural constituent of cytoskeleton
Q14533	type II cuticular Hb1 OS=Homo sapiens OX=9606 GN=KRT81 PE=1 SV=3	F	GO:0005515	protein binding
Q14533	type II cuticular Hb1 OS=Homo sapiens OX=9606 GN=KRT81 PE=1 SV=3	F	GO:0030280	structural constituent of epidermis
Q14533	type II cuticular Hb1 OS=Homo sapiens OX=9606 GN=KRT81 PE=1 SV=3	P	GO:0001942	hair follicle development
Q14533	type II cuticular Hb1 OS=Homo sapiens OX=9606 GN=KRT81 PE=1 SV=3	P	GO:0008284	positive regulation of cell population proliferation
Q14533	type II cuticular Hb1 OS=Homo sapiens OX=9606 GN=KRT81 PE=1 SV=3	P	GO:0035878	nail development
Q14533	type II cuticular Hb1 OS=Homo sapiens OX=9606 GN=KRT81 PE=1 SV=3	P	GO:0042060	wound healing
Q14533	type II cuticular Hb1 OS=Homo sapiens OX=9606 GN=KRT81 PE=1 SV=3	P	GO:0050830	defense response to Gram-positive bacterium
Q14533	type II cuticular Hb1 OS=Homo sapiens OX=9606 GN=KRT81 PE=1 SV=3	P	GO:0051801	cytolysis in other organism involved in symbiotic interaction
Q14533	type II cuticular Hb1 OS=Homo sapiens OX=9606 GN=KRT81 PE=1 SV=3	P	GO:0061844	antimicrobial humoral immune response mediated by antimicrobial peptide
Q14533	type II cuticular Hb1 OS=Homo sapiens OX=9606 GN=KRT81 PE=1 SV=3	P	GO:0070268	cornification
Q14533	type II cuticular Hb1 OS=Homo sapiens OX=9606 GN=KRT81 PE=1 SV=3	P	GO:2000536	negative regulation of entry of bacterium into host cell
O14495	PLPP3_HUMANPhospholipid phosphatase 3 OS=Homo sapiens OX=9606 GN=PLPP3 PE=1 SV=1	C	GO:0005794	Golgi apparatus
O14495	PLPP3_HUMANPhospholipid phosphatase 3 OS=Homo sapiens OX=9606 GN=PLPP3 PE=1 SV=1	C	GO:0005887	integral component of plasma membrane
O14495	PLPP3_HUMANPhospholipid phosphatase 3 OS=Homo sapiens OX=9606 GN=PLPP3 PE=1 SV=1	C	GO:0005912	adherens junction
O14495	PLPP3_HUMANPhospholipid phosphatase 3 OS=Homo sapiens OX=9606 GN=PLPP3 PE=1 SV=1	F	GO:0004721	phosphoprotein phosphatase activity
O14495	PLPP3_HUMANPhospholipid phosphatase 3 OS=Homo sapiens OX=9606 GN=PLPP3 PE=1 SV=1	F	GO:0005515	protein binding
O14495	PLPP3_HUMANPhospholipid phosphatase 3 OS=Homo sapiens OX=9606 GN=PLPP3 PE=1 SV=1	F	GO:0008195	phosphatidate phosphatase activity
O14495	PLPP3_HUMANPhospholipid phosphatase 3 OS=Homo sapiens OX=9606 GN=PLPP3 PE=1 SV=1	F	GO:0042392	sphingosine-1-phosphate phosphatase activity
O14495	PLPP3_HUMANPhospholipid phosphatase 3 OS=Homo sapiens OX=9606 GN=PLPP3 PE=1 SV=1	F	GO:0042577	lipid phosphatase activity
O14495	PLPP3_HUMANPhospholipid phosphatase 3 OS=Homo sapiens OX=9606 GN=PLPP3 PE=1 SV=1	P	GO:0001933	negative regulation of protein phosphorylation
O14495	PLPP3_HUMANPhospholipid phosphatase 3 OS=Homo sapiens OX=9606 GN=PLPP3 PE=1 SV=1	P	GO:0006470	protein dephosphorylation
O14495	PLPP3_HUMANPhospholipid phosphatase 3 OS=Homo sapiens OX=9606 GN=PLPP3 PE=1 SV=1	P	GO:0007205	protein kinase C-activating G protein-coupled receptor signaling pathway
O14495	PLPP3_HUMANPhospholipid phosphatase 3 OS=Homo sapiens OX=9606 GN=PLPP3 PE=1 SV=1	P	GO:0008285	negative regulation of cell population proliferation
O14495	PLPP3_HUMANPhospholipid phosphatase 3 OS=Homo sapiens OX=9606 GN=PLPP3 PE=1 SV=1	P	GO:0008354	germ cell migration
O14495	PLPP3_HUMANPhospholipid phosphatase 3 OS=Homo sapiens OX=9606 GN=PLPP3 PE=1 SV=1	P	GO:0019216	regulation of lipid metabolic process
O14495	PLPP3_HUMANPhospholipid phosphatase 3 OS=Homo sapiens OX=9606 GN=PLPP3 PE=1 SV=1	P	GO:0030111	regulation of Wnt signaling pathway
O14495	PLPP3_HUMANPhospholipid phosphatase 3 OS=Homo sapiens OX=9606 GN=PLPP3 PE=1 SV=1	P	GO:0030148	sphingolipid biosynthetic process
O14495	PLPP3_HUMANPhospholipid phosphatase 3 OS=Homo sapiens OX=9606 GN=PLPP3 PE=1 SV=1	P	GO:0030521	androgen receptor signaling pathway
O14495	PLPP3_HUMANPhospholipid phosphatase 3 OS=Homo sapiens OX=9606 GN=PLPP3 PE=1 SV=1	P	GO:0034109	homotypic cell-cell adhesion
O14495	PLPP3_HUMANPhospholipid phosphatase 3 OS=Homo sapiens OX=9606 GN=PLPP3 PE=1 SV=1	P	GO:0044328	canonical Wnt signaling pathway involved in positive regulation of endothelial cell migration
O14495	PLPP3_HUMANPhospholipid phosphatase 3 OS=Homo sapiens OX=9606 GN=PLPP3 PE=1 SV=1	P	GO:0044329	canonical Wnt signaling pathway involved in positive regulation of cell-cell adhesion
O14495	PLPP3_HUMANPhospholipid phosphatase 3 OS=Homo sapiens OX=9606 GN=PLPP3 PE=1 SV=1	P	GO:0044330	canonical Wnt signaling pathway involved in positive regulation of wound healing
O14495	PLPP3_HUMANPhospholipid phosphatase 3 OS=Homo sapiens OX=9606 GN=PLPP3 PE=1 SV=1	P	GO:0046839	phospholipid dephosphorylation
O14495	PLPP3_HUMANPhospholipid phosphatase 3 OS=Homo sapiens OX=9606 GN=PLPP3 PE=1 SV=1	P	GO:0048731	system development
O14495	PLPP3_HUMANPhospholipid phosphatase 3 OS=Homo sapiens OX=9606 GN=PLPP3 PE=1 SV=1	P	GO:0050821	protein stabilization
O14495	PLPP3_HUMANPhospholipid phosphatase 3 OS=Homo sapiens OX=9606 GN=PLPP3 PE=1 SV=1	P	GO:0051091	positive regulation of DNA-binding transcription factor activity
O14495	PLPP3_HUMANPhospholipid phosphatase 3 OS=Homo sapiens OX=9606 GN=PLPP3 PE=1 SV=1	P	GO:0006687	glycosphingolipid metabolic process
O14495	PLPP3_HUMANPhospholipid phosphatase 3 OS=Homo sapiens OX=9606 GN=PLPP3 PE=1 SV=1	P	GO:0009395	phospholipid catabolic process
O14495	PLPP3_HUMANPhospholipid phosphatase 3 OS=Homo sapiens OX=9606 GN=PLPP3 PE=1 SV=1	P	GO:0046486	glycerolipid metabolic process
P04179	SODM_HUMANSuperoxide dismutase	C	GO:0005759	mitochondrial matrix
P04179	SODM_HUMANSuperoxide dismutase	F	GO:0004784	superoxide dismutase activity
P04179	SODM_HUMANSuperoxide dismutase	F	GO:0030145	manganese ion binding
P04179	SODM_HUMANSuperoxide dismutase	F	GO:0042802	identical protein binding
P04179	SODM_HUMANSuperoxide dismutase	P	GO:0001315	age-dependent response to reactive oxygen species
P04179	SODM_HUMANSuperoxide dismutase	P	GO:0001836	release of cytochrome c from mitochondria
P04179	SODM_HUMANSuperoxide dismutase	P	GO:0003069	acetylcholine-mediated vasodilation involved in regulation of systemic arterial blood pressure
P04179	SODM_HUMANSuperoxide dismutase	P	GO:0006357	regulation of transcription by RNA polymerase II
P04179	SODM_HUMANSuperoxide dismutase	P	GO:0019430	removal of superoxide radicals
P04179	SODM_HUMANSuperoxide dismutase	P	GO:0030335	positive regulation of cell migration
P04179	SODM_HUMANSuperoxide dismutase	P	GO:0032364	oxygen homeostasis
P04179	SODM_HUMANSuperoxide dismutase	P	GO:0035722	interleukin-12-mediated signaling pathway
P04179	SODM_HUMANSuperoxide dismutase	P	GO:0043524	negative regulation of neuron apoptotic process
P04179	SODM_HUMANSuperoxide dismutase	P	GO:0051289	protein homotetramerization
P04179	SODM_HUMANSuperoxide dismutase	P	GO:0055114	oxidation-reduction process
P04179	SODM_HUMANSuperoxide dismutase	P	GO:1902176	negative regulation of oxidative stress-induced intrinsic apoptotic signaling pathway
P04179	SODM_HUMANSuperoxide dismutase	P	GO:1904706	negative regulation of vascular smooth muscle cell proliferation
P04179	SODM_HUMANSuperoxide dismutase	P	GO:1905461	positive regulation of vascular associated smooth muscle cell apoptotic process
P04179	SODM_HUMANSuperoxide dismutase	P	GO:1905932	positive regulation of vascular smooth muscle cell differentiation involved in phenotypic switching
O95832	CLD1_HUMANClaudin-1 OS=Homo sapiens OX=9606 GN=CLDN1 PE=1 SV=1	C	GO:0005887	integral component of plasma membrane
O95832	CLD1_HUMANClaudin-1 OS=Homo sapiens OX=9606 GN=CLDN1 PE=1 SV=1	C	GO:0005923	bicellular tight junction
O95832	CLD1_HUMANClaudin-1 OS=Homo sapiens OX=9606 GN=CLDN1 PE=1 SV=1	C	GO:0016323	basolateral plasma membrane
O95832	CLD1_HUMANClaudin-1 OS=Homo sapiens OX=9606 GN=CLDN1 PE=1 SV=1	C	GO:0016324	apical plasma membrane
O95832	CLD1_HUMANClaudin-1 OS=Homo sapiens OX=9606 GN=CLDN1 PE=1 SV=1	C	GO:0016327	apicolateral plasma membrane
O95832	CLD1_HUMANClaudin-1 OS=Homo sapiens OX=9606 GN=CLDN1 PE=1 SV=1	C	GO:0016328	lateral plasma membrane
O95832	CLD1_HUMANClaudin-1 OS=Homo sapiens OX=9606 GN=CLDN1 PE=1 SV=1	C	GO:0030864	cortical actin cytoskeleton
O95832	CLD1_HUMANClaudin-1 OS=Homo sapiens OX=9606 GN=CLDN1 PE=1 SV=1	C	GO:0032991	protein-containing complex
O95832	CLD1_HUMANClaudin-1 OS=Homo sapiens OX=9606 GN=CLDN1 PE=1 SV=1	C	GO:0043231	intracellular membrane-bounded organelle
O95832	CLD1_HUMANClaudin-1 OS=Homo sapiens OX=9606 GN=CLDN1 PE=1 SV=1	F	GO:0001618	virus receptor activity
O95832	CLD1_HUMANClaudin-1 OS=Homo sapiens OX=9606 GN=CLDN1 PE=1 SV=1	F	GO:0004888	transmembrane signaling receptor activity
O95832	CLD1_HUMANClaudin-1 OS=Homo sapiens OX=9606 GN=CLDN1 PE=1 SV=1	F	GO:0005198	structural molecule activity
O95832	CLD1_HUMANClaudin-1 OS=Homo sapiens OX=9606 GN=CLDN1 PE=1 SV=1	F	GO:0005254	chloride channel activity
O95832	CLD1_HUMANClaudin-1 OS=Homo sapiens OX=9606 GN=CLDN1 PE=1 SV=1	F	GO:0042802	identical protein binding
O95832	CLD1_HUMANClaudin-1 OS=Homo sapiens OX=9606 GN=CLDN1 PE=1 SV=1	P	GO:0001666	response to hypoxia
O95832	CLD1_HUMANClaudin-1 OS=Homo sapiens OX=9606 GN=CLDN1 PE=1 SV=1	P	GO:0003151	outflow tract morphogenesis
O95832	CLD1_HUMANClaudin-1 OS=Homo sapiens OX=9606 GN=CLDN1 PE=1 SV=1	P	GO:0007179	transforming growth factor beta receptor signaling pathway
O95832	CLD1_HUMANClaudin-1 OS=Homo sapiens OX=9606 GN=CLDN1 PE=1 SV=1	P	GO:0007568	aging
O95832	CLD1_HUMANClaudin-1 OS=Homo sapiens OX=9606 GN=CLDN1 PE=1 SV=1	P	GO:0007612	learning
O95832	CLD1_HUMANClaudin-1 OS=Homo sapiens OX=9606 GN=CLDN1 PE=1 SV=1	P	GO:0008065	establishment of blood-nerve barrier
O95832	CLD1_HUMANClaudin-1 OS=Homo sapiens OX=9606 GN=CLDN1 PE=1 SV=1	P	GO:0010628	positive regulation of gene expression
O95832	CLD1_HUMANClaudin-1 OS=Homo sapiens OX=9606 GN=CLDN1 PE=1 SV=1	P	GO:0010629	negative regulation of gene expression
O95832	CLD1_HUMANClaudin-1 OS=Homo sapiens OX=9606 GN=CLDN1 PE=1 SV=1	P	GO:0016338	calcium-independent cell-cell adhesion via plasma membrane cell-adhesion molecules
O95832	CLD1_HUMANClaudin-1 OS=Homo sapiens OX=9606 GN=CLDN1 PE=1 SV=1	P	GO:0016525	negative regulation of angiogenesis
O95832	CLD1_HUMANClaudin-1 OS=Homo sapiens OX=9606 GN=CLDN1 PE=1 SV=1	P	GO:0030335	positive regulation of cell migration
O95832	CLD1_HUMANClaudin-1 OS=Homo sapiens OX=9606 GN=CLDN1 PE=1 SV=1	P	GO:0030336	negative regulation of cell migration
O95832	CLD1_HUMANClaudin-1 OS=Homo sapiens OX=9606 GN=CLDN1 PE=1 SV=1	P	GO:0032092	positive regulation of protein binding
O95832	CLD1_HUMANClaudin-1 OS=Homo sapiens OX=9606 GN=CLDN1 PE=1 SV=1	P	GO:0032496	response to lipopolysaccharide
O95832	CLD1_HUMANClaudin-1 OS=Homo sapiens OX=9606 GN=CLDN1 PE=1 SV=1	P	GO:0042538	hyperosmotic salinity response
O95832	CLD1_HUMANClaudin-1 OS=Homo sapiens OX=9606 GN=CLDN1 PE=1 SV=1	P	GO:0045471	response to ethanol
O95832	CLD1_HUMANClaudin-1 OS=Homo sapiens OX=9606 GN=CLDN1 PE=1 SV=1	P	GO:0046718	viral entry into host cell
O95832	CLD1_HUMANClaudin-1 OS=Homo sapiens OX=9606 GN=CLDN1 PE=1 SV=1	P	GO:0051260	protein homooligomerization
O95832	CLD1_HUMANClaudin-1 OS=Homo sapiens OX=9606 GN=CLDN1 PE=1 SV=1	P	GO:0051291	protein heterooligomerization
O95832	CLD1_HUMANClaudin-1 OS=Homo sapiens OX=9606 GN=CLDN1 PE=1 SV=1	P	GO:0060021	roof of mouth development
O95832	CLD1_HUMANClaudin-1 OS=Homo sapiens OX=9606 GN=CLDN1 PE=1 SV=1	P	GO:0060054	positive regulation of epithelial cell proliferation involved in wound healing
O95832	CLD1_HUMANClaudin-1 OS=Homo sapiens OX=9606 GN=CLDN1 PE=1 SV=1	P	GO:0060325	face morphogenesis
O95832	CLD1_HUMANClaudin-1 OS=Homo sapiens OX=9606 GN=CLDN1 PE=1 SV=1	P	GO:0061436	establishment of skin barrier
O95832	CLD1_HUMANClaudin-1 OS=Homo sapiens OX=9606 GN=CLDN1 PE=1 SV=1	P	GO:0061772	xenobiotic transport across blood-nerve barrier
O95832	CLD1_HUMANClaudin-1 OS=Homo sapiens OX=9606 GN=CLDN1 PE=1 SV=1	P	GO:0070293	renal absorption
O95832	CLD1_HUMANClaudin-1 OS=Homo sapiens OX=9606 GN=CLDN1 PE=1 SV=1	P	GO:0070673	response to interleukin-18
O95832	CLD1_HUMANClaudin-1 OS=Homo sapiens OX=9606 GN=CLDN1 PE=1 SV=1	P	GO:0071284	cellular response to lead ion
O95832	CLD1_HUMANClaudin-1 OS=Homo sapiens OX=9606 GN=CLDN1 PE=1 SV=1	P	GO:0071346	cellular response to interferon-gamma
O95832	CLD1_HUMANClaudin-1 OS=Homo sapiens OX=9606 GN=CLDN1 PE=1 SV=1	P	GO:0071356	cellular response to tumor necrosis factor
O95832	CLD1_HUMANClaudin-1 OS=Homo sapiens OX=9606 GN=CLDN1 PE=1 SV=1	P	GO:0071548	response to dexamethasone
O95832	CLD1_HUMANClaudin-1 OS=Homo sapiens OX=9606 GN=CLDN1 PE=1 SV=1	P	GO:0090303	positive regulation of wound healing
O95832	CLD1_HUMANClaudin-1 OS=Homo sapiens OX=9606 GN=CLDN1 PE=1 SV=1	P	GO:0090557	establishment of endothelial intestinal barrier
O95832	CLD1_HUMANClaudin-1 OS=Homo sapiens OX=9606 GN=CLDN1 PE=1 SV=1	P	GO:0090559	regulation of membrane permeability
O95832	CLD1_HUMANClaudin-1 OS=Homo sapiens OX=9606 GN=CLDN1 PE=1 SV=1	P	GO:0097421	liver regeneration
O95832	CLD1_HUMANClaudin-1 OS=Homo sapiens OX=9606 GN=CLDN1 PE=1 SV=1	P	GO:1903142	positive regulation of establishment of endothelial barrier
O95832	CLD1_HUMANClaudin-1 OS=Homo sapiens OX=9606 GN=CLDN1 PE=1 SV=1	P	GO:1903348	positive regulation of bicellular tight junction assembly
O95832	CLD1_HUMANClaudin-1 OS=Homo sapiens OX=9606 GN=CLDN1 PE=1 SV=1	P	GO:1903545	cellular response to butyrate
O95832	CLD1_HUMANClaudin-1 OS=Homo sapiens OX=9606 GN=CLDN1 PE=1 SV=1	P	GO:1990963	establishment of blood-retinal barrier
O95832	CLD1_HUMANClaudin-1 OS=Homo sapiens OX=9606 GN=CLDN1 PE=1 SV=1	P	GO:0006820	anion transport
P30530	UFO_HUMANTyrosine- kinase receptor UFO OS=Homo sapiens OX=9606 GN=AXL PE=1 SV=4	C	GO:0005730	nucleolus
P30530	UFO_HUMANTyrosine- kinase receptor UFO OS=Homo sapiens OX=9606 GN=AXL PE=1 SV=4	C	GO:0005829	cytosol
P30530	UFO_HUMANTyrosine- kinase receptor UFO OS=Homo sapiens OX=9606 GN=AXL PE=1 SV=4	C	GO:0005887	integral component of plasma membrane
P30530	UFO_HUMANTyrosine- kinase receptor UFO OS=Homo sapiens OX=9606 GN=AXL PE=1 SV=4	C	GO:0009925	basal plasma membrane
P30530	UFO_HUMANTyrosine- kinase receptor UFO OS=Homo sapiens OX=9606 GN=AXL PE=1 SV=4	C	GO:0009986	cell surface
P30530	UFO_HUMANTyrosine- kinase receptor UFO OS=Homo sapiens OX=9606 GN=AXL PE=1 SV=4	C	GO:0012505	endomembrane system
P30530	UFO_HUMANTyrosine- kinase receptor UFO OS=Homo sapiens OX=9606 GN=AXL PE=1 SV=4	C	GO:0015629	actin cytoskeleton
P30530	UFO_HUMANTyrosine- kinase receptor UFO OS=Homo sapiens OX=9606 GN=AXL PE=1 SV=4	C	GO:0016028	rhabdomere
P30530	UFO_HUMANTyrosine- kinase receptor UFO OS=Homo sapiens OX=9606 GN=AXL PE=1 SV=4	C	GO:0016604	nuclear body
P30530	UFO_HUMANTyrosine- kinase receptor UFO OS=Homo sapiens OX=9606 GN=AXL PE=1 SV=4	C	GO:0031090	organelle membrane
P30530	UFO_HUMANTyrosine- kinase receptor UFO OS=Homo sapiens OX=9606 GN=AXL PE=1 SV=4	C	GO:0043005	neuron projection
P30530	UFO_HUMANTyrosine- kinase receptor UFO OS=Homo sapiens OX=9606 GN=AXL PE=1 SV=4	C	GO:0043235	receptor complex
P30530	UFO_HUMANTyrosine- kinase receptor UFO OS=Homo sapiens OX=9606 GN=AXL PE=1 SV=4	C	GO:0044228	host cell surface
P30530	UFO_HUMANTyrosine- kinase receptor UFO OS=Homo sapiens OX=9606 GN=AXL PE=1 SV=4	C	GO:0048471	perinuclear region of cytoplasm
P30530	UFO_HUMANTyrosine- kinase receptor UFO OS=Homo sapiens OX=9606 GN=AXL PE=1 SV=4	C	GO:0098794	postsynapse
P30530	UFO_HUMANTyrosine- kinase receptor UFO OS=Homo sapiens OX=9606 GN=AXL PE=1 SV=4	C	GO:0120038	plasma membrane bounded cell projection part
P30530	UFO_HUMANTyrosine- kinase receptor UFO OS=Homo sapiens OX=9606 GN=AXL PE=1 SV=4	F	GO:0000287	magnesium ion binding
P30530	UFO_HUMANTyrosine- kinase receptor UFO OS=Homo sapiens OX=9606 GN=AXL PE=1 SV=4	F	GO:0000400	four-way junction DNA binding
P30530	UFO_HUMANTyrosine- kinase receptor UFO OS=Homo sapiens OX=9606 GN=AXL PE=1 SV=4	F	GO:0000405	bubble DNA binding
P30530	UFO_HUMANTyrosine- kinase receptor UFO OS=Homo sapiens OX=9606 GN=AXL PE=1 SV=4	F	GO:0001618	virus receptor activity
P30530	UFO_HUMANTyrosine- kinase receptor UFO OS=Homo sapiens OX=9606 GN=AXL PE=1 SV=4	F	GO:0001784	phosphotyrosine residue binding
P30530	UFO_HUMANTyrosine- kinase receptor UFO OS=Homo sapiens OX=9606 GN=AXL PE=1 SV=4	F	GO:0001786	phosphatidylserine binding
P30530	UFO_HUMANTyrosine- kinase receptor UFO OS=Homo sapiens OX=9606 GN=AXL PE=1 SV=4	F	GO:0003713	transcription coactivator activity
P30530	UFO_HUMANTyrosine- kinase receptor UFO OS=Homo sapiens OX=9606 GN=AXL PE=1 SV=4	F	GO:0003785	actin monomer binding
P30530	UFO_HUMANTyrosine- kinase receptor UFO OS=Homo sapiens OX=9606 GN=AXL PE=1 SV=4	F	GO:0004515	nicotinate-nucleotide adenylyltransferase activity
P30530	UFO_HUMANTyrosine- kinase receptor UFO OS=Homo sapiens OX=9606 GN=AXL PE=1 SV=4	F	GO:0004714	transmembrane receptor protein tyrosine kinase activity
P30530	UFO_HUMANTyrosine- kinase receptor UFO OS=Homo sapiens OX=9606 GN=AXL PE=1 SV=4	F	GO:0004715	non-membrane spanning protein tyrosine kinase activity
P30530	UFO_HUMANTyrosine- kinase receptor UFO OS=Homo sapiens OX=9606 GN=AXL PE=1 SV=4	F	GO:0005080	protein kinase C binding
P30530	UFO_HUMANTyrosine- kinase receptor UFO OS=Homo sapiens OX=9606 GN=AXL PE=1 SV=4	F	GO:0005520	insulin-like growth factor binding
P30530	UFO_HUMANTyrosine- kinase receptor UFO OS=Homo sapiens OX=9606 GN=AXL PE=1 SV=4	F	GO:0005524	ATP binding
P30530	UFO_HUMANTyrosine- kinase receptor UFO OS=Homo sapiens OX=9606 GN=AXL PE=1 SV=4	F	GO:0008022	protein C-terminus binding
P30530	UFO_HUMANTyrosine- kinase receptor UFO OS=Homo sapiens OX=9606 GN=AXL PE=1 SV=4	F	GO:0017124	SH3 domain binding
P30530	UFO_HUMANTyrosine- kinase receptor UFO OS=Homo sapiens OX=9606 GN=AXL PE=1 SV=4	F	GO:0019905	syntaxin binding
P30530	UFO_HUMANTyrosine- kinase receptor UFO OS=Homo sapiens OX=9606 GN=AXL PE=1 SV=4	F	GO:0030145	manganese ion binding
P30530	UFO_HUMANTyrosine- kinase receptor UFO OS=Homo sapiens OX=9606 GN=AXL PE=1 SV=4	F	GO:0038191	neuropilin binding
P30530	UFO_HUMANTyrosine- kinase receptor UFO OS=Homo sapiens OX=9606 GN=AXL PE=1 SV=4	F	GO:0042169	SH2 domain binding
P30530	UFO_HUMANTyrosine- kinase receptor UFO OS=Homo sapiens OX=9606 GN=AXL PE=1 SV=4	F	GO:0043548	phosphatidylinositol 3-kinase binding
P30530	UFO_HUMANTyrosine- kinase receptor UFO OS=Homo sapiens OX=9606 GN=AXL PE=1 SV=4	F	GO:0044877	protein-containing complex binding
P30530	UFO_HUMANTyrosine- kinase receptor UFO OS=Homo sapiens OX=9606 GN=AXL PE=1 SV=4	F	GO:0051019	mitogen-activated protein kinase binding
P30530	UFO_HUMANTyrosine- kinase receptor UFO OS=Homo sapiens OX=9606 GN=AXL PE=1 SV=4	F	GO:0070064	proline-rich region binding
P30530	UFO_HUMANTyrosine- kinase receptor UFO OS=Homo sapiens OX=9606 GN=AXL PE=1 SV=4	F	GO:0097100	supercoiled DNA binding
P30530	UFO_HUMANTyrosine- kinase receptor UFO OS=Homo sapiens OX=9606 GN=AXL PE=1 SV=4	F	GO:1990837	sequence-specific double-stranded DNA binding
P30530	UFO_HUMANTyrosine- kinase receptor UFO OS=Homo sapiens OX=9606 GN=AXL PE=1 SV=4	P	GO:0000278	mitotic cell cycle
P30530	UFO_HUMANTyrosine- kinase receptor UFO OS=Homo sapiens OX=9606 GN=AXL PE=1 SV=4	P	GO:0001764	neuron migration
P30530	UFO_HUMANTyrosine- kinase receptor UFO OS=Homo sapiens OX=9606 GN=AXL PE=1 SV=4	P	GO:0001779	natural killer cell differentiation
P30530	UFO_HUMANTyrosine- kinase receptor UFO OS=Homo sapiens OX=9606 GN=AXL PE=1 SV=4	P	GO:0001818	negative regulation of cytokine production
P30530	UFO_HUMANTyrosine- kinase receptor UFO OS=Homo sapiens OX=9606 GN=AXL PE=1 SV=4	P	GO:0001974	blood vessel remodeling
P30530	UFO_HUMANTyrosine- kinase receptor UFO OS=Homo sapiens OX=9606 GN=AXL PE=1 SV=4	P	GO:0006298	mismatch repair
P30530	UFO_HUMANTyrosine- kinase receptor UFO OS=Homo sapiens OX=9606 GN=AXL PE=1 SV=4	P	GO:0006975	DNA damage induced protein phosphorylation
P30530	UFO_HUMANTyrosine- kinase receptor UFO OS=Homo sapiens OX=9606 GN=AXL PE=1 SV=4	P	GO:0007050	cell cycle arrest
P30530	UFO_HUMANTyrosine- kinase receptor UFO OS=Homo sapiens OX=9606 GN=AXL PE=1 SV=4	P	GO:0007204	positive regulation of cytosolic calcium ion concentration
P30530	UFO_HUMANTyrosine- kinase receptor UFO OS=Homo sapiens OX=9606 GN=AXL PE=1 SV=4	P	GO:0007229	integrin-mediated signaling pathway
P30530	UFO_HUMANTyrosine- kinase receptor UFO OS=Homo sapiens OX=9606 GN=AXL PE=1 SV=4	P	GO:0007283	spermatogenesis
P30530	UFO_HUMANTyrosine- kinase receptor UFO OS=Homo sapiens OX=9606 GN=AXL PE=1 SV=4	P	GO:0007417	central nervous system development
P30530	UFO_HUMANTyrosine- kinase receptor UFO OS=Homo sapiens OX=9606 GN=AXL PE=1 SV=4	P	GO:0008284	positive regulation of cell population proliferation
P30530	UFO_HUMANTyrosine- kinase receptor UFO OS=Homo sapiens OX=9606 GN=AXL PE=1 SV=4	P	GO:0008630	intrinsic apoptotic signaling pathway in response to DNA damage
P30530	UFO_HUMANTyrosine- kinase receptor UFO OS=Homo sapiens OX=9606 GN=AXL PE=1 SV=4	P	GO:0010506	regulation of autophagy
P30530	UFO_HUMANTyrosine- kinase receptor UFO OS=Homo sapiens OX=9606 GN=AXL PE=1 SV=4	P	GO:0010595	positive regulation of endothelial cell migration
P30530	UFO_HUMANTyrosine- kinase receptor UFO OS=Homo sapiens OX=9606 GN=AXL PE=1 SV=4	P	GO:0030100	regulation of endocytosis
P30530	UFO_HUMANTyrosine- kinase receptor UFO OS=Homo sapiens OX=9606 GN=AXL PE=1 SV=4	P	GO:0030168	platelet activation
P30530	UFO_HUMANTyrosine- kinase receptor UFO OS=Homo sapiens OX=9606 GN=AXL PE=1 SV=4	P	GO:0030516	regulation of axon extension
P30530	UFO_HUMANTyrosine- kinase receptor UFO OS=Homo sapiens OX=9606 GN=AXL PE=1 SV=4	P	GO:0031100	animal organ regeneration
P30530	UFO_HUMANTyrosine- kinase receptor UFO OS=Homo sapiens OX=9606 GN=AXL PE=1 SV=4	P	GO:0031113	regulation of microtubule polymerization
P30530	UFO_HUMANTyrosine- kinase receptor UFO OS=Homo sapiens OX=9606 GN=AXL PE=1 SV=4	P	GO:0031347	regulation of defense response
P30530	UFO_HUMANTyrosine- kinase receptor UFO OS=Homo sapiens OX=9606 GN=AXL PE=1 SV=4	P	GO:0031668	cellular response to extracellular stimulus
P30530	UFO_HUMANTyrosine- kinase receptor UFO OS=Homo sapiens OX=9606 GN=AXL PE=1 SV=4	P	GO:0032101	regulation of response to external stimulus
P30530	UFO_HUMANTyrosine- kinase receptor UFO OS=Homo sapiens OX=9606 GN=AXL PE=1 SV=4	P	GO:0032489	regulation of Cdc42 protein signal transduction
P30530	UFO_HUMANTyrosine- kinase receptor UFO OS=Homo sapiens OX=9606 GN=AXL PE=1 SV=4	P	GO:0032940	secretion by cell
P30530	UFO_HUMANTyrosine- kinase receptor UFO OS=Homo sapiens OX=9606 GN=AXL PE=1 SV=4	P	GO:0034101	erythrocyte homeostasis
P30530	UFO_HUMANTyrosine- kinase receptor UFO OS=Homo sapiens OX=9606 GN=AXL PE=1 SV=4	P	GO:0035457	cellular response to interferon-alpha
P30530	UFO_HUMANTyrosine- kinase receptor UFO OS=Homo sapiens OX=9606 GN=AXL PE=1 SV=4	P	GO:0035791	platelet-derived growth factor receptor-beta signaling pathway
P30530	UFO_HUMANTyrosine- kinase receptor UFO OS=Homo sapiens OX=9606 GN=AXL PE=1 SV=4	P	GO:0038083	peptidyl-tyrosine autophosphorylation
P30530	UFO_HUMANTyrosine- kinase receptor UFO OS=Homo sapiens OX=9606 GN=AXL PE=1 SV=4	P	GO:0038096	Fc-gamma receptor signaling pathway involved in phagocytosis
P30530	UFO_HUMANTyrosine- kinase receptor UFO OS=Homo sapiens OX=9606 GN=AXL PE=1 SV=4	P	GO:0038189	neuropilin signaling pathway
P30530	UFO_HUMANTyrosine- kinase receptor UFO OS=Homo sapiens OX=9606 GN=AXL PE=1 SV=4	P	GO:0042698	ovulation cycle
P30530	UFO_HUMANTyrosine- kinase receptor UFO OS=Homo sapiens OX=9606 GN=AXL PE=1 SV=4	P	GO:0042770	signal transduction in response to DNA damage
P30530	UFO_HUMANTyrosine- kinase receptor UFO OS=Homo sapiens OX=9606 GN=AXL PE=1 SV=4	P	GO:0043065	positive regulation of apoptotic process
P30530	UFO_HUMANTyrosine- kinase receptor UFO OS=Homo sapiens OX=9606 GN=AXL PE=1 SV=4	P	GO:0043277	apoptotic cell clearance
P30530	UFO_HUMANTyrosine- kinase receptor UFO OS=Homo sapiens OX=9606 GN=AXL PE=1 SV=4	P	GO:0043408	regulation of MAPK cascade
P30530	UFO_HUMANTyrosine- kinase receptor UFO OS=Homo sapiens OX=9606 GN=AXL PE=1 SV=4	P	GO:0043524	negative regulation of neuron apoptotic process
P30530	UFO_HUMANTyrosine- kinase receptor UFO OS=Homo sapiens OX=9606 GN=AXL PE=1 SV=4	P	GO:0045087	innate immune response
P30530	UFO_HUMANTyrosine- kinase receptor UFO OS=Homo sapiens OX=9606 GN=AXL PE=1 SV=4	P	GO:0045184	establishment of protein localization
P30530	UFO_HUMANTyrosine- kinase receptor UFO OS=Homo sapiens OX=9606 GN=AXL PE=1 SV=4	P	GO:0045944	positive regulation of transcription by RNA polymerase II
P30530	UFO_HUMANTyrosine- kinase receptor UFO OS=Homo sapiens OX=9606 GN=AXL PE=1 SV=4	P	GO:0046718	viral entry into host cell
P30530	UFO_HUMANTyrosine- kinase receptor UFO OS=Homo sapiens OX=9606 GN=AXL PE=1 SV=4	P	GO:0048010	vascular endothelial growth factor receptor signaling pathway
P30530	UFO_HUMANTyrosine- kinase receptor UFO OS=Homo sapiens OX=9606 GN=AXL PE=1 SV=4	P	GO:0048015	phosphatidylinositol-mediated signaling
P30530	UFO_HUMANTyrosine- kinase receptor UFO OS=Homo sapiens OX=9606 GN=AXL PE=1 SV=4	P	GO:0048469	cell maturation
P30530	UFO_HUMANTyrosine- kinase receptor UFO OS=Homo sapiens OX=9606 GN=AXL PE=1 SV=4	P	GO:0048732	gland development
P30530	UFO_HUMANTyrosine- kinase receptor UFO OS=Homo sapiens OX=9606 GN=AXL PE=1 SV=4	P	GO:0050731	positive regulation of peptidyl-tyrosine phosphorylation
P30530	UFO_HUMANTyrosine- kinase receptor UFO OS=Homo sapiens OX=9606 GN=AXL PE=1 SV=4	P	GO:0050766	positive regulation of phagocytosis
P30530	UFO_HUMANTyrosine- kinase receptor UFO OS=Homo sapiens OX=9606 GN=AXL PE=1 SV=4	P	GO:0051149	positive regulation of muscle cell differentiation
P30530	UFO_HUMANTyrosine- kinase receptor UFO OS=Homo sapiens OX=9606 GN=AXL PE=1 SV=4	P	GO:0051250	negative regulation of lymphocyte activation
P30530	UFO_HUMANTyrosine- kinase receptor UFO OS=Homo sapiens OX=9606 GN=AXL PE=1 SV=4	P	GO:0051353	positive regulation of oxidoreductase activity
P30530	UFO_HUMANTyrosine- kinase receptor UFO OS=Homo sapiens OX=9606 GN=AXL PE=1 SV=4	P	GO:0051444	negative regulation of ubiquitin-protein transferase activity
P30530	UFO_HUMANTyrosine- kinase receptor UFO OS=Homo sapiens OX=9606 GN=AXL PE=1 SV=4	P	GO:0051496	positive regulation of stress fiber assembly
P30530	UFO_HUMANTyrosine- kinase receptor UFO OS=Homo sapiens OX=9606 GN=AXL PE=1 SV=4	P	GO:0051497	negative regulation of stress fiber assembly
P30530	UFO_HUMANTyrosine- kinase receptor UFO OS=Homo sapiens OX=9606 GN=AXL PE=1 SV=4	P	GO:0051882	mitochondrial depolarization
P30530	UFO_HUMANTyrosine- kinase receptor UFO OS=Homo sapiens OX=9606 GN=AXL PE=1 SV=4	P	GO:0051894	positive regulation of focal adhesion assembly
P30530	UFO_HUMANTyrosine- kinase receptor UFO OS=Homo sapiens OX=9606 GN=AXL PE=1 SV=4	P	GO:0051897	positive regulation of protein kinase B signaling
P30530	UFO_HUMANTyrosine- kinase receptor UFO OS=Homo sapiens OX=9606 GN=AXL PE=1 SV=4	P	GO:0060068	vagina development
P30530	UFO_HUMANTyrosine- kinase receptor UFO OS=Homo sapiens OX=9606 GN=AXL PE=1 SV=4	P	GO:0070301	cellular response to hydrogen peroxide
P30530	UFO_HUMANTyrosine- kinase receptor UFO OS=Homo sapiens OX=9606 GN=AXL PE=1 SV=4	P	GO:0071103	DNA conformation change
P30530	UFO_HUMANTyrosine- kinase receptor UFO OS=Homo sapiens OX=9606 GN=AXL PE=1 SV=4	P	GO:0071396	cellular response to lipid
P30530	UFO_HUMANTyrosine- kinase receptor UFO OS=Homo sapiens OX=9606 GN=AXL PE=1 SV=4	P	GO:0071901	negative regulation of protein serine/threonine kinase activity
P30530	UFO_HUMANTyrosine- kinase receptor UFO OS=Homo sapiens OX=9606 GN=AXL PE=1 SV=4	P	GO:0097350	neutrophil clearance
P30530	UFO_HUMANTyrosine- kinase receptor UFO OS=Homo sapiens OX=9606 GN=AXL PE=1 SV=4	P	GO:1900026	positive regulation of substrate adhesion-dependent cell spreading
P30530	UFO_HUMANTyrosine- kinase receptor UFO OS=Homo sapiens OX=9606 GN=AXL PE=1 SV=4	P	GO:1900275	negative regulation of phospholipase C activity
P30530	UFO_HUMANTyrosine- kinase receptor UFO OS=Homo sapiens OX=9606 GN=AXL PE=1 SV=4	P	GO:1902036	regulation of hematopoietic stem cell differentiation
P30530	UFO_HUMANTyrosine- kinase receptor UFO OS=Homo sapiens OX=9606 GN=AXL PE=1 SV=4	P	GO:1902532	negative regulation of intracellular signal transduction
P30530	UFO_HUMANTyrosine- kinase receptor UFO OS=Homo sapiens OX=9606 GN=AXL PE=1 SV=4	P	GO:1903351	cellular response to dopamine
P30530	UFO_HUMANTyrosine- kinase receptor UFO OS=Homo sapiens OX=9606 GN=AXL PE=1 SV=4	P	GO:1904528	positive regulation of microtubule binding
P30530	UFO_HUMANTyrosine- kinase receptor UFO OS=Homo sapiens OX=9606 GN=AXL PE=1 SV=4	P	GO:1904531	positive regulation of actin filament binding
P30530	UFO_HUMANTyrosine- kinase receptor UFO OS=Homo sapiens OX=9606 GN=AXL PE=1 SV=4	P	GO:1990051	activation of protein kinase C activity
P30530	UFO_HUMANTyrosine- kinase receptor UFO OS=Homo sapiens OX=9606 GN=AXL PE=1 SV=4	P	GO:2000251	positive regulation of actin cytoskeleton reorganization
P30530	UFO_HUMANTyrosine- kinase receptor UFO OS=Homo sapiens OX=9606 GN=AXL PE=1 SV=4	P	GO:2000669	negative regulation of dendritic cell apoptotic process
P30530	UFO_HUMANTyrosine- kinase receptor UFO OS=Homo sapiens OX=9606 GN=AXL PE=1 SV=4	P	GO:2001020	regulation of response to DNA damage stimulus
P30530	UFO_HUMANTyrosine- kinase receptor UFO OS=Homo sapiens OX=9606 GN=AXL PE=1 SV=4	C	GO:0005667	transcription factor complex
P30530	UFO_HUMANTyrosine- kinase receptor UFO OS=Homo sapiens OX=9606 GN=AXL PE=1 SV=4	P	GO:0045941	positive regulation of transcription, DNA-templated
P30530	UFO_HUMANTyrosine- kinase receptor UFO OS=Homo sapiens OX=9606 GN=AXL PE=1 SV=4	P	GO:0019357	nicotinate nucleotide biosynthetic process
P30530	UFO_HUMANTyrosine- kinase receptor UFO OS=Homo sapiens OX=9606 GN=AXL PE=1 SV=4	C	GO:0016942	insulin-like growth factor binding protein complex
Q13885	TBB2A_HUMANTubulin beta-2A chain OS=Homo sapiens OX=9606 GN=TUBB2A PE=1 SV=1	C	GO:0005641	nuclear envelope lumen
Q13885	TBB2A_HUMANTubulin beta-2A chain OS=Homo sapiens OX=9606 GN=TUBB2A PE=1 SV=1	C	GO:0005829	cytosol
Q13885	TBB2A_HUMANTubulin beta-2A chain OS=Homo sapiens OX=9606 GN=TUBB2A PE=1 SV=1	C	GO:0005874	microtubule
Q13885	TBB2A_HUMANTubulin beta-2A chain OS=Homo sapiens OX=9606 GN=TUBB2A PE=1 SV=1	C	GO:0045121	membrane raft
Q13885	TBB2A_HUMANTubulin beta-2A chain OS=Homo sapiens OX=9606 GN=TUBB2A PE=1 SV=1	C	GO:0072687	meiotic spindle
Q13885	TBB2A_HUMANTubulin beta-2A chain OS=Homo sapiens OX=9606 GN=TUBB2A PE=1 SV=1	F	GO:0003924	GTPase activity
Q13885	TBB2A_HUMANTubulin beta-2A chain OS=Homo sapiens OX=9606 GN=TUBB2A PE=1 SV=1	F	GO:0005200	structural constituent of cytoskeleton
Q13885	TBB2A_HUMANTubulin beta-2A chain OS=Homo sapiens OX=9606 GN=TUBB2A PE=1 SV=1	F	GO:0005525	GTP binding
Q13885	TBB2A_HUMANTubulin beta-2A chain OS=Homo sapiens OX=9606 GN=TUBB2A PE=1 SV=1	F	GO:0019904	protein domain specific binding
Q13885	TBB2A_HUMANTubulin beta-2A chain OS=Homo sapiens OX=9606 GN=TUBB2A PE=1 SV=1	F	GO:0031625	ubiquitin protein ligase binding
Q13885	TBB2A_HUMANTubulin beta-2A chain OS=Homo sapiens OX=9606 GN=TUBB2A PE=1 SV=1	F	GO:0032794	GTPase activating protein binding
Q13885	TBB2A_HUMANTubulin beta-2A chain OS=Homo sapiens OX=9606 GN=TUBB2A PE=1 SV=1	F	GO:0042288	MHC class I protein binding
Q13885	TBB2A_HUMANTubulin beta-2A chain OS=Homo sapiens OX=9606 GN=TUBB2A PE=1 SV=1	F	GO:0044877	protein-containing complex binding
Q13885	TBB2A_HUMANTubulin beta-2A chain OS=Homo sapiens OX=9606 GN=TUBB2A PE=1 SV=1	F	GO:1990890	netrin receptor binding
Q13885	TBB2A_HUMANTubulin beta-2A chain OS=Homo sapiens OX=9606 GN=TUBB2A PE=1 SV=1	P	GO:0001556	oocyte maturation
Q13885	TBB2A_HUMANTubulin beta-2A chain OS=Homo sapiens OX=9606 GN=TUBB2A PE=1 SV=1	P	GO:0001764	neuron migration
Q13885	TBB2A_HUMANTubulin beta-2A chain OS=Homo sapiens OX=9606 GN=TUBB2A PE=1 SV=1	P	GO:0007056	spindle assembly involved in female meiosis
Q13885	TBB2A_HUMANTubulin beta-2A chain OS=Homo sapiens OX=9606 GN=TUBB2A PE=1 SV=1	P	GO:0010389	regulation of G2/M transition of mitotic cell cycle
Q13885	TBB2A_HUMANTubulin beta-2A chain OS=Homo sapiens OX=9606 GN=TUBB2A PE=1 SV=1	P	GO:0042267	natural killer cell mediated cytotoxicity
Q13885	TBB2A_HUMANTubulin beta-2A chain OS=Homo sapiens OX=9606 GN=TUBB2A PE=1 SV=1	P	GO:0043312	neutrophil degranulation
Q13885	TBB2A_HUMANTubulin beta-2A chain OS=Homo sapiens OX=9606 GN=TUBB2A PE=1 SV=1	P	GO:0050807	regulation of synapse organization
Q13885	TBB2A_HUMANTubulin beta-2A chain OS=Homo sapiens OX=9606 GN=TUBB2A PE=1 SV=1	P	GO:0051301	cell division
Q13885	TBB2A_HUMANTubulin beta-2A chain OS=Homo sapiens OX=9606 GN=TUBB2A PE=1 SV=1	P	GO:0097711	ciliary basal body-plasma membrane docking
Q13885	TBB2A_HUMANTubulin beta-2A chain OS=Homo sapiens OX=9606 GN=TUBB2A PE=1 SV=1	P	GO:0007165	signal transduction
Q13885	TBB2A_HUMANTubulin beta-2A chain OS=Homo sapiens OX=9606 GN=TUBB2A PE=1 SV=1	C	GO:0042612	MHC class I protein complex
Q99942	RNF5_HUMANE3 ubiquitin- ligase RNF5 OS=Homo sapiens OX=9606 GN=RNF5 PE=1 SV=1	C	GO:0005634	nucleus
Q99942	RNF5_HUMANE3 ubiquitin- ligase RNF5 OS=Homo sapiens OX=9606 GN=RNF5 PE=1 SV=1	C	GO:0005779	integral component of peroxisomal membrane
Q99942	RNF5_HUMANE3 ubiquitin- ligase RNF5 OS=Homo sapiens OX=9606 GN=RNF5 PE=1 SV=1	C	GO:0005789	endoplasmic reticulum membrane
Q99942	RNF5_HUMANE3 ubiquitin- ligase RNF5 OS=Homo sapiens OX=9606 GN=RNF5 PE=1 SV=1	C	GO:0031966	mitochondrial membrane
Q99942	RNF5_HUMANE3 ubiquitin- ligase RNF5 OS=Homo sapiens OX=9606 GN=RNF5 PE=1 SV=1	C	GO:0044322	endoplasmic reticulum quality control compartment
Q99942	RNF5_HUMANE3 ubiquitin- ligase RNF5 OS=Homo sapiens OX=9606 GN=RNF5 PE=1 SV=1	F	GO:0008022	protein C-terminus binding
Q99942	RNF5_HUMANE3 ubiquitin- ligase RNF5 OS=Homo sapiens OX=9606 GN=RNF5 PE=1 SV=1	F	GO:0008270	zinc ion binding
Q99942	RNF5_HUMANE3 ubiquitin- ligase RNF5 OS=Homo sapiens OX=9606 GN=RNF5 PE=1 SV=1	F	GO:0042802	identical protein binding
Q99942	RNF5_HUMANE3 ubiquitin- ligase RNF5 OS=Homo sapiens OX=9606 GN=RNF5 PE=1 SV=1	F	GO:0043130	ubiquitin binding
Q99942	RNF5_HUMANE3 ubiquitin- ligase RNF5 OS=Homo sapiens OX=9606 GN=RNF5 PE=1 SV=1	F	GO:0044390	ubiquitin-like protein conjugating enzyme binding
Q99942	RNF5_HUMANE3 ubiquitin- ligase RNF5 OS=Homo sapiens OX=9606 GN=RNF5 PE=1 SV=1	F	GO:0044877	protein-containing complex binding
Q99942	RNF5_HUMANE3 ubiquitin- ligase RNF5 OS=Homo sapiens OX=9606 GN=RNF5 PE=1 SV=1	F	GO:0061630	ubiquitin protein ligase activity
Q99942	RNF5_HUMANE3 ubiquitin- ligase RNF5 OS=Homo sapiens OX=9606 GN=RNF5 PE=1 SV=1	P	GO:0009617	response to bacterium
Q99942	RNF5_HUMANE3 ubiquitin- ligase RNF5 OS=Homo sapiens OX=9606 GN=RNF5 PE=1 SV=1	P	GO:0010507	negative regulation of autophagy
Q99942	RNF5_HUMANE3 ubiquitin- ligase RNF5 OS=Homo sapiens OX=9606 GN=RNF5 PE=1 SV=1	P	GO:0016558	protein import into peroxisome matrix
Q99942	RNF5_HUMANE3 ubiquitin- ligase RNF5 OS=Homo sapiens OX=9606 GN=RNF5 PE=1 SV=1	P	GO:0030433	ubiquitin-dependent ERAD pathway
Q99942	RNF5_HUMANE3 ubiquitin- ligase RNF5 OS=Homo sapiens OX=9606 GN=RNF5 PE=1 SV=1	P	GO:0031648	protein destabilization
Q99942	RNF5_HUMANE3 ubiquitin- ligase RNF5 OS=Homo sapiens OX=9606 GN=RNF5 PE=1 SV=1	P	GO:0051865	protein autoubiquitination
Q99942	RNF5_HUMANE3 ubiquitin- ligase RNF5 OS=Homo sapiens OX=9606 GN=RNF5 PE=1 SV=1	P	GO:0070534	protein K63-linked ubiquitination
Q99942	RNF5_HUMANE3 ubiquitin- ligase RNF5 OS=Homo sapiens OX=9606 GN=RNF5 PE=1 SV=1	P	GO:0070936	protein K48-linked ubiquitination
Q99942	RNF5_HUMANE3 ubiquitin- ligase RNF5 OS=Homo sapiens OX=9606 GN=RNF5 PE=1 SV=1	P	GO:0071712	ER-associated misfolded protein catabolic process
Q99942	RNF5_HUMANE3 ubiquitin- ligase RNF5 OS=Homo sapiens OX=9606 GN=RNF5 PE=1 SV=1	P	GO:1904294	positive regulation of ERAD pathway
Q99942	RNF5_HUMANE3 ubiquitin- ligase RNF5 OS=Homo sapiens OX=9606 GN=RNF5 PE=1 SV=1	P	GO:1904380	endoplasmic reticulum mannose trimming
Q99942	RNF5_HUMANE3 ubiquitin- ligase RNF5 OS=Homo sapiens OX=9606 GN=RNF5 PE=1 SV=1	P	GO:2000785	regulation of autophagosome assembly
Q96HE7	ERO1A_HUMANERO1 alpha OS=Homo sapiens OX=9606 GN=ERO1A PE=1 SV=2	C	GO:0005788	endoplasmic reticulum lumen
Q96HE7	ERO1A_HUMANERO1 alpha OS=Homo sapiens OX=9606 GN=ERO1A PE=1 SV=2	C	GO:0005789	endoplasmic reticulum membrane
Q96HE7	ERO1A_HUMANERO1 alpha OS=Homo sapiens OX=9606 GN=ERO1A PE=1 SV=2	F	GO:0003756	protein disulfide isomerase activity
Q96HE7	ERO1A_HUMANERO1 alpha OS=Homo sapiens OX=9606 GN=ERO1A PE=1 SV=2	F	GO:0015035	protein disulfide oxidoreductase activity
Q96HE7	ERO1A_HUMANERO1 alpha OS=Homo sapiens OX=9606 GN=ERO1A PE=1 SV=2	F	GO:0016671	oxidoreductase activity, acting on a sulfur group of donors, disulfide as acceptor
Q96HE7	ERO1A_HUMANERO1 alpha OS=Homo sapiens OX=9606 GN=ERO1A PE=1 SV=2	F	GO:0051082	unfolded protein binding
Q96HE7	ERO1A_HUMANERO1 alpha OS=Homo sapiens OX=9606 GN=ERO1A PE=1 SV=2	P	GO:0019471	4-hydroxyproline metabolic process
Q96HE7	ERO1A_HUMANERO1 alpha OS=Homo sapiens OX=9606 GN=ERO1A PE=1 SV=2	P	GO:0022417	protein maturation by protein folding
Q96HE7	ERO1A_HUMANERO1 alpha OS=Homo sapiens OX=9606 GN=ERO1A PE=1 SV=2	P	GO:0030070	insulin processing
Q96HE7	ERO1A_HUMANERO1 alpha OS=Homo sapiens OX=9606 GN=ERO1A PE=1 SV=2	P	GO:0030198	extracellular matrix organization
Q96HE7	ERO1A_HUMANERO1 alpha OS=Homo sapiens OX=9606 GN=ERO1A PE=1 SV=2	P	GO:0034975	protein folding in endoplasmic reticulum
Q96HE7	ERO1A_HUMANERO1 alpha OS=Homo sapiens OX=9606 GN=ERO1A PE=1 SV=2	P	GO:0042593	glucose homeostasis
Q96HE7	ERO1A_HUMANERO1 alpha OS=Homo sapiens OX=9606 GN=ERO1A PE=1 SV=2	P	GO:0045454	cell redox homeostasis
Q96HE7	ERO1A_HUMANERO1 alpha OS=Homo sapiens OX=9606 GN=ERO1A PE=1 SV=2	P	GO:0055114	oxidation-reduction process
Q96HE7	ERO1A_HUMANERO1 alpha OS=Homo sapiens OX=9606 GN=ERO1A PE=1 SV=2	P	GO:0070059	intrinsic apoptotic signaling pathway in response to endoplasmic reticulum stress
Q96HE7	ERO1A_HUMANERO1 alpha OS=Homo sapiens OX=9606 GN=ERO1A PE=1 SV=2	P	GO:0006118	obsolete electron transport
Q9NXK6	PAQR5_HUMANMembrane progestin receptor gamma OS=Homo sapiens OX=9606 GN=PAQR5 PE=1 SV=2	C	GO:0005886	plasma membrane
Q9NXK6	PAQR5_HUMANMembrane progestin receptor gamma OS=Homo sapiens OX=9606 GN=PAQR5 PE=1 SV=2	C	GO:0016021	integral component of membrane
Q9NXK6	PAQR5_HUMANMembrane progestin receptor gamma OS=Homo sapiens OX=9606 GN=PAQR5 PE=1 SV=2	F	GO:0005496	steroid binding
Q9NXK6	PAQR5_HUMANMembrane progestin receptor gamma OS=Homo sapiens OX=9606 GN=PAQR5 PE=1 SV=2	F	GO:0005515	protein binding
Q9NXK6	PAQR5_HUMANMembrane progestin receptor gamma OS=Homo sapiens OX=9606 GN=PAQR5 PE=1 SV=2	F	GO:0038023	signaling receptor activity
Q9NXK6	PAQR5_HUMANMembrane progestin receptor gamma OS=Homo sapiens OX=9606 GN=PAQR5 PE=1 SV=2	P	GO:0001933	negative regulation of protein phosphorylation
Q9NXK6	PAQR5_HUMANMembrane progestin receptor gamma OS=Homo sapiens OX=9606 GN=PAQR5 PE=1 SV=2	P	GO:0007165	signal transduction
Q9NXK6	PAQR5_HUMANMembrane progestin receptor gamma OS=Homo sapiens OX=9606 GN=PAQR5 PE=1 SV=2	P	GO:0009725	response to hormone
Q9NXK6	PAQR5_HUMANMembrane progestin receptor gamma OS=Homo sapiens OX=9606 GN=PAQR5 PE=1 SV=2	P	GO:0048477	oogenesis
Q9NXK6	PAQR5_HUMANMembrane progestin receptor gamma OS=Homo sapiens OX=9606 GN=PAQR5 PE=1 SV=2	P	GO:0048731	system development
P11234	RALB_HUMANRas-related Ral-B OS=Homo sapiens OX=9606 GN=RALB PE=1 SV=1	C	GO:0005634	nucleus
P11234	RALB_HUMANRas-related Ral-B OS=Homo sapiens OX=9606 GN=RALB PE=1 SV=1	C	GO:0005769	early endosome
P11234	RALB_HUMANRas-related Ral-B OS=Homo sapiens OX=9606 GN=RALB PE=1 SV=1	C	GO:0005770	late endosome
P11234	RALB_HUMANRas-related Ral-B OS=Homo sapiens OX=9606 GN=RALB PE=1 SV=1	C	GO:0005794	Golgi apparatus
P11234	RALB_HUMANRas-related Ral-B OS=Homo sapiens OX=9606 GN=RALB PE=1 SV=1	C	GO:0005811	lipid droplet
P11234	RALB_HUMANRas-related Ral-B OS=Homo sapiens OX=9606 GN=RALB PE=1 SV=1	C	GO:0005829	cytosol
P11234	RALB_HUMANRas-related Ral-B OS=Homo sapiens OX=9606 GN=RALB PE=1 SV=1	C	GO:0030054	cell junction
P11234	RALB_HUMANRas-related Ral-B OS=Homo sapiens OX=9606 GN=RALB PE=1 SV=1	C	GO:0030139	endocytic vesicle
P11234	RALB_HUMANRas-related Ral-B OS=Homo sapiens OX=9606 GN=RALB PE=1 SV=1	C	GO:0032154	cleavage furrow
P11234	RALB_HUMANRas-related Ral-B OS=Homo sapiens OX=9606 GN=RALB PE=1 SV=1	C	GO:0035577	azurophil granule membrane
P11234	RALB_HUMANRas-related Ral-B OS=Homo sapiens OX=9606 GN=RALB PE=1 SV=1	C	GO:0044297	cell body
P11234	RALB_HUMANRas-related Ral-B OS=Homo sapiens OX=9606 GN=RALB PE=1 SV=1	C	GO:0045121	membrane raft
P11234	RALB_HUMANRas-related Ral-B OS=Homo sapiens OX=9606 GN=RALB PE=1 SV=1	C	GO:0070821	tertiary granule membrane
P11234	RALB_HUMANRas-related Ral-B OS=Homo sapiens OX=9606 GN=RALB PE=1 SV=1	C	GO:0090543	Flemming body
P11234	RALB_HUMANRas-related Ral-B OS=Homo sapiens OX=9606 GN=RALB PE=1 SV=1	C	GO:0097447	dendritic tree
P11234	RALB_HUMANRas-related Ral-B OS=Homo sapiens OX=9606 GN=RALB PE=1 SV=1	C	GO:0098978	glutamatergic synapse
P11234	RALB_HUMANRas-related Ral-B OS=Homo sapiens OX=9606 GN=RALB PE=1 SV=1	F	GO:0003924	GTPase activity
P11234	RALB_HUMANRas-related Ral-B OS=Homo sapiens OX=9606 GN=RALB PE=1 SV=1	F	GO:0005516	calmodulin binding
P11234	RALB_HUMANRas-related Ral-B OS=Homo sapiens OX=9606 GN=RALB PE=1 SV=1	F	GO:0005525	GTP binding
P11234	RALB_HUMANRas-related Ral-B OS=Homo sapiens OX=9606 GN=RALB PE=1 SV=1	F	GO:0008022	protein C-terminus binding
P11234	RALB_HUMANRas-related Ral-B OS=Homo sapiens OX=9606 GN=RALB PE=1 SV=1	F	GO:0017034	Rap guanyl-nucleotide exchange factor activity
P11234	RALB_HUMANRas-related Ral-B OS=Homo sapiens OX=9606 GN=RALB PE=1 SV=1	F	GO:0019003	GDP binding
P11234	RALB_HUMANRas-related Ral-B OS=Homo sapiens OX=9606 GN=RALB PE=1 SV=1	F	GO:0030215	semaphorin receptor binding
P11234	RALB_HUMANRas-related Ral-B OS=Homo sapiens OX=9606 GN=RALB PE=1 SV=1	F	GO:0031625	ubiquitin protein ligase binding
P11234	RALB_HUMANRas-related Ral-B OS=Homo sapiens OX=9606 GN=RALB PE=1 SV=1	F	GO:0031755	Edg-2 lysophosphatidic acid receptor binding
P11234	RALB_HUMANRas-related Ral-B OS=Homo sapiens OX=9606 GN=RALB PE=1 SV=1	F	GO:0042802	identical protein binding
P11234	RALB_HUMANRas-related Ral-B OS=Homo sapiens OX=9606 GN=RALB PE=1 SV=1	F	GO:0044877	protein-containing complex binding
P11234	RALB_HUMANRas-related Ral-B OS=Homo sapiens OX=9606 GN=RALB PE=1 SV=1	F	GO:0051117	ATPase binding
P11234	RALB_HUMANRas-related Ral-B OS=Homo sapiens OX=9606 GN=RALB PE=1 SV=1	P	GO:0001843	neural tube closure
P11234	RALB_HUMANRas-related Ral-B OS=Homo sapiens OX=9606 GN=RALB PE=1 SV=1	P	GO:0001928	regulation of exocyst assembly
P11234	RALB_HUMANRas-related Ral-B OS=Homo sapiens OX=9606 GN=RALB PE=1 SV=1	P	GO:0002223	stimulatory C-type lectin receptor signaling pathway
P11234	RALB_HUMANRas-related Ral-B OS=Homo sapiens OX=9606 GN=RALB PE=1 SV=1	P	GO:0006915	apoptotic process
P11234	RALB_HUMANRas-related Ral-B OS=Homo sapiens OX=9606 GN=RALB PE=1 SV=1	P	GO:0006935	chemotaxis
P11234	RALB_HUMANRas-related Ral-B OS=Homo sapiens OX=9606 GN=RALB PE=1 SV=1	P	GO:0007050	cell cycle arrest
P11234	RALB_HUMANRas-related Ral-B OS=Homo sapiens OX=9606 GN=RALB PE=1 SV=1	P	GO:0007093	mitotic cell cycle checkpoint
P11234	RALB_HUMANRas-related Ral-B OS=Homo sapiens OX=9606 GN=RALB PE=1 SV=1	P	GO:0008285	negative regulation of cell population proliferation
P11234	RALB_HUMANRas-related Ral-B OS=Homo sapiens OX=9606 GN=RALB PE=1 SV=1	P	GO:0009267	cellular response to starvation
P11234	RALB_HUMANRas-related Ral-B OS=Homo sapiens OX=9606 GN=RALB PE=1 SV=1	P	GO:0009743	response to carbohydrate
P11234	RALB_HUMANRas-related Ral-B OS=Homo sapiens OX=9606 GN=RALB PE=1 SV=1	P	GO:0009887	animal organ morphogenesis
P11234	RALB_HUMANRas-related Ral-B OS=Homo sapiens OX=9606 GN=RALB PE=1 SV=1	P	GO:0010629	negative regulation of gene expression
P11234	RALB_HUMANRas-related Ral-B OS=Homo sapiens OX=9606 GN=RALB PE=1 SV=1	P	GO:0010863	positive regulation of phospholipase C activity
P11234	RALB_HUMANRas-related Ral-B OS=Homo sapiens OX=9606 GN=RALB PE=1 SV=1	P	GO:0010976	positive regulation of neuron projection development
P11234	RALB_HUMANRas-related Ral-B OS=Homo sapiens OX=9606 GN=RALB PE=1 SV=1	P	GO:0030033	microvillus assembly
P11234	RALB_HUMANRas-related Ral-B OS=Homo sapiens OX=9606 GN=RALB PE=1 SV=1	P	GO:0030100	regulation of endocytosis
P11234	RALB_HUMANRas-related Ral-B OS=Homo sapiens OX=9606 GN=RALB PE=1 SV=1	P	GO:0030335	positive regulation of cell migration
P11234	RALB_HUMANRas-related Ral-B OS=Homo sapiens OX=9606 GN=RALB PE=1 SV=1	P	GO:0032091	negative regulation of protein binding
P11234	RALB_HUMANRas-related Ral-B OS=Homo sapiens OX=9606 GN=RALB PE=1 SV=1	P	GO:0032092	positive regulation of protein binding
P11234	RALB_HUMANRas-related Ral-B OS=Homo sapiens OX=9606 GN=RALB PE=1 SV=1	P	GO:0032486	Rap protein signal transduction
P11234	RALB_HUMANRas-related Ral-B OS=Homo sapiens OX=9606 GN=RALB PE=1 SV=1	P	GO:0032489	regulation of Cdc42 protein signal transduction
P11234	RALB_HUMANRas-related Ral-B OS=Homo sapiens OX=9606 GN=RALB PE=1 SV=1	P	GO:0032507	maintenance of protein location in cell
P11234	RALB_HUMANRas-related Ral-B OS=Homo sapiens OX=9606 GN=RALB PE=1 SV=1	P	GO:0033625	positive regulation of integrin activation
P11234	RALB_HUMANRas-related Ral-B OS=Homo sapiens OX=9606 GN=RALB PE=1 SV=1	P	GO:0034260	negative regulation of GTPase activity
P11234	RALB_HUMANRas-related Ral-B OS=Homo sapiens OX=9606 GN=RALB PE=1 SV=1	P	GO:0035722	interleukin-12-mediated signaling pathway
P11234	RALB_HUMANRas-related Ral-B OS=Homo sapiens OX=9606 GN=RALB PE=1 SV=1	P	GO:0038180	nerve growth factor signaling pathway
P11234	RALB_HUMANRas-related Ral-B OS=Homo sapiens OX=9606 GN=RALB PE=1 SV=1	P	GO:0042493	response to drug
P11234	RALB_HUMANRas-related Ral-B OS=Homo sapiens OX=9606 GN=RALB PE=1 SV=1	P	GO:0042592	homeostatic process
P11234	RALB_HUMANRas-related Ral-B OS=Homo sapiens OX=9606 GN=RALB PE=1 SV=1	P	GO:0043312	neutrophil degranulation
P11234	RALB_HUMANRas-related Ral-B OS=Homo sapiens OX=9606 GN=RALB PE=1 SV=1	P	GO:0043406	positive regulation of MAP kinase activity
P11234	RALB_HUMANRas-related Ral-B OS=Homo sapiens OX=9606 GN=RALB PE=1 SV=1	P	GO:0043547	positive regulation of GTPase activity
P11234	RALB_HUMANRas-related Ral-B OS=Homo sapiens OX=9606 GN=RALB PE=1 SV=1	P	GO:0045944	positive regulation of transcription by RNA polymerase II
P11234	RALB_HUMANRas-related Ral-B OS=Homo sapiens OX=9606 GN=RALB PE=1 SV=1	P	GO:0046330	positive regulation of JNK cascade
P11234	RALB_HUMANRas-related Ral-B OS=Homo sapiens OX=9606 GN=RALB PE=1 SV=1	P	GO:0048013	ephrin receptor signaling pathway
P11234	RALB_HUMANRas-related Ral-B OS=Homo sapiens OX=9606 GN=RALB PE=1 SV=1	P	GO:0050679	positive regulation of epithelial cell proliferation
P11234	RALB_HUMANRas-related Ral-B OS=Homo sapiens OX=9606 GN=RALB PE=1 SV=1	P	GO:0050796	regulation of insulin secretion
P11234	RALB_HUMANRas-related Ral-B OS=Homo sapiens OX=9606 GN=RALB PE=1 SV=1	P	GO:0050848	regulation of calcium-mediated signaling
P11234	RALB_HUMANRas-related Ral-B OS=Homo sapiens OX=9606 GN=RALB PE=1 SV=1	P	GO:0051301	cell division
P11234	RALB_HUMANRas-related Ral-B OS=Homo sapiens OX=9606 GN=RALB PE=1 SV=1	P	GO:0051491	positive regulation of filopodium assembly
P11234	RALB_HUMANRas-related Ral-B OS=Homo sapiens OX=9606 GN=RALB PE=1 SV=1	P	GO:0051665	membrane raft localization
P11234	RALB_HUMANRas-related Ral-B OS=Homo sapiens OX=9606 GN=RALB PE=1 SV=1	P	GO:0060178	regulation of exocyst localization
P11234	RALB_HUMANRas-related Ral-B OS=Homo sapiens OX=9606 GN=RALB PE=1 SV=1	P	GO:0061024	membrane organization
P11234	RALB_HUMANRas-related Ral-B OS=Homo sapiens OX=9606 GN=RALB PE=1 SV=1	P	GO:0061028	establishment of endothelial barrier
P11234	RALB_HUMANRas-related Ral-B OS=Homo sapiens OX=9606 GN=RALB PE=1 SV=1	P	GO:0070374	positive regulation of ERK1 and ERK2 cascade
P11234	RALB_HUMANRas-related Ral-B OS=Homo sapiens OX=9606 GN=RALB PE=1 SV=1	P	GO:0071320	cellular response to cAMP
P11234	RALB_HUMANRas-related Ral-B OS=Homo sapiens OX=9606 GN=RALB PE=1 SV=1	P	GO:0071360	cellular response to exogenous dsRNA
P11234	RALB_HUMANRas-related Ral-B OS=Homo sapiens OX=9606 GN=RALB PE=1 SV=1	P	GO:0071480	cellular response to gamma radiation
P11234	RALB_HUMANRas-related Ral-B OS=Homo sapiens OX=9606 GN=RALB PE=1 SV=1	P	GO:0072659	protein localization to plasma membrane
P11234	RALB_HUMANRas-related Ral-B OS=Homo sapiens OX=9606 GN=RALB PE=1 SV=1	P	GO:0090303	positive regulation of wound healing
P11234	RALB_HUMANRas-related Ral-B OS=Homo sapiens OX=9606 GN=RALB PE=1 SV=1	P	GO:0090314	positive regulation of protein targeting to membrane
P11234	RALB_HUMANRas-related Ral-B OS=Homo sapiens OX=9606 GN=RALB PE=1 SV=1	P	GO:0090398	cellular senescence
P11234	RALB_HUMANRas-related Ral-B OS=Homo sapiens OX=9606 GN=RALB PE=1 SV=1	P	GO:0098696	regulation of neurotransmitter receptor localization to postsynaptic specialization membrane
P11234	RALB_HUMANRas-related Ral-B OS=Homo sapiens OX=9606 GN=RALB PE=1 SV=1	P	GO:1900029	positive regulation of ruffle assembly
P11234	RALB_HUMANRas-related Ral-B OS=Homo sapiens OX=9606 GN=RALB PE=1 SV=1	P	GO:1901888	regulation of cell junction assembly
P11234	RALB_HUMANRas-related Ral-B OS=Homo sapiens OX=9606 GN=RALB PE=1 SV=1	P	GO:2000114	regulation of establishment of cell polarity
P11234	RALB_HUMANRas-related Ral-B OS=Homo sapiens OX=9606 GN=RALB PE=1 SV=1	P	GO:2000251	positive regulation of actin cytoskeleton reorganization
P11234	RALB_HUMANRas-related Ral-B OS=Homo sapiens OX=9606 GN=RALB PE=1 SV=1	P	GO:2000301	negative regulation of synaptic vesicle exocytosis
P11234	RALB_HUMANRas-related Ral-B OS=Homo sapiens OX=9606 GN=RALB PE=1 SV=1	P	GO:2000630	positive regulation of miRNA metabolic process
P11234	RALB_HUMANRas-related Ral-B OS=Homo sapiens OX=9606 GN=RALB PE=1 SV=1	P	GO:2000786	positive regulation of autophagosome assembly
P11234	RALB_HUMANRas-related Ral-B OS=Homo sapiens OX=9606 GN=RALB PE=1 SV=1	P	GO:2001214	positive regulation of vasculogenesis
P01584	IL1B_HUMANInterleukin-1 beta OS=Homo sapiens OX=9606 GN=IL1B PE=1 SV=2	C	GO:0005764	lysosome
P01584	IL1B_HUMANInterleukin-1 beta OS=Homo sapiens OX=9606 GN=IL1B PE=1 SV=2	C	GO:0005829	cytosol
P01584	IL1B_HUMANInterleukin-1 beta OS=Homo sapiens OX=9606 GN=IL1B PE=1 SV=2	C	GO:0030141	secretory granule
P01584	IL1B_HUMANInterleukin-1 beta OS=Homo sapiens OX=9606 GN=IL1B PE=1 SV=2	C	GO:0070062	extracellular exosome
P01584	IL1B_HUMANInterleukin-1 beta OS=Homo sapiens OX=9606 GN=IL1B PE=1 SV=2	F	GO:0005125	cytokine activity
P01584	IL1B_HUMANInterleukin-1 beta OS=Homo sapiens OX=9606 GN=IL1B PE=1 SV=2	F	GO:0005149	interleukin-1 receptor binding
P01584	IL1B_HUMANInterleukin-1 beta OS=Homo sapiens OX=9606 GN=IL1B PE=1 SV=2	F	GO:0005152	interleukin-1 receptor antagonist activity
P01584	IL1B_HUMANInterleukin-1 beta OS=Homo sapiens OX=9606 GN=IL1B PE=1 SV=2	F	GO:0005178	integrin binding
P01584	IL1B_HUMANInterleukin-1 beta OS=Homo sapiens OX=9606 GN=IL1B PE=1 SV=2	F	GO:0019904	protein domain specific binding
P01584	IL1B_HUMANInterleukin-1 beta OS=Homo sapiens OX=9606 GN=IL1B PE=1 SV=2	P	GO:0000187	activation of MAPK activity
P01584	IL1B_HUMANInterleukin-1 beta OS=Homo sapiens OX=9606 GN=IL1B PE=1 SV=2	P	GO:0001818	negative regulation of cytokine production
P01584	IL1B_HUMANInterleukin-1 beta OS=Homo sapiens OX=9606 GN=IL1B PE=1 SV=2	P	GO:0007566	embryo implantation
P01584	IL1B_HUMANInterleukin-1 beta OS=Homo sapiens OX=9606 GN=IL1B PE=1 SV=2	P	GO:0008285	negative regulation of cell population proliferation
P01584	IL1B_HUMANInterleukin-1 beta OS=Homo sapiens OX=9606 GN=IL1B PE=1 SV=2	P	GO:0009743	response to carbohydrate
P01584	IL1B_HUMANInterleukin-1 beta OS=Homo sapiens OX=9606 GN=IL1B PE=1 SV=2	P	GO:0010575	positive regulation of vascular endothelial growth factor production
P01584	IL1B_HUMANInterleukin-1 beta OS=Homo sapiens OX=9606 GN=IL1B PE=1 SV=2	P	GO:0010718	positive regulation of epithelial to mesenchymal transition
P01584	IL1B_HUMANInterleukin-1 beta OS=Homo sapiens OX=9606 GN=IL1B PE=1 SV=2	P	GO:0010829	negative regulation of glucose transmembrane transport
P01584	IL1B_HUMANInterleukin-1 beta OS=Homo sapiens OX=9606 GN=IL1B PE=1 SV=2	P	GO:0014805	smooth muscle adaptation
P01584	IL1B_HUMANInterleukin-1 beta OS=Homo sapiens OX=9606 GN=IL1B PE=1 SV=2	P	GO:0030213	hyaluronan biosynthetic process
P01584	IL1B_HUMANInterleukin-1 beta OS=Homo sapiens OX=9606 GN=IL1B PE=1 SV=2	P	GO:0030335	positive regulation of cell migration
P01584	IL1B_HUMANInterleukin-1 beta OS=Homo sapiens OX=9606 GN=IL1B PE=1 SV=2	P	GO:0030593	neutrophil chemotaxis
P01584	IL1B_HUMANInterleukin-1 beta OS=Homo sapiens OX=9606 GN=IL1B PE=1 SV=2	P	GO:0030730	sequestering of triglyceride
P01584	IL1B_HUMANInterleukin-1 beta OS=Homo sapiens OX=9606 GN=IL1B PE=1 SV=2	P	GO:0030949	positive regulation of vascular endothelial growth factor receptor signaling pathway
P01584	IL1B_HUMANInterleukin-1 beta OS=Homo sapiens OX=9606 GN=IL1B PE=1 SV=2	P	GO:0031394	positive regulation of prostaglandin biosynthetic process
P01584	IL1B_HUMANInterleukin-1 beta OS=Homo sapiens OX=9606 GN=IL1B PE=1 SV=2	P	GO:0031622	positive regulation of fever generation
P01584	IL1B_HUMANInterleukin-1 beta OS=Homo sapiens OX=9606 GN=IL1B PE=1 SV=2	P	GO:0031663	lipopolysaccharide-mediated signaling pathway
P01584	IL1B_HUMANInterleukin-1 beta OS=Homo sapiens OX=9606 GN=IL1B PE=1 SV=2	P	GO:0032308	positive regulation of prostaglandin secretion
P01584	IL1B_HUMANInterleukin-1 beta OS=Homo sapiens OX=9606 GN=IL1B PE=1 SV=2	P	GO:0032611	interleukin-1 beta production
P01584	IL1B_HUMANInterleukin-1 beta OS=Homo sapiens OX=9606 GN=IL1B PE=1 SV=2	P	GO:0032725	positive regulation of granulocyte macrophage colony-stimulating factor production
P01584	IL1B_HUMANInterleukin-1 beta OS=Homo sapiens OX=9606 GN=IL1B PE=1 SV=2	P	GO:0032729	positive regulation of interferon-gamma production
P01584	IL1B_HUMANInterleukin-1 beta OS=Homo sapiens OX=9606 GN=IL1B PE=1 SV=2	P	GO:0032757	positive regulation of interleukin-8 production
P01584	IL1B_HUMANInterleukin-1 beta OS=Homo sapiens OX=9606 GN=IL1B PE=1 SV=2	P	GO:0033129	positive regulation of histone phosphorylation
P01584	IL1B_HUMANInterleukin-1 beta OS=Homo sapiens OX=9606 GN=IL1B PE=1 SV=2	P	GO:0033198	response to ATP
P01584	IL1B_HUMANInterleukin-1 beta OS=Homo sapiens OX=9606 GN=IL1B PE=1 SV=2	P	GO:0034116	positive regulation of heterotypic cell-cell adhesion
P01584	IL1B_HUMANInterleukin-1 beta OS=Homo sapiens OX=9606 GN=IL1B PE=1 SV=2	P	GO:0035066	positive regulation of histone acetylation
P01584	IL1B_HUMANInterleukin-1 beta OS=Homo sapiens OX=9606 GN=IL1B PE=1 SV=2	P	GO:0035234	ectopic germ cell programmed cell death
P01584	IL1B_HUMANInterleukin-1 beta OS=Homo sapiens OX=9606 GN=IL1B PE=1 SV=2	P	GO:0035505	positive regulation of myosin light chain kinase activity
P01584	IL1B_HUMANInterleukin-1 beta OS=Homo sapiens OX=9606 GN=IL1B PE=1 SV=2	P	GO:0035690	cellular response to drug
P01584	IL1B_HUMANInterleukin-1 beta OS=Homo sapiens OX=9606 GN=IL1B PE=1 SV=2	P	GO:0042102	positive regulation of T cell proliferation
P01584	IL1B_HUMANInterleukin-1 beta OS=Homo sapiens OX=9606 GN=IL1B PE=1 SV=2	P	GO:0043123	positive regulation of I-kappaB kinase/NF-kappaB signaling
P01584	IL1B_HUMANInterleukin-1 beta OS=Homo sapiens OX=9606 GN=IL1B PE=1 SV=2	P	GO:0043407	negative regulation of MAP kinase activity
P01584	IL1B_HUMANInterleukin-1 beta OS=Homo sapiens OX=9606 GN=IL1B PE=1 SV=2	P	GO:0043491	protein kinase B signaling
P01584	IL1B_HUMANInterleukin-1 beta OS=Homo sapiens OX=9606 GN=IL1B PE=1 SV=2	P	GO:0045080	positive regulation of chemokine biosynthetic process
P01584	IL1B_HUMANInterleukin-1 beta OS=Homo sapiens OX=9606 GN=IL1B PE=1 SV=2	P	GO:0045086	positive regulation of interleukin-2 biosynthetic process
P01584	IL1B_HUMANInterleukin-1 beta OS=Homo sapiens OX=9606 GN=IL1B PE=1 SV=2	P	GO:0045410	positive regulation of interleukin-6 biosynthetic process
P01584	IL1B_HUMANInterleukin-1 beta OS=Homo sapiens OX=9606 GN=IL1B PE=1 SV=2	P	GO:0045429	positive regulation of nitric oxide biosynthetic process
P01584	IL1B_HUMANInterleukin-1 beta OS=Homo sapiens OX=9606 GN=IL1B PE=1 SV=2	P	GO:0045766	positive regulation of angiogenesis
P01584	IL1B_HUMANInterleukin-1 beta OS=Homo sapiens OX=9606 GN=IL1B PE=1 SV=2	P	GO:0045840	positive regulation of mitotic nuclear division
P01584	IL1B_HUMANInterleukin-1 beta OS=Homo sapiens OX=9606 GN=IL1B PE=1 SV=2	P	GO:0045917	positive regulation of complement activation
P01584	IL1B_HUMANInterleukin-1 beta OS=Homo sapiens OX=9606 GN=IL1B PE=1 SV=2	P	GO:0045944	positive regulation of transcription by RNA polymerase II
P01584	IL1B_HUMANInterleukin-1 beta OS=Homo sapiens OX=9606 GN=IL1B PE=1 SV=2	P	GO:0046330	positive regulation of JNK cascade
P01584	IL1B_HUMANInterleukin-1 beta OS=Homo sapiens OX=9606 GN=IL1B PE=1 SV=2	P	GO:0046627	negative regulation of insulin receptor signaling pathway
P01584	IL1B_HUMANInterleukin-1 beta OS=Homo sapiens OX=9606 GN=IL1B PE=1 SV=2	P	GO:0046827	positive regulation of protein export from nucleus
P01584	IL1B_HUMANInterleukin-1 beta OS=Homo sapiens OX=9606 GN=IL1B PE=1 SV=2	P	GO:0048143	astrocyte activation
P01584	IL1B_HUMANInterleukin-1 beta OS=Homo sapiens OX=9606 GN=IL1B PE=1 SV=2	P	GO:0050691	regulation of defense response to virus by host
P01584	IL1B_HUMANInterleukin-1 beta OS=Homo sapiens OX=9606 GN=IL1B PE=1 SV=2	P	GO:0050766	positive regulation of phagocytosis
P01584	IL1B_HUMANInterleukin-1 beta OS=Homo sapiens OX=9606 GN=IL1B PE=1 SV=2	P	GO:0050768	negative regulation of neurogenesis
P01584	IL1B_HUMANInterleukin-1 beta OS=Homo sapiens OX=9606 GN=IL1B PE=1 SV=2	P	GO:0050796	regulation of insulin secretion
P01584	IL1B_HUMANInterleukin-1 beta OS=Homo sapiens OX=9606 GN=IL1B PE=1 SV=2	P	GO:0050805	negative regulation of synaptic transmission
P01584	IL1B_HUMANInterleukin-1 beta OS=Homo sapiens OX=9606 GN=IL1B PE=1 SV=2	P	GO:0050995	negative regulation of lipid catabolic process
P01584	IL1B_HUMANInterleukin-1 beta OS=Homo sapiens OX=9606 GN=IL1B PE=1 SV=2	P	GO:0050996	positive regulation of lipid catabolic process
P01584	IL1B_HUMANInterleukin-1 beta OS=Homo sapiens OX=9606 GN=IL1B PE=1 SV=2	P	GO:0050999	regulation of nitric-oxide synthase activity
P01584	IL1B_HUMANInterleukin-1 beta OS=Homo sapiens OX=9606 GN=IL1B PE=1 SV=2	P	GO:0051044	positive regulation of membrane protein ectodomain proteolysis
P01584	IL1B_HUMANInterleukin-1 beta OS=Homo sapiens OX=9606 GN=IL1B PE=1 SV=2	P	GO:0051092	positive regulation of NF-kappaB transcription factor activity
P01584	IL1B_HUMANInterleukin-1 beta OS=Homo sapiens OX=9606 GN=IL1B PE=1 SV=2	P	GO:0051781	positive regulation of cell division
P01584	IL1B_HUMANInterleukin-1 beta OS=Homo sapiens OX=9606 GN=IL1B PE=1 SV=2	P	GO:0060252	positive regulation of glial cell proliferation
P01584	IL1B_HUMANInterleukin-1 beta OS=Homo sapiens OX=9606 GN=IL1B PE=1 SV=2	P	GO:0060355	positive regulation of cell adhesion molecule production
P01584	IL1B_HUMANInterleukin-1 beta OS=Homo sapiens OX=9606 GN=IL1B PE=1 SV=2	P	GO:0060559	positive regulation of calcidiol 1-monooxygenase activity
P01584	IL1B_HUMANInterleukin-1 beta OS=Homo sapiens OX=9606 GN=IL1B PE=1 SV=2	P	GO:0070164	negative regulation of adiponectin secretion
P01584	IL1B_HUMANInterleukin-1 beta OS=Homo sapiens OX=9606 GN=IL1B PE=1 SV=2	P	GO:0070372	regulation of ERK1 and ERK2 cascade
P01584	IL1B_HUMANInterleukin-1 beta OS=Homo sapiens OX=9606 GN=IL1B PE=1 SV=2	P	GO:0070487	monocyte aggregation
P01584	IL1B_HUMANInterleukin-1 beta OS=Homo sapiens OX=9606 GN=IL1B PE=1 SV=2	P	GO:0070498	interleukin-1-mediated signaling pathway
P01584	IL1B_HUMANInterleukin-1 beta OS=Homo sapiens OX=9606 GN=IL1B PE=1 SV=2	P	GO:0071260	cellular response to mechanical stimulus
P01584	IL1B_HUMANInterleukin-1 beta OS=Homo sapiens OX=9606 GN=IL1B PE=1 SV=2	P	GO:0071407	cellular response to organic cyclic compound
P01584	IL1B_HUMANInterleukin-1 beta OS=Homo sapiens OX=9606 GN=IL1B PE=1 SV=2	P	GO:0071639	positive regulation of monocyte chemotactic protein-1 production
P01584	IL1B_HUMANInterleukin-1 beta OS=Homo sapiens OX=9606 GN=IL1B PE=1 SV=2	P	GO:0150078	positive regulation of neuroinflammatory response
P01584	IL1B_HUMANInterleukin-1 beta OS=Homo sapiens OX=9606 GN=IL1B PE=1 SV=2	P	GO:1900745	positive regulation of p38MAPK cascade
P01584	IL1B_HUMANInterleukin-1 beta OS=Homo sapiens OX=9606 GN=IL1B PE=1 SV=2	P	GO:1901224	positive regulation of NIK/NF-kappaB signaling
P01584	IL1B_HUMANInterleukin-1 beta OS=Homo sapiens OX=9606 GN=IL1B PE=1 SV=2	P	GO:1903140	regulation of establishment of endothelial barrier
P01584	IL1B_HUMANInterleukin-1 beta OS=Homo sapiens OX=9606 GN=IL1B PE=1 SV=2	P	GO:1903597	negative regulation of gap junction assembly
P01584	IL1B_HUMANInterleukin-1 beta OS=Homo sapiens OX=9606 GN=IL1B PE=1 SV=2	P	GO:2000556	positive regulation of T-helper 1 cell cytokine production
P01584	IL1B_HUMANInterleukin-1 beta OS=Homo sapiens OX=9606 GN=IL1B PE=1 SV=2	P	GO:2000778	positive regulation of interleukin-6 secretion
P01584	IL1B_HUMANInterleukin-1 beta OS=Homo sapiens OX=9606 GN=IL1B PE=1 SV=2	P	GO:2001240	negative regulation of extrinsic apoptotic signaling pathway in absence of ligand
P01584	IL1B_HUMANInterleukin-1 beta OS=Homo sapiens OX=9606 GN=IL1B PE=1 SV=2	P	GO:0040007	growth
P01584	IL1B_HUMANInterleukin-1 beta OS=Homo sapiens OX=9606 GN=IL1B PE=1 SV=2	C	GO:0045323	interleukin-1 receptor complex
P01584	IL1B_HUMANInterleukin-1 beta OS=Homo sapiens OX=9606 GN=IL1B PE=1 SV=2	C	GO:0008305	integrin complex
Q9C002	NMES1_HUMANNormal mucosa of esophagus-specific gene 1 OS=Homo sapiens OX=9606 GN=NMES1 PE=2 SV=1	C	GO:0005634	nucleus
Q9C002	NMES1_HUMANNormal mucosa of esophagus-specific gene 1 OS=Homo sapiens OX=9606 GN=NMES1 PE=2 SV=1	C	GO:0005751	mitochondrial respiratory chain complex IV
Q9C002	NMES1_HUMANNormal mucosa of esophagus-specific gene 1 OS=Homo sapiens OX=9606 GN=NMES1 PE=2 SV=1	F	GO:0004129	cytochrome-c oxidase activity
Q9C002	NMES1_HUMANNormal mucosa of esophagus-specific gene 1 OS=Homo sapiens OX=9606 GN=NMES1 PE=2 SV=1	F	GO:0005488	binding
Q9C002	NMES1_HUMANNormal mucosa of esophagus-specific gene 1 OS=Homo sapiens OX=9606 GN=NMES1 PE=2 SV=1	P	GO:0009617	response to bacterium
Q9C002	NMES1_HUMANNormal mucosa of esophagus-specific gene 1 OS=Homo sapiens OX=9606 GN=NMES1 PE=2 SV=1	P	GO:1902600	proton transmembrane transport
Q9C002	NMES1_HUMANNormal mucosa of esophagus-specific gene 1 OS=Homo sapiens OX=9606 GN=NMES1 PE=2 SV=1	P	GO:0006123	mitochondrial electron transport, cytochrome c to oxygen
Q9C002	NMES1_HUMANNormal mucosa of esophagus-specific gene 1 OS=Homo sapiens OX=9606 GN=NMES1 PE=2 SV=1	P	GO:0015992	proton transmembrane transport
Q8NDC0	MISSL_HUMANMAPK-interacting and spindle-stabilizing -like OS=Homo sapiens OX=9606 GN=MAPK1IP1L PE=1 SV=4	F	GO:0005515	protein binding
P23921	RIR1_HUMANRibonucleoside-diphosphate reductase large subunit OS=Homo sapiens OX=9606 GN=RRM1 PE=1 SV=1	C	GO:0005635	nuclear envelope
P23921	RIR1_HUMANRibonucleoside-diphosphate reductase large subunit OS=Homo sapiens OX=9606 GN=RRM1 PE=1 SV=1	C	GO:0005971	ribonucleoside-diphosphate reductase complex
P23921	RIR1_HUMANRibonucleoside-diphosphate reductase large subunit OS=Homo sapiens OX=9606 GN=RRM1 PE=1 SV=1	C	GO:0042995	cell projection
P23921	RIR1_HUMANRibonucleoside-diphosphate reductase large subunit OS=Homo sapiens OX=9606 GN=RRM1 PE=1 SV=1	C	GO:0043025	neuronal cell body
P23921	RIR1_HUMANRibonucleoside-diphosphate reductase large subunit OS=Homo sapiens OX=9606 GN=RRM1 PE=1 SV=1	F	GO:0004748	ribonucleoside-diphosphate reductase activity, thioredoxin disulfide as acceptor
P23921	RIR1_HUMANRibonucleoside-diphosphate reductase large subunit OS=Homo sapiens OX=9606 GN=RRM1 PE=1 SV=1	F	GO:0005524	ATP binding
P23921	RIR1_HUMANRibonucleoside-diphosphate reductase large subunit OS=Homo sapiens OX=9606 GN=RRM1 PE=1 SV=1	F	GO:0042802	identical protein binding
P23921	RIR1_HUMANRibonucleoside-diphosphate reductase large subunit OS=Homo sapiens OX=9606 GN=RRM1 PE=1 SV=1	F	GO:0097718	disordered domain specific binding
P23921	RIR1_HUMANRibonucleoside-diphosphate reductase large subunit OS=Homo sapiens OX=9606 GN=RRM1 PE=1 SV=1	P	GO:0000278	mitotic cell cycle
P23921	RIR1_HUMANRibonucleoside-diphosphate reductase large subunit OS=Homo sapiens OX=9606 GN=RRM1 PE=1 SV=1	P	GO:0006206	pyrimidine nucleobase metabolic process
P23921	RIR1_HUMANRibonucleoside-diphosphate reductase large subunit OS=Homo sapiens OX=9606 GN=RRM1 PE=1 SV=1	P	GO:0006260	DNA replication
P23921	RIR1_HUMANRibonucleoside-diphosphate reductase large subunit OS=Homo sapiens OX=9606 GN=RRM1 PE=1 SV=1	P	GO:0008584	male gonad development
P23921	RIR1_HUMANRibonucleoside-diphosphate reductase large subunit OS=Homo sapiens OX=9606 GN=RRM1 PE=1 SV=1	P	GO:0009263	deoxyribonucleotide biosynthetic process
P23921	RIR1_HUMANRibonucleoside-diphosphate reductase large subunit OS=Homo sapiens OX=9606 GN=RRM1 PE=1 SV=1	P	GO:0010212	response to ionizing radiation
P23921	RIR1_HUMANRibonucleoside-diphosphate reductase large subunit OS=Homo sapiens OX=9606 GN=RRM1 PE=1 SV=1	P	GO:0015949	nucleobase-containing small molecule interconversion
P23921	RIR1_HUMANRibonucleoside-diphosphate reductase large subunit OS=Homo sapiens OX=9606 GN=RRM1 PE=1 SV=1	P	GO:0021846	cell proliferation in forebrain
P23921	RIR1_HUMANRibonucleoside-diphosphate reductase large subunit OS=Homo sapiens OX=9606 GN=RRM1 PE=1 SV=1	P	GO:0051290	protein heterotetramerization
P23921	RIR1_HUMANRibonucleoside-diphosphate reductase large subunit OS=Homo sapiens OX=9606 GN=RRM1 PE=1 SV=1	P	GO:0055114	oxidation-reduction process
P23921	RIR1_HUMANRibonucleoside-diphosphate reductase large subunit OS=Homo sapiens OX=9606 GN=RRM1 PE=1 SV=1	P	GO:0060041	retina development in camera-type eye
P23921	RIR1_HUMANRibonucleoside-diphosphate reductase large subunit OS=Homo sapiens OX=9606 GN=RRM1 PE=1 SV=1	P	GO:0006144	purine nucleobase metabolic process
P23921	RIR1_HUMANRibonucleoside-diphosphate reductase large subunit OS=Homo sapiens OX=9606 GN=RRM1 PE=1 SV=1	P	GO:0009186	deoxyribonucleoside diphosphate metabolic process
Q6P9B6	MEAK7_HUMANMTOR-associated MEAK7 OS=Homo sapiens OX=9606 GN=MEAK7 PE=1 SV=2	C	GO:0005765	lysosomal membrane
Q6P9B6	MEAK7_HUMANMTOR-associated MEAK7 OS=Homo sapiens OX=9606 GN=MEAK7 PE=1 SV=2	F	GO:0005515	protein binding
Q6P9B6	MEAK7_HUMANMTOR-associated MEAK7 OS=Homo sapiens OX=9606 GN=MEAK7 PE=1 SV=2	P	GO:0030334	regulation of cell migration
Q6P9B6	MEAK7_HUMANMTOR-associated MEAK7 OS=Homo sapiens OX=9606 GN=MEAK7 PE=1 SV=2	P	GO:0031323	regulation of cellular metabolic process
Q6P9B6	MEAK7_HUMANMTOR-associated MEAK7 OS=Homo sapiens OX=9606 GN=MEAK7 PE=1 SV=2	P	GO:0031667	response to nutrient levels
Q6P9B6	MEAK7_HUMANMTOR-associated MEAK7 OS=Homo sapiens OX=9606 GN=MEAK7 PE=1 SV=2	P	GO:0031929	TOR signaling
Q6P9B6	MEAK7_HUMANMTOR-associated MEAK7 OS=Homo sapiens OX=9606 GN=MEAK7 PE=1 SV=2	P	GO:0032868	response to insulin
Q6P9B6	MEAK7_HUMANMTOR-associated MEAK7 OS=Homo sapiens OX=9606 GN=MEAK7 PE=1 SV=2	P	GO:0042127	regulation of cell population proliferation
Q6P9B6	MEAK7_HUMANMTOR-associated MEAK7 OS=Homo sapiens OX=9606 GN=MEAK7 PE=1 SV=2	P	GO:0043200	response to amino acid
Q6P9B6	MEAK7_HUMANMTOR-associated MEAK7 OS=Homo sapiens OX=9606 GN=MEAK7 PE=1 SV=2	P	GO:0051171	regulation of nitrogen compound metabolic process
Q6P9B6	MEAK7_HUMANMTOR-associated MEAK7 OS=Homo sapiens OX=9606 GN=MEAK7 PE=1 SV=2	P	GO:0060255	regulation of macromolecule metabolic process
Q6P9B6	MEAK7_HUMANMTOR-associated MEAK7 OS=Homo sapiens OX=9606 GN=MEAK7 PE=1 SV=2	P	GO:0080090	regulation of primary metabolic process
Q6P9B6	MEAK7_HUMANMTOR-associated MEAK7 OS=Homo sapiens OX=9606 GN=MEAK7 PE=1 SV=2	P	GO:0150032	positive regulation of protein localization to lysosome
Q6P9B6	MEAK7_HUMANMTOR-associated MEAK7 OS=Homo sapiens OX=9606 GN=MEAK7 PE=1 SV=2	P	GO:1903204	negative regulation of oxidative stress-induced neuron death
Q9BXN6	SPNXD_HUMANSperm associated with the nucleus on the X chromosome D OS=Homo sapiens OX=9606 GN=SPANXD PE=1 SV=1	C	GO:0005634	nucleus
Q9BXN6	SPNXD_HUMANSperm associated with the nucleus on the X chromosome D OS=Homo sapiens OX=9606 GN=SPANXD PE=1 SV=1	C	GO:0005737	cytoplasm
Q9BXN6	SPNXD_HUMANSperm associated with the nucleus on the X chromosome D OS=Homo sapiens OX=9606 GN=SPANXD PE=1 SV=1	F	GO:0005515	protein binding
Q9BXN6	SPNXD_HUMANSperm associated with the nucleus on the X chromosome D OS=Homo sapiens OX=9606 GN=SPANXD PE=1 SV=1	P	GO:0007286	spermatid development
Q6JBY9	CPZIP_HUMAN -interacting OS=Homo sapiens OX=9606 GN=RCSD1 PE=1 SV=1	C	GO:0005884	actin filament
Q6JBY9	CPZIP_HUMAN -interacting OS=Homo sapiens OX=9606 GN=RCSD1 PE=1 SV=1	C	GO:0043231	intracellular membrane-bounded organelle
Q6JBY9	CPZIP_HUMAN -interacting OS=Homo sapiens OX=9606 GN=RCSD1 PE=1 SV=1	C	GO:0044444	cytoplasmic part
Q6JBY9	CPZIP_HUMAN -interacting OS=Homo sapiens OX=9606 GN=RCSD1 PE=1 SV=1	F	GO:0051015	actin filament binding
Q6JBY9	CPZIP_HUMAN -interacting OS=Homo sapiens OX=9606 GN=RCSD1 PE=1 SV=1	P	GO:0003009	skeletal muscle contraction
Q6JBY9	CPZIP_HUMAN -interacting OS=Homo sapiens OX=9606 GN=RCSD1 PE=1 SV=1	P	GO:0008104	protein localization
Q6JBY9	CPZIP_HUMAN -interacting OS=Homo sapiens OX=9606 GN=RCSD1 PE=1 SV=1	P	GO:0051641	cellular localization
Q6JBY9	CPZIP_HUMAN -interacting OS=Homo sapiens OX=9606 GN=RCSD1 PE=1 SV=1	P	GO:0071474	cellular hyperosmotic response
Q01432	AMPD3_HUMANAMP deaminase 3 OS=Homo sapiens OX=9606 GN=AMPD3 PE=1 SV=1	C	GO:0005576	extracellular region
Q01432	AMPD3_HUMANAMP deaminase 3 OS=Homo sapiens OX=9606 GN=AMPD3 PE=1 SV=1	C	GO:0005829	cytosol
Q01432	AMPD3_HUMANAMP deaminase 3 OS=Homo sapiens OX=9606 GN=AMPD3 PE=1 SV=1	C	GO:0034774	secretory granule lumen
Q01432	AMPD3_HUMANAMP deaminase 3 OS=Homo sapiens OX=9606 GN=AMPD3 PE=1 SV=1	C	GO:1904813	ficolin-1-rich granule lumen
Q01432	AMPD3_HUMANAMP deaminase 3 OS=Homo sapiens OX=9606 GN=AMPD3 PE=1 SV=1	F	GO:0003876	AMP deaminase activity
Q01432	AMPD3_HUMANAMP deaminase 3 OS=Homo sapiens OX=9606 GN=AMPD3 PE=1 SV=1	F	GO:0005515	protein binding
Q01432	AMPD3_HUMANAMP deaminase 3 OS=Homo sapiens OX=9606 GN=AMPD3 PE=1 SV=1	F	GO:0046872	metal ion binding
Q01432	AMPD3_HUMANAMP deaminase 3 OS=Homo sapiens OX=9606 GN=AMPD3 PE=1 SV=1	P	GO:0006196	AMP catabolic process
Q01432	AMPD3_HUMANAMP deaminase 3 OS=Homo sapiens OX=9606 GN=AMPD3 PE=1 SV=1	P	GO:0032264	IMP salvage
Q01432	AMPD3_HUMANAMP deaminase 3 OS=Homo sapiens OX=9606 GN=AMPD3 PE=1 SV=1	P	GO:0034101	erythrocyte homeostasis
Q01432	AMPD3_HUMANAMP deaminase 3 OS=Homo sapiens OX=9606 GN=AMPD3 PE=1 SV=1	P	GO:0043312	neutrophil degranulation
Q01432	AMPD3_HUMANAMP deaminase 3 OS=Homo sapiens OX=9606 GN=AMPD3 PE=1 SV=1	P	GO:0046031	ADP metabolic process
Q01432	AMPD3_HUMANAMP deaminase 3 OS=Homo sapiens OX=9606 GN=AMPD3 PE=1 SV=1	P	GO:0046034	ATP metabolic process
Q01432	AMPD3_HUMANAMP deaminase 3 OS=Homo sapiens OX=9606 GN=AMPD3 PE=1 SV=1	P	GO:0046039	GTP metabolic process
Q01432	AMPD3_HUMANAMP deaminase 3 OS=Homo sapiens OX=9606 GN=AMPD3 PE=1 SV=1	P	GO:0052652	cyclic purine nucleotide metabolic process
Q01432	AMPD3_HUMANAMP deaminase 3 OS=Homo sapiens OX=9606 GN=AMPD3 PE=1 SV=1	P	GO:0097009	energy homeostasis
Q01432	AMPD3_HUMANAMP deaminase 3 OS=Homo sapiens OX=9606 GN=AMPD3 PE=1 SV=1	P	GO:0006144	purine nucleobase metabolic process
P28288	ABCD3_HUMANATP-binding cassette sub-family D member 3 OS=Homo sapiens OX=9606 GN=ABCD3 PE=1 SV=1	C	GO:0005740	mitochondrial envelope
P28288	ABCD3_HUMANATP-binding cassette sub-family D member 3 OS=Homo sapiens OX=9606 GN=ABCD3 PE=1 SV=1	C	GO:0005778	peroxisomal membrane
P28288	ABCD3_HUMANATP-binding cassette sub-family D member 3 OS=Homo sapiens OX=9606 GN=ABCD3 PE=1 SV=1	C	GO:0005782	peroxisomal matrix
P28288	ABCD3_HUMANATP-binding cassette sub-family D member 3 OS=Homo sapiens OX=9606 GN=ABCD3 PE=1 SV=1	C	GO:0005789	endoplasmic reticulum membrane
P28288	ABCD3_HUMANATP-binding cassette sub-family D member 3 OS=Homo sapiens OX=9606 GN=ABCD3 PE=1 SV=1	C	GO:0005829	cytosol
P28288	ABCD3_HUMANATP-binding cassette sub-family D member 3 OS=Homo sapiens OX=9606 GN=ABCD3 PE=1 SV=1	C	GO:0031301	integral component of organelle membrane
P28288	ABCD3_HUMANATP-binding cassette sub-family D member 3 OS=Homo sapiens OX=9606 GN=ABCD3 PE=1 SV=1	C	GO:0098590	plasma membrane region
P28288	ABCD3_HUMANATP-binding cassette sub-family D member 3 OS=Homo sapiens OX=9606 GN=ABCD3 PE=1 SV=1	F	GO:0005324	long-chain fatty acid transporter activity
P28288	ABCD3_HUMANATP-binding cassette sub-family D member 3 OS=Homo sapiens OX=9606 GN=ABCD3 PE=1 SV=1	F	GO:0005524	ATP binding
P28288	ABCD3_HUMANATP-binding cassette sub-family D member 3 OS=Homo sapiens OX=9606 GN=ABCD3 PE=1 SV=1	F	GO:0016887	ATPase activity
P28288	ABCD3_HUMANATP-binding cassette sub-family D member 3 OS=Homo sapiens OX=9606 GN=ABCD3 PE=1 SV=1	F	GO:0042626	ATPase-coupled transmembrane transporter activity
P28288	ABCD3_HUMANATP-binding cassette sub-family D member 3 OS=Homo sapiens OX=9606 GN=ABCD3 PE=1 SV=1	F	GO:0042803	protein homodimerization activity
P28288	ABCD3_HUMANATP-binding cassette sub-family D member 3 OS=Homo sapiens OX=9606 GN=ABCD3 PE=1 SV=1	F	GO:0043621	protein self-association
P28288	ABCD3_HUMANATP-binding cassette sub-family D member 3 OS=Homo sapiens OX=9606 GN=ABCD3 PE=1 SV=1	F	GO:0140326	ATPase-coupled intramembrane lipid transporter activity
P28288	ABCD3_HUMANATP-binding cassette sub-family D member 3 OS=Homo sapiens OX=9606 GN=ABCD3 PE=1 SV=1	F	GO:1904680	peptide transmembrane transporter activity
P28288	ABCD3_HUMANATP-binding cassette sub-family D member 3 OS=Homo sapiens OX=9606 GN=ABCD3 PE=1 SV=1	P	GO:0000041	transition metal ion transport
P28288	ABCD3_HUMANATP-binding cassette sub-family D member 3 OS=Homo sapiens OX=9606 GN=ABCD3 PE=1 SV=1	P	GO:0002474	antigen processing and presentation of peptide antigen via MHC class I
P28288	ABCD3_HUMANATP-binding cassette sub-family D member 3 OS=Homo sapiens OX=9606 GN=ABCD3 PE=1 SV=1	P	GO:0006633	fatty acid biosynthetic process
P28288	ABCD3_HUMANATP-binding cassette sub-family D member 3 OS=Homo sapiens OX=9606 GN=ABCD3 PE=1 SV=1	P	GO:0007031	peroxisome organization
P28288	ABCD3_HUMANATP-binding cassette sub-family D member 3 OS=Homo sapiens OX=9606 GN=ABCD3 PE=1 SV=1	P	GO:0014070	response to organic cyclic compound
P28288	ABCD3_HUMANATP-binding cassette sub-family D member 3 OS=Homo sapiens OX=9606 GN=ABCD3 PE=1 SV=1	P	GO:0015721	bile acid and bile salt transport
P28288	ABCD3_HUMANATP-binding cassette sub-family D member 3 OS=Homo sapiens OX=9606 GN=ABCD3 PE=1 SV=1	P	GO:0015833	peptide transport
P28288	ABCD3_HUMANATP-binding cassette sub-family D member 3 OS=Homo sapiens OX=9606 GN=ABCD3 PE=1 SV=1	P	GO:0015910	long-chain fatty acid import into peroxisome
P28288	ABCD3_HUMANATP-binding cassette sub-family D member 3 OS=Homo sapiens OX=9606 GN=ABCD3 PE=1 SV=1	P	GO:0017144	drug metabolic process
P28288	ABCD3_HUMANATP-binding cassette sub-family D member 3 OS=Homo sapiens OX=9606 GN=ABCD3 PE=1 SV=1	P	GO:0032000	positive regulation of fatty acid beta-oxidation
P28288	ABCD3_HUMANATP-binding cassette sub-family D member 3 OS=Homo sapiens OX=9606 GN=ABCD3 PE=1 SV=1	P	GO:0033013	tetrapyrrole metabolic process
P28288	ABCD3_HUMANATP-binding cassette sub-family D member 3 OS=Homo sapiens OX=9606 GN=ABCD3 PE=1 SV=1	P	GO:0042493	response to drug
P28288	ABCD3_HUMANATP-binding cassette sub-family D member 3 OS=Homo sapiens OX=9606 GN=ABCD3 PE=1 SV=1	P	GO:0042760	very long-chain fatty acid catabolic process
P28288	ABCD3_HUMANATP-binding cassette sub-family D member 3 OS=Homo sapiens OX=9606 GN=ABCD3 PE=1 SV=1	P	GO:0048513	animal organ development
P28288	ABCD3_HUMANATP-binding cassette sub-family D member 3 OS=Homo sapiens OX=9606 GN=ABCD3 PE=1 SV=1	P	GO:0051186	cofactor metabolic process
P28288	ABCD3_HUMANATP-binding cassette sub-family D member 3 OS=Homo sapiens OX=9606 GN=ABCD3 PE=1 SV=1	P	GO:0061024	membrane organization
P28288	ABCD3_HUMANATP-binding cassette sub-family D member 3 OS=Homo sapiens OX=9606 GN=ABCD3 PE=1 SV=1	P	GO:0065008	regulation of biological quality
P28288	ABCD3_HUMANATP-binding cassette sub-family D member 3 OS=Homo sapiens OX=9606 GN=ABCD3 PE=1 SV=1	P	GO:0071310	cellular response to organic substance
P28288	ABCD3_HUMANATP-binding cassette sub-family D member 3 OS=Homo sapiens OX=9606 GN=ABCD3 PE=1 SV=1	P	GO:0120036	plasma membrane bounded cell projection organization
P28288	ABCD3_HUMANATP-binding cassette sub-family D member 3 OS=Homo sapiens OX=9606 GN=ABCD3 PE=1 SV=1	P	GO:1901700	response to oxygen-containing compound
O75976	CBPD_HUMANCarboxypeptidase D OS=Homo sapiens OX=9606 GN=CPD PE=1 SV=2	C	GO:0005615	extracellular space
O75976	CBPD_HUMANCarboxypeptidase D OS=Homo sapiens OX=9606 GN=CPD PE=1 SV=2	C	GO:0005794	Golgi apparatus
O75976	CBPD_HUMANCarboxypeptidase D OS=Homo sapiens OX=9606 GN=CPD PE=1 SV=2	C	GO:0005886	plasma membrane
O75976	CBPD_HUMANCarboxypeptidase D OS=Homo sapiens OX=9606 GN=CPD PE=1 SV=2	C	GO:0016021	integral component of membrane
O75976	CBPD_HUMANCarboxypeptidase D OS=Homo sapiens OX=9606 GN=CPD PE=1 SV=2	C	GO:0031410	cytoplasmic vesicle
O75976	CBPD_HUMANCarboxypeptidase D OS=Homo sapiens OX=9606 GN=CPD PE=1 SV=2	F	GO:0004181	metallocarboxypeptidase activity
O75976	CBPD_HUMANCarboxypeptidase D OS=Homo sapiens OX=9606 GN=CPD PE=1 SV=2	F	GO:0004185	serine-type carboxypeptidase activity
O75976	CBPD_HUMANCarboxypeptidase D OS=Homo sapiens OX=9606 GN=CPD PE=1 SV=2	F	GO:0008270	zinc ion binding
O75976	CBPD_HUMANCarboxypeptidase D OS=Homo sapiens OX=9606 GN=CPD PE=1 SV=2	F	GO:0042043	neurexin family protein binding
O75976	CBPD_HUMANCarboxypeptidase D OS=Homo sapiens OX=9606 GN=CPD PE=1 SV=2	F	GO:0050839	cell adhesion molecule binding
O75976	CBPD_HUMANCarboxypeptidase D OS=Homo sapiens OX=9606 GN=CPD PE=1 SV=2	P	GO:0003214	cardiac left ventricle morphogenesis
O75976	CBPD_HUMANCarboxypeptidase D OS=Homo sapiens OX=9606 GN=CPD PE=1 SV=2	P	GO:0006464	cellular protein modification process
O75976	CBPD_HUMANCarboxypeptidase D OS=Homo sapiens OX=9606 GN=CPD PE=1 SV=2	P	GO:0006518	peptide metabolic process
O75976	CBPD_HUMANCarboxypeptidase D OS=Homo sapiens OX=9606 GN=CPD PE=1 SV=2	P	GO:0016055	Wnt signaling pathway
O75976	CBPD_HUMANCarboxypeptidase D OS=Homo sapiens OX=9606 GN=CPD PE=1 SV=2	P	GO:0016485	protein processing
O75976	CBPD_HUMANCarboxypeptidase D OS=Homo sapiens OX=9606 GN=CPD PE=1 SV=2	P	GO:0030449	regulation of complement activation
O75976	CBPD_HUMANCarboxypeptidase D OS=Homo sapiens OX=9606 GN=CPD PE=1 SV=2	P	GO:0072657	protein localization to membrane
P07858	CATB_HUMANCathepsin B OS=Homo sapiens OX=9606 GN=CTSB PE=1 SV=3	C	GO:0005615	extracellular space
P07858	CATB_HUMANCathepsin B OS=Homo sapiens OX=9606 GN=CTSB PE=1 SV=3	C	GO:0005730	nucleolus
P07858	CATB_HUMANCathepsin B OS=Homo sapiens OX=9606 GN=CTSB PE=1 SV=3	C	GO:0036021	endolysosome lumen
P07858	CATB_HUMANCathepsin B OS=Homo sapiens OX=9606 GN=CTSB PE=1 SV=3	C	GO:0042470	melanosome
P07858	CATB_HUMANCathepsin B OS=Homo sapiens OX=9606 GN=CTSB PE=1 SV=3	C	GO:0048471	perinuclear region of cytoplasm
P07858	CATB_HUMANCathepsin B OS=Homo sapiens OX=9606 GN=CTSB PE=1 SV=3	C	GO:1904813	ficolin-1-rich granule lumen
P07858	CATB_HUMANCathepsin B OS=Homo sapiens OX=9606 GN=CTSB PE=1 SV=3	F	GO:0004197	cysteine-type endopeptidase activity
P07858	CATB_HUMANCathepsin B OS=Homo sapiens OX=9606 GN=CTSB PE=1 SV=3	F	GO:0005518	collagen binding
P07858	CATB_HUMANCathepsin B OS=Homo sapiens OX=9606 GN=CTSB PE=1 SV=3	F	GO:0043394	proteoglycan binding
P07858	CATB_HUMANCathepsin B OS=Homo sapiens OX=9606 GN=CTSB PE=1 SV=3	P	GO:0002224	toll-like receptor signaling pathway
P07858	CATB_HUMANCathepsin B OS=Homo sapiens OX=9606 GN=CTSB PE=1 SV=3	P	GO:0019882	antigen processing and presentation
P07858	CATB_HUMANCathepsin B OS=Homo sapiens OX=9606 GN=CTSB PE=1 SV=3	P	GO:0030574	collagen catabolic process
P07858	CATB_HUMANCathepsin B OS=Homo sapiens OX=9606 GN=CTSB PE=1 SV=3	P	GO:0030855	epithelial cell differentiation
P07858	CATB_HUMANCathepsin B OS=Homo sapiens OX=9606 GN=CTSB PE=1 SV=3	P	GO:0042981	regulation of apoptotic process
P07858	CATB_HUMANCathepsin B OS=Homo sapiens OX=9606 GN=CTSB PE=1 SV=3	P	GO:0043312	neutrophil degranulation
P07858	CATB_HUMANCathepsin B OS=Homo sapiens OX=9606 GN=CTSB PE=1 SV=3	P	GO:0046697	decidualization
P07858	CATB_HUMANCathepsin B OS=Homo sapiens OX=9606 GN=CTSB PE=1 SV=3	P	GO:0046718	viral entry into host cell
P07858	CATB_HUMANCathepsin B OS=Homo sapiens OX=9606 GN=CTSB PE=1 SV=3	P	GO:0050790	regulation of catalytic activity
P07858	CATB_HUMANCathepsin B OS=Homo sapiens OX=9606 GN=CTSB PE=1 SV=3	P	GO:0051603	proteolysis involved in cellular protein catabolic process
P07858	CATB_HUMANCathepsin B OS=Homo sapiens OX=9606 GN=CTSB PE=1 SV=3	P	GO:0065008	regulation of biological quality
P07858	CATB_HUMANCathepsin B OS=Homo sapiens OX=9606 GN=CTSB PE=1 SV=3	P	GO:0097067	cellular response to thyroid hormone stimulus
P07858	CATB_HUMANCathepsin B OS=Homo sapiens OX=9606 GN=CTSB PE=1 SV=3	P	GO:2000026	regulation of multicellular organismal development
P07858	CATB_HUMANCathepsin B OS=Homo sapiens OX=9606 GN=CTSB PE=1 SV=3	C	GO:0005581	collagen trimer
Q9Y5U9	IR3IP_HUMANImmediate early response 3-interacting 1 OS=Homo sapiens OX=9606 GN=IER3IP1 PE=1 SV=1	C	GO:0005789	endoplasmic reticulum membrane
Q9Y5U9	IR3IP_HUMANImmediate early response 3-interacting 1 OS=Homo sapiens OX=9606 GN=IER3IP1 PE=1 SV=1	C	GO:0030173	integral component of Golgi membrane
Q9Y5U9	IR3IP_HUMANImmediate early response 3-interacting 1 OS=Homo sapiens OX=9606 GN=IER3IP1 PE=1 SV=1	P	GO:0006888	endoplasmic reticulum to Golgi vesicle-mediated transport
Q9Y5U9	IR3IP_HUMANImmediate early response 3-interacting 1 OS=Homo sapiens OX=9606 GN=IER3IP1 PE=1 SV=1	P	GO:2000269	regulation of fibroblast apoptotic process
Q9Y673	ALG5_HUMANDolichyl-phosphate beta-glucosyltransferase OS=Homo sapiens OX=9606 GN=ALG5 PE=1 SV=1	F	GO:0004576	oligosaccharyl transferase activity
Q9Y673	ALG5_HUMANDolichyl-phosphate beta-glucosyltransferase OS=Homo sapiens OX=9606 GN=ALG5 PE=1 SV=1	C	GO:0008250	oligosaccharyltransferase complex
Q07954	LRP1_HUMANProlow-density lipo receptor-related 1 OS=Homo sapiens OX=9606 GN=LRP1 PE=1 SV=2	C	GO:0005615	extracellular space
Q07954	LRP1_HUMANProlow-density lipo receptor-related 1 OS=Homo sapiens OX=9606 GN=LRP1 PE=1 SV=2	C	GO:0005634	nucleus
Q07954	LRP1_HUMANProlow-density lipo receptor-related 1 OS=Homo sapiens OX=9606 GN=LRP1 PE=1 SV=2	C	GO:0005769	early endosome
Q07954	LRP1_HUMANProlow-density lipo receptor-related 1 OS=Homo sapiens OX=9606 GN=LRP1 PE=1 SV=2	C	GO:0005771	multivesicular body
Q07954	LRP1_HUMANProlow-density lipo receptor-related 1 OS=Homo sapiens OX=9606 GN=LRP1 PE=1 SV=2	C	GO:0005783	endoplasmic reticulum
Q07954	LRP1_HUMANProlow-density lipo receptor-related 1 OS=Homo sapiens OX=9606 GN=LRP1 PE=1 SV=2	C	GO:0005887	integral component of plasma membrane
Q07954	LRP1_HUMANProlow-density lipo receptor-related 1 OS=Homo sapiens OX=9606 GN=LRP1 PE=1 SV=2	C	GO:0005905	clathrin-coated pit
Q07954	LRP1_HUMANProlow-density lipo receptor-related 1 OS=Homo sapiens OX=9606 GN=LRP1 PE=1 SV=2	C	GO:0009986	cell surface
Q07954	LRP1_HUMANProlow-density lipo receptor-related 1 OS=Homo sapiens OX=9606 GN=LRP1 PE=1 SV=2	C	GO:0010008	endosome membrane
Q07954	LRP1_HUMANProlow-density lipo receptor-related 1 OS=Homo sapiens OX=9606 GN=LRP1 PE=1 SV=2	C	GO:0016323	basolateral plasma membrane
Q07954	LRP1_HUMANProlow-density lipo receptor-related 1 OS=Homo sapiens OX=9606 GN=LRP1 PE=1 SV=2	C	GO:0030136	clathrin-coated vesicle
Q07954	LRP1_HUMANProlow-density lipo receptor-related 1 OS=Homo sapiens OX=9606 GN=LRP1 PE=1 SV=2	C	GO:0030425	dendrite
Q07954	LRP1_HUMANProlow-density lipo receptor-related 1 OS=Homo sapiens OX=9606 GN=LRP1 PE=1 SV=2	C	GO:0030666	endocytic vesicle membrane
Q07954	LRP1_HUMANProlow-density lipo receptor-related 1 OS=Homo sapiens OX=9606 GN=LRP1 PE=1 SV=2	C	GO:0032593	insulin-responsive compartment
Q07954	LRP1_HUMANProlow-density lipo receptor-related 1 OS=Homo sapiens OX=9606 GN=LRP1 PE=1 SV=2	C	GO:0043025	neuronal cell body
Q07954	LRP1_HUMANProlow-density lipo receptor-related 1 OS=Homo sapiens OX=9606 GN=LRP1 PE=1 SV=2	C	GO:0043235	receptor complex
Q07954	LRP1_HUMANProlow-density lipo receptor-related 1 OS=Homo sapiens OX=9606 GN=LRP1 PE=1 SV=2	C	GO:0044295	axonal growth cone
Q07954	LRP1_HUMANProlow-density lipo receptor-related 1 OS=Homo sapiens OX=9606 GN=LRP1 PE=1 SV=2	C	GO:0044853	plasma membrane raft
Q07954	LRP1_HUMANProlow-density lipo receptor-related 1 OS=Homo sapiens OX=9606 GN=LRP1 PE=1 SV=2	C	GO:0045177	apical part of cell
Q07954	LRP1_HUMANProlow-density lipo receptor-related 1 OS=Homo sapiens OX=9606 GN=LRP1 PE=1 SV=2	C	GO:0045202	synapse
Q07954	LRP1_HUMANProlow-density lipo receptor-related 1 OS=Homo sapiens OX=9606 GN=LRP1 PE=1 SV=2	C	GO:0055037	recycling endosome
Q07954	LRP1_HUMANProlow-density lipo receptor-related 1 OS=Homo sapiens OX=9606 GN=LRP1 PE=1 SV=2	C	GO:0098791	Golgi subcompartment
Q07954	LRP1_HUMANProlow-density lipo receptor-related 1 OS=Homo sapiens OX=9606 GN=LRP1 PE=1 SV=2	C	GO:0098797	plasma membrane protein complex
Q07954	LRP1_HUMANProlow-density lipo receptor-related 1 OS=Homo sapiens OX=9606 GN=LRP1 PE=1 SV=2	F	GO:0001540	amyloid-beta binding
Q07954	LRP1_HUMANProlow-density lipo receptor-related 1 OS=Homo sapiens OX=9606 GN=LRP1 PE=1 SV=2	F	GO:0002020	protease binding
Q07954	LRP1_HUMANProlow-density lipo receptor-related 1 OS=Homo sapiens OX=9606 GN=LRP1 PE=1 SV=2	F	GO:0004888	transmembrane signaling receptor activity
Q07954	LRP1_HUMANProlow-density lipo receptor-related 1 OS=Homo sapiens OX=9606 GN=LRP1 PE=1 SV=2	F	GO:0005041	low-density lipoprotein particle receptor activity
Q07954	LRP1_HUMANProlow-density lipo receptor-related 1 OS=Homo sapiens OX=9606 GN=LRP1 PE=1 SV=2	F	GO:0005044	scavenger receptor activity
Q07954	LRP1_HUMANProlow-density lipo receptor-related 1 OS=Homo sapiens OX=9606 GN=LRP1 PE=1 SV=2	F	GO:0005215	transporter activity
Q07954	LRP1_HUMANProlow-density lipo receptor-related 1 OS=Homo sapiens OX=9606 GN=LRP1 PE=1 SV=2	F	GO:0005509	calcium ion binding
Q07954	LRP1_HUMANProlow-density lipo receptor-related 1 OS=Homo sapiens OX=9606 GN=LRP1 PE=1 SV=2	F	GO:0016964	alpha-2 macroglobulin receptor activity
Q07954	LRP1_HUMANProlow-density lipo receptor-related 1 OS=Homo sapiens OX=9606 GN=LRP1 PE=1 SV=2	F	GO:0030226	apolipoprotein receptor activity
Q07954	LRP1_HUMANProlow-density lipo receptor-related 1 OS=Homo sapiens OX=9606 GN=LRP1 PE=1 SV=2	F	GO:0032050	clathrin heavy chain binding
Q07954	LRP1_HUMANProlow-density lipo receptor-related 1 OS=Homo sapiens OX=9606 GN=LRP1 PE=1 SV=2	F	GO:0034185	apolipoprotein binding
Q07954	LRP1_HUMANProlow-density lipo receptor-related 1 OS=Homo sapiens OX=9606 GN=LRP1 PE=1 SV=2	F	GO:0042802	identical protein binding
Q07954	LRP1_HUMANProlow-density lipo receptor-related 1 OS=Homo sapiens OX=9606 GN=LRP1 PE=1 SV=2	F	GO:0043395	heparan sulfate proteoglycan binding
Q07954	LRP1_HUMANProlow-density lipo receptor-related 1 OS=Homo sapiens OX=9606 GN=LRP1 PE=1 SV=2	F	GO:0070325	lipoprotein particle receptor binding
Q07954	LRP1_HUMANProlow-density lipo receptor-related 1 OS=Homo sapiens OX=9606 GN=LRP1 PE=1 SV=2	F	GO:0071813	lipoprotein particle binding
Q07954	LRP1_HUMANProlow-density lipo receptor-related 1 OS=Homo sapiens OX=9606 GN=LRP1 PE=1 SV=2	F	GO:0071936	coreceptor activity involved in Wnt signaling pathway
Q07954	LRP1_HUMANProlow-density lipo receptor-related 1 OS=Homo sapiens OX=9606 GN=LRP1 PE=1 SV=2	P	GO:0001523	retinoid metabolic process
Q07954	LRP1_HUMANProlow-density lipo receptor-related 1 OS=Homo sapiens OX=9606 GN=LRP1 PE=1 SV=2	P	GO:0001822	kidney development
Q07954	LRP1_HUMANProlow-density lipo receptor-related 1 OS=Homo sapiens OX=9606 GN=LRP1 PE=1 SV=2	P	GO:0002009	morphogenesis of an epithelium
Q07954	LRP1_HUMANProlow-density lipo receptor-related 1 OS=Homo sapiens OX=9606 GN=LRP1 PE=1 SV=2	P	GO:0002265	astrocyte activation involved in immune response
Q07954	LRP1_HUMANProlow-density lipo receptor-related 1 OS=Homo sapiens OX=9606 GN=LRP1 PE=1 SV=2	P	GO:0003008	system process
Q07954	LRP1_HUMANProlow-density lipo receptor-related 1 OS=Homo sapiens OX=9606 GN=LRP1 PE=1 SV=2	P	GO:0006357	regulation of transcription by RNA polymerase II
Q07954	LRP1_HUMANProlow-density lipo receptor-related 1 OS=Homo sapiens OX=9606 GN=LRP1 PE=1 SV=2	P	GO:0006605	protein targeting
Q07954	LRP1_HUMANProlow-density lipo receptor-related 1 OS=Homo sapiens OX=9606 GN=LRP1 PE=1 SV=2	P	GO:0007041	lysosomal transport
Q07954	LRP1_HUMANProlow-density lipo receptor-related 1 OS=Homo sapiens OX=9606 GN=LRP1 PE=1 SV=2	P	GO:0007204	positive regulation of cytosolic calcium ion concentration
Q07954	LRP1_HUMANProlow-density lipo receptor-related 1 OS=Homo sapiens OX=9606 GN=LRP1 PE=1 SV=2	P	GO:0007205	protein kinase C-activating G protein-coupled receptor signaling pathway
Q07954	LRP1_HUMANProlow-density lipo receptor-related 1 OS=Homo sapiens OX=9606 GN=LRP1 PE=1 SV=2	P	GO:0007568	aging
Q07954	LRP1_HUMANProlow-density lipo receptor-related 1 OS=Homo sapiens OX=9606 GN=LRP1 PE=1 SV=2	P	GO:0008284	positive regulation of cell population proliferation
Q07954	LRP1_HUMANProlow-density lipo receptor-related 1 OS=Homo sapiens OX=9606 GN=LRP1 PE=1 SV=2	P	GO:0009952	anterior/posterior pattern specification
Q07954	LRP1_HUMANProlow-density lipo receptor-related 1 OS=Homo sapiens OX=9606 GN=LRP1 PE=1 SV=2	P	GO:0010715	regulation of extracellular matrix disassembly
Q07954	LRP1_HUMANProlow-density lipo receptor-related 1 OS=Homo sapiens OX=9606 GN=LRP1 PE=1 SV=2	P	GO:0010875	positive regulation of cholesterol efflux
Q07954	LRP1_HUMANProlow-density lipo receptor-related 1 OS=Homo sapiens OX=9606 GN=LRP1 PE=1 SV=2	P	GO:0010942	positive regulation of cell death
Q07954	LRP1_HUMANProlow-density lipo receptor-related 1 OS=Homo sapiens OX=9606 GN=LRP1 PE=1 SV=2	P	GO:0010951	negative regulation of endopeptidase activity
Q07954	LRP1_HUMANProlow-density lipo receptor-related 1 OS=Homo sapiens OX=9606 GN=LRP1 PE=1 SV=2	P	GO:0010977	negative regulation of neuron projection development
Q07954	LRP1_HUMANProlow-density lipo receptor-related 1 OS=Homo sapiens OX=9606 GN=LRP1 PE=1 SV=2	P	GO:0014033	neural crest cell differentiation
Q07954	LRP1_HUMANProlow-density lipo receptor-related 1 OS=Homo sapiens OX=9606 GN=LRP1 PE=1 SV=2	P	GO:0014912	negative regulation of smooth muscle cell migration
Q07954	LRP1_HUMANProlow-density lipo receptor-related 1 OS=Homo sapiens OX=9606 GN=LRP1 PE=1 SV=2	P	GO:0021987	cerebral cortex development
Q07954	LRP1_HUMANProlow-density lipo receptor-related 1 OS=Homo sapiens OX=9606 GN=LRP1 PE=1 SV=2	P	GO:0030279	negative regulation of ossification
Q07954	LRP1_HUMANProlow-density lipo receptor-related 1 OS=Homo sapiens OX=9606 GN=LRP1 PE=1 SV=2	P	GO:0030901	midbrain development
Q07954	LRP1_HUMANProlow-density lipo receptor-related 1 OS=Homo sapiens OX=9606 GN=LRP1 PE=1 SV=2	P	GO:0031623	receptor internalization
Q07954	LRP1_HUMANProlow-density lipo receptor-related 1 OS=Homo sapiens OX=9606 GN=LRP1 PE=1 SV=2	P	GO:0032092	positive regulation of protein binding
Q07954	LRP1_HUMANProlow-density lipo receptor-related 1 OS=Homo sapiens OX=9606 GN=LRP1 PE=1 SV=2	P	GO:0032388	positive regulation of intracellular transport
Q07954	LRP1_HUMANProlow-density lipo receptor-related 1 OS=Homo sapiens OX=9606 GN=LRP1 PE=1 SV=2	P	GO:0032429	regulation of phospholipase A2 activity
Q07954	LRP1_HUMANProlow-density lipo receptor-related 1 OS=Homo sapiens OX=9606 GN=LRP1 PE=1 SV=2	P	GO:0032956	regulation of actin cytoskeleton organization
Q07954	LRP1_HUMANProlow-density lipo receptor-related 1 OS=Homo sapiens OX=9606 GN=LRP1 PE=1 SV=2	P	GO:0034067	protein localization to Golgi apparatus
Q07954	LRP1_HUMANProlow-density lipo receptor-related 1 OS=Homo sapiens OX=9606 GN=LRP1 PE=1 SV=2	P	GO:0035774	positive regulation of insulin secretion involved in cellular response to glucose stimulus
Q07954	LRP1_HUMANProlow-density lipo receptor-related 1 OS=Homo sapiens OX=9606 GN=LRP1 PE=1 SV=2	P	GO:0035909	aorta morphogenesis
Q07954	LRP1_HUMANProlow-density lipo receptor-related 1 OS=Homo sapiens OX=9606 GN=LRP1 PE=1 SV=2	P	GO:0042157	lipoprotein metabolic process
Q07954	LRP1_HUMANProlow-density lipo receptor-related 1 OS=Homo sapiens OX=9606 GN=LRP1 PE=1 SV=2	P	GO:0042953	lipoprotein transport
Q07954	LRP1_HUMANProlow-density lipo receptor-related 1 OS=Homo sapiens OX=9606 GN=LRP1 PE=1 SV=2	P	GO:0043009	chordate embryonic development
Q07954	LRP1_HUMANProlow-density lipo receptor-related 1 OS=Homo sapiens OX=9606 GN=LRP1 PE=1 SV=2	P	GO:0043277	apoptotic cell clearance
Q07954	LRP1_HUMANProlow-density lipo receptor-related 1 OS=Homo sapiens OX=9606 GN=LRP1 PE=1 SV=2	P	GO:0043524	negative regulation of neuron apoptotic process
Q07954	LRP1_HUMANProlow-density lipo receptor-related 1 OS=Homo sapiens OX=9606 GN=LRP1 PE=1 SV=2	P	GO:0044242	cellular lipid catabolic process
Q07954	LRP1_HUMANProlow-density lipo receptor-related 1 OS=Homo sapiens OX=9606 GN=LRP1 PE=1 SV=2	P	GO:0044281	small molecule metabolic process
Q07954	LRP1_HUMANProlow-density lipo receptor-related 1 OS=Homo sapiens OX=9606 GN=LRP1 PE=1 SV=2	P	GO:0045667	regulation of osteoblast differentiation
Q07954	LRP1_HUMANProlow-density lipo receptor-related 1 OS=Homo sapiens OX=9606 GN=LRP1 PE=1 SV=2	P	GO:0045787	positive regulation of cell cycle
Q07954	LRP1_HUMANProlow-density lipo receptor-related 1 OS=Homo sapiens OX=9606 GN=LRP1 PE=1 SV=2	P	GO:0045807	positive regulation of endocytosis
Q07954	LRP1_HUMANProlow-density lipo receptor-related 1 OS=Homo sapiens OX=9606 GN=LRP1 PE=1 SV=2	P	GO:0045893	positive regulation of transcription, DNA-templated
Q07954	LRP1_HUMANProlow-density lipo receptor-related 1 OS=Homo sapiens OX=9606 GN=LRP1 PE=1 SV=2	P	GO:0046628	positive regulation of insulin receptor signaling pathway
Q07954	LRP1_HUMANProlow-density lipo receptor-related 1 OS=Homo sapiens OX=9606 GN=LRP1 PE=1 SV=2	P	GO:0048598	embryonic morphogenesis
Q07954	LRP1_HUMANProlow-density lipo receptor-related 1 OS=Homo sapiens OX=9606 GN=LRP1 PE=1 SV=2	P	GO:0048646	anatomical structure formation involved in morphogenesis
Q07954	LRP1_HUMANProlow-density lipo receptor-related 1 OS=Homo sapiens OX=9606 GN=LRP1 PE=1 SV=2	P	GO:0048691	positive regulation of axon extension involved in regeneration
Q07954	LRP1_HUMANProlow-density lipo receptor-related 1 OS=Homo sapiens OX=9606 GN=LRP1 PE=1 SV=2	P	GO:0048694	positive regulation of collateral sprouting of injured axon
Q07954	LRP1_HUMANProlow-density lipo receptor-related 1 OS=Homo sapiens OX=9606 GN=LRP1 PE=1 SV=2	P	GO:0050766	positive regulation of phagocytosis
Q07954	LRP1_HUMANProlow-density lipo receptor-related 1 OS=Homo sapiens OX=9606 GN=LRP1 PE=1 SV=2	P	GO:0050808	synapse organization
Q07954	LRP1_HUMANProlow-density lipo receptor-related 1 OS=Homo sapiens OX=9606 GN=LRP1 PE=1 SV=2	P	GO:0051481	negative regulation of cytosolic calcium ion concentration
Q07954	LRP1_HUMANProlow-density lipo receptor-related 1 OS=Homo sapiens OX=9606 GN=LRP1 PE=1 SV=2	P	GO:0051895	negative regulation of focal adhesion assembly
Q07954	LRP1_HUMANProlow-density lipo receptor-related 1 OS=Homo sapiens OX=9606 GN=LRP1 PE=1 SV=2	P	GO:0060042	retina morphogenesis in camera-type eye
Q07954	LRP1_HUMANProlow-density lipo receptor-related 1 OS=Homo sapiens OX=9606 GN=LRP1 PE=1 SV=2	P	GO:0060173	limb development
Q07954	LRP1_HUMANProlow-density lipo receptor-related 1 OS=Homo sapiens OX=9606 GN=LRP1 PE=1 SV=2	P	GO:0060348	bone development
Q07954	LRP1_HUMANProlow-density lipo receptor-related 1 OS=Homo sapiens OX=9606 GN=LRP1 PE=1 SV=2	P	GO:0061448	connective tissue development
Q07954	LRP1_HUMANProlow-density lipo receptor-related 1 OS=Homo sapiens OX=9606 GN=LRP1 PE=1 SV=2	P	GO:0061642	chemoattraction of axon
Q07954	LRP1_HUMANProlow-density lipo receptor-related 1 OS=Homo sapiens OX=9606 GN=LRP1 PE=1 SV=2	P	GO:0070374	positive regulation of ERK1 and ERK2 cascade
Q07954	LRP1_HUMANProlow-density lipo receptor-related 1 OS=Homo sapiens OX=9606 GN=LRP1 PE=1 SV=2	P	GO:0071542	dopaminergic neuron differentiation
Q07954	LRP1_HUMANProlow-density lipo receptor-related 1 OS=Homo sapiens OX=9606 GN=LRP1 PE=1 SV=2	P	GO:0071901	negative regulation of protein serine/threonine kinase activity
Q07954	LRP1_HUMANProlow-density lipo receptor-related 1 OS=Homo sapiens OX=9606 GN=LRP1 PE=1 SV=2	P	GO:0090090	negative regulation of canonical Wnt signaling pathway
Q07954	LRP1_HUMANProlow-density lipo receptor-related 1 OS=Homo sapiens OX=9606 GN=LRP1 PE=1 SV=2	P	GO:0150093	amyloid-beta clearance by transcytosis
Q07954	LRP1_HUMANProlow-density lipo receptor-related 1 OS=Homo sapiens OX=9606 GN=LRP1 PE=1 SV=2	P	GO:0150094	amyloid-beta clearance by cellular catabolic process
Q07954	LRP1_HUMANProlow-density lipo receptor-related 1 OS=Homo sapiens OX=9606 GN=LRP1 PE=1 SV=2	P	GO:1900149	positive regulation of Schwann cell migration
Q07954	LRP1_HUMANProlow-density lipo receptor-related 1 OS=Homo sapiens OX=9606 GN=LRP1 PE=1 SV=2	P	GO:1900223	positive regulation of amyloid-beta clearance
Q07954	LRP1_HUMANProlow-density lipo receptor-related 1 OS=Homo sapiens OX=9606 GN=LRP1 PE=1 SV=2	P	GO:1902992	negative regulation of amyloid precursor protein catabolic process
Q07954	LRP1_HUMANProlow-density lipo receptor-related 1 OS=Homo sapiens OX=9606 GN=LRP1 PE=1 SV=2	P	GO:1903078	positive regulation of protein localization to plasma membrane
Q07954	LRP1_HUMANProlow-density lipo receptor-related 1 OS=Homo sapiens OX=9606 GN=LRP1 PE=1 SV=2	P	GO:1904109	positive regulation of cholesterol import
Q07954	LRP1_HUMANProlow-density lipo receptor-related 1 OS=Homo sapiens OX=9606 GN=LRP1 PE=1 SV=2	P	GO:1904209	positive regulation of chemokine (C-C motif) ligand 2 secretion
Q07954	LRP1_HUMANProlow-density lipo receptor-related 1 OS=Homo sapiens OX=9606 GN=LRP1 PE=1 SV=2	P	GO:1904646	cellular response to amyloid-beta
Q07954	LRP1_HUMANProlow-density lipo receptor-related 1 OS=Homo sapiens OX=9606 GN=LRP1 PE=1 SV=2	P	GO:1904754	positive regulation of vascular associated smooth muscle cell migration
Q07954	LRP1_HUMANProlow-density lipo receptor-related 1 OS=Homo sapiens OX=9606 GN=LRP1 PE=1 SV=2	P	GO:1905049	negative regulation of metallopeptidase activity
Q07954	LRP1_HUMANProlow-density lipo receptor-related 1 OS=Homo sapiens OX=9606 GN=LRP1 PE=1 SV=2	P	GO:1905167	positive regulation of lysosomal protein catabolic process
Q07954	LRP1_HUMANProlow-density lipo receptor-related 1 OS=Homo sapiens OX=9606 GN=LRP1 PE=1 SV=2	P	GO:2000587	negative regulation of platelet-derived growth factor receptor-beta signaling pathway
Q6PI78	TMM65_HUMANTransmembrane 65 OS=Homo sapiens OX=9606 GN=TMEM65 PE=1 SV=2	C	GO:0005743	mitochondrial inner membrane
Q6PI78	TMM65_HUMANTransmembrane 65 OS=Homo sapiens OX=9606 GN=TMEM65 PE=1 SV=2	C	GO:0005886	plasma membrane
Q6PI78	TMM65_HUMANTransmembrane 65 OS=Homo sapiens OX=9606 GN=TMEM65 PE=1 SV=2	C	GO:0014704	intercalated disc
Q6PI78	TMM65_HUMANTransmembrane 65 OS=Homo sapiens OX=9606 GN=TMEM65 PE=1 SV=2	C	GO:0016021	integral component of membrane
Q6PI78	TMM65_HUMANTransmembrane 65 OS=Homo sapiens OX=9606 GN=TMEM65 PE=1 SV=2	P	GO:0003231	cardiac ventricle development
Q6PI78	TMM65_HUMANTransmembrane 65 OS=Homo sapiens OX=9606 GN=TMEM65 PE=1 SV=2	P	GO:1903779	regulation of cardiac conduction
P80297	MT1X_HUMANMetallothionein-1X OS=Homo sapiens OX=9606 GN=MT1X PE=1 SV=1	C	GO:0005634	nucleus
P80297	MT1X_HUMANMetallothionein-1X OS=Homo sapiens OX=9606 GN=MT1X PE=1 SV=1	C	GO:0005829	cytosol
P80297	MT1X_HUMANMetallothionein-1X OS=Homo sapiens OX=9606 GN=MT1X PE=1 SV=1	C	GO:0048471	perinuclear region of cytoplasm
P80297	MT1X_HUMANMetallothionein-1X OS=Homo sapiens OX=9606 GN=MT1X PE=1 SV=1	F	GO:0005515	protein binding
P80297	MT1X_HUMANMetallothionein-1X OS=Homo sapiens OX=9606 GN=MT1X PE=1 SV=1	F	GO:0008144	drug binding
P80297	MT1X_HUMANMetallothionein-1X OS=Homo sapiens OX=9606 GN=MT1X PE=1 SV=1	F	GO:0008270	zinc ion binding
P80297	MT1X_HUMANMetallothionein-1X OS=Homo sapiens OX=9606 GN=MT1X PE=1 SV=1	P	GO:0006878	cellular copper ion homeostasis
P80297	MT1X_HUMANMetallothionein-1X OS=Homo sapiens OX=9606 GN=MT1X PE=1 SV=1	P	GO:0006882	cellular zinc ion homeostasis
P80297	MT1X_HUMANMetallothionein-1X OS=Homo sapiens OX=9606 GN=MT1X PE=1 SV=1	P	GO:0007263	nitric oxide mediated signal transduction
P80297	MT1X_HUMANMetallothionein-1X OS=Homo sapiens OX=9606 GN=MT1X PE=1 SV=1	P	GO:0009617	response to bacterium
P80297	MT1X_HUMANMetallothionein-1X OS=Homo sapiens OX=9606 GN=MT1X PE=1 SV=1	P	GO:0010273	detoxification of copper ion
P80297	MT1X_HUMANMetallothionein-1X OS=Homo sapiens OX=9606 GN=MT1X PE=1 SV=1	P	GO:0030224	monocyte differentiation
P80297	MT1X_HUMANMetallothionein-1X OS=Homo sapiens OX=9606 GN=MT1X PE=1 SV=1	P	GO:0035690	cellular response to drug
P80297	MT1X_HUMANMetallothionein-1X OS=Homo sapiens OX=9606 GN=MT1X PE=1 SV=1	P	GO:0035924	cellular response to vascular endothelial growth factor stimulus
P80297	MT1X_HUMANMetallothionein-1X OS=Homo sapiens OX=9606 GN=MT1X PE=1 SV=1	P	GO:0036016	cellular response to interleukin-3
P80297	MT1X_HUMANMetallothionein-1X OS=Homo sapiens OX=9606 GN=MT1X PE=1 SV=1	P	GO:0036018	cellular response to erythropoietin
P80297	MT1X_HUMANMetallothionein-1X OS=Homo sapiens OX=9606 GN=MT1X PE=1 SV=1	P	GO:0042117	monocyte activation
P80297	MT1X_HUMANMetallothionein-1X OS=Homo sapiens OX=9606 GN=MT1X PE=1 SV=1	P	GO:0045926	negative regulation of growth
P80297	MT1X_HUMANMetallothionein-1X OS=Homo sapiens OX=9606 GN=MT1X PE=1 SV=1	P	GO:0060333	interferon-gamma-mediated signaling pathway
P80297	MT1X_HUMANMetallothionein-1X OS=Homo sapiens OX=9606 GN=MT1X PE=1 SV=1	P	GO:0071276	cellular response to cadmium ion
P80297	MT1X_HUMANMetallothionein-1X OS=Homo sapiens OX=9606 GN=MT1X PE=1 SV=1	P	GO:0071280	cellular response to copper ion
P80297	MT1X_HUMANMetallothionein-1X OS=Homo sapiens OX=9606 GN=MT1X PE=1 SV=1	P	GO:0071294	cellular response to zinc ion
O60711	LPXN_HUMANLeupaxin OS=Homo sapiens OX=9606 GN=LPXN PE=1 SV=1	C	GO:0002102	podosome
O60711	LPXN_HUMANLeupaxin OS=Homo sapiens OX=9606 GN=LPXN PE=1 SV=1	C	GO:0005829	cytosol
O60711	LPXN_HUMANLeupaxin OS=Homo sapiens OX=9606 GN=LPXN PE=1 SV=1	C	GO:0005911	cell-cell junction
O60711	LPXN_HUMANLeupaxin OS=Homo sapiens OX=9606 GN=LPXN PE=1 SV=1	C	GO:0005925	focal adhesion
O60711	LPXN_HUMANLeupaxin OS=Homo sapiens OX=9606 GN=LPXN PE=1 SV=1	C	GO:0099512	supramolecular fiber
O60711	LPXN_HUMANLeupaxin OS=Homo sapiens OX=9606 GN=LPXN PE=1 SV=1	C	GO:0120025	plasma membrane bounded cell projection
O60711	LPXN_HUMANLeupaxin OS=Homo sapiens OX=9606 GN=LPXN PE=1 SV=1	F	GO:0003713	transcription coactivator activity
O60711	LPXN_HUMANLeupaxin OS=Homo sapiens OX=9606 GN=LPXN PE=1 SV=1	F	GO:0008013	beta-catenin binding
O60711	LPXN_HUMANLeupaxin OS=Homo sapiens OX=9606 GN=LPXN PE=1 SV=1	F	GO:0008092	cytoskeletal protein binding
O60711	LPXN_HUMANLeupaxin OS=Homo sapiens OX=9606 GN=LPXN PE=1 SV=1	F	GO:0019903	protein phosphatase binding
O60711	LPXN_HUMANLeupaxin OS=Homo sapiens OX=9606 GN=LPXN PE=1 SV=1	P	GO:0000904	cell morphogenesis involved in differentiation
O60711	LPXN_HUMANLeupaxin OS=Homo sapiens OX=9606 GN=LPXN PE=1 SV=1	P	GO:0007155	cell adhesion
O60711	LPXN_HUMANLeupaxin OS=Homo sapiens OX=9606 GN=LPXN PE=1 SV=1	P	GO:0007172	signal complex assembly
O60711	LPXN_HUMANLeupaxin OS=Homo sapiens OX=9606 GN=LPXN PE=1 SV=1	P	GO:0008285	negative regulation of cell population proliferation
O60711	LPXN_HUMANLeupaxin OS=Homo sapiens OX=9606 GN=LPXN PE=1 SV=1	P	GO:0010718	positive regulation of epithelial to mesenchymal transition
O60711	LPXN_HUMANLeupaxin OS=Homo sapiens OX=9606 GN=LPXN PE=1 SV=1	P	GO:0022603	regulation of anatomical structure morphogenesis
O60711	LPXN_HUMANLeupaxin OS=Homo sapiens OX=9606 GN=LPXN PE=1 SV=1	P	GO:0034614	cellular response to reactive oxygen species
O60711	LPXN_HUMANLeupaxin OS=Homo sapiens OX=9606 GN=LPXN PE=1 SV=1	P	GO:0048010	vascular endothelial growth factor receptor signaling pathway
O60711	LPXN_HUMANLeupaxin OS=Homo sapiens OX=9606 GN=LPXN PE=1 SV=1	P	GO:0051496	positive regulation of stress fiber assembly
O60711	LPXN_HUMANLeupaxin OS=Homo sapiens OX=9606 GN=LPXN PE=1 SV=1	P	GO:0061061	muscle structure development
O60711	LPXN_HUMANLeupaxin OS=Homo sapiens OX=9606 GN=LPXN PE=1 SV=1	P	GO:0071560	cellular response to transforming growth factor beta stimulus
O60711	LPXN_HUMANLeupaxin OS=Homo sapiens OX=9606 GN=LPXN PE=1 SV=1	P	GO:0120036	plasma membrane bounded cell projection organization
O60711	LPXN_HUMANLeupaxin OS=Homo sapiens OX=9606 GN=LPXN PE=1 SV=1	C	GO:0005667	transcription factor complex
O60711	LPXN_HUMANLeupaxin OS=Homo sapiens OX=9606 GN=LPXN PE=1 SV=1	P	GO:0045941	positive regulation of transcription, DNA-templated
O60711	LPXN_HUMANLeupaxin OS=Homo sapiens OX=9606 GN=LPXN PE=1 SV=1	C	GO:0016342	catenin complex
Q9UI42	CBPA4_HUMANCarboxypeptidase A4 OS=Homo sapiens OX=9606 GN=CPA4 PE=1 SV=2	C	GO:0005615	extracellular space
Q9UI42	CBPA4_HUMANCarboxypeptidase A4 OS=Homo sapiens OX=9606 GN=CPA4 PE=1 SV=2	C	GO:0031410	cytoplasmic vesicle
Q9UI42	CBPA4_HUMANCarboxypeptidase A4 OS=Homo sapiens OX=9606 GN=CPA4 PE=1 SV=2	C	GO:0046658	anchored component of plasma membrane
Q9UI42	CBPA4_HUMANCarboxypeptidase A4 OS=Homo sapiens OX=9606 GN=CPA4 PE=1 SV=2	F	GO:0004181	metallocarboxypeptidase activity
Q9UI42	CBPA4_HUMANCarboxypeptidase A4 OS=Homo sapiens OX=9606 GN=CPA4 PE=1 SV=2	F	GO:0005515	protein binding
Q9UI42	CBPA4_HUMANCarboxypeptidase A4 OS=Homo sapiens OX=9606 GN=CPA4 PE=1 SV=2	F	GO:0008270	zinc ion binding
Q9UI42	CBPA4_HUMANCarboxypeptidase A4 OS=Homo sapiens OX=9606 GN=CPA4 PE=1 SV=2	P	GO:0006508	proteolysis
Q9UI42	CBPA4_HUMANCarboxypeptidase A4 OS=Homo sapiens OX=9606 GN=CPA4 PE=1 SV=2	P	GO:0007039	protein catabolic process in the vacuole
Q9UI42	CBPA4_HUMANCarboxypeptidase A4 OS=Homo sapiens OX=9606 GN=CPA4 PE=1 SV=2	P	GO:0016573	histone acetylation
Q9UI42	CBPA4_HUMANCarboxypeptidase A4 OS=Homo sapiens OX=9606 GN=CPA4 PE=1 SV=2	P	GO:0048519	negative regulation of biological process
Q9UI42	CBPA4_HUMANCarboxypeptidase A4 OS=Homo sapiens OX=9606 GN=CPA4 PE=1 SV=2	P	GO:0048583	regulation of response to stimulus
Q9UI42	CBPA4_HUMANCarboxypeptidase A4 OS=Homo sapiens OX=9606 GN=CPA4 PE=1 SV=2	P	GO:0050878	regulation of body fluid levels
Q14116	IL18_HUMANInterleukin-18 OS=Homo sapiens OX=9606 GN=IL18 PE=1 SV=1	C	GO:0005615	extracellular space
Q14116	IL18_HUMANInterleukin-18 OS=Homo sapiens OX=9606 GN=IL18 PE=1 SV=1	C	GO:0005829	cytosol
Q14116	IL18_HUMANInterleukin-18 OS=Homo sapiens OX=9606 GN=IL18 PE=1 SV=1	F	GO:0005125	cytokine activity
Q14116	IL18_HUMANInterleukin-18 OS=Homo sapiens OX=9606 GN=IL18 PE=1 SV=1	F	GO:0045515	interleukin-18 receptor binding
Q14116	IL18_HUMANInterleukin-18 OS=Homo sapiens OX=9606 GN=IL18 PE=1 SV=1	P	GO:0000165	MAPK cascade
Q14116	IL18_HUMANInterleukin-18 OS=Homo sapiens OX=9606 GN=IL18 PE=1 SV=1	P	GO:0001525	angiogenesis
Q14116	IL18_HUMANInterleukin-18 OS=Homo sapiens OX=9606 GN=IL18 PE=1 SV=1	P	GO:0007267	cell-cell signaling
Q14116	IL18_HUMANInterleukin-18 OS=Homo sapiens OX=9606 GN=IL18 PE=1 SV=1	P	GO:0010744	positive regulation of macrophage derived foam cell differentiation
Q14116	IL18_HUMANInterleukin-18 OS=Homo sapiens OX=9606 GN=IL18 PE=1 SV=1	P	GO:0014068	positive regulation of phosphatidylinositol 3-kinase signaling
Q14116	IL18_HUMANInterleukin-18 OS=Homo sapiens OX=9606 GN=IL18 PE=1 SV=1	P	GO:0030431	sleep
Q14116	IL18_HUMANInterleukin-18 OS=Homo sapiens OX=9606 GN=IL18 PE=1 SV=1	P	GO:0031663	lipopolysaccharide-mediated signaling pathway
Q14116	IL18_HUMANInterleukin-18 OS=Homo sapiens OX=9606 GN=IL18 PE=1 SV=1	P	GO:0032148	activation of protein kinase B activity
Q14116	IL18_HUMANInterleukin-18 OS=Homo sapiens OX=9606 GN=IL18 PE=1 SV=1	P	GO:0032635	interleukin-6 production
Q14116	IL18_HUMANInterleukin-18 OS=Homo sapiens OX=9606 GN=IL18 PE=1 SV=1	P	GO:0032725	positive regulation of granulocyte macrophage colony-stimulating factor production
Q14116	IL18_HUMANInterleukin-18 OS=Homo sapiens OX=9606 GN=IL18 PE=1 SV=1	P	GO:0032729	positive regulation of interferon-gamma production
Q14116	IL18_HUMANInterleukin-18 OS=Homo sapiens OX=9606 GN=IL18 PE=1 SV=1	P	GO:0032740	positive regulation of interleukin-17 production
Q14116	IL18_HUMANInterleukin-18 OS=Homo sapiens OX=9606 GN=IL18 PE=1 SV=1	P	GO:0032819	positive regulation of natural killer cell proliferation
Q14116	IL18_HUMANInterleukin-18 OS=Homo sapiens OX=9606 GN=IL18 PE=1 SV=1	P	GO:0034105	positive regulation of tissue remodeling
Q14116	IL18_HUMANInterleukin-18 OS=Homo sapiens OX=9606 GN=IL18 PE=1 SV=1	P	GO:0035655	interleukin-18-mediated signaling pathway
Q14116	IL18_HUMANInterleukin-18 OS=Homo sapiens OX=9606 GN=IL18 PE=1 SV=1	P	GO:0042033	chemokine biosynthetic process
Q14116	IL18_HUMANInterleukin-18 OS=Homo sapiens OX=9606 GN=IL18 PE=1 SV=1	P	GO:0042094	interleukin-2 biosynthetic process
Q14116	IL18_HUMANInterleukin-18 OS=Homo sapiens OX=9606 GN=IL18 PE=1 SV=1	P	GO:0042095	interferon-gamma biosynthetic process
Q14116	IL18_HUMANInterleukin-18 OS=Homo sapiens OX=9606 GN=IL18 PE=1 SV=1	P	GO:0042104	positive regulation of activated T cell proliferation
Q14116	IL18_HUMANInterleukin-18 OS=Homo sapiens OX=9606 GN=IL18 PE=1 SV=1	P	GO:0042119	neutrophil activation
Q14116	IL18_HUMANInterleukin-18 OS=Homo sapiens OX=9606 GN=IL18 PE=1 SV=1	P	GO:0042231	interleukin-13 biosynthetic process
Q14116	IL18_HUMANInterleukin-18 OS=Homo sapiens OX=9606 GN=IL18 PE=1 SV=1	P	GO:0042253	granulocyte macrophage colony-stimulating factor biosynthetic process
Q14116	IL18_HUMANInterleukin-18 OS=Homo sapiens OX=9606 GN=IL18 PE=1 SV=1	P	GO:0042267	natural killer cell mediated cytotoxicity
Q14116	IL18_HUMANInterleukin-18 OS=Homo sapiens OX=9606 GN=IL18 PE=1 SV=1	P	GO:0042531	positive regulation of tyrosine phosphorylation of STAT protein
Q14116	IL18_HUMANInterleukin-18 OS=Homo sapiens OX=9606 GN=IL18 PE=1 SV=1	P	GO:0042632	cholesterol homeostasis
Q14116	IL18_HUMANInterleukin-18 OS=Homo sapiens OX=9606 GN=IL18 PE=1 SV=1	P	GO:0045630	positive regulation of T-helper 2 cell differentiation
Q14116	IL18_HUMANInterleukin-18 OS=Homo sapiens OX=9606 GN=IL18 PE=1 SV=1	P	GO:0045662	negative regulation of myoblast differentiation
Q14116	IL18_HUMANInterleukin-18 OS=Homo sapiens OX=9606 GN=IL18 PE=1 SV=1	P	GO:0045944	positive regulation of transcription by RNA polymerase II
Q14116	IL18_HUMANInterleukin-18 OS=Homo sapiens OX=9606 GN=IL18 PE=1 SV=1	P	GO:0048661	positive regulation of smooth muscle cell proliferation
Q14116	IL18_HUMANInterleukin-18 OS=Homo sapiens OX=9606 GN=IL18 PE=1 SV=1	P	GO:0051092	positive regulation of NF-kappaB transcription factor activity
Q14116	IL18_HUMANInterleukin-18 OS=Homo sapiens OX=9606 GN=IL18 PE=1 SV=1	P	GO:0051142	positive regulation of NK T cell proliferation
Q14116	IL18_HUMANInterleukin-18 OS=Homo sapiens OX=9606 GN=IL18 PE=1 SV=1	P	GO:0051897	positive regulation of protein kinase B signaling
Q14116	IL18_HUMANInterleukin-18 OS=Homo sapiens OX=9606 GN=IL18 PE=1 SV=1	P	GO:0070328	triglyceride homeostasis
Q14116	IL18_HUMANInterleukin-18 OS=Homo sapiens OX=9606 GN=IL18 PE=1 SV=1	P	GO:0071407	cellular response to organic cyclic compound
Q14116	IL18_HUMANInterleukin-18 OS=Homo sapiens OX=9606 GN=IL18 PE=1 SV=1	P	GO:0120162	positive regulation of cold-induced thermogenesis
Q14116	IL18_HUMANInterleukin-18 OS=Homo sapiens OX=9606 GN=IL18 PE=1 SV=1	P	GO:0150078	positive regulation of neuroinflammatory response
Q14116	IL18_HUMANInterleukin-18 OS=Homo sapiens OX=9606 GN=IL18 PE=1 SV=1	P	GO:1901224	positive regulation of NIK/NF-kappaB signaling
Q14116	IL18_HUMANInterleukin-18 OS=Homo sapiens OX=9606 GN=IL18 PE=1 SV=1	P	GO:2000556	positive regulation of T-helper 1 cell cytokine production
Q14116	IL18_HUMANInterleukin-18 OS=Homo sapiens OX=9606 GN=IL18 PE=1 SV=1	C	GO:0045092	interleukin-18 receptor complex
Q6PCE3	PGM2L_HUMANGlucose 1,6-bisphosphate synthase OS=Homo sapiens OX=9606 GN=PGM2L1 PE=1 SV=3	C	GO:0005576	extracellular region
Q6PCE3	PGM2L_HUMANGlucose 1,6-bisphosphate synthase OS=Homo sapiens OX=9606 GN=PGM2L1 PE=1 SV=3	C	GO:0005829	cytosol
Q6PCE3	PGM2L_HUMANGlucose 1,6-bisphosphate synthase OS=Homo sapiens OX=9606 GN=PGM2L1 PE=1 SV=3	C	GO:0034774	secretory granule lumen
Q6PCE3	PGM2L_HUMANGlucose 1,6-bisphosphate synthase OS=Homo sapiens OX=9606 GN=PGM2L1 PE=1 SV=3	C	GO:1904813	ficolin-1-rich granule lumen
Q6PCE3	PGM2L_HUMANGlucose 1,6-bisphosphate synthase OS=Homo sapiens OX=9606 GN=PGM2L1 PE=1 SV=3	F	GO:0005515	protein binding
Q6PCE3	PGM2L_HUMANGlucose 1,6-bisphosphate synthase OS=Homo sapiens OX=9606 GN=PGM2L1 PE=1 SV=3	F	GO:0008973	phosphopentomutase activity
Q6PCE3	PGM2L_HUMANGlucose 1,6-bisphosphate synthase OS=Homo sapiens OX=9606 GN=PGM2L1 PE=1 SV=3	F	GO:0046872	metal ion binding
Q6PCE3	PGM2L_HUMANGlucose 1,6-bisphosphate synthase OS=Homo sapiens OX=9606 GN=PGM2L1 PE=1 SV=3	F	GO:0047933	glucose-1,6-bisphosphate synthase activity
Q6PCE3	PGM2L_HUMANGlucose 1,6-bisphosphate synthase OS=Homo sapiens OX=9606 GN=PGM2L1 PE=1 SV=3	P	GO:0005978	glycogen biosynthetic process
Q6PCE3	PGM2L_HUMANGlucose 1,6-bisphosphate synthase OS=Homo sapiens OX=9606 GN=PGM2L1 PE=1 SV=3	P	GO:0005980	glycogen catabolic process
Q6PCE3	PGM2L_HUMANGlucose 1,6-bisphosphate synthase OS=Homo sapiens OX=9606 GN=PGM2L1 PE=1 SV=3	P	GO:0006098	pentose-phosphate shunt
Q6PCE3	PGM2L_HUMANGlucose 1,6-bisphosphate synthase OS=Homo sapiens OX=9606 GN=PGM2L1 PE=1 SV=3	P	GO:0019388	galactose catabolic process
Q6PCE3	PGM2L_HUMANGlucose 1,6-bisphosphate synthase OS=Homo sapiens OX=9606 GN=PGM2L1 PE=1 SV=3	P	GO:0043312	neutrophil degranulation
Q6PCE3	PGM2L_HUMANGlucose 1,6-bisphosphate synthase OS=Homo sapiens OX=9606 GN=PGM2L1 PE=1 SV=3	P	GO:0061621	canonical glycolysis
Q6PCE3	PGM2L_HUMANGlucose 1,6-bisphosphate synthase OS=Homo sapiens OX=9606 GN=PGM2L1 PE=1 SV=3	P	GO:0006144	purine nucleobase metabolic process
Q6PCE3	PGM2L_HUMANGlucose 1,6-bisphosphate synthase OS=Homo sapiens OX=9606 GN=PGM2L1 PE=1 SV=3	P	GO:0005982	starch metabolic process
Q6PCE3	PGM2L_HUMANGlucose 1,6-bisphosphate synthase OS=Homo sapiens OX=9606 GN=PGM2L1 PE=1 SV=3	P	GO:0005985	sucrose metabolic process
Q6UXH1	CREL2_HUMAN disulfide isomerase CRELD2 OS=Homo sapiens OX=9606 GN=CRELD2 PE=1 SV=1	C	GO:0005615	extracellular space
Q6UXH1	CREL2_HUMAN disulfide isomerase CRELD2 OS=Homo sapiens OX=9606 GN=CRELD2 PE=1 SV=1	C	GO:0005783	endoplasmic reticulum
Q6UXH1	CREL2_HUMAN disulfide isomerase CRELD2 OS=Homo sapiens OX=9606 GN=CRELD2 PE=1 SV=1	C	GO:0005794	Golgi apparatus
Q6UXH1	CREL2_HUMAN disulfide isomerase CRELD2 OS=Homo sapiens OX=9606 GN=CRELD2 PE=1 SV=1	C	GO:0044425	membrane part
Q6UXH1	CREL2_HUMAN disulfide isomerase CRELD2 OS=Homo sapiens OX=9606 GN=CRELD2 PE=1 SV=1	F	GO:0003756	protein disulfide isomerase activity
Q6UXH1	CREL2_HUMAN disulfide isomerase CRELD2 OS=Homo sapiens OX=9606 GN=CRELD2 PE=1 SV=1	F	GO:0005509	calcium ion binding
Q6UXH1	CREL2_HUMAN disulfide isomerase CRELD2 OS=Homo sapiens OX=9606 GN=CRELD2 PE=1 SV=1	F	GO:0005515	protein binding
Q6UXH1	CREL2_HUMAN disulfide isomerase CRELD2 OS=Homo sapiens OX=9606 GN=CRELD2 PE=1 SV=1	P	GO:0003197	endocardial cushion development
Q6UXH1	CREL2_HUMAN disulfide isomerase CRELD2 OS=Homo sapiens OX=9606 GN=CRELD2 PE=1 SV=1	P	GO:0003279	cardiac septum development
Q6UXH1	CREL2_HUMAN disulfide isomerase CRELD2 OS=Homo sapiens OX=9606 GN=CRELD2 PE=1 SV=1	P	GO:0048523	negative regulation of cellular process
Q6UXH1	CREL2_HUMAN disulfide isomerase CRELD2 OS=Homo sapiens OX=9606 GN=CRELD2 PE=1 SV=1	P	GO:0051716	cellular response to stimulus
P09382	LEG1_HUMANGalectin-1 OS=Homo sapiens OX=9606 GN=LGALS1 PE=1 SV=2	C	GO:0005634	nucleus
P09382	LEG1_HUMANGalectin-1 OS=Homo sapiens OX=9606 GN=LGALS1 PE=1 SV=2	C	GO:0005829	cytosol
P09382	LEG1_HUMANGalectin-1 OS=Homo sapiens OX=9606 GN=LGALS1 PE=1 SV=2	C	GO:0009986	cell surface
P09382	LEG1_HUMANGalectin-1 OS=Homo sapiens OX=9606 GN=LGALS1 PE=1 SV=2	C	GO:0062023	collagen-containing extracellular matrix
P09382	LEG1_HUMANGalectin-1 OS=Homo sapiens OX=9606 GN=LGALS1 PE=1 SV=2	F	GO:0030395	lactose binding
P09382	LEG1_HUMANGalectin-1 OS=Homo sapiens OX=9606 GN=LGALS1 PE=1 SV=2	F	GO:0042803	protein homodimerization activity
P09382	LEG1_HUMANGalectin-1 OS=Homo sapiens OX=9606 GN=LGALS1 PE=1 SV=2	F	GO:0043236	laminin binding
P09382	LEG1_HUMANGalectin-1 OS=Homo sapiens OX=9606 GN=LGALS1 PE=1 SV=2	P	GO:0002317	plasma cell differentiation
P09382	LEG1_HUMANGalectin-1 OS=Homo sapiens OX=9606 GN=LGALS1 PE=1 SV=2	P	GO:0006915	apoptotic process
P09382	LEG1_HUMANGalectin-1 OS=Homo sapiens OX=9606 GN=LGALS1 PE=1 SV=2	P	GO:0010468	regulation of gene expression
P09382	LEG1_HUMANGalectin-1 OS=Homo sapiens OX=9606 GN=LGALS1 PE=1 SV=2	P	GO:0010812	negative regulation of cell-substrate adhesion
P09382	LEG1_HUMANGalectin-1 OS=Homo sapiens OX=9606 GN=LGALS1 PE=1 SV=2	P	GO:0010977	negative regulation of neuron projection development
P09382	LEG1_HUMANGalectin-1 OS=Homo sapiens OX=9606 GN=LGALS1 PE=1 SV=2	P	GO:0031295	T cell costimulation
P09382	LEG1_HUMANGalectin-1 OS=Homo sapiens OX=9606 GN=LGALS1 PE=1 SV=2	P	GO:0035900	response to isolation stress
P09382	LEG1_HUMANGalectin-1 OS=Homo sapiens OX=9606 GN=LGALS1 PE=1 SV=2	P	GO:0043687	post-translational protein modification
P09382	LEG1_HUMANGalectin-1 OS=Homo sapiens OX=9606 GN=LGALS1 PE=1 SV=2	P	GO:0050715	positive regulation of cytokine secretion
P09382	LEG1_HUMANGalectin-1 OS=Homo sapiens OX=9606 GN=LGALS1 PE=1 SV=2	P	GO:0071407	cellular response to organic cyclic compound
P09382	LEG1_HUMANGalectin-1 OS=Homo sapiens OX=9606 GN=LGALS1 PE=1 SV=2	P	GO:2001200	positive regulation of dendritic cell differentiation
O15321	TM9S1_HUMANTransmembrane 9 superfamily member 1 OS=Homo sapiens OX=9606 GN=TM9SF1 PE=2 SV=2	C	GO:0000421	autophagosome membrane
O15321	TM9S1_HUMANTransmembrane 9 superfamily member 1 OS=Homo sapiens OX=9606 GN=TM9SF1 PE=2 SV=2	C	GO:0005765	lysosomal membrane
O15321	TM9S1_HUMANTransmembrane 9 superfamily member 1 OS=Homo sapiens OX=9606 GN=TM9SF1 PE=2 SV=2	C	GO:0005768	endosome
O15321	TM9S1_HUMANTransmembrane 9 superfamily member 1 OS=Homo sapiens OX=9606 GN=TM9SF1 PE=2 SV=2	C	GO:0016021	integral component of membrane
O15321	TM9S1_HUMANTransmembrane 9 superfamily member 1 OS=Homo sapiens OX=9606 GN=TM9SF1 PE=2 SV=2	P	GO:0006914	autophagy
O15321	TM9S1_HUMANTransmembrane 9 superfamily member 1 OS=Homo sapiens OX=9606 GN=TM9SF1 PE=2 SV=2	P	GO:0065007	biological regulation
O15321	TM9S1_HUMANTransmembrane 9 superfamily member 1 OS=Homo sapiens OX=9606 GN=TM9SF1 PE=2 SV=2	P	GO:0072657	protein localization to membrane
P17301	ITA2_HUMANIntegrin alpha-2 OS=Homo sapiens OX=9606 GN=ITGA2 PE=1 SV=1	C	GO:0005634	nucleus
P17301	ITA2_HUMANIntegrin alpha-2 OS=Homo sapiens OX=9606 GN=ITGA2 PE=1 SV=1	C	GO:0009986	cell surface
P17301	ITA2_HUMANIntegrin alpha-2 OS=Homo sapiens OX=9606 GN=ITGA2 PE=1 SV=1	C	GO:0034666	integrin alpha2-beta1 complex
P17301	ITA2_HUMANIntegrin alpha-2 OS=Homo sapiens OX=9606 GN=ITGA2 PE=1 SV=1	C	GO:0043679	axon terminus
P17301	ITA2_HUMANIntegrin alpha-2 OS=Homo sapiens OX=9606 GN=ITGA2 PE=1 SV=1	C	GO:0048471	perinuclear region of cytoplasm
P17301	ITA2_HUMANIntegrin alpha-2 OS=Homo sapiens OX=9606 GN=ITGA2 PE=1 SV=1	F	GO:0001540	amyloid-beta binding
P17301	ITA2_HUMANIntegrin alpha-2 OS=Homo sapiens OX=9606 GN=ITGA2 PE=1 SV=1	F	GO:0001618	virus receptor activity
P17301	ITA2_HUMANIntegrin alpha-2 OS=Homo sapiens OX=9606 GN=ITGA2 PE=1 SV=1	F	GO:0005178	integrin binding
P17301	ITA2_HUMANIntegrin alpha-2 OS=Homo sapiens OX=9606 GN=ITGA2 PE=1 SV=1	F	GO:0043395	heparan sulfate proteoglycan binding
P17301	ITA2_HUMANIntegrin alpha-2 OS=Homo sapiens OX=9606 GN=ITGA2 PE=1 SV=1	F	GO:0098639	collagen binding involved in cell-matrix adhesion
P17301	ITA2_HUMANIntegrin alpha-2 OS=Homo sapiens OX=9606 GN=ITGA2 PE=1 SV=1	P	GO:0002376	immune system process
P17301	ITA2_HUMANIntegrin alpha-2 OS=Homo sapiens OX=9606 GN=ITGA2 PE=1 SV=1	P	GO:0007229	integrin-mediated signaling pathway
P17301	ITA2_HUMANIntegrin alpha-2 OS=Homo sapiens OX=9606 GN=ITGA2 PE=1 SV=1	P	GO:0014075	response to amine
P17301	ITA2_HUMANIntegrin alpha-2 OS=Homo sapiens OX=9606 GN=ITGA2 PE=1 SV=1	P	GO:0030198	extracellular matrix organization
P17301	ITA2_HUMANIntegrin alpha-2 OS=Homo sapiens OX=9606 GN=ITGA2 PE=1 SV=1	P	GO:0032516	positive regulation of phosphoprotein phosphatase activity
P17301	ITA2_HUMANIntegrin alpha-2 OS=Homo sapiens OX=9606 GN=ITGA2 PE=1 SV=1	P	GO:0033343	positive regulation of collagen binding
P17301	ITA2_HUMANIntegrin alpha-2 OS=Homo sapiens OX=9606 GN=ITGA2 PE=1 SV=1	P	GO:0033591	response to L-ascorbic acid
P17301	ITA2_HUMANIntegrin alpha-2 OS=Homo sapiens OX=9606 GN=ITGA2 PE=1 SV=1	P	GO:0033627	cell adhesion mediated by integrin
P17301	ITA2_HUMANIntegrin alpha-2 OS=Homo sapiens OX=9606 GN=ITGA2 PE=1 SV=1	P	GO:0038065	collagen-activated signaling pathway
P17301	ITA2_HUMANIntegrin alpha-2 OS=Homo sapiens OX=9606 GN=ITGA2 PE=1 SV=1	P	GO:0043388	positive regulation of DNA binding
P17301	ITA2_HUMANIntegrin alpha-2 OS=Homo sapiens OX=9606 GN=ITGA2 PE=1 SV=1	P	GO:0045785	positive regulation of cell adhesion
P17301	ITA2_HUMANIntegrin alpha-2 OS=Homo sapiens OX=9606 GN=ITGA2 PE=1 SV=1	P	GO:0045987	positive regulation of smooth muscle contraction
P17301	ITA2_HUMANIntegrin alpha-2 OS=Homo sapiens OX=9606 GN=ITGA2 PE=1 SV=1	P	GO:0046718	viral entry into host cell
P17301	ITA2_HUMANIntegrin alpha-2 OS=Homo sapiens OX=9606 GN=ITGA2 PE=1 SV=1	P	GO:0048041	focal adhesion assembly
P17301	ITA2_HUMANIntegrin alpha-2 OS=Homo sapiens OX=9606 GN=ITGA2 PE=1 SV=1	P	GO:0048333	mesodermal cell differentiation
P17301	ITA2_HUMANIntegrin alpha-2 OS=Homo sapiens OX=9606 GN=ITGA2 PE=1 SV=1	P	GO:0050729	positive regulation of inflammatory response
P17301	ITA2_HUMANIntegrin alpha-2 OS=Homo sapiens OX=9606 GN=ITGA2 PE=1 SV=1	P	GO:0050927	positive regulation of positive chemotaxis
P17301	ITA2_HUMANIntegrin alpha-2 OS=Homo sapiens OX=9606 GN=ITGA2 PE=1 SV=1	P	GO:0051179	localization
P17301	ITA2_HUMANIntegrin alpha-2 OS=Homo sapiens OX=9606 GN=ITGA2 PE=1 SV=1	P	GO:0051971	positive regulation of transmission of nerve impulse
P17301	ITA2_HUMANIntegrin alpha-2 OS=Homo sapiens OX=9606 GN=ITGA2 PE=1 SV=1	P	GO:0071407	cellular response to organic cyclic compound
P17301	ITA2_HUMANIntegrin alpha-2 OS=Homo sapiens OX=9606 GN=ITGA2 PE=1 SV=1	P	GO:0098609	cell-cell adhesion
O95810	CAVN2_HUMANCaveolae-associated 2 OS=Homo sapiens OX=9606 GN=CAVIN2 PE=1 SV=3	C	GO:0005654	nucleoplasm
O95810	CAVN2_HUMANCaveolae-associated 2 OS=Homo sapiens OX=9606 GN=CAVIN2 PE=1 SV=3	C	GO:0005739	mitochondrion
O95810	CAVN2_HUMANCaveolae-associated 2 OS=Homo sapiens OX=9606 GN=CAVIN2 PE=1 SV=3	C	GO:0005829	cytosol
O95810	CAVN2_HUMANCaveolae-associated 2 OS=Homo sapiens OX=9606 GN=CAVIN2 PE=1 SV=3	C	GO:0005901	caveola
O95810	CAVN2_HUMANCaveolae-associated 2 OS=Homo sapiens OX=9606 GN=CAVIN2 PE=1 SV=3	C	GO:0015629	actin cytoskeleton
O95810	CAVN2_HUMANCaveolae-associated 2 OS=Homo sapiens OX=9606 GN=CAVIN2 PE=1 SV=3	C	GO:0032991	protein-containing complex
O95810	CAVN2_HUMANCaveolae-associated 2 OS=Homo sapiens OX=9606 GN=CAVIN2 PE=1 SV=3	F	GO:0001786	phosphatidylserine binding
O95810	CAVN2_HUMANCaveolae-associated 2 OS=Homo sapiens OX=9606 GN=CAVIN2 PE=1 SV=3	F	GO:0005080	protein kinase C binding
O95810	CAVN2_HUMANCaveolae-associated 2 OS=Homo sapiens OX=9606 GN=CAVIN2 PE=1 SV=3	F	GO:0042134	rRNA primary transcript binding
O95810	CAVN2_HUMANCaveolae-associated 2 OS=Homo sapiens OX=9606 GN=CAVIN2 PE=1 SV=3	F	GO:0042802	identical protein binding
O95810	CAVN2_HUMANCaveolae-associated 2 OS=Homo sapiens OX=9606 GN=CAVIN2 PE=1 SV=3	P	GO:0006361	transcription initiation from RNA polymerase I promoter
O95810	CAVN2_HUMANCaveolae-associated 2 OS=Homo sapiens OX=9606 GN=CAVIN2 PE=1 SV=3	P	GO:0006363	termination of RNA polymerase I transcription
O95810	CAVN2_HUMANCaveolae-associated 2 OS=Homo sapiens OX=9606 GN=CAVIN2 PE=1 SV=3	P	GO:0010468	regulation of gene expression
O95810	CAVN2_HUMANCaveolae-associated 2 OS=Homo sapiens OX=9606 GN=CAVIN2 PE=1 SV=3	P	GO:0031323	regulation of cellular metabolic process
O95810	CAVN2_HUMANCaveolae-associated 2 OS=Homo sapiens OX=9606 GN=CAVIN2 PE=1 SV=3	P	GO:0032501	multicellular organismal process
O95810	CAVN2_HUMANCaveolae-associated 2 OS=Homo sapiens OX=9606 GN=CAVIN2 PE=1 SV=3	P	GO:0032502	developmental process
O95810	CAVN2_HUMANCaveolae-associated 2 OS=Homo sapiens OX=9606 GN=CAVIN2 PE=1 SV=3	P	GO:0048522	positive regulation of cellular process
O95810	CAVN2_HUMANCaveolae-associated 2 OS=Homo sapiens OX=9606 GN=CAVIN2 PE=1 SV=3	P	GO:0097320	plasma membrane tubulation
O95810	CAVN2_HUMANCaveolae-associated 2 OS=Homo sapiens OX=9606 GN=CAVIN2 PE=1 SV=3	P	GO:1902531	regulation of intracellular signal transduction
Q5SZL2	CE85L_HUMANCentrosomal of 85 kDa-like OS=Homo sapiens OX=9606 GN=CEP85L PE=1 SV=1	C	GO:0005634	nucleus
Q5SZL2	CE85L_HUMANCentrosomal of 85 kDa-like OS=Homo sapiens OX=9606 GN=CEP85L PE=1 SV=1	C	GO:0005813	centrosome
Q5SZL2	CE85L_HUMANCentrosomal of 85 kDa-like OS=Homo sapiens OX=9606 GN=CEP85L PE=1 SV=1	C	GO:0044444	cytoplasmic part
Q5SZL2	CE85L_HUMANCentrosomal of 85 kDa-like OS=Homo sapiens OX=9606 GN=CEP85L PE=1 SV=1	P	GO:0050794	regulation of cellular process
P48060	GLIP1_HUMANGlioma pathogenesis-related 1 OS=Homo sapiens OX=9606 GN=GLIPR1 PE=1 SV=3	C	GO:0005615	extracellular space
P48060	GLIP1_HUMANGlioma pathogenesis-related 1 OS=Homo sapiens OX=9606 GN=GLIPR1 PE=1 SV=3	C	GO:0005886	plasma membrane
P48060	GLIP1_HUMANGlioma pathogenesis-related 1 OS=Homo sapiens OX=9606 GN=GLIPR1 PE=1 SV=3	C	GO:0016021	integral component of membrane
P48060	GLIP1_HUMANGlioma pathogenesis-related 1 OS=Homo sapiens OX=9606 GN=GLIPR1 PE=1 SV=3	C	GO:0035577	azurophil granule membrane
P48060	GLIP1_HUMANGlioma pathogenesis-related 1 OS=Homo sapiens OX=9606 GN=GLIPR1 PE=1 SV=3	C	GO:0042581	specific granule
P48060	GLIP1_HUMANGlioma pathogenesis-related 1 OS=Homo sapiens OX=9606 GN=GLIPR1 PE=1 SV=3	C	GO:0070013	intracellular organelle lumen
P48060	GLIP1_HUMANGlioma pathogenesis-related 1 OS=Homo sapiens OX=9606 GN=GLIPR1 PE=1 SV=3	P	GO:0007338	single fertilization
P48060	GLIP1_HUMANGlioma pathogenesis-related 1 OS=Homo sapiens OX=9606 GN=GLIPR1 PE=1 SV=3	P	GO:0019216	regulation of lipid metabolic process
P48060	GLIP1_HUMANGlioma pathogenesis-related 1 OS=Homo sapiens OX=9606 GN=GLIPR1 PE=1 SV=3	P	GO:0043312	neutrophil degranulation
P48060	GLIP1_HUMANGlioma pathogenesis-related 1 OS=Homo sapiens OX=9606 GN=GLIPR1 PE=1 SV=3	P	GO:0048856	anatomical structure development
P63313	TYB10_HUMANThymosin beta-10 OS=Homo sapiens OX=9606 GN=TMSB10 PE=1 SV=2	C	GO:0005576	extracellular region
P63313	TYB10_HUMANThymosin beta-10 OS=Homo sapiens OX=9606 GN=TMSB10 PE=1 SV=2	C	GO:0005634	nucleus
P63313	TYB10_HUMANThymosin beta-10 OS=Homo sapiens OX=9606 GN=TMSB10 PE=1 SV=2	C	GO:0005829	cytosol
P63313	TYB10_HUMANThymosin beta-10 OS=Homo sapiens OX=9606 GN=TMSB10 PE=1 SV=2	C	GO:0005856	cytoskeleton
P63313	TYB10_HUMANThymosin beta-10 OS=Homo sapiens OX=9606 GN=TMSB10 PE=1 SV=2	C	GO:0031093	platelet alpha granule lumen
P63313	TYB10_HUMANThymosin beta-10 OS=Homo sapiens OX=9606 GN=TMSB10 PE=1 SV=2	F	GO:0003785	actin monomer binding
P63313	TYB10_HUMANThymosin beta-10 OS=Homo sapiens OX=9606 GN=TMSB10 PE=1 SV=2	F	GO:0019899	enzyme binding
P63313	TYB10_HUMANThymosin beta-10 OS=Homo sapiens OX=9606 GN=TMSB10 PE=1 SV=2	P	GO:0002576	platelet degranulation
P63313	TYB10_HUMANThymosin beta-10 OS=Homo sapiens OX=9606 GN=TMSB10 PE=1 SV=2	P	GO:0007253	cytoplasmic sequestering of NF-kappaB
P63313	TYB10_HUMANThymosin beta-10 OS=Homo sapiens OX=9606 GN=TMSB10 PE=1 SV=2	P	GO:0033209	tumor necrosis factor-mediated signaling pathway
P63313	TYB10_HUMANThymosin beta-10 OS=Homo sapiens OX=9606 GN=TMSB10 PE=1 SV=2	P	GO:0042989	sequestering of actin monomers
P63313	TYB10_HUMANThymosin beta-10 OS=Homo sapiens OX=9606 GN=TMSB10 PE=1 SV=2	P	GO:0043536	positive regulation of blood vessel endothelial cell migration
P63313	TYB10_HUMANThymosin beta-10 OS=Homo sapiens OX=9606 GN=TMSB10 PE=1 SV=2	P	GO:0050727	regulation of inflammatory response
P63313	TYB10_HUMANThymosin beta-10 OS=Homo sapiens OX=9606 GN=TMSB10 PE=1 SV=2	P	GO:1901223	negative regulation of NIK/NF-kappaB signaling
P63313	TYB10_HUMANThymosin beta-10 OS=Homo sapiens OX=9606 GN=TMSB10 PE=1 SV=2	P	GO:1903026	negative regulation of RNA polymerase II regulatory region sequence-specific DNA binding
P63313	TYB10_HUMANThymosin beta-10 OS=Homo sapiens OX=9606 GN=TMSB10 PE=1 SV=2	P	GO:1905273	positive regulation of proton-transporting ATP synthase activity, rotational mechanism
P63313	TYB10_HUMANThymosin beta-10 OS=Homo sapiens OX=9606 GN=TMSB10 PE=1 SV=2	P	GO:2000483	negative regulation of interleukin-8 secretion
P63313	TYB10_HUMANThymosin beta-10 OS=Homo sapiens OX=9606 GN=TMSB10 PE=1 SV=2	P	GO:2001028	positive regulation of endothelial cell chemotaxis
Q9UKV8	AGO2_HUMAN argonaute-2 OS=Homo sapiens OX=9606 GN=AGO2 PE=1 SV=3	C	GO:0000794	condensed nuclear chromosome
Q9UKV8	AGO2_HUMAN argonaute-2 OS=Homo sapiens OX=9606 GN=AGO2 PE=1 SV=3	C	GO:0000932	P-body
Q9UKV8	AGO2_HUMAN argonaute-2 OS=Homo sapiens OX=9606 GN=AGO2 PE=1 SV=3	C	GO:0005654	nucleoplasm
Q9UKV8	AGO2_HUMAN argonaute-2 OS=Homo sapiens OX=9606 GN=AGO2 PE=1 SV=3	C	GO:0005829	cytosol
Q9UKV8	AGO2_HUMAN argonaute-2 OS=Homo sapiens OX=9606 GN=AGO2 PE=1 SV=3	C	GO:0005844	polysome
Q9UKV8	AGO2_HUMAN argonaute-2 OS=Homo sapiens OX=9606 GN=AGO2 PE=1 SV=3	C	GO:0005845	mRNA cap binding complex
Q9UKV8	AGO2_HUMAN argonaute-2 OS=Homo sapiens OX=9606 GN=AGO2 PE=1 SV=3	C	GO:0016442	RISC complex
Q9UKV8	AGO2_HUMAN argonaute-2 OS=Homo sapiens OX=9606 GN=AGO2 PE=1 SV=3	C	GO:0030054	cell junction
Q9UKV8	AGO2_HUMAN argonaute-2 OS=Homo sapiens OX=9606 GN=AGO2 PE=1 SV=3	C	GO:0030425	dendrite
Q9UKV8	AGO2_HUMAN argonaute-2 OS=Homo sapiens OX=9606 GN=AGO2 PE=1 SV=3	C	GO:0070062	extracellular exosome
Q9UKV8	AGO2_HUMAN argonaute-2 OS=Homo sapiens OX=9606 GN=AGO2 PE=1 SV=3	C	GO:0070578	RISC-loading complex
Q9UKV8	AGO2_HUMAN argonaute-2 OS=Homo sapiens OX=9606 GN=AGO2 PE=1 SV=3	F	GO:0000340	RNA 7-methylguanosine cap binding
Q9UKV8	AGO2_HUMAN argonaute-2 OS=Homo sapiens OX=9606 GN=AGO2 PE=1 SV=3	F	GO:0000978	RNA polymerase II proximal promoter sequence-specific DNA binding
Q9UKV8	AGO2_HUMAN argonaute-2 OS=Homo sapiens OX=9606 GN=AGO2 PE=1 SV=3	F	GO:0000993	RNA polymerase II complex binding
Q9UKV8	AGO2_HUMAN argonaute-2 OS=Homo sapiens OX=9606 GN=AGO2 PE=1 SV=3	F	GO:0001047	core promoter binding
Q9UKV8	AGO2_HUMAN argonaute-2 OS=Homo sapiens OX=9606 GN=AGO2 PE=1 SV=3	F	GO:0003725	double-stranded RNA binding
Q9UKV8	AGO2_HUMAN argonaute-2 OS=Homo sapiens OX=9606 GN=AGO2 PE=1 SV=3	F	GO:0003727	single-stranded RNA binding
Q9UKV8	AGO2_HUMAN argonaute-2 OS=Homo sapiens OX=9606 GN=AGO2 PE=1 SV=3	F	GO:0003743	translation initiation factor activity
Q9UKV8	AGO2_HUMAN argonaute-2 OS=Homo sapiens OX=9606 GN=AGO2 PE=1 SV=3	F	GO:0008022	protein C-terminus binding
Q9UKV8	AGO2_HUMAN argonaute-2 OS=Homo sapiens OX=9606 GN=AGO2 PE=1 SV=3	F	GO:0035197	siRNA binding
Q9UKV8	AGO2_HUMAN argonaute-2 OS=Homo sapiens OX=9606 GN=AGO2 PE=1 SV=3	F	GO:0035198	miRNA binding
Q9UKV8	AGO2_HUMAN argonaute-2 OS=Homo sapiens OX=9606 GN=AGO2 PE=1 SV=3	F	GO:0046872	metal ion binding
Q9UKV8	AGO2_HUMAN argonaute-2 OS=Homo sapiens OX=9606 GN=AGO2 PE=1 SV=3	F	GO:0070551	endoribonuclease activity, cleaving siRNA-paired mRNA
Q9UKV8	AGO2_HUMAN argonaute-2 OS=Homo sapiens OX=9606 GN=AGO2 PE=1 SV=3	F	GO:0090624	endoribonuclease activity, cleaving miRNA-paired mRNA
Q9UKV8	AGO2_HUMAN argonaute-2 OS=Homo sapiens OX=9606 GN=AGO2 PE=1 SV=3	F	GO:0098808	mRNA cap binding
Q9UKV8	AGO2_HUMAN argonaute-2 OS=Homo sapiens OX=9606 GN=AGO2 PE=1 SV=3	P	GO:0007130	synaptonemal complex assembly
Q9UKV8	AGO2_HUMAN argonaute-2 OS=Homo sapiens OX=9606 GN=AGO2 PE=1 SV=3	P	GO:0007140	male meiotic nuclear division
Q9UKV8	AGO2_HUMAN argonaute-2 OS=Homo sapiens OX=9606 GN=AGO2 PE=1 SV=3	P	GO:0007223	Wnt signaling pathway, calcium modulating pathway
Q9UKV8	AGO2_HUMAN argonaute-2 OS=Homo sapiens OX=9606 GN=AGO2 PE=1 SV=3	P	GO:0009791	post-embryonic development
Q9UKV8	AGO2_HUMAN argonaute-2 OS=Homo sapiens OX=9606 GN=AGO2 PE=1 SV=3	P	GO:0010501	RNA secondary structure unwinding
Q9UKV8	AGO2_HUMAN argonaute-2 OS=Homo sapiens OX=9606 GN=AGO2 PE=1 SV=3	P	GO:0010586	miRNA metabolic process
Q9UKV8	AGO2_HUMAN argonaute-2 OS=Homo sapiens OX=9606 GN=AGO2 PE=1 SV=3	P	GO:0016525	negative regulation of angiogenesis
Q9UKV8	AGO2_HUMAN argonaute-2 OS=Homo sapiens OX=9606 GN=AGO2 PE=1 SV=3	P	GO:0022604	regulation of cell morphogenesis
Q9UKV8	AGO2_HUMAN argonaute-2 OS=Homo sapiens OX=9606 GN=AGO2 PE=1 SV=3	P	GO:0030422	production of siRNA involved in RNA interference
Q9UKV8	AGO2_HUMAN argonaute-2 OS=Homo sapiens OX=9606 GN=AGO2 PE=1 SV=3	P	GO:0031054	pre-miRNA processing
Q9UKV8	AGO2_HUMAN argonaute-2 OS=Homo sapiens OX=9606 GN=AGO2 PE=1 SV=3	P	GO:0035087	siRNA loading onto RISC involved in RNA interference
Q9UKV8	AGO2_HUMAN argonaute-2 OS=Homo sapiens OX=9606 GN=AGO2 PE=1 SV=3	P	GO:0035279	mRNA cleavage involved in gene silencing by miRNA
Q9UKV8	AGO2_HUMAN argonaute-2 OS=Homo sapiens OX=9606 GN=AGO2 PE=1 SV=3	P	GO:0035280	miRNA loading onto RISC involved in gene silencing by miRNA
Q9UKV8	AGO2_HUMAN argonaute-2 OS=Homo sapiens OX=9606 GN=AGO2 PE=1 SV=3	P	GO:0042985	negative regulation of amyloid precursor protein biosynthetic process
Q9UKV8	AGO2_HUMAN argonaute-2 OS=Homo sapiens OX=9606 GN=AGO2 PE=1 SV=3	P	GO:0043066	negative regulation of apoptotic process
Q9UKV8	AGO2_HUMAN argonaute-2 OS=Homo sapiens OX=9606 GN=AGO2 PE=1 SV=3	P	GO:0045652	regulation of megakaryocyte differentiation
Q9UKV8	AGO2_HUMAN argonaute-2 OS=Homo sapiens OX=9606 GN=AGO2 PE=1 SV=3	P	GO:0045766	positive regulation of angiogenesis
Q9UKV8	AGO2_HUMAN argonaute-2 OS=Homo sapiens OX=9606 GN=AGO2 PE=1 SV=3	P	GO:0045944	positive regulation of transcription by RNA polymerase II
Q9UKV8	AGO2_HUMAN argonaute-2 OS=Homo sapiens OX=9606 GN=AGO2 PE=1 SV=3	P	GO:0045947	negative regulation of translational initiation
Q9UKV8	AGO2_HUMAN argonaute-2 OS=Homo sapiens OX=9606 GN=AGO2 PE=1 SV=3	P	GO:0060213	positive regulation of nuclear-transcribed mRNA poly(A) tail shortening
Q9UKV8	AGO2_HUMAN argonaute-2 OS=Homo sapiens OX=9606 GN=AGO2 PE=1 SV=3	P	GO:0072091	regulation of stem cell proliferation
Q9UKV8	AGO2_HUMAN argonaute-2 OS=Homo sapiens OX=9606 GN=AGO2 PE=1 SV=3	P	GO:0090502	RNA phosphodiester bond hydrolysis, endonucleolytic
Q9UKV8	AGO2_HUMAN argonaute-2 OS=Homo sapiens OX=9606 GN=AGO2 PE=1 SV=3	P	GO:0090625	mRNA cleavage involved in gene silencing by siRNA
Q9UKV8	AGO2_HUMAN argonaute-2 OS=Homo sapiens OX=9606 GN=AGO2 PE=1 SV=3	P	GO:1901165	positive regulation of trophoblast cell migration
Q9UKV8	AGO2_HUMAN argonaute-2 OS=Homo sapiens OX=9606 GN=AGO2 PE=1 SV=3	P	GO:1901224	positive regulation of NIK/NF-kappaB signaling
Q9UKV8	AGO2_HUMAN argonaute-2 OS=Homo sapiens OX=9606 GN=AGO2 PE=1 SV=3	P	GO:1905618	positive regulation of miRNA mediated inhibition of translation
Q9UKV8	AGO2_HUMAN argonaute-2 OS=Homo sapiens OX=9606 GN=AGO2 PE=1 SV=3	C	GO:0030880	RNA polymerase complex
Q9UKV8	AGO2_HUMAN argonaute-2 OS=Homo sapiens OX=9606 GN=AGO2 PE=1 SV=3	C	GO:0005840	ribosome
Q4G0X4	KCD21_HUMANBTB POZ domain-containing KCTD21 OS=Homo sapiens OX=9606 GN=KCTD21 PE=1 SV=1	C	GO:0005829	cytosol
Q4G0X4	KCD21_HUMANBTB POZ domain-containing KCTD21 OS=Homo sapiens OX=9606 GN=KCTD21 PE=1 SV=1	C	GO:0005886	plasma membrane
Q4G0X4	KCD21_HUMANBTB POZ domain-containing KCTD21 OS=Homo sapiens OX=9606 GN=KCTD21 PE=1 SV=1	C	GO:0045202	synapse
Q4G0X4	KCD21_HUMANBTB POZ domain-containing KCTD21 OS=Homo sapiens OX=9606 GN=KCTD21 PE=1 SV=1	F	GO:0003714	transcription corepressor activity
Q4G0X4	KCD21_HUMANBTB POZ domain-containing KCTD21 OS=Homo sapiens OX=9606 GN=KCTD21 PE=1 SV=1	F	GO:0008134	transcription factor binding
Q4G0X4	KCD21_HUMANBTB POZ domain-containing KCTD21 OS=Homo sapiens OX=9606 GN=KCTD21 PE=1 SV=1	F	GO:0016740	transferase activity
Q4G0X4	KCD21_HUMANBTB POZ domain-containing KCTD21 OS=Homo sapiens OX=9606 GN=KCTD21 PE=1 SV=1	F	GO:0030506	ankyrin binding
Q4G0X4	KCD21_HUMANBTB POZ domain-containing KCTD21 OS=Homo sapiens OX=9606 GN=KCTD21 PE=1 SV=1	F	GO:0042802	identical protein binding
Q4G0X4	KCD21_HUMANBTB POZ domain-containing KCTD21 OS=Homo sapiens OX=9606 GN=KCTD21 PE=1 SV=1	F	GO:0042826	histone deacetylase binding
Q4G0X4	KCD21_HUMANBTB POZ domain-containing KCTD21 OS=Homo sapiens OX=9606 GN=KCTD21 PE=1 SV=1	F	GO:0097602	cullin family protein binding
Q4G0X4	KCD21_HUMANBTB POZ domain-containing KCTD21 OS=Homo sapiens OX=9606 GN=KCTD21 PE=1 SV=1	P	GO:0000122	negative regulation of transcription by RNA polymerase II
Q4G0X4	KCD21_HUMANBTB POZ domain-containing KCTD21 OS=Homo sapiens OX=9606 GN=KCTD21 PE=1 SV=1	P	GO:0006511	ubiquitin-dependent protein catabolic process
Q4G0X4	KCD21_HUMANBTB POZ domain-containing KCTD21 OS=Homo sapiens OX=9606 GN=KCTD21 PE=1 SV=1	P	GO:0007275	multicellular organism development
Q4G0X4	KCD21_HUMANBTB POZ domain-containing KCTD21 OS=Homo sapiens OX=9606 GN=KCTD21 PE=1 SV=1	P	GO:0016567	protein ubiquitination
Q4G0X4	KCD21_HUMANBTB POZ domain-containing KCTD21 OS=Homo sapiens OX=9606 GN=KCTD21 PE=1 SV=1	P	GO:0033146	regulation of intracellular estrogen receptor signaling pathway
Q4G0X4	KCD21_HUMANBTB POZ domain-containing KCTD21 OS=Homo sapiens OX=9606 GN=KCTD21 PE=1 SV=1	P	GO:0040008	regulation of growth
Q4G0X4	KCD21_HUMANBTB POZ domain-containing KCTD21 OS=Homo sapiens OX=9606 GN=KCTD21 PE=1 SV=1	P	GO:0043687	post-translational protein modification
Q4G0X4	KCD21_HUMANBTB POZ domain-containing KCTD21 OS=Homo sapiens OX=9606 GN=KCTD21 PE=1 SV=1	P	GO:0045879	negative regulation of smoothened signaling pathway
Q4G0X4	KCD21_HUMANBTB POZ domain-containing KCTD21 OS=Homo sapiens OX=9606 GN=KCTD21 PE=1 SV=1	P	GO:0051260	protein homooligomerization
Q4G0X4	KCD21_HUMANBTB POZ domain-containing KCTD21 OS=Homo sapiens OX=9606 GN=KCTD21 PE=1 SV=1	C	GO:0005667	transcription factor complex
Q4G0X4	KCD21_HUMANBTB POZ domain-containing KCTD21 OS=Homo sapiens OX=9606 GN=KCTD21 PE=1 SV=1	P	GO:0016481	negative regulation of transcription, DNA-templated
Q4G0X4	KCD21_HUMANBTB POZ domain-containing KCTD21 OS=Homo sapiens OX=9606 GN=KCTD21 PE=1 SV=1	C	GO:0000118	histone deacetylase complex
Q9UM22	EPDR1_HUMANMammalian ependymin-related 1 OS=Homo sapiens OX=9606 GN=EPDR1 PE=1 SV=2	C	GO:0005576	extracellular region
Q9UM22	EPDR1_HUMANMammalian ependymin-related 1 OS=Homo sapiens OX=9606 GN=EPDR1 PE=1 SV=2	C	GO:0043202	lysosomal lumen
Q9UM22	EPDR1_HUMANMammalian ependymin-related 1 OS=Homo sapiens OX=9606 GN=EPDR1 PE=1 SV=2	F	GO:0005509	calcium ion binding
Q9UM22	EPDR1_HUMANMammalian ependymin-related 1 OS=Homo sapiens OX=9606 GN=EPDR1 PE=1 SV=2	F	GO:0008289	lipid binding
Q9UM22	EPDR1_HUMANMammalian ependymin-related 1 OS=Homo sapiens OX=9606 GN=EPDR1 PE=1 SV=2	P	GO:0007160	cell-matrix adhesion
O43493	TGON2_HUMANTrans-Golgi network integral membrane 2 OS=Homo sapiens OX=9606 GN=TGOLN2 PE=1 SV=4	C	GO:0005654	nucleoplasm
O43493	TGON2_HUMANTrans-Golgi network integral membrane 2 OS=Homo sapiens OX=9606 GN=TGOLN2 PE=1 SV=4	C	GO:0005768	endosome
O43493	TGON2_HUMANTrans-Golgi network integral membrane 2 OS=Homo sapiens OX=9606 GN=TGOLN2 PE=1 SV=4	C	GO:0005788	endoplasmic reticulum lumen
O43493	TGON2_HUMANTrans-Golgi network integral membrane 2 OS=Homo sapiens OX=9606 GN=TGOLN2 PE=1 SV=4	C	GO:0005802	trans-Golgi network
O43493	TGON2_HUMANTrans-Golgi network integral membrane 2 OS=Homo sapiens OX=9606 GN=TGOLN2 PE=1 SV=4	C	GO:0005886	plasma membrane
O43493	TGON2_HUMANTrans-Golgi network integral membrane 2 OS=Homo sapiens OX=9606 GN=TGOLN2 PE=1 SV=4	C	GO:0016021	integral component of membrane
O43493	TGON2_HUMANTrans-Golgi network integral membrane 2 OS=Homo sapiens OX=9606 GN=TGOLN2 PE=1 SV=4	C	GO:0030140	trans-Golgi network transport vesicle
O43493	TGON2_HUMANTrans-Golgi network integral membrane 2 OS=Homo sapiens OX=9606 GN=TGOLN2 PE=1 SV=4	C	GO:0030665	clathrin-coated vesicle membrane
O43493	TGON2_HUMANTrans-Golgi network integral membrane 2 OS=Homo sapiens OX=9606 GN=TGOLN2 PE=1 SV=4	F	GO:0005515	protein binding
O43493	TGON2_HUMANTrans-Golgi network integral membrane 2 OS=Homo sapiens OX=9606 GN=TGOLN2 PE=1 SV=4	P	GO:0043687	post-translational protein modification
O43493	TGON2_HUMANTrans-Golgi network integral membrane 2 OS=Homo sapiens OX=9606 GN=TGOLN2 PE=1 SV=4	P	GO:0061024	membrane organization
Q5JS37	NHLC3_HUMANNHL repeat-containing 3 OS=Homo sapiens OX=9606 GN=NHLRC3 PE=2 SV=1	C	GO:0005576	extracellular region
Q5JS37	NHLC3_HUMANNHL repeat-containing 3 OS=Homo sapiens OX=9606 GN=NHLRC3 PE=2 SV=1	C	GO:0035578	azurophil granule lumen
Q5JS37	NHLC3_HUMANNHL repeat-containing 3 OS=Homo sapiens OX=9606 GN=NHLRC3 PE=2 SV=1	F	GO:0005515	protein binding
Q5JS37	NHLC3_HUMANNHL repeat-containing 3 OS=Homo sapiens OX=9606 GN=NHLRC3 PE=2 SV=1	F	GO:0016829	lyase activity
Q5JS37	NHLC3_HUMANNHL repeat-containing 3 OS=Homo sapiens OX=9606 GN=NHLRC3 PE=2 SV=1	F	GO:0061630	ubiquitin protein ligase activity
Q5JS37	NHLC3_HUMANNHL repeat-containing 3 OS=Homo sapiens OX=9606 GN=NHLRC3 PE=2 SV=1	P	GO:0000209	protein polyubiquitination
Q5JS37	NHLC3_HUMANNHL repeat-containing 3 OS=Homo sapiens OX=9606 GN=NHLRC3 PE=2 SV=1	P	GO:0007399	nervous system development
Q5JS37	NHLC3_HUMANNHL repeat-containing 3 OS=Homo sapiens OX=9606 GN=NHLRC3 PE=2 SV=1	P	GO:0010608	posttranscriptional regulation of gene expression
Q5JS37	NHLC3_HUMANNHL repeat-containing 3 OS=Homo sapiens OX=9606 GN=NHLRC3 PE=2 SV=1	P	GO:0010629	negative regulation of gene expression
Q5JS37	NHLC3_HUMANNHL repeat-containing 3 OS=Homo sapiens OX=9606 GN=NHLRC3 PE=2 SV=1	P	GO:0043161	proteasome-mediated ubiquitin-dependent protein catabolic process
Q5JS37	NHLC3_HUMANNHL repeat-containing 3 OS=Homo sapiens OX=9606 GN=NHLRC3 PE=2 SV=1	P	GO:0043312	neutrophil degranulation
Q5JS37	NHLC3_HUMANNHL repeat-containing 3 OS=Homo sapiens OX=9606 GN=NHLRC3 PE=2 SV=1	P	GO:0050794	regulation of cellular process
Q5JS37	NHLC3_HUMANNHL repeat-containing 3 OS=Homo sapiens OX=9606 GN=NHLRC3 PE=2 SV=1	P	GO:0051246	regulation of protein metabolic process
P15509	CSF2R_HUMANGranulocyte-macrophage colony-stimulating factor receptor subunit alpha OS=Homo sapiens OX=9606 GN=CSF2RA PE=1 SV=1	C	GO:0005576	extracellular region
P15509	CSF2R_HUMANGranulocyte-macrophage colony-stimulating factor receptor subunit alpha OS=Homo sapiens OX=9606 GN=CSF2RA PE=1 SV=1	C	GO:0005887	integral component of plasma membrane
P15509	CSF2R_HUMANGranulocyte-macrophage colony-stimulating factor receptor subunit alpha OS=Homo sapiens OX=9606 GN=CSF2RA PE=1 SV=1	C	GO:0009897	external side of plasma membrane
P15509	CSF2R_HUMANGranulocyte-macrophage colony-stimulating factor receptor subunit alpha OS=Homo sapiens OX=9606 GN=CSF2RA PE=1 SV=1	C	GO:0043235	receptor complex
P15509	CSF2R_HUMANGranulocyte-macrophage colony-stimulating factor receptor subunit alpha OS=Homo sapiens OX=9606 GN=CSF2RA PE=1 SV=1	F	GO:0004896	cytokine receptor activity
P15509	CSF2R_HUMANGranulocyte-macrophage colony-stimulating factor receptor subunit alpha OS=Homo sapiens OX=9606 GN=CSF2RA PE=1 SV=1	F	GO:0019955	cytokine binding
P15509	CSF2R_HUMANGranulocyte-macrophage colony-stimulating factor receptor subunit alpha OS=Homo sapiens OX=9606 GN=CSF2RA PE=1 SV=1	P	GO:0000165	MAPK cascade
P15509	CSF2R_HUMANGranulocyte-macrophage colony-stimulating factor receptor subunit alpha OS=Homo sapiens OX=9606 GN=CSF2RA PE=1 SV=1	P	GO:0019221	cytokine-mediated signaling pathway
P15509	CSF2R_HUMANGranulocyte-macrophage colony-stimulating factor receptor subunit alpha OS=Homo sapiens OX=9606 GN=CSF2RA PE=1 SV=1	P	GO:0048518	positive regulation of biological process
Q2TB90	HKDC1_HUMANHexokinase HKDC1 OS=Homo sapiens OX=9606 GN=HKDC1 PE=1 SV=3	C	GO:0005576	extracellular region
Q2TB90	HKDC1_HUMANHexokinase HKDC1 OS=Homo sapiens OX=9606 GN=HKDC1 PE=1 SV=3	C	GO:0005654	nucleoplasm
Q2TB90	HKDC1_HUMANHexokinase HKDC1 OS=Homo sapiens OX=9606 GN=HKDC1 PE=1 SV=3	C	GO:0005741	mitochondrial outer membrane
Q2TB90	HKDC1_HUMANHexokinase HKDC1 OS=Homo sapiens OX=9606 GN=HKDC1 PE=1 SV=3	C	GO:0005829	cytosol
Q2TB90	HKDC1_HUMANHexokinase HKDC1 OS=Homo sapiens OX=9606 GN=HKDC1 PE=1 SV=3	C	GO:0034774	secretory granule lumen
Q2TB90	HKDC1_HUMANHexokinase HKDC1 OS=Homo sapiens OX=9606 GN=HKDC1 PE=1 SV=3	C	GO:1904813	ficolin-1-rich granule lumen
Q2TB90	HKDC1_HUMANHexokinase HKDC1 OS=Homo sapiens OX=9606 GN=HKDC1 PE=1 SV=3	F	GO:0004340	glucokinase activity
Q2TB90	HKDC1_HUMANHexokinase HKDC1 OS=Homo sapiens OX=9606 GN=HKDC1 PE=1 SV=3	F	GO:0005524	ATP binding
Q2TB90	HKDC1_HUMANHexokinase HKDC1 OS=Homo sapiens OX=9606 GN=HKDC1 PE=1 SV=3	F	GO:0005536	glucose binding
Q2TB90	HKDC1_HUMANHexokinase HKDC1 OS=Homo sapiens OX=9606 GN=HKDC1 PE=1 SV=3	F	GO:0008865	fructokinase activity
Q2TB90	HKDC1_HUMANHexokinase HKDC1 OS=Homo sapiens OX=9606 GN=HKDC1 PE=1 SV=3	F	GO:0019158	mannokinase activity
Q2TB90	HKDC1_HUMANHexokinase HKDC1 OS=Homo sapiens OX=9606 GN=HKDC1 PE=1 SV=3	F	GO:0042802	identical protein binding
Q2TB90	HKDC1_HUMANHexokinase HKDC1 OS=Homo sapiens OX=9606 GN=HKDC1 PE=1 SV=3	P	GO:0001666	response to hypoxia
Q2TB90	HKDC1_HUMANHexokinase HKDC1 OS=Homo sapiens OX=9606 GN=HKDC1 PE=1 SV=3	P	GO:0001678	cellular glucose homeostasis
Q2TB90	HKDC1_HUMANHexokinase HKDC1 OS=Homo sapiens OX=9606 GN=HKDC1 PE=1 SV=3	P	GO:0002741	positive regulation of cytokine secretion involved in immune response
Q2TB90	HKDC1_HUMANHexokinase HKDC1 OS=Homo sapiens OX=9606 GN=HKDC1 PE=1 SV=3	P	GO:0002931	response to ischemia
Q2TB90	HKDC1_HUMANHexokinase HKDC1 OS=Homo sapiens OX=9606 GN=HKDC1 PE=1 SV=3	P	GO:0006002	fructose 6-phosphate metabolic process
Q2TB90	HKDC1_HUMANHexokinase HKDC1 OS=Homo sapiens OX=9606 GN=HKDC1 PE=1 SV=3	P	GO:0006013	mannose metabolic process
Q2TB90	HKDC1_HUMANHexokinase HKDC1 OS=Homo sapiens OX=9606 GN=HKDC1 PE=1 SV=3	P	GO:0006110	regulation of glycolytic process
Q2TB90	HKDC1_HUMANHexokinase HKDC1 OS=Homo sapiens OX=9606 GN=HKDC1 PE=1 SV=3	P	GO:0006954	inflammatory response
Q2TB90	HKDC1_HUMANHexokinase HKDC1 OS=Homo sapiens OX=9606 GN=HKDC1 PE=1 SV=3	P	GO:0007595	lactation
Q2TB90	HKDC1_HUMANHexokinase HKDC1 OS=Homo sapiens OX=9606 GN=HKDC1 PE=1 SV=3	P	GO:0008637	apoptotic mitochondrial changes
Q2TB90	HKDC1_HUMANHexokinase HKDC1 OS=Homo sapiens OX=9606 GN=HKDC1 PE=1 SV=3	P	GO:0032024	positive regulation of insulin secretion
Q2TB90	HKDC1_HUMANHexokinase HKDC1 OS=Homo sapiens OX=9606 GN=HKDC1 PE=1 SV=3	P	GO:0032869	cellular response to insulin stimulus
Q2TB90	HKDC1_HUMANHexokinase HKDC1 OS=Homo sapiens OX=9606 GN=HKDC1 PE=1 SV=3	P	GO:0035795	negative regulation of mitochondrial membrane permeability
Q2TB90	HKDC1_HUMANHexokinase HKDC1 OS=Homo sapiens OX=9606 GN=HKDC1 PE=1 SV=3	P	GO:0043312	neutrophil degranulation
Q2TB90	HKDC1_HUMANHexokinase HKDC1 OS=Homo sapiens OX=9606 GN=HKDC1 PE=1 SV=3	P	GO:0044320	cellular response to leptin stimulus
Q2TB90	HKDC1_HUMANHexokinase HKDC1 OS=Homo sapiens OX=9606 GN=HKDC1 PE=1 SV=3	P	GO:0045087	innate immune response
Q2TB90	HKDC1_HUMANHexokinase HKDC1 OS=Homo sapiens OX=9606 GN=HKDC1 PE=1 SV=3	P	GO:0045721	negative regulation of gluconeogenesis
Q2TB90	HKDC1_HUMANHexokinase HKDC1 OS=Homo sapiens OX=9606 GN=HKDC1 PE=1 SV=3	P	GO:0045725	positive regulation of glycogen biosynthetic process
Q2TB90	HKDC1_HUMANHexokinase HKDC1 OS=Homo sapiens OX=9606 GN=HKDC1 PE=1 SV=3	P	GO:0046324	regulation of glucose import
Q2TB90	HKDC1_HUMANHexokinase HKDC1 OS=Homo sapiens OX=9606 GN=HKDC1 PE=1 SV=3	P	GO:0046835	carbohydrate phosphorylation
Q2TB90	HKDC1_HUMANHexokinase HKDC1 OS=Homo sapiens OX=9606 GN=HKDC1 PE=1 SV=3	P	GO:0050718	positive regulation of interleukin-1 beta secretion
Q2TB90	HKDC1_HUMANHexokinase HKDC1 OS=Homo sapiens OX=9606 GN=HKDC1 PE=1 SV=3	P	GO:0051156	glucose 6-phosphate metabolic process
Q2TB90	HKDC1_HUMANHexokinase HKDC1 OS=Homo sapiens OX=9606 GN=HKDC1 PE=1 SV=3	P	GO:0051594	detection of glucose
Q2TB90	HKDC1_HUMANHexokinase HKDC1 OS=Homo sapiens OX=9606 GN=HKDC1 PE=1 SV=3	P	GO:0061621	canonical glycolysis
Q2TB90	HKDC1_HUMANHexokinase HKDC1 OS=Homo sapiens OX=9606 GN=HKDC1 PE=1 SV=3	P	GO:0072656	maintenance of protein location in mitochondrion
Q2TB90	HKDC1_HUMANHexokinase HKDC1 OS=Homo sapiens OX=9606 GN=HKDC1 PE=1 SV=3	P	GO:1904925	positive regulation of autophagy of mitochondrion in response to mitochondrial depolarization
Q2TB90	HKDC1_HUMANHexokinase HKDC1 OS=Homo sapiens OX=9606 GN=HKDC1 PE=1 SV=3	P	GO:1990830	cellular response to leukemia inhibitory factor
Q2TB90	HKDC1_HUMANHexokinase HKDC1 OS=Homo sapiens OX=9606 GN=HKDC1 PE=1 SV=3	P	GO:0005982	starch metabolic process
Q2TB90	HKDC1_HUMANHexokinase HKDC1 OS=Homo sapiens OX=9606 GN=HKDC1 PE=1 SV=3	P	GO:0005985	sucrose metabolic process
Q2TB90	HKDC1_HUMANHexokinase HKDC1 OS=Homo sapiens OX=9606 GN=HKDC1 PE=1 SV=3	P	GO:0006012	galactose metabolic process
Q2TB90	HKDC1_HUMANHexokinase HKDC1 OS=Homo sapiens OX=9606 GN=HKDC1 PE=1 SV=3	P	GO:0019872	streptomycin biosynthetic process
Q2TB90	HKDC1_HUMANHexokinase HKDC1 OS=Homo sapiens OX=9606 GN=HKDC1 PE=1 SV=3	P	GO:0006000	fructose metabolic process
P49662	CASP4_HUMANCaspase-4 OS=Homo sapiens OX=9606 GN=CASP4 PE=1 SV=1	C	GO:0005576	extracellular region
P49662	CASP4_HUMANCaspase-4 OS=Homo sapiens OX=9606 GN=CASP4 PE=1 SV=1	C	GO:0005739	mitochondrion
P49662	CASP4_HUMANCaspase-4 OS=Homo sapiens OX=9606 GN=CASP4 PE=1 SV=1	C	GO:0005789	endoplasmic reticulum membrane
P49662	CASP4_HUMANCaspase-4 OS=Homo sapiens OX=9606 GN=CASP4 PE=1 SV=1	C	GO:0005886	plasma membrane
P49662	CASP4_HUMANCaspase-4 OS=Homo sapiens OX=9606 GN=CASP4 PE=1 SV=1	C	GO:0072557	IPAF inflammasome complex
P49662	CASP4_HUMANCaspase-4 OS=Homo sapiens OX=9606 GN=CASP4 PE=1 SV=1	C	GO:0072558	NLRP1 inflammasome complex
P49662	CASP4_HUMANCaspase-4 OS=Homo sapiens OX=9606 GN=CASP4 PE=1 SV=1	C	GO:0072559	NLRP3 inflammasome complex
P49662	CASP4_HUMANCaspase-4 OS=Homo sapiens OX=9606 GN=CASP4 PE=1 SV=1	C	GO:0097169	AIM2 inflammasome complex
P49662	CASP4_HUMANCaspase-4 OS=Homo sapiens OX=9606 GN=CASP4 PE=1 SV=1	C	GO:0097179	protease inhibitor complex
P49662	CASP4_HUMANCaspase-4 OS=Homo sapiens OX=9606 GN=CASP4 PE=1 SV=1	F	GO:0008656	cysteine-type endopeptidase activator activity involved in apoptotic process
P49662	CASP4_HUMANCaspase-4 OS=Homo sapiens OX=9606 GN=CASP4 PE=1 SV=1	F	GO:0019900	kinase binding
P49662	CASP4_HUMANCaspase-4 OS=Homo sapiens OX=9606 GN=CASP4 PE=1 SV=1	F	GO:0042802	identical protein binding
P49662	CASP4_HUMANCaspase-4 OS=Homo sapiens OX=9606 GN=CASP4 PE=1 SV=1	F	GO:0050700	CARD domain binding
P49662	CASP4_HUMANCaspase-4 OS=Homo sapiens OX=9606 GN=CASP4 PE=1 SV=1	F	GO:0097199	cysteine-type endopeptidase activity involved in apoptotic signaling pathway
P49662	CASP4_HUMANCaspase-4 OS=Homo sapiens OX=9606 GN=CASP4 PE=1 SV=1	P	GO:0006919	activation of cysteine-type endopeptidase activity involved in apoptotic process
P49662	CASP4_HUMANCaspase-4 OS=Homo sapiens OX=9606 GN=CASP4 PE=1 SV=1	P	GO:0006974	cellular response to DNA damage stimulus
P49662	CASP4_HUMANCaspase-4 OS=Homo sapiens OX=9606 GN=CASP4 PE=1 SV=1	P	GO:0007399	nervous system development
P49662	CASP4_HUMANCaspase-4 OS=Homo sapiens OX=9606 GN=CASP4 PE=1 SV=1	P	GO:0008544	epidermis development
P49662	CASP4_HUMANCaspase-4 OS=Homo sapiens OX=9606 GN=CASP4 PE=1 SV=1	P	GO:0014070	response to organic cyclic compound
P49662	CASP4_HUMANCaspase-4 OS=Homo sapiens OX=9606 GN=CASP4 PE=1 SV=1	P	GO:0016540	protein autoprocessing
P49662	CASP4_HUMANCaspase-4 OS=Homo sapiens OX=9606 GN=CASP4 PE=1 SV=1	P	GO:0030154	cell differentiation
P49662	CASP4_HUMANCaspase-4 OS=Homo sapiens OX=9606 GN=CASP4 PE=1 SV=1	P	GO:0043123	positive regulation of I-kappaB kinase/NF-kappaB signaling
P49662	CASP4_HUMANCaspase-4 OS=Homo sapiens OX=9606 GN=CASP4 PE=1 SV=1	P	GO:0045786	negative regulation of cell cycle
P49662	CASP4_HUMANCaspase-4 OS=Homo sapiens OX=9606 GN=CASP4 PE=1 SV=1	P	GO:0048513	animal organ development
P49662	CASP4_HUMANCaspase-4 OS=Homo sapiens OX=9606 GN=CASP4 PE=1 SV=1	P	GO:0050718	positive regulation of interleukin-1 beta secretion
P49662	CASP4_HUMANCaspase-4 OS=Homo sapiens OX=9606 GN=CASP4 PE=1 SV=1	P	GO:0050727	regulation of inflammatory response
P49662	CASP4_HUMANCaspase-4 OS=Homo sapiens OX=9606 GN=CASP4 PE=1 SV=1	P	GO:0060429	epithelium development
P49662	CASP4_HUMANCaspase-4 OS=Homo sapiens OX=9606 GN=CASP4 PE=1 SV=1	P	GO:0065008	regulation of biological quality
P49662	CASP4_HUMANCaspase-4 OS=Homo sapiens OX=9606 GN=CASP4 PE=1 SV=1	P	GO:0070059	intrinsic apoptotic signaling pathway in response to endoplasmic reticulum stress
P49662	CASP4_HUMANCaspase-4 OS=Homo sapiens OX=9606 GN=CASP4 PE=1 SV=1	P	GO:0071222	cellular response to lipopolysaccharide
P49662	CASP4_HUMANCaspase-4 OS=Homo sapiens OX=9606 GN=CASP4 PE=1 SV=1	P	GO:0071260	cellular response to mechanical stimulus
P49662	CASP4_HUMANCaspase-4 OS=Homo sapiens OX=9606 GN=CASP4 PE=1 SV=1	P	GO:0071346	cellular response to interferon-gamma
P49662	CASP4_HUMANCaspase-4 OS=Homo sapiens OX=9606 GN=CASP4 PE=1 SV=1	P	GO:1903265	positive regulation of tumor necrosis factor-mediated signaling pathway
P49662	CASP4_HUMANCaspase-4 OS=Homo sapiens OX=9606 GN=CASP4 PE=1 SV=1	P	GO:1904646	cellular response to amyloid-beta
P49662	CASP4_HUMANCaspase-4 OS=Homo sapiens OX=9606 GN=CASP4 PE=1 SV=1	C	GO:0008303	caspase complex
O14832	PAHX_HUMANPhytanoyl- peroxisomal OS=Homo sapiens OX=9606 GN=PHYH PE=1 SV=1	C	GO:0005739	mitochondrion
O14832	PAHX_HUMANPhytanoyl- peroxisomal OS=Homo sapiens OX=9606 GN=PHYH PE=1 SV=1	C	GO:0005782	peroxisomal matrix
O14832	PAHX_HUMANPhytanoyl- peroxisomal OS=Homo sapiens OX=9606 GN=PHYH PE=1 SV=1	C	GO:0005829	cytosol
O14832	PAHX_HUMANPhytanoyl- peroxisomal OS=Homo sapiens OX=9606 GN=PHYH PE=1 SV=1	F	GO:0005515	protein binding
O14832	PAHX_HUMANPhytanoyl- peroxisomal OS=Homo sapiens OX=9606 GN=PHYH PE=1 SV=1	F	GO:0008198	ferrous iron binding
O14832	PAHX_HUMANPhytanoyl- peroxisomal OS=Homo sapiens OX=9606 GN=PHYH PE=1 SV=1	F	GO:0031418	L-ascorbic acid binding
O14832	PAHX_HUMANPhytanoyl- peroxisomal OS=Homo sapiens OX=9606 GN=PHYH PE=1 SV=1	F	GO:0048244	phytanoyl-CoA dioxygenase activity
O14832	PAHX_HUMANPhytanoyl- peroxisomal OS=Homo sapiens OX=9606 GN=PHYH PE=1 SV=1	P	GO:0001561	fatty acid alpha-oxidation
O14832	PAHX_HUMANPhytanoyl- peroxisomal OS=Homo sapiens OX=9606 GN=PHYH PE=1 SV=1	P	GO:0006103	2-oxoglutarate metabolic process
O14832	PAHX_HUMANPhytanoyl- peroxisomal OS=Homo sapiens OX=9606 GN=PHYH PE=1 SV=1	P	GO:0006625	protein targeting to peroxisome
O14832	PAHX_HUMANPhytanoyl- peroxisomal OS=Homo sapiens OX=9606 GN=PHYH PE=1 SV=1	P	GO:0006720	isoprenoid metabolic process
O14832	PAHX_HUMANPhytanoyl- peroxisomal OS=Homo sapiens OX=9606 GN=PHYH PE=1 SV=1	P	GO:0019606	2-oxobutyrate catabolic process
O14832	PAHX_HUMANPhytanoyl- peroxisomal OS=Homo sapiens OX=9606 GN=PHYH PE=1 SV=1	P	GO:0097089	methyl-branched fatty acid metabolic process
P00749	UROK_HUMANUrokinase-type plasminogen activator OS=Homo sapiens OX=9606 GN=PLAU PE=1 SV=2	C	GO:0005615	extracellular space
P00749	UROK_HUMANUrokinase-type plasminogen activator OS=Homo sapiens OX=9606 GN=PLAU PE=1 SV=2	C	GO:0005886	plasma membrane
P00749	UROK_HUMANUrokinase-type plasminogen activator OS=Homo sapiens OX=9606 GN=PLAU PE=1 SV=2	C	GO:0009986	cell surface
P00749	UROK_HUMANUrokinase-type plasminogen activator OS=Homo sapiens OX=9606 GN=PLAU PE=1 SV=2	C	GO:0035579	specific granule membrane
P00749	UROK_HUMANUrokinase-type plasminogen activator OS=Homo sapiens OX=9606 GN=PLAU PE=1 SV=2	C	GO:0070821	tertiary granule membrane
P00749	UROK_HUMANUrokinase-type plasminogen activator OS=Homo sapiens OX=9606 GN=PLAU PE=1 SV=2	F	GO:0004252	serine-type endopeptidase activity
P00749	UROK_HUMANUrokinase-type plasminogen activator OS=Homo sapiens OX=9606 GN=PLAU PE=1 SV=2	F	GO:0005515	protein binding
P00749	UROK_HUMANUrokinase-type plasminogen activator OS=Homo sapiens OX=9606 GN=PLAU PE=1 SV=2	P	GO:0001666	response to hypoxia
P00749	UROK_HUMANUrokinase-type plasminogen activator OS=Homo sapiens OX=9606 GN=PLAU PE=1 SV=2	P	GO:0006935	chemotaxis
P00749	UROK_HUMANUrokinase-type plasminogen activator OS=Homo sapiens OX=9606 GN=PLAU PE=1 SV=2	P	GO:0010469	regulation of signaling receptor activity
P00749	UROK_HUMANUrokinase-type plasminogen activator OS=Homo sapiens OX=9606 GN=PLAU PE=1 SV=2	P	GO:0014910	regulation of smooth muscle cell migration
P00749	UROK_HUMANUrokinase-type plasminogen activator OS=Homo sapiens OX=9606 GN=PLAU PE=1 SV=2	P	GO:0030335	positive regulation of cell migration
P00749	UROK_HUMANUrokinase-type plasminogen activator OS=Homo sapiens OX=9606 GN=PLAU PE=1 SV=2	P	GO:0031639	plasminogen activation
P00749	UROK_HUMANUrokinase-type plasminogen activator OS=Homo sapiens OX=9606 GN=PLAU PE=1 SV=2	P	GO:0033628	regulation of cell adhesion mediated by integrin
P00749	UROK_HUMANUrokinase-type plasminogen activator OS=Homo sapiens OX=9606 GN=PLAU PE=1 SV=2	P	GO:0042127	regulation of cell population proliferation
P00749	UROK_HUMANUrokinase-type plasminogen activator OS=Homo sapiens OX=9606 GN=PLAU PE=1 SV=2	P	GO:0042730	fibrinolysis
P00749	UROK_HUMANUrokinase-type plasminogen activator OS=Homo sapiens OX=9606 GN=PLAU PE=1 SV=2	P	GO:0043312	neutrophil degranulation
P00749	UROK_HUMANUrokinase-type plasminogen activator OS=Homo sapiens OX=9606 GN=PLAU PE=1 SV=2	P	GO:0045861	negative regulation of proteolysis
P00749	UROK_HUMANUrokinase-type plasminogen activator OS=Homo sapiens OX=9606 GN=PLAU PE=1 SV=2	P	GO:0051240	positive regulation of multicellular organismal process
P00749	UROK_HUMANUrokinase-type plasminogen activator OS=Homo sapiens OX=9606 GN=PLAU PE=1 SV=2	P	GO:2000097	regulation of smooth muscle cell-matrix adhesion
P20908	CO5A1_HUMANCollagen alpha-1(V) chain OS=Homo sapiens OX=9606 GN=COL5A1 PE=1 SV=3	C	GO:0005588	collagen type V trimer
P20908	CO5A1_HUMANCollagen alpha-1(V) chain OS=Homo sapiens OX=9606 GN=COL5A1 PE=1 SV=3	C	GO:0005592	collagen type XI trimer
P20908	CO5A1_HUMANCollagen alpha-1(V) chain OS=Homo sapiens OX=9606 GN=COL5A1 PE=1 SV=3	C	GO:0005615	extracellular space
P20908	CO5A1_HUMANCollagen alpha-1(V) chain OS=Homo sapiens OX=9606 GN=COL5A1 PE=1 SV=3	C	GO:0005788	endoplasmic reticulum lumen
P20908	CO5A1_HUMANCollagen alpha-1(V) chain OS=Homo sapiens OX=9606 GN=COL5A1 PE=1 SV=3	F	GO:0005178	integrin binding
P20908	CO5A1_HUMANCollagen alpha-1(V) chain OS=Homo sapiens OX=9606 GN=COL5A1 PE=1 SV=3	F	GO:0008201	heparin binding
P20908	CO5A1_HUMANCollagen alpha-1(V) chain OS=Homo sapiens OX=9606 GN=COL5A1 PE=1 SV=3	F	GO:0030020	extracellular matrix structural constituent conferring tensile strength
P20908	CO5A1_HUMANCollagen alpha-1(V) chain OS=Homo sapiens OX=9606 GN=COL5A1 PE=1 SV=3	F	GO:0030674	protein binding, bridging
P20908	CO5A1_HUMANCollagen alpha-1(V) chain OS=Homo sapiens OX=9606 GN=COL5A1 PE=1 SV=3	F	GO:0046872	metal ion binding
P20908	CO5A1_HUMANCollagen alpha-1(V) chain OS=Homo sapiens OX=9606 GN=COL5A1 PE=1 SV=3	F	GO:0050840	extracellular matrix binding
P20908	CO5A1_HUMANCollagen alpha-1(V) chain OS=Homo sapiens OX=9606 GN=COL5A1 PE=1 SV=3	F	GO:1904399	heparan sulfate binding
P20908	CO5A1_HUMANCollagen alpha-1(V) chain OS=Homo sapiens OX=9606 GN=COL5A1 PE=1 SV=3	P	GO:0001502	cartilage condensation
P20908	CO5A1_HUMANCollagen alpha-1(V) chain OS=Homo sapiens OX=9606 GN=COL5A1 PE=1 SV=3	P	GO:0001503	ossification
P20908	CO5A1_HUMANCollagen alpha-1(V) chain OS=Homo sapiens OX=9606 GN=COL5A1 PE=1 SV=3	P	GO:0002063	chondrocyte development
P20908	CO5A1_HUMANCollagen alpha-1(V) chain OS=Homo sapiens OX=9606 GN=COL5A1 PE=1 SV=3	P	GO:0003007	heart morphogenesis
P20908	CO5A1_HUMANCollagen alpha-1(V) chain OS=Homo sapiens OX=9606 GN=COL5A1 PE=1 SV=3	P	GO:0007155	cell adhesion
P20908	CO5A1_HUMANCollagen alpha-1(V) chain OS=Homo sapiens OX=9606 GN=COL5A1 PE=1 SV=3	P	GO:0007601	visual perception
P20908	CO5A1_HUMANCollagen alpha-1(V) chain OS=Homo sapiens OX=9606 GN=COL5A1 PE=1 SV=3	P	GO:0010033	response to organic substance
P20908	CO5A1_HUMANCollagen alpha-1(V) chain OS=Homo sapiens OX=9606 GN=COL5A1 PE=1 SV=3	P	GO:0030199	collagen fibril organization
P20908	CO5A1_HUMANCollagen alpha-1(V) chain OS=Homo sapiens OX=9606 GN=COL5A1 PE=1 SV=3	P	GO:0032964	collagen biosynthetic process
P20908	CO5A1_HUMANCollagen alpha-1(V) chain OS=Homo sapiens OX=9606 GN=COL5A1 PE=1 SV=3	P	GO:0035987	endodermal cell differentiation
P20908	CO5A1_HUMANCollagen alpha-1(V) chain OS=Homo sapiens OX=9606 GN=COL5A1 PE=1 SV=3	P	GO:0035989	tendon development
P20908	CO5A1_HUMANCollagen alpha-1(V) chain OS=Homo sapiens OX=9606 GN=COL5A1 PE=1 SV=3	P	GO:0042472	inner ear morphogenesis
P20908	CO5A1_HUMANCollagen alpha-1(V) chain OS=Homo sapiens OX=9606 GN=COL5A1 PE=1 SV=3	P	GO:0045112	integrin biosynthetic process
P20908	CO5A1_HUMANCollagen alpha-1(V) chain OS=Homo sapiens OX=9606 GN=COL5A1 PE=1 SV=3	P	GO:0048592	eye morphogenesis
P20908	CO5A1_HUMANCollagen alpha-1(V) chain OS=Homo sapiens OX=9606 GN=COL5A1 PE=1 SV=3	P	GO:0050910	detection of mechanical stimulus involved in sensory perception of sound
P20908	CO5A1_HUMANCollagen alpha-1(V) chain OS=Homo sapiens OX=9606 GN=COL5A1 PE=1 SV=3	P	GO:0007165	signal transduction
P20908	CO5A1_HUMANCollagen alpha-1(V) chain OS=Homo sapiens OX=9606 GN=COL5A1 PE=1 SV=3	C	GO:0008305	integrin complex
P20908	CO5A1_HUMANCollagen alpha-1(V) chain OS=Homo sapiens OX=9606 GN=COL5A1 PE=1 SV=3	C	GO:0005578	extracellular matrix
Q14764	MVP_HUMANMajor vault OS=Homo sapiens OX=9606 GN=MVP PE=1 SV=4	C	GO:0005576	extracellular region
Q14764	MVP_HUMANMajor vault OS=Homo sapiens OX=9606 GN=MVP PE=1 SV=4	C	GO:0005643	nuclear pore
Q14764	MVP_HUMANMajor vault OS=Homo sapiens OX=9606 GN=MVP PE=1 SV=4	C	GO:0005829	cytosol
Q14764	MVP_HUMANMajor vault OS=Homo sapiens OX=9606 GN=MVP PE=1 SV=4	C	GO:0005856	cytoskeleton
Q14764	MVP_HUMANMajor vault OS=Homo sapiens OX=9606 GN=MVP PE=1 SV=4	C	GO:0034774	secretory granule lumen
Q14764	MVP_HUMANMajor vault OS=Homo sapiens OX=9606 GN=MVP PE=1 SV=4	C	GO:0048471	perinuclear region of cytoplasm
Q14764	MVP_HUMANMajor vault OS=Homo sapiens OX=9606 GN=MVP PE=1 SV=4	C	GO:1904813	ficolin-1-rich granule lumen
Q14764	MVP_HUMANMajor vault OS=Homo sapiens OX=9606 GN=MVP PE=1 SV=4	F	GO:0019901	protein kinase binding
Q14764	MVP_HUMANMajor vault OS=Homo sapiens OX=9606 GN=MVP PE=1 SV=4	F	GO:0019903	protein phosphatase binding
Q14764	MVP_HUMANMajor vault OS=Homo sapiens OX=9606 GN=MVP PE=1 SV=4	F	GO:0042802	identical protein binding
Q14764	MVP_HUMANMajor vault OS=Homo sapiens OX=9606 GN=MVP PE=1 SV=4	P	GO:0015031	protein transport
Q14764	MVP_HUMANMajor vault OS=Homo sapiens OX=9606 GN=MVP PE=1 SV=4	P	GO:0023057	negative regulation of signaling
Q14764	MVP_HUMANMajor vault OS=Homo sapiens OX=9606 GN=MVP PE=1 SV=4	P	GO:0031953	negative regulation of protein autophosphorylation
Q14764	MVP_HUMANMajor vault OS=Homo sapiens OX=9606 GN=MVP PE=1 SV=4	P	GO:0038127	ERBB signaling pathway
Q14764	MVP_HUMANMajor vault OS=Homo sapiens OX=9606 GN=MVP PE=1 SV=4	P	GO:0043312	neutrophil degranulation
Q14764	MVP_HUMANMajor vault OS=Homo sapiens OX=9606 GN=MVP PE=1 SV=4	P	GO:0051028	mRNA transport
Q14764	MVP_HUMANMajor vault OS=Homo sapiens OX=9606 GN=MVP PE=1 SV=4	P	GO:0061099	negative regulation of protein tyrosine kinase activity
P43121	MUC18_HUMANCell surface glyco MUC18 OS=Homo sapiens OX=9606 GN=MCAM PE=1 SV=2	C	GO:0005615	extracellular space
P43121	MUC18_HUMANCell surface glyco MUC18 OS=Homo sapiens OX=9606 GN=MCAM PE=1 SV=2	C	GO:0005634	nucleus
P43121	MUC18_HUMANCell surface glyco MUC18 OS=Homo sapiens OX=9606 GN=MCAM PE=1 SV=2	C	GO:0009897	external side of plasma membrane
P43121	MUC18_HUMANCell surface glyco MUC18 OS=Homo sapiens OX=9606 GN=MCAM PE=1 SV=2	C	GO:0016021	integral component of membrane
P43121	MUC18_HUMANCell surface glyco MUC18 OS=Homo sapiens OX=9606 GN=MCAM PE=1 SV=2	F	GO:0005515	protein binding
P43121	MUC18_HUMANCell surface glyco MUC18 OS=Homo sapiens OX=9606 GN=MCAM PE=1 SV=2	P	GO:0001819	positive regulation of cytokine production
P43121	MUC18_HUMANCell surface glyco MUC18 OS=Homo sapiens OX=9606 GN=MCAM PE=1 SV=2	P	GO:0002682	regulation of immune system process
P43121	MUC18_HUMANCell surface glyco MUC18 OS=Homo sapiens OX=9606 GN=MCAM PE=1 SV=2	P	GO:0003094	glomerular filtration
P43121	MUC18_HUMANCell surface glyco MUC18 OS=Homo sapiens OX=9606 GN=MCAM PE=1 SV=2	P	GO:0006952	defense response
P43121	MUC18_HUMANCell surface glyco MUC18 OS=Homo sapiens OX=9606 GN=MCAM PE=1 SV=2	P	GO:0007155	cell adhesion
P43121	MUC18_HUMANCell surface glyco MUC18 OS=Homo sapiens OX=9606 GN=MCAM PE=1 SV=2	P	GO:0007417	central nervous system development
P43121	MUC18_HUMANCell surface glyco MUC18 OS=Homo sapiens OX=9606 GN=MCAM PE=1 SV=2	P	GO:0010556	regulation of macromolecule biosynthetic process
P43121	MUC18_HUMANCell surface glyco MUC18 OS=Homo sapiens OX=9606 GN=MCAM PE=1 SV=2	P	GO:0030335	positive regulation of cell migration
P43121	MUC18_HUMANCell surface glyco MUC18 OS=Homo sapiens OX=9606 GN=MCAM PE=1 SV=2	P	GO:0031175	neuron projection development
P43121	MUC18_HUMANCell surface glyco MUC18 OS=Homo sapiens OX=9606 GN=MCAM PE=1 SV=2	P	GO:0031326	regulation of cellular biosynthetic process
P43121	MUC18_HUMANCell surface glyco MUC18 OS=Homo sapiens OX=9606 GN=MCAM PE=1 SV=2	P	GO:0032872	regulation of stress-activated MAPK cascade
P43121	MUC18_HUMANCell surface glyco MUC18 OS=Homo sapiens OX=9606 GN=MCAM PE=1 SV=2	P	GO:0042221	response to chemical
P43121	MUC18_HUMANCell surface glyco MUC18 OS=Homo sapiens OX=9606 GN=MCAM PE=1 SV=2	P	GO:0043410	positive regulation of MAPK cascade
P43121	MUC18_HUMANCell surface glyco MUC18 OS=Homo sapiens OX=9606 GN=MCAM PE=1 SV=2	P	GO:0048167	regulation of synaptic plasticity
P43121	MUC18_HUMANCell surface glyco MUC18 OS=Homo sapiens OX=9606 GN=MCAM PE=1 SV=2	P	GO:0051241	negative regulation of multicellular organismal process
P43121	MUC18_HUMANCell surface glyco MUC18 OS=Homo sapiens OX=9606 GN=MCAM PE=1 SV=2	P	GO:0061042	vascular wound healing
P43121	MUC18_HUMANCell surface glyco MUC18 OS=Homo sapiens OX=9606 GN=MCAM PE=1 SV=2	P	GO:0065009	regulation of molecular function
P52823	STC1_HUMANStanniocalcin-1 OS=Homo sapiens OX=9606 GN=STC1 PE=1 SV=1	C	GO:0005615	extracellular space
P52823	STC1_HUMANStanniocalcin-1 OS=Homo sapiens OX=9606 GN=STC1 PE=1 SV=1	C	GO:0005634	nucleus
P52823	STC1_HUMANStanniocalcin-1 OS=Homo sapiens OX=9606 GN=STC1 PE=1 SV=1	C	GO:0005737	cytoplasm
P52823	STC1_HUMANStanniocalcin-1 OS=Homo sapiens OX=9606 GN=STC1 PE=1 SV=1	C	GO:0016324	apical plasma membrane
P52823	STC1_HUMANStanniocalcin-1 OS=Homo sapiens OX=9606 GN=STC1 PE=1 SV=1	F	GO:0005179	hormone activity
P52823	STC1_HUMANStanniocalcin-1 OS=Homo sapiens OX=9606 GN=STC1 PE=1 SV=1	F	GO:0019899	enzyme binding
P52823	STC1_HUMANStanniocalcin-1 OS=Homo sapiens OX=9606 GN=STC1 PE=1 SV=1	F	GO:0042803	protein homodimerization activity
P52823	STC1_HUMANStanniocalcin-1 OS=Homo sapiens OX=9606 GN=STC1 PE=1 SV=1	P	GO:0001503	ossification
P52823	STC1_HUMANStanniocalcin-1 OS=Homo sapiens OX=9606 GN=STC1 PE=1 SV=1	P	GO:0001886	endothelial cell morphogenesis
P52823	STC1_HUMANStanniocalcin-1 OS=Homo sapiens OX=9606 GN=STC1 PE=1 SV=1	P	GO:0003421	growth plate cartilage axis specification
P52823	STC1_HUMANStanniocalcin-1 OS=Homo sapiens OX=9606 GN=STC1 PE=1 SV=1	P	GO:0006874	cellular calcium ion homeostasis
P52823	STC1_HUMANStanniocalcin-1 OS=Homo sapiens OX=9606 GN=STC1 PE=1 SV=1	P	GO:0007165	signal transduction
P52823	STC1_HUMANStanniocalcin-1 OS=Homo sapiens OX=9606 GN=STC1 PE=1 SV=1	P	GO:0007566	embryo implantation
P52823	STC1_HUMANStanniocalcin-1 OS=Homo sapiens OX=9606 GN=STC1 PE=1 SV=1	P	GO:0010596	negative regulation of endothelial cell migration
P52823	STC1_HUMANStanniocalcin-1 OS=Homo sapiens OX=9606 GN=STC1 PE=1 SV=1	P	GO:0010629	negative regulation of gene expression
P52823	STC1_HUMANStanniocalcin-1 OS=Homo sapiens OX=9606 GN=STC1 PE=1 SV=1	P	GO:0033280	response to vitamin D
P52823	STC1_HUMANStanniocalcin-1 OS=Homo sapiens OX=9606 GN=STC1 PE=1 SV=1	P	GO:0035988	chondrocyte proliferation
P52823	STC1_HUMANStanniocalcin-1 OS=Homo sapiens OX=9606 GN=STC1 PE=1 SV=1	P	GO:0044070	regulation of anion transport
P52823	STC1_HUMANStanniocalcin-1 OS=Homo sapiens OX=9606 GN=STC1 PE=1 SV=1	P	GO:0046697	decidualization
P52823	STC1_HUMANStanniocalcin-1 OS=Homo sapiens OX=9606 GN=STC1 PE=1 SV=1	P	GO:0051926	negative regulation of calcium ion transport
P52823	STC1_HUMANStanniocalcin-1 OS=Homo sapiens OX=9606 GN=STC1 PE=1 SV=1	P	GO:0071320	cellular response to cAMP
P52823	STC1_HUMANStanniocalcin-1 OS=Homo sapiens OX=9606 GN=STC1 PE=1 SV=1	P	GO:0071385	cellular response to glucocorticoid stimulus
P52823	STC1_HUMANStanniocalcin-1 OS=Homo sapiens OX=9606 GN=STC1 PE=1 SV=1	P	GO:0071456	cellular response to hypoxia
P52823	STC1_HUMANStanniocalcin-1 OS=Homo sapiens OX=9606 GN=STC1 PE=1 SV=1	P	GO:0086004	regulation of cardiac muscle cell contraction
P52823	STC1_HUMANStanniocalcin-1 OS=Homo sapiens OX=9606 GN=STC1 PE=1 SV=1	P	GO:0090280	positive regulation of calcium ion import
P52823	STC1_HUMANStanniocalcin-1 OS=Homo sapiens OX=9606 GN=STC1 PE=1 SV=1	P	GO:1903403	negative regulation of renal phosphate excretion
O95833	CLIC3_HUMANChloride intracellular channel 3 OS=Homo sapiens OX=9606 GN=CLIC3 PE=1 SV=2	C	GO:0005739	mitochondrion
O95833	CLIC3_HUMANChloride intracellular channel 3 OS=Homo sapiens OX=9606 GN=CLIC3 PE=1 SV=2	C	GO:0005794	Golgi apparatus
O95833	CLIC3_HUMANChloride intracellular channel 3 OS=Homo sapiens OX=9606 GN=CLIC3 PE=1 SV=2	C	GO:0005813	centrosome
O95833	CLIC3_HUMANChloride intracellular channel 3 OS=Homo sapiens OX=9606 GN=CLIC3 PE=1 SV=2	C	GO:0005829	cytosol
O95833	CLIC3_HUMANChloride intracellular channel 3 OS=Homo sapiens OX=9606 GN=CLIC3 PE=1 SV=2	C	GO:0005886	plasma membrane
O95833	CLIC3_HUMANChloride intracellular channel 3 OS=Homo sapiens OX=9606 GN=CLIC3 PE=1 SV=2	C	GO:0009986	cell surface
O95833	CLIC3_HUMANChloride intracellular channel 3 OS=Homo sapiens OX=9606 GN=CLIC3 PE=1 SV=2	C	GO:0015629	actin cytoskeleton
O95833	CLIC3_HUMANChloride intracellular channel 3 OS=Homo sapiens OX=9606 GN=CLIC3 PE=1 SV=2	C	GO:0016363	nuclear matrix
O95833	CLIC3_HUMANChloride intracellular channel 3 OS=Homo sapiens OX=9606 GN=CLIC3 PE=1 SV=2	C	GO:0016604	nuclear body
O95833	CLIC3_HUMANChloride intracellular channel 3 OS=Homo sapiens OX=9606 GN=CLIC3 PE=1 SV=2	C	GO:0030496	midbody
O95833	CLIC3_HUMANChloride intracellular channel 3 OS=Homo sapiens OX=9606 GN=CLIC3 PE=1 SV=2	C	GO:0034707	chloride channel complex
O95833	CLIC3_HUMANChloride intracellular channel 3 OS=Homo sapiens OX=9606 GN=CLIC3 PE=1 SV=2	C	GO:0045177	apical part of cell
O95833	CLIC3_HUMANChloride intracellular channel 3 OS=Homo sapiens OX=9606 GN=CLIC3 PE=1 SV=2	F	GO:0004364	glutathione transferase activity
O95833	CLIC3_HUMANChloride intracellular channel 3 OS=Homo sapiens OX=9606 GN=CLIC3 PE=1 SV=2	F	GO:0004602	glutathione peroxidase activity
O95833	CLIC3_HUMANChloride intracellular channel 3 OS=Homo sapiens OX=9606 GN=CLIC3 PE=1 SV=2	F	GO:0005244	voltage-gated ion channel activity
O95833	CLIC3_HUMANChloride intracellular channel 3 OS=Homo sapiens OX=9606 GN=CLIC3 PE=1 SV=2	F	GO:0005254	chloride channel activity
O95833	CLIC3_HUMANChloride intracellular channel 3 OS=Homo sapiens OX=9606 GN=CLIC3 PE=1 SV=2	F	GO:0050780	dopamine receptor binding
O95833	CLIC3_HUMANChloride intracellular channel 3 OS=Homo sapiens OX=9606 GN=CLIC3 PE=1 SV=2	P	GO:0007605	sensory perception of sound
O95833	CLIC3_HUMANChloride intracellular channel 3 OS=Homo sapiens OX=9606 GN=CLIC3 PE=1 SV=2	P	GO:0010881	regulation of cardiac muscle contraction by regulation of the release of sequestered calcium ion
O95833	CLIC3_HUMANChloride intracellular channel 3 OS=Homo sapiens OX=9606 GN=CLIC3 PE=1 SV=2	P	GO:0030216	keratinocyte differentiation
O95833	CLIC3_HUMANChloride intracellular channel 3 OS=Homo sapiens OX=9606 GN=CLIC3 PE=1 SV=2	P	GO:0030336	negative regulation of cell migration
O95833	CLIC3_HUMANChloride intracellular channel 3 OS=Homo sapiens OX=9606 GN=CLIC3 PE=1 SV=2	P	GO:0051099	positive regulation of binding
O95833	CLIC3_HUMANChloride intracellular channel 3 OS=Homo sapiens OX=9606 GN=CLIC3 PE=1 SV=2	P	GO:0060315	negative regulation of ryanodine-sensitive calcium-release channel activity
O95833	CLIC3_HUMANChloride intracellular channel 3 OS=Homo sapiens OX=9606 GN=CLIC3 PE=1 SV=2	P	GO:1902476	chloride transmembrane transport
O95833	CLIC3_HUMANChloride intracellular channel 3 OS=Homo sapiens OX=9606 GN=CLIC3 PE=1 SV=2	P	GO:0006749	glutathione metabolic process
O95833	CLIC3_HUMANChloride intracellular channel 3 OS=Homo sapiens OX=9606 GN=CLIC3 PE=1 SV=2	P	GO:0006803	obsolete glutathione conjugation reaction
O95833	CLIC3_HUMANChloride intracellular channel 3 OS=Homo sapiens OX=9606 GN=CLIC3 PE=1 SV=2	P	GO:0006804	obsolete peroxidase reaction
O95833	CLIC3_HUMANChloride intracellular channel 3 OS=Homo sapiens OX=9606 GN=CLIC3 PE=1 SV=2	P	GO:0006979	response to oxidative stress
Q9NUD5	ZCHC3_HUMANZinc finger CCHC domain-containing 3 OS=Homo sapiens OX=9606 GN=ZCCHC3 PE=1 SV=2	C	GO:0005737	cytoplasm
Q9NUD5	ZCHC3_HUMANZinc finger CCHC domain-containing 3 OS=Homo sapiens OX=9606 GN=ZCCHC3 PE=1 SV=2	F	GO:0003690	double-stranded DNA binding
Q9NUD5	ZCHC3_HUMANZinc finger CCHC domain-containing 3 OS=Homo sapiens OX=9606 GN=ZCCHC3 PE=1 SV=2	F	GO:0003723	RNA binding
Q9NUD5	ZCHC3_HUMANZinc finger CCHC domain-containing 3 OS=Homo sapiens OX=9606 GN=ZCCHC3 PE=1 SV=2	F	GO:0008270	zinc ion binding
Q9NUD5	ZCHC3_HUMANZinc finger CCHC domain-containing 3 OS=Homo sapiens OX=9606 GN=ZCCHC3 PE=1 SV=2	P	GO:0032481	positive regulation of type I interferon production
Q9NUD5	ZCHC3_HUMANZinc finger CCHC domain-containing 3 OS=Homo sapiens OX=9606 GN=ZCCHC3 PE=1 SV=2	P	GO:0071360	cellular response to exogenous dsRNA
Q9NUD5	ZCHC3_HUMANZinc finger CCHC domain-containing 3 OS=Homo sapiens OX=9606 GN=ZCCHC3 PE=1 SV=2	P	GO:1900246	positive regulation of RIG-I signaling pathway
O95873	CF047_HUMANUncharacterized protein C6orf47 OS=Homo sapiens OX=9606 GN=C6orf47 PE=1 SV=2	C	GO:0005829	cytosol
Q13751	LAMB3_HUMANLaminin subunit beta-3 OS=Homo sapiens OX=9606 GN=LAMB3 PE=1 SV=1	C	GO:0005608	laminin-3 complex
Q13751	LAMB3_HUMANLaminin subunit beta-3 OS=Homo sapiens OX=9606 GN=LAMB3 PE=1 SV=1	C	GO:0005610	laminin-5 complex
Q13751	LAMB3_HUMANLaminin subunit beta-3 OS=Homo sapiens OX=9606 GN=LAMB3 PE=1 SV=1	C	GO:0032421	stereocilium bundle
Q13751	LAMB3_HUMANLaminin subunit beta-3 OS=Homo sapiens OX=9606 GN=LAMB3 PE=1 SV=1	C	GO:0043226	organelle
Q13751	LAMB3_HUMANLaminin subunit beta-3 OS=Homo sapiens OX=9606 GN=LAMB3 PE=1 SV=1	C	GO:0044424	intracellular part
Q13751	LAMB3_HUMANLaminin subunit beta-3 OS=Homo sapiens OX=9606 GN=LAMB3 PE=1 SV=1	C	GO:0045202	synapse
Q13751	LAMB3_HUMANLaminin subunit beta-3 OS=Homo sapiens OX=9606 GN=LAMB3 PE=1 SV=1	C	GO:0120038	plasma membrane bounded cell projection part
Q13751	LAMB3_HUMANLaminin subunit beta-3 OS=Homo sapiens OX=9606 GN=LAMB3 PE=1 SV=1	F	GO:0005178	integrin binding
Q13751	LAMB3_HUMANLaminin subunit beta-3 OS=Homo sapiens OX=9606 GN=LAMB3 PE=1 SV=1	F	GO:0005201	extracellular matrix structural constituent
Q13751	LAMB3_HUMANLaminin subunit beta-3 OS=Homo sapiens OX=9606 GN=LAMB3 PE=1 SV=1	P	GO:0008544	epidermis development
Q13751	LAMB3_HUMANLaminin subunit beta-3 OS=Homo sapiens OX=9606 GN=LAMB3 PE=1 SV=1	P	GO:0009887	animal organ morphogenesis
Q13751	LAMB3_HUMANLaminin subunit beta-3 OS=Homo sapiens OX=9606 GN=LAMB3 PE=1 SV=1	P	GO:0030335	positive regulation of cell migration
Q13751	LAMB3_HUMANLaminin subunit beta-3 OS=Homo sapiens OX=9606 GN=LAMB3 PE=1 SV=1	P	GO:0031175	neuron projection development
Q13751	LAMB3_HUMANLaminin subunit beta-3 OS=Homo sapiens OX=9606 GN=LAMB3 PE=1 SV=1	P	GO:0031581	hemidesmosome assembly
Q13751	LAMB3_HUMANLaminin subunit beta-3 OS=Homo sapiens OX=9606 GN=LAMB3 PE=1 SV=1	P	GO:0034446	substrate adhesion-dependent cell spreading
Q13751	LAMB3_HUMANLaminin subunit beta-3 OS=Homo sapiens OX=9606 GN=LAMB3 PE=1 SV=1	P	GO:0035987	endodermal cell differentiation
Q13751	LAMB3_HUMANLaminin subunit beta-3 OS=Homo sapiens OX=9606 GN=LAMB3 PE=1 SV=1	P	GO:0050793	regulation of developmental process
Q13751	LAMB3_HUMANLaminin subunit beta-3 OS=Homo sapiens OX=9606 GN=LAMB3 PE=1 SV=1	P	GO:0050873	brown fat cell differentiation
Q13751	LAMB3_HUMANLaminin subunit beta-3 OS=Homo sapiens OX=9606 GN=LAMB3 PE=1 SV=1	P	GO:0050953	sensory perception of light stimulus
Q13751	LAMB3_HUMANLaminin subunit beta-3 OS=Homo sapiens OX=9606 GN=LAMB3 PE=1 SV=1	P	GO:0060429	epithelium development
Q13751	LAMB3_HUMANLaminin subunit beta-3 OS=Homo sapiens OX=9606 GN=LAMB3 PE=1 SV=1	P	GO:0070831	basement membrane assembly
Q13751	LAMB3_HUMANLaminin subunit beta-3 OS=Homo sapiens OX=9606 GN=LAMB3 PE=1 SV=1	P	GO:0007165	signal transduction
Q13751	LAMB3_HUMANLaminin subunit beta-3 OS=Homo sapiens OX=9606 GN=LAMB3 PE=1 SV=1	C	GO:0008305	integrin complex
Q7Z7K0	COXM1_HUMANCOX assembly mitochondrial homolog OS=Homo sapiens OX=9606 GN=CMC1 PE=1 SV=1	C	GO:0005739	mitochondrion
Q7Z7K0	COXM1_HUMANCOX assembly mitochondrial homolog OS=Homo sapiens OX=9606 GN=CMC1 PE=1 SV=1	F	GO:0046872	metal ion binding
Q9BWH2	FUND2_HUMANFUN14 domain-containing 2 OS=Homo sapiens OX=9606 GN=FUNDC2 PE=1 SV=2	C	GO:0031307	integral component of mitochondrial outer membrane
Q9BWH2	FUND2_HUMANFUN14 domain-containing 2 OS=Homo sapiens OX=9606 GN=FUNDC2 PE=1 SV=2	F	GO:0005515	protein binding
Q9BWH2	FUND2_HUMANFUN14 domain-containing 2 OS=Homo sapiens OX=9606 GN=FUNDC2 PE=1 SV=2	P	GO:0000422	autophagy of mitochondrion
Q9BWH2	FUND2_HUMANFUN14 domain-containing 2 OS=Homo sapiens OX=9606 GN=FUNDC2 PE=1 SV=2	P	GO:0001666	response to hypoxia
Q9BWH2	FUND2_HUMANFUN14 domain-containing 2 OS=Homo sapiens OX=9606 GN=FUNDC2 PE=1 SV=2	P	GO:0010243	response to organonitrogen compound
Q9BWH2	FUND2_HUMANFUN14 domain-containing 2 OS=Homo sapiens OX=9606 GN=FUNDC2 PE=1 SV=2	P	GO:0016236	macroautophagy
P05362	ICAM1_HUMANIntercellular adhesion molecule 1 OS=Homo sapiens OX=9606 GN=ICAM1 PE=1 SV=2	C	GO:0009986	cell surface
P05362	ICAM1_HUMANIntercellular adhesion molecule 1 OS=Homo sapiens OX=9606 GN=ICAM1 PE=1 SV=2	C	GO:0045121	membrane raft
P05362	ICAM1_HUMANIntercellular adhesion molecule 1 OS=Homo sapiens OX=9606 GN=ICAM1 PE=1 SV=2	C	GO:0070062	extracellular exosome
P05362	ICAM1_HUMANIntercellular adhesion molecule 1 OS=Homo sapiens OX=9606 GN=ICAM1 PE=1 SV=2	F	GO:0004888	transmembrane signaling receptor activity
P05362	ICAM1_HUMANIntercellular adhesion molecule 1 OS=Homo sapiens OX=9606 GN=ICAM1 PE=1 SV=2	F	GO:0005178	integrin binding
P05362	ICAM1_HUMANIntercellular adhesion molecule 1 OS=Homo sapiens OX=9606 GN=ICAM1 PE=1 SV=2	P	GO:0001666	response to hypoxia
P05362	ICAM1_HUMANIntercellular adhesion molecule 1 OS=Homo sapiens OX=9606 GN=ICAM1 PE=1 SV=2	P	GO:0001910	regulation of leukocyte mediated cytotoxicity
P05362	ICAM1_HUMANIntercellular adhesion molecule 1 OS=Homo sapiens OX=9606 GN=ICAM1 PE=1 SV=2	P	GO:0002223	stimulatory C-type lectin receptor signaling pathway
P05362	ICAM1_HUMANIntercellular adhesion molecule 1 OS=Homo sapiens OX=9606 GN=ICAM1 PE=1 SV=2	P	GO:0002438	acute inflammatory response to antigenic stimulus
P05362	ICAM1_HUMANIntercellular adhesion molecule 1 OS=Homo sapiens OX=9606 GN=ICAM1 PE=1 SV=2	P	GO:0002693	positive regulation of cellular extravasation
P05362	ICAM1_HUMANIntercellular adhesion molecule 1 OS=Homo sapiens OX=9606 GN=ICAM1 PE=1 SV=2	P	GO:0007569	cell aging
P05362	ICAM1_HUMANIntercellular adhesion molecule 1 OS=Homo sapiens OX=9606 GN=ICAM1 PE=1 SV=2	P	GO:0007605	sensory perception of sound
P05362	ICAM1_HUMANIntercellular adhesion molecule 1 OS=Homo sapiens OX=9606 GN=ICAM1 PE=1 SV=2	P	GO:0010477	response to sulfur dioxide
P05362	ICAM1_HUMANIntercellular adhesion molecule 1 OS=Homo sapiens OX=9606 GN=ICAM1 PE=1 SV=2	P	GO:0022614	membrane to membrane docking
P05362	ICAM1_HUMANIntercellular adhesion molecule 1 OS=Homo sapiens OX=9606 GN=ICAM1 PE=1 SV=2	P	GO:0030198	extracellular matrix organization
P05362	ICAM1_HUMANIntercellular adhesion molecule 1 OS=Homo sapiens OX=9606 GN=ICAM1 PE=1 SV=2	P	GO:0032868	response to insulin
P05362	ICAM1_HUMANIntercellular adhesion molecule 1 OS=Homo sapiens OX=9606 GN=ICAM1 PE=1 SV=2	P	GO:0034698	response to gonadotropin
P05362	ICAM1_HUMANIntercellular adhesion molecule 1 OS=Homo sapiens OX=9606 GN=ICAM1 PE=1 SV=2	P	GO:0043547	positive regulation of GTPase activity
P05362	ICAM1_HUMANIntercellular adhesion molecule 1 OS=Homo sapiens OX=9606 GN=ICAM1 PE=1 SV=2	P	GO:0045429	positive regulation of nitric oxide biosynthetic process
P05362	ICAM1_HUMANIntercellular adhesion molecule 1 OS=Homo sapiens OX=9606 GN=ICAM1 PE=1 SV=2	P	GO:0045471	response to ethanol
P05362	ICAM1_HUMANIntercellular adhesion molecule 1 OS=Homo sapiens OX=9606 GN=ICAM1 PE=1 SV=2	P	GO:0045907	positive regulation of vasoconstriction
P05362	ICAM1_HUMANIntercellular adhesion molecule 1 OS=Homo sapiens OX=9606 GN=ICAM1 PE=1 SV=2	P	GO:0046718	viral entry into host cell
P05362	ICAM1_HUMANIntercellular adhesion molecule 1 OS=Homo sapiens OX=9606 GN=ICAM1 PE=1 SV=2	P	GO:0046813	receptor-mediated virion attachment to host cell
P05362	ICAM1_HUMANIntercellular adhesion molecule 1 OS=Homo sapiens OX=9606 GN=ICAM1 PE=1 SV=2	P	GO:0050731	positive regulation of peptidyl-tyrosine phosphorylation
P05362	ICAM1_HUMANIntercellular adhesion molecule 1 OS=Homo sapiens OX=9606 GN=ICAM1 PE=1 SV=2	P	GO:0051926	negative regulation of calcium ion transport
P05362	ICAM1_HUMANIntercellular adhesion molecule 1 OS=Homo sapiens OX=9606 GN=ICAM1 PE=1 SV=2	P	GO:0060333	interferon-gamma-mediated signaling pathway
P05362	ICAM1_HUMANIntercellular adhesion molecule 1 OS=Homo sapiens OX=9606 GN=ICAM1 PE=1 SV=2	P	GO:0070374	positive regulation of ERK1 and ERK2 cascade
P05362	ICAM1_HUMANIntercellular adhesion molecule 1 OS=Homo sapiens OX=9606 GN=ICAM1 PE=1 SV=2	P	GO:0071222	cellular response to lipopolysaccharide
P05362	ICAM1_HUMANIntercellular adhesion molecule 1 OS=Homo sapiens OX=9606 GN=ICAM1 PE=1 SV=2	P	GO:0071312	cellular response to alkaloid
P05362	ICAM1_HUMANIntercellular adhesion molecule 1 OS=Homo sapiens OX=9606 GN=ICAM1 PE=1 SV=2	P	GO:0071333	cellular response to glucose stimulus
P05362	ICAM1_HUMANIntercellular adhesion molecule 1 OS=Homo sapiens OX=9606 GN=ICAM1 PE=1 SV=2	P	GO:0071347	cellular response to interleukin-1
P05362	ICAM1_HUMANIntercellular adhesion molecule 1 OS=Homo sapiens OX=9606 GN=ICAM1 PE=1 SV=2	P	GO:0071354	cellular response to interleukin-6
P05362	ICAM1_HUMANIntercellular adhesion molecule 1 OS=Homo sapiens OX=9606 GN=ICAM1 PE=1 SV=2	P	GO:0071356	cellular response to tumor necrosis factor
P05362	ICAM1_HUMANIntercellular adhesion molecule 1 OS=Homo sapiens OX=9606 GN=ICAM1 PE=1 SV=2	P	GO:0071549	cellular response to dexamethasone stimulus
P05362	ICAM1_HUMANIntercellular adhesion molecule 1 OS=Homo sapiens OX=9606 GN=ICAM1 PE=1 SV=2	P	GO:0072683	T cell extravasation
P05362	ICAM1_HUMANIntercellular adhesion molecule 1 OS=Homo sapiens OX=9606 GN=ICAM1 PE=1 SV=2	P	GO:0090557	establishment of endothelial intestinal barrier
P05362	ICAM1_HUMANIntercellular adhesion molecule 1 OS=Homo sapiens OX=9606 GN=ICAM1 PE=1 SV=2	P	GO:0097368	establishment of Sertoli cell barrier
P05362	ICAM1_HUMANIntercellular adhesion molecule 1 OS=Homo sapiens OX=9606 GN=ICAM1 PE=1 SV=2	P	GO:1900027	regulation of ruffle assembly
P05362	ICAM1_HUMANIntercellular adhesion molecule 1 OS=Homo sapiens OX=9606 GN=ICAM1 PE=1 SV=2	P	GO:1904646	cellular response to amyloid-beta
P05362	ICAM1_HUMANIntercellular adhesion molecule 1 OS=Homo sapiens OX=9606 GN=ICAM1 PE=1 SV=2	P	GO:1904996	positive regulation of leukocyte adhesion to vascular endothelial cell
P05362	ICAM1_HUMANIntercellular adhesion molecule 1 OS=Homo sapiens OX=9606 GN=ICAM1 PE=1 SV=2	P	GO:1990830	cellular response to leukemia inhibitory factor
P05362	ICAM1_HUMANIntercellular adhesion molecule 1 OS=Homo sapiens OX=9606 GN=ICAM1 PE=1 SV=2	C	GO:0008305	integrin complex
Q92805	GOGA1_HUMANGolgin subfamily A member 1 OS=Homo sapiens OX=9606 GN=GOLGA1 PE=1 SV=3	C	GO:0000139	Golgi membrane
Q92805	GOGA1_HUMANGolgin subfamily A member 1 OS=Homo sapiens OX=9606 GN=GOLGA1 PE=1 SV=3	C	GO:0001669	acrosomal vesicle
Q92805	GOGA1_HUMANGolgin subfamily A member 1 OS=Homo sapiens OX=9606 GN=GOLGA1 PE=1 SV=3	C	GO:0005802	trans-Golgi network
Q92805	GOGA1_HUMANGolgin subfamily A member 1 OS=Homo sapiens OX=9606 GN=GOLGA1 PE=1 SV=3	C	GO:0005829	cytosol
Q92805	GOGA1_HUMANGolgin subfamily A member 1 OS=Homo sapiens OX=9606 GN=GOLGA1 PE=1 SV=3	C	GO:0048471	perinuclear region of cytoplasm
Q92805	GOGA1_HUMANGolgin subfamily A member 1 OS=Homo sapiens OX=9606 GN=GOLGA1 PE=1 SV=3	F	GO:0005515	protein binding
P08183	MDR1_HUMANATP-dependent translocase ABCB1 OS=Homo sapiens OX=9606 GN=ABCB1 PE=1 SV=3	C	GO:0005654	nucleoplasm
P08183	MDR1_HUMANATP-dependent translocase ABCB1 OS=Homo sapiens OX=9606 GN=ABCB1 PE=1 SV=3	C	GO:0005730	nucleolus
P08183	MDR1_HUMANATP-dependent translocase ABCB1 OS=Homo sapiens OX=9606 GN=ABCB1 PE=1 SV=3	C	GO:0005741	mitochondrial outer membrane
P08183	MDR1_HUMANATP-dependent translocase ABCB1 OS=Homo sapiens OX=9606 GN=ABCB1 PE=1 SV=3	C	GO:0005764	lysosome
P08183	MDR1_HUMANATP-dependent translocase ABCB1 OS=Homo sapiens OX=9606 GN=ABCB1 PE=1 SV=3	C	GO:0005829	cytosol
P08183	MDR1_HUMANATP-dependent translocase ABCB1 OS=Homo sapiens OX=9606 GN=ABCB1 PE=1 SV=3	C	GO:0005887	integral component of plasma membrane
P08183	MDR1_HUMANATP-dependent translocase ABCB1 OS=Homo sapiens OX=9606 GN=ABCB1 PE=1 SV=3	C	GO:0005925	focal adhesion
P08183	MDR1_HUMANATP-dependent translocase ABCB1 OS=Homo sapiens OX=9606 GN=ABCB1 PE=1 SV=3	C	GO:0009986	cell surface
P08183	MDR1_HUMANATP-dependent translocase ABCB1 OS=Homo sapiens OX=9606 GN=ABCB1 PE=1 SV=3	C	GO:0015629	actin cytoskeleton
P08183	MDR1_HUMANATP-dependent translocase ABCB1 OS=Homo sapiens OX=9606 GN=ABCB1 PE=1 SV=3	C	GO:0016324	apical plasma membrane
P08183	MDR1_HUMANATP-dependent translocase ABCB1 OS=Homo sapiens OX=9606 GN=ABCB1 PE=1 SV=3	C	GO:0030136	clathrin-coated vesicle
P08183	MDR1_HUMANATP-dependent translocase ABCB1 OS=Homo sapiens OX=9606 GN=ABCB1 PE=1 SV=3	C	GO:0032592	integral component of mitochondrial membrane
P08183	MDR1_HUMANATP-dependent translocase ABCB1 OS=Homo sapiens OX=9606 GN=ABCB1 PE=1 SV=3	C	GO:0042825	TAP complex
P08183	MDR1_HUMANATP-dependent translocase ABCB1 OS=Homo sapiens OX=9606 GN=ABCB1 PE=1 SV=3	C	GO:0045121	membrane raft
P08183	MDR1_HUMANATP-dependent translocase ABCB1 OS=Homo sapiens OX=9606 GN=ABCB1 PE=1 SV=3	F	GO:0005524	ATP binding
P08183	MDR1_HUMANATP-dependent translocase ABCB1 OS=Homo sapiens OX=9606 GN=ABCB1 PE=1 SV=3	F	GO:0008559	ATPase-coupled xenobiotic transmembrane transporter activity
P08183	MDR1_HUMANATP-dependent translocase ABCB1 OS=Homo sapiens OX=9606 GN=ABCB1 PE=1 SV=3	F	GO:0015433	ATPase-coupled peptide antigen transmembrane transporter activity
P08183	MDR1_HUMANATP-dependent translocase ABCB1 OS=Homo sapiens OX=9606 GN=ABCB1 PE=1 SV=3	F	GO:0015562	efflux transmembrane transporter activity
P08183	MDR1_HUMANATP-dependent translocase ABCB1 OS=Homo sapiens OX=9606 GN=ABCB1 PE=1 SV=3	F	GO:0016887	ATPase activity
P08183	MDR1_HUMANATP-dependent translocase ABCB1 OS=Homo sapiens OX=9606 GN=ABCB1 PE=1 SV=3	F	GO:0042287	MHC protein binding
P08183	MDR1_HUMANATP-dependent translocase ABCB1 OS=Homo sapiens OX=9606 GN=ABCB1 PE=1 SV=3	F	GO:0046978	TAP1 binding
P08183	MDR1_HUMANATP-dependent translocase ABCB1 OS=Homo sapiens OX=9606 GN=ABCB1 PE=1 SV=3	F	GO:0090554	phosphatidylcholine floppase activity
P08183	MDR1_HUMANATP-dependent translocase ABCB1 OS=Homo sapiens OX=9606 GN=ABCB1 PE=1 SV=3	F	GO:0090555	phosphatidylethanolamine flippase activity
P08183	MDR1_HUMANATP-dependent translocase ABCB1 OS=Homo sapiens OX=9606 GN=ABCB1 PE=1 SV=3	F	GO:0099038	ceramide floppase activity
P08183	MDR1_HUMANATP-dependent translocase ABCB1 OS=Homo sapiens OX=9606 GN=ABCB1 PE=1 SV=3	P	GO:0000086	G2/M transition of mitotic cell cycle
P08183	MDR1_HUMANATP-dependent translocase ABCB1 OS=Homo sapiens OX=9606 GN=ABCB1 PE=1 SV=3	P	GO:0002489	antigen processing and presentation of endogenous peptide antigen via MHC class Ib via ER pathway, TAP-dependent
P08183	MDR1_HUMANATP-dependent translocase ABCB1 OS=Homo sapiens OX=9606 GN=ABCB1 PE=1 SV=3	P	GO:0019216	regulation of lipid metabolic process
P08183	MDR1_HUMANATP-dependent translocase ABCB1 OS=Homo sapiens OX=9606 GN=ABCB1 PE=1 SV=3	P	GO:0019885	antigen processing and presentation of endogenous peptide antigen via MHC class I
P08183	MDR1_HUMANATP-dependent translocase ABCB1 OS=Homo sapiens OX=9606 GN=ABCB1 PE=1 SV=3	P	GO:0032376	positive regulation of cholesterol transport
P08183	MDR1_HUMANATP-dependent translocase ABCB1 OS=Homo sapiens OX=9606 GN=ABCB1 PE=1 SV=3	P	GO:0042391	regulation of membrane potential
P08183	MDR1_HUMANATP-dependent translocase ABCB1 OS=Homo sapiens OX=9606 GN=ABCB1 PE=1 SV=3	P	GO:0045332	phospholipid translocation
P08183	MDR1_HUMANATP-dependent translocase ABCB1 OS=Homo sapiens OX=9606 GN=ABCB1 PE=1 SV=3	P	GO:0046967	cytosol to endoplasmic reticulum transport
P08183	MDR1_HUMANATP-dependent translocase ABCB1 OS=Homo sapiens OX=9606 GN=ABCB1 PE=1 SV=3	P	GO:0046968	peptide antigen transport
P08183	MDR1_HUMANATP-dependent translocase ABCB1 OS=Homo sapiens OX=9606 GN=ABCB1 PE=1 SV=3	P	GO:0047484	regulation of response to osmotic stress
P08183	MDR1_HUMANATP-dependent translocase ABCB1 OS=Homo sapiens OX=9606 GN=ABCB1 PE=1 SV=3	P	GO:0048058	compound eye corneal lens development
P08183	MDR1_HUMANATP-dependent translocase ABCB1 OS=Homo sapiens OX=9606 GN=ABCB1 PE=1 SV=3	P	GO:0072089	stem cell proliferation
P08183	MDR1_HUMANATP-dependent translocase ABCB1 OS=Homo sapiens OX=9606 GN=ABCB1 PE=1 SV=3	P	GO:0099040	ceramide translocation
P08183	MDR1_HUMANATP-dependent translocase ABCB1 OS=Homo sapiens OX=9606 GN=ABCB1 PE=1 SV=3	P	GO:1901529	positive regulation of anion channel activity
P08183	MDR1_HUMANATP-dependent translocase ABCB1 OS=Homo sapiens OX=9606 GN=ABCB1 PE=1 SV=3	P	GO:1901557	response to fenofibrate
P08183	MDR1_HUMANATP-dependent translocase ABCB1 OS=Homo sapiens OX=9606 GN=ABCB1 PE=1 SV=3	P	GO:2001140	positive regulation of phospholipid transport
P08183	MDR1_HUMANATP-dependent translocase ABCB1 OS=Homo sapiens OX=9606 GN=ABCB1 PE=1 SV=3	P	GO:2001225	regulation of chloride transport
P08183	MDR1_HUMANATP-dependent translocase ABCB1 OS=Homo sapiens OX=9606 GN=ABCB1 PE=1 SV=3	P	GO:0006855	drug transmembrane transport
P08183	MDR1_HUMANATP-dependent translocase ABCB1 OS=Homo sapiens OX=9606 GN=ABCB1 PE=1 SV=3	P	GO:0007165	signal transduction
P08183	MDR1_HUMANATP-dependent translocase ABCB1 OS=Homo sapiens OX=9606 GN=ABCB1 PE=1 SV=3	C	GO:0042611	MHC protein complex
Q16610	ECM1_HUMANExtracellular matrix 1 OS=Homo sapiens OX=9606 GN=ECM1 PE=1 SV=2	C	GO:0005615	extracellular space
Q16610	ECM1_HUMANExtracellular matrix 1 OS=Homo sapiens OX=9606 GN=ECM1 PE=1 SV=2	C	GO:0062023	collagen-containing extracellular matrix
Q16610	ECM1_HUMANExtracellular matrix 1 OS=Homo sapiens OX=9606 GN=ECM1 PE=1 SV=2	F	GO:0005134	interleukin-2 receptor binding
Q16610	ECM1_HUMANExtracellular matrix 1 OS=Homo sapiens OX=9606 GN=ECM1 PE=1 SV=2	F	GO:0005201	extracellular matrix structural constituent
Q16610	ECM1_HUMANExtracellular matrix 1 OS=Homo sapiens OX=9606 GN=ECM1 PE=1 SV=2	F	GO:0008022	protein C-terminus binding
Q16610	ECM1_HUMANExtracellular matrix 1 OS=Homo sapiens OX=9606 GN=ECM1 PE=1 SV=2	F	GO:0019899	enzyme binding
Q16610	ECM1_HUMANExtracellular matrix 1 OS=Homo sapiens OX=9606 GN=ECM1 PE=1 SV=2	F	GO:0043236	laminin binding
Q16610	ECM1_HUMANExtracellular matrix 1 OS=Homo sapiens OX=9606 GN=ECM1 PE=1 SV=2	P	GO:0001525	angiogenesis
Q16610	ECM1_HUMANExtracellular matrix 1 OS=Homo sapiens OX=9606 GN=ECM1 PE=1 SV=2	P	GO:0001938	positive regulation of endothelial cell proliferation
Q16610	ECM1_HUMANExtracellular matrix 1 OS=Homo sapiens OX=9606 GN=ECM1 PE=1 SV=2	P	GO:0001960	negative regulation of cytokine-mediated signaling pathway
Q16610	ECM1_HUMANExtracellular matrix 1 OS=Homo sapiens OX=9606 GN=ECM1 PE=1 SV=2	P	GO:0002063	chondrocyte development
Q16610	ECM1_HUMANExtracellular matrix 1 OS=Homo sapiens OX=9606 GN=ECM1 PE=1 SV=2	P	GO:0002576	platelet degranulation
Q16610	ECM1_HUMANExtracellular matrix 1 OS=Homo sapiens OX=9606 GN=ECM1 PE=1 SV=2	P	GO:0003416	endochondral bone growth
Q16610	ECM1_HUMANExtracellular matrix 1 OS=Homo sapiens OX=9606 GN=ECM1 PE=1 SV=2	P	GO:0006357	regulation of transcription by RNA polymerase II
Q16610	ECM1_HUMANExtracellular matrix 1 OS=Homo sapiens OX=9606 GN=ECM1 PE=1 SV=2	P	GO:0010466	negative regulation of peptidase activity
Q16610	ECM1_HUMANExtracellular matrix 1 OS=Homo sapiens OX=9606 GN=ECM1 PE=1 SV=2	P	GO:0030502	negative regulation of bone mineralization
Q16610	ECM1_HUMANExtracellular matrix 1 OS=Homo sapiens OX=9606 GN=ECM1 PE=1 SV=2	P	GO:2000404	regulation of T cell migration
Q16610	ECM1_HUMANExtracellular matrix 1 OS=Homo sapiens OX=9606 GN=ECM1 PE=1 SV=2	C	GO:0005893	interleukin-2 receptor complex
Q16610	ECM1_HUMANExtracellular matrix 1 OS=Homo sapiens OX=9606 GN=ECM1 PE=1 SV=2	P	GO:0006955	immune response
Q16610	ECM1_HUMANExtracellular matrix 1 OS=Homo sapiens OX=9606 GN=ECM1 PE=1 SV=2	C	GO:0005578	extracellular matrix
Q9NX40	OCAD1_HUMANOCIA domain-containing 1 OS=Homo sapiens OX=9606 GN=OCIAD1 PE=1 SV=1	C	GO:0005768	endosome
Q9NX40	OCAD1_HUMANOCIA domain-containing 1 OS=Homo sapiens OX=9606 GN=OCIAD1 PE=1 SV=1	F	GO:0005515	protein binding
Q9NX40	OCAD1_HUMANOCIA domain-containing 1 OS=Homo sapiens OX=9606 GN=OCIAD1 PE=1 SV=1	P	GO:2000736	regulation of stem cell differentiation
P07942	LAMB1_HUMANLaminin subunit beta-1 OS=Homo sapiens OX=9606 GN=LAMB1 PE=1 SV=2	C	GO:0005606	laminin-1 complex
P07942	LAMB1_HUMANLaminin subunit beta-1 OS=Homo sapiens OX=9606 GN=LAMB1 PE=1 SV=2	C	GO:0005608	laminin-3 complex
P07942	LAMB1_HUMANLaminin subunit beta-1 OS=Homo sapiens OX=9606 GN=LAMB1 PE=1 SV=2	C	GO:0043257	laminin-8 complex
P07942	LAMB1_HUMANLaminin subunit beta-1 OS=Homo sapiens OX=9606 GN=LAMB1 PE=1 SV=2	C	GO:0043260	laminin-11 complex
P07942	LAMB1_HUMANLaminin subunit beta-1 OS=Homo sapiens OX=9606 GN=LAMB1 PE=1 SV=2	C	GO:0045202	synapse
P07942	LAMB1_HUMANLaminin subunit beta-1 OS=Homo sapiens OX=9606 GN=LAMB1 PE=1 SV=2	F	GO:0005178	integrin binding
P07942	LAMB1_HUMANLaminin subunit beta-1 OS=Homo sapiens OX=9606 GN=LAMB1 PE=1 SV=2	F	GO:0005198	structural molecule activity
P07942	LAMB1_HUMANLaminin subunit beta-1 OS=Homo sapiens OX=9606 GN=LAMB1 PE=1 SV=2	P	GO:0007409	axonogenesis
P07942	LAMB1_HUMANLaminin subunit beta-1 OS=Homo sapiens OX=9606 GN=LAMB1 PE=1 SV=2	P	GO:0009887	animal organ morphogenesis
P07942	LAMB1_HUMANLaminin subunit beta-1 OS=Homo sapiens OX=9606 GN=LAMB1 PE=1 SV=2	P	GO:0030335	positive regulation of cell migration
P07942	LAMB1_HUMANLaminin subunit beta-1 OS=Homo sapiens OX=9606 GN=LAMB1 PE=1 SV=2	P	GO:0034446	substrate adhesion-dependent cell spreading
P07942	LAMB1_HUMANLaminin subunit beta-1 OS=Homo sapiens OX=9606 GN=LAMB1 PE=1 SV=2	P	GO:0044267	cellular protein metabolic process
P07942	LAMB1_HUMANLaminin subunit beta-1 OS=Homo sapiens OX=9606 GN=LAMB1 PE=1 SV=2	P	GO:0060429	epithelium development
P07942	LAMB1_HUMANLaminin subunit beta-1 OS=Homo sapiens OX=9606 GN=LAMB1 PE=1 SV=2	P	GO:0070831	basement membrane assembly
P07942	LAMB1_HUMANLaminin subunit beta-1 OS=Homo sapiens OX=9606 GN=LAMB1 PE=1 SV=2	P	GO:0007165	signal transduction
P07942	LAMB1_HUMANLaminin subunit beta-1 OS=Homo sapiens OX=9606 GN=LAMB1 PE=1 SV=2	C	GO:0008305	integrin complex
Q9Y2Y0	AR2BP_HUMANADP-ribosylation factor 2-binding OS=Homo sapiens OX=9606 GN=ARL2BP PE=1 SV=1	C	GO:0005634	nucleus
Q9Y2Y0	AR2BP_HUMANADP-ribosylation factor 2-binding OS=Homo sapiens OX=9606 GN=ARL2BP PE=1 SV=1	C	GO:0005758	mitochondrial intermembrane space
Q9Y2Y0	AR2BP_HUMANADP-ribosylation factor 2-binding OS=Homo sapiens OX=9606 GN=ARL2BP PE=1 SV=1	C	GO:0005759	mitochondrial matrix
Q9Y2Y0	AR2BP_HUMANADP-ribosylation factor 2-binding OS=Homo sapiens OX=9606 GN=ARL2BP PE=1 SV=1	C	GO:0005813	centrosome
Q9Y2Y0	AR2BP_HUMANADP-ribosylation factor 2-binding OS=Homo sapiens OX=9606 GN=ARL2BP PE=1 SV=1	C	GO:0005819	spindle
Q9Y2Y0	AR2BP_HUMANADP-ribosylation factor 2-binding OS=Homo sapiens OX=9606 GN=ARL2BP PE=1 SV=1	C	GO:0005829	cytosol
[truncated: 8,654 more rows]

## Sheet: BP
Level	GO ID	GO Name	GO Type	#Seqs	Sequence Names
1	GO:0008150	biological_process	P	396	Q01432,P42345,Q15334,P05362,P20339,O94952,Q8TBQ9,P61604,O43493,O00339,P15514,Q658P3,P80297,P07858,P16403,Q9GZM5,P09914,P43246,P02679,Q99942,Q1KMD3,Q01995,P15407,Q71U36,Q9Y282,Q8NAB2,Q14533,Q6P9B6,O75503,Q9NVZ3,Q00059,Q99523,P00749,Q96SW2,P02795,Q9Y2H6,Q96K49,Q96CD0,P10412,Q15847,Q9BWE0,Q9P0R6,Q9NVP1,O75976,Q8NBJ7,Q9Y6E2,P49761,Q96T88,P15509,Q9BXS4,Q9Y3B9,Q92766,Q96C36,Q01973,Q99584,Q9Y5K6,Q9BX40,…
2	GO:0050896	response to stimulus	P	210	Q9NUD5,P42025,P42345,O15075,O15347,P23634,P05362,P20339,P01584,Q9NR30,P61604,O00339,O95833,P15514,Q658P3,Q9BS40,P80297,P07858,P16403,P61218,P09914,P43246,P52566,P02679,Q9C002,Q99942,Q15165,Q1KMD3,Q01995,Q96PM5,P15407,Q71U36,Q01484,P09467,Q14533,Q6P9B6,O43169,P15531,P27701,Q9UBR2,Q9NXK6,Q99523,P50502,P00749,P52823,P07203,P02795,Q9Y2H6,P10412,P24821,Q15847,O95235,Q9BWE0,Q9NVP1,O60711,Q15758,Q99717,…
2	GO:0040007	growth	P	17	Q96T88,P42345,O15075,Q13308,P84022,P14635,Q9H0E2,P17813,P01584,P07203,O75093,Q16610,Q00688,P54852,P04818,Q58FF6,Q9NQY0
2	GO:0065007	biological regulation	P	327	Q01432,P42345,Q15334,P05362,P20339,P61604,O00339,P15514,Q658P3,P80297,P07858,P16403,P09914,P43246,P02679,Q99942,Q1KMD3,Q01995,P15407,Q71U36,Q8NAB2,Q14533,Q6P9B6,O75503,Q00059,Q99523,P00749,Q96SW2,P02795,Q9Y2H6,Q96CD0,P10412,Q15847,Q9BWE0,Q9P0R6,O75976,P49761,Q96T88,P15509,Q9BXS4,Q92766,Q96C36,Q01973,Q99584,Q9Y5K6,Q9BX40,Q96RF0,P80723,O75326,O95832,Q14116,Q8TED1,Q6ZXV5,P08183,Q13530,Q9NYM9,P22694,…
2	GO:0002376	immune system process	P	107	P30530,Q01432,P09601,P42025,P42345,O15075,Q9BZM4,O15347,P01889,P05362,P20339,P01584,Q9NR30,Q99880,O14933,P46734,P08648,P80297,P07858,Q03518,P43246,P02679,P84022,Q5VT79,Q71U36,P15407,Q9UBR5,Q14533,P17026,Q03519,P13747,P15531,Q8WUW1,Q9UBR2,P00749,Q13885,P55085,O14678,P02795,Q14807,P24821,O95235,Q92520,Q5JS37,P61769,Q14764,Q9P2C4,P28288,P48060,Q6PCE3,Q01628,P32456,Q9Y624,Q92820,Q58FF6,Q6L8Q7,P18085,…
2	GO:0051179	localization	P	180	Q01432,P42025,P42345,O15075,Q15334,P23634,O15347,P20339,P01584,Q9NR30,Q8TBQ9,O95833,Q658P3,P07858,P16403,P09914,P43246,P02679,Q9C002,Q99942,Q1KMD3,Q01995,O14832,Q71U36,Q9Y282,Q01484,O75503,Q9NVZ3,O43169,P15531,Q8N668,P27701,Q99523,P50502,P00749,Q96K49,P10412,P24821,O95235,Q9NQY0,Q5JS37,Q14764,Q9Y3R5,Q15758,O75976,Q9UJ83,Q9Y624,Q6JBY9,Q9UI15,Q6PL18,Q58FF6,P18085,P21926,Q07954,P30622,O15321,Q9BXS6,…
2	GO:0032501	multicellular organismal process	P	107	P30530,P09601,Q01432,P42025,P42345,O15075,Q71DI3,O15347,P23634,P05362,Q8N488,P20339,P01584,Q9UQN3,Q9UN76,P20290,P46734,O95833,P15514,P45973,P61218,Q6NXT6,P43246,P84022,P53350,P15407,Q8NAB2,Q01484,Q14533,O43169,Q8WUW1,Q9UBR2,Q99523,P52823,P55085,P07203,Q9Y2H6,P28347,Q8IVL1,Q92520,Q9BXT2,P61769,O95810,Q9Y3R5,Q13185,Q9P2C4,Q99717,Q9Y624,P68431,P09493,Q6JBY9,Q96LJ7,P18085,Q07954,O95716,P46821,Q16610,…
2	GO:0032502	developmental process	P	182	P42025,P42345,O15075,Q15334,P23634,P05362,O15347,P01584,O00339,O95833,P15514,P80297,P07858,P16403,Q9GZM5,P61218,P43246,Q01995,P15407,Q01484,Q14533,O75503,O43169,Q9UBR2,Q9NXK6,Q99523,P52823,P07203,P02795,Q9Y2H6,O14495,P10412,P24821,O95235,Q9NQY0,Q5JS37,Q9Y3R5,Q15758,O60711,O75976,Q99717,Q9Y624,P09493,Q9Y6E2,P49761,P49759,Q9UI15,Q6PL18,Q96HD1,Q58FF6,Q96T88,P18085,P21926,Q07954,Q01973,Q13753,P11908,…
2	GO:0022610	biological adhesion	P	35	P15531,P21926,P22694,O95297,P15151,P05362,P01584,P43121,Q01973,P07942,O14495,Q13753,Q13751,Q9Y2H6,Q99584,P02751,P17301,P20908,P24821,P08648,Q9Y5K6,Q9UBT7,P16422,Q13308,P08134,O60711,Q08722,P21589,O95832,Q9Y624,O75093,Q9UM22,P00533,Q58FF6,P29317
2	GO:0051704	multi-organism process	P	96	Q6L8Q7,P30530,Q6UWP2,P18085,P21926,O15075,P42345,Q9BZM4,O15347,P05362,P61009,Q9UNW9,P01889,P20339,Q9UQN3,P52926,O60675,Q9NR30,Q16611,Q99584,Q99880,P46934,P17301,O60870,O14933,O43278,P05386,Q6UWE0,Q2TB90,P05121,P45973,Q92599,P80297,P07858,P28062,P08134,Q03518,P09914,Q08722,P84022,Q9C002,Q99942,Q9Y6A9,Q6F5E8,O95832,Q14116,Q5VT79,P15407,Q6DN03,O43633,P04818,Q9BZM5,P29317,Q14533,P12235,Q03519,P04732,…
2	GO:0009987	cellular process	P	371	Q9NUD5,Q01432,P42025,P42345,O15075,Q15334,P23634,P05362,O15347,P20339,P01584,O94952,Q9NR30,Q8TBQ9,P61604,O43493,O00339,O95833,P15514,Q658P3,P80297,P07858,P16403,Q9GZM5,P61218,P09914,P43246,P02679,P52566,Q9C002,Q99942,Q15165,Q1KMD3,Q01995,Q96PM5,O14832,P15407,Q71U36,Q8IUE6,Q9Y324,Q8NAB2,Q01484,P09467,Q14533,Q6P9B6,O43169,Q9NVZ3,O75503,P15531,Q00059,Q8N668,Q9UBR2,Q9NXK6,Q99523,P50502,P00749,P52823,…
2	GO:0015976	carbon utilization	P	1	P09467
2	GO:0008283	cell population proliferation	P	16	Q9UBR5,Q03519,P23921,P27487,P22694,P02679,Q99717,Q9H0E2,P52823,P55085,Q9NRZ9,P07203,Q9GZL7,P52926,P15514,P08183
2	GO:0007610	behavior	P	18	P61769,P18085,P42345,O15075,Q13308,P22694,Q15758,O95832,P53350,P46821,Q9UN76,Q01973,P15407,O60675,P00533,Q8IVL1,P04049,P29317
2	GO:0040011	locomotion	P	47	P30530,P42345,O15075,Q07954,O15347,P05362,P23634,P46821,P01584,Q01973,P55160,Q9NR30,Q99584,P46934,O00339,P08648,P15514,Q9Y5K6,P16422,P08134,P27487,Q08722,P11234,Q6F5E8,Q9HBL7,P15407,P29317,Q9UBR5,Q8WUW1,P22694,O95297,Q9H939,P00749,P17813,Q13885,P07203,O14495,P24821,P54852,Q8IVL1,Q9ULH1,Q9NQY0,Q9Y624,O43657,P07477,O75093,P00533
2	GO:0048511	rhythmic process	P	9	P05121,P30530,O75093,O94808,Q13185,P46734,P00533,Q9BQG0,P04818
2	GO:0022414	reproductive process	P	67	P30530,Q6UWP2,Q96T88,P42025,P21926,Q71DI3,P23921,P42345,O15347,P23634,P05362,Q9NS25,O95716,P01584,Q01973,O60675,P26358,Q16611,Q9NR30,O14933,O43278,P49459,P15514,P46734,P45973,Q92599,Q9UKV8,P07858,P16403,P80723,P43246,P84022,Q9Y653,P53350,P15407,Q9NVM4,Q15067,P52943,P15531,P22694,Q9NXK6,Q13885,P52823,Q9Y2H6,O14495,P28347,Q9BXN6,P10412,P54852,P20248,Q13308,Q13185,P63146,P48060,P14635,Q99717,P78540,…
2	GO:0098754	detoxification	P	7	P07203,P80297,P04732,P02795,P62341,Q8TED1,P04179
2	GO:0023052	signaling	P	16	Q9BXT2,Q15758,O95297,Q9H0E2,Q9Y653,O95716,Q14116,Q9UN76,Q00688,P52926,P31947,P37235,O95166,Q9NZJ9,P15514,Q01484
2	GO:0008152	metabolic process	P	252	Q01432,P42345,O15075,O15347,P20339,P01584,O94952,Q9NR30,O43493,O00339,O95833,P15514,Q658P3,P07858,P16403,P61218,P09914,P43246,P02679,Q9C002,Q99942,Q15165,Q1KMD3,Q96PM5,O14832,P15407,Q9Y324,Q8NAB2,Q01484,P09467,O75503,O43169,P15531,Q00059,P27701,Q8N668,Q9UBR2,P50502,P00749,Q96SW2,P07203,Q9Y2H6,O14495,Q96CD0,P10412,O15116,P24821,Q9BWE0,Q9NVP1,Q5JS37,O75976,Q9UJ83,Q99717,Q8NBJ7,P49761,Q96LJ7,P49759,…
2	GO:0071840	cellular component organization or biogenesis	P	209	P42025,P42345,O15075,Q15334,O15347,P05362,P20339,O43493,O00339,P15514,Q658P3,P16403,P09914,P43246,P02679,Q99942,Q01995,O14832,P15407,Q71U36,Q8IUE6,Q01484,P09467,O43169,Q9NVZ3,Q00059,P15531,Q99523,P50502,P52823,P07203,Q9Y2H6,P10412,P24821,O95235,Q9NQY0,Q9Y3R5,O60711,Q15758,Q9UJ83,Q99717,Q9Y624,P09493,P49761,P49759,Q9UI15,Q6PL18,Q96HD1,Q58FF6,Q96T88,P18085,P21926,Q07954,P30622,Q01973,Q9BXS6,Q13753,…
2	GO:0110148	biomineralization	P	2	Q01628,Q9NVV0
2	GO:0001906	cell killing	P	7	Q14533,Q6DN03,Q99584,Q99880,Q13885,Q14116,Q9BZM5
2	GO:0098743	cell aggregation	P	1	P20908
3	GO:0035988	chondrocyte proliferation	P	2	P52926,P52823
3	GO:0051301	cell division	P	13	Q9BVP2,Q96FF9,P20248,Q71U36,P52926,Q9ULW0,P28347,A6NHL2,P11234,P14635,Q99986,Q13885,Q9NRZ9
3	GO:0007165	signal transduction	P	147	P30530,O60831,P09601,P42025,P42345,Q71DI3,O15075,Q9BZM4,O15347,P01889,P05362,P20339,P01584,P52926,Q9NR30,O14933,P46734,P08648,P15514,O95833,Q6UWE0,P80297,P07858,P61218,P09914,Q03518,Q6NXT6,P43246,P84022,P02679,P52566,P53350,Q96PM5,Q5VT79,Q6P9A2,P15407,Q01484,Q9UBR5,Q6P9B6,P13747,P15531,Q8WUW1,Q9NXK6,Q99523,P52823,Q13885,P55085,P02795,O14495,P28347,P63313,O94905,P24821,Q8IVL1,O95235,Q92520,Q9P0R6,…
3	GO:0007623	circadian rhythm	P	5	P05121,P00533,O94808,Q9BQG0,P04818
3	GO:0048646	anatomical structure formation involved in morphogenesis	P	23	P05121,P42025,O75326,P21926,P22694,P11234,P84022,Q07954,Q99717,Q9Y653,Q9Y624,Q14116,P17813,P07203,P43121,Q16610,Q9Y2G5,O60675,Q9Y2H6,Q9UII2,P00533,O43278,Q01484
3	GO:0007267	cell-cell signaling	P	11	Q9UN76,P52926,Q15758,O95297,Q14116,O95166,Q9H0E2,Q9NZJ9,Q9Y653,O95716,P15514
3	GO:0002252	immune effector process	P	56	Q6L8Q7,P30530,Q01432,P42025,P21926,O15075,Q07954,O15347,P01889,O95716,P20339,P55160,Q9NR30,Q99584,Q2TB90,P07858,Q08722,P11234,P02679,Q14116,Q5VT79,Q71U36,P15407,Q9BZM5,Q969E2,P13987,P13747,P15531,Q13530,Q8WUW1,Q7Z5G4,P00749,Q13885,P55085,P09382,P10619,P10321,P24821,P04049,Q5JS37,P61769,Q14764,P57764,P48060,Q92820,Q9H0E2,P04439,Q6PCE3,P32456,Q01628,P78540,P07477,Q9UIV1,P61916,P35237,Q58FF6
3	GO:0006457	protein folding	P	10	Q14697,Q96HE7,Q0VDF9,P61769,Q00688,Q99543,P50502,P61604,Q6PL18,Q58FF6
3	GO:0065008	regulation of biological quality	P	149	P30530,P09601,Q01432,P42025,Q5T1J5,Q71DI3,P42345,O15347,P05362,Q9UNW9,P23634,P01889,O00767,P20339,P01584,Q9UQN3,Q9UN76,P46734,O95833,Q658P3,P45973,P05121,Q14697,P07858,P80297,Q03518,Q6NXT6,P84022,Q99942,P53350,Q16698,Q5VT79,Q9UI42,Q12841,Q01484,O43169,O75503,P13747,P15531,Q8WUW1,Q8N668,Q03519,Q9UBR2,Q99523,P00749,Q96S97,Q9NRX4,P55085,P52823,O14678,P07203,P02795,O14495,P63313,P21695,Q92520,P61769,…
3	GO:0021700	developmental maturation	P	7	P30530,O75503,P14635,P04818,Q13885,O95716,P46821
3	GO:0051234	establishment of localization	P	166	Q01432,P42025,P42345,O15075,Q15334,P23634,O15347,P20339,Q9NR30,Q8TBQ9,O95833,Q658P3,P07858,P16403,P09914,P02679,Q9C002,Q99942,Q01995,O14832,Q71U36,Q9Y282,Q01484,O75503,Q9NVZ3,O43169,P15531,P27701,Q8N668,Q99523,P50502,P00749,Q96K49,P10412,P24821,O95235,Q9NQY0,Q5JS37,Q14764,Q9Y3R5,Q15758,Q9UJ83,Q9Y624,Q9UI15,Q6PL18,Q58FF6,P18085,P21926,Q07954,P30622,Q9BXS6,Q99584,Q9H2C0,P46934,Q2TB90,Q96RF0,P08134,…
3	GO:0016043	cellular component organization	P	205	P42025,P42345,O15075,Q15334,O15347,P05362,P20339,O43493,O00339,P15514,Q658P3,P16403,P09914,P43246,P02679,Q99942,Q01995,O14832,P15407,Q71U36,Q8IUE6,Q01484,P09467,O43169,Q9NVZ3,Q00059,P15531,Q99523,P50502,P52823,P07203,Q9Y2H6,P10412,P24821,O95235,Q9NQY0,Q9Y3R5,O60711,Q15758,Q9UJ83,Q99717,Q9Y624,P09493,P49761,P49759,Q9UI15,Q6PL18,Q96HD1,Q58FF6,Q96T88,P18085,P21926,Q07954,P30622,Q01973,Q9BXS6,Q13753,…
3	GO:0055114	oxidation-reduction process	P	39	Q6UWP2,P09601,O43169,P23921,O00483,O95479,P09104,Q96C36,O00767,Q9Y394,P07203,Q8NBM8,Q9Y2Z9,P49748,P11908,P21695,Q658P3,Q2TB90,Q96HE7,O00469,P62341,Q9C002,Q9UJ83,Q9BQG0,Q6PCE3,P43155,Q8NBJ7,Q16698,O14832,O94808,P53701,Q8TED1,Q96LJ7,P16219,Q9BV57,P04179,Q8IUF8,Q15067,P09467
3	GO:0007568	aging	P	11	O95832,P52926,P17813,P42345,Q16611,P11234,Q07954,P23634,P05362,P04818,Q9NZ45
3	GO:0042698	ovulation cycle	P	2	P30530,P00533
3	GO:0006118	obsolete electron transport	P	26	Q96HE7,P09601,O43169,P62341,O00483,Q9C002,Q9UJ83,O95479,Q9BQG0,P09104,Q6PCE3,P43155,P07203,Q16698,Q8NBJ7,O14832,Q2TB90,O94808,Q9Y2Z9,P49748,P11908,P16219,P21695,Q15067,Q658P3,P09467
3	GO:0007566	embryo implantation	P	3	P01584,P52823,P54852
3	GO:0051641	cellular localization	P	95	P42025,Q71DI3,O15075,P42345,Q15334,P61009,P20339,Q9UQN3,O75674,Q8TBQ9,Q6UWE0,P16403,P09914,Q03518,P43246,Q9Y6A9,Q99942,Q9Y5U9,P53350,Q1KMD3,O14832,Q5VT79,Q71U36,Q92522,Q01484,A6NHL2,O75503,Q03519,P27701,Q99523,P50502,Q96S97,Q13885,Q96K49,Q14807,P10412,Q8IVL1,O95235,Q9NQY0,P20248,Q9Y3R5,P28288,O75976,Q9UJ83,Q9Y4G8,Q9Y624,P32456,Q15629,P68431,Q9NP61,Q6JBY9,Q9Y3E7,Q6PL18,Q58FF6,P18085,P21926,Q07954,…
3	GO:0046034	ATP metabolic process	P	8	Q01432,Q0VDF9,P07311,Q5T1J5,P43246,P09104,Q6PCE3,Q2TB90
3	GO:0019882	antigen processing and presentation	P	23	Q03519,P42025,P13747,P18085,Q9UBR2,O14966,Q9BZM4,P01889,O95716,P20339,P10321,Q14807,Q13637,P08648,P07858,P28062,P61769,Q03518,Q9BZM5,P28288,P04439,P08183,O14678
3	GO:0003008	system process	P	52	P09601,P42025,P18085,P42345,O15075,Q07954,P23634,P05362,O95716,P46821,P01584,Q9UQN3,Q01973,Q9UN76,O60675,P46934,P46734,O95833,Q9Y5K6,P16422,O95832,P53350,P15407,Q8TED1,P37235,P04179,P52943,P29317,P22694,P55085,P07203,P43121,Q9Y2H6,Q13751,Q9UHN6,P35625,P20908,Q8IVL1,P54852,P04049,P61769,Q13308,Q9Y3R5,Q99717,Q9Y624,P78540,Q9NRZ9,O75093,P09493,Q6JBY9,P00533,P35237
3	GO:0044281	small molecule metabolic process	P	76	P30530,Q6UWP2,Q01432,P42345,O15075,P23921,Q07954,Q96C36,O00767,Q9Y394,P01584,P49748,Q9Y2G5,P11908,P26358,Q15147,P46734,Q2TB90,Q14697,Q96HE7,P08134,P62341,Q99986,Q15165,P53350,Q16698,O14832,P07311,O94808,Q8TED1,Q8NFF5,Q15067,P04818,P09467,Q9BRS2,P33316,O43169,P15531,Q13530,P22694,O00483,O95479,P17813,P09104,P07203,Q8NBM8,Q13057,Q8IYS1,Q9Y2Z9,Q9UHN6,P21695,Q92520,Q9Y617,P04049,O00469,P28562,P00918,…
3	GO:0007155	cell adhesion	P	31	P15531,P22694,O95297,P15151,P01584,P43121,Q01973,P07942,O14495,Q13753,Q13751,Q9Y2H6,Q99584,P02751,P17301,P20908,P24821,P08648,Q9Y5K6,Q9UBT7,P16422,Q13308,P08134,O60711,Q08722,P21589,O95832,Q9Y624,Q9UM22,P00533,P29317
3	GO:0030431	sleep	P	1	Q14116
3	GO:0051716	cellular response to stimulus	P	141	P30530,Q9NUD5,P09601,P42345,L0R6Q1,O14966,P23634,P05362,O15347,P01889,P20339,P01584,P52926,Q86W25,O60870,O14933,O00339,P46734,P45973,P80297,P07858,P16403,P61218,P09914,P43246,P02679,P84022,Q99942,P53350,Q1KMD3,Q01995,Q96PM5,P15407,Q5VT79,Q9UK22,Q71U36,Q01484,P09467,A6NHL2,O43169,P15531,P52823,P55085,P02795,Q14807,P10412,O94905,Q15847,P21695,Q9BWE0,Q9NVP1,P20248,P61769,O60711,Q13185,P28288,Q9Y4G8,…
3	GO:0048856	anatomical structure development	P	138	P30530,P09601,P42025,Q71DI3,O15075,P42345,O15347,P05362,Q8N488,Q9UN76,O00339,P20290,P08648,P46734,P15514,Q6UWE0,P07858,P16403,Q6NXT6,P43246,P84022,Q6PI78,P53350,Q01995,P15407,Q12841,Q01484,Q14533,O75503,O43169,Q8WUW1,Q9NXK6,Q99523,Q96S97,P52823,P55085,P07203,Q9Y2H6,O14495,P28347,Q14807,P10412,Q8IVL1,Q92520,Q9NQY0,P20248,Q5JS37,Q9Y3R5,Q15758,O60711,Q9P2C4,P28288,P48060,Q99717,Q9Y4G8,Q9Y624,Q01628,…
3	GO:0009791	post-embryonic development	P	5	Q9UKV8,P42345,Q6NXT6,P84022,O95716
3	GO:0007275	multicellular organism development	P	23	O00469,Q8WUW1,Q9Y3R5,Q99523,Q9P2C4,Q6NXT6,P43246,P84022,P14635,Q07954,Q8N488,Q9NRZ9,Q9NZ45,O75093,P15407,O60675,P09493,Q96K17,Q4G0X4,Q8WUQ7,P20290,Q92520,Q9BX40
3	GO:0001502	cartilage condensation	P	1	P20908
3	GO:0001503	ossification	P	5	Q6NXT6,Q99523,P00533,P20908,P52823
3	GO:0042221	response to chemical	P	142	P30530,Q9NUD5,P09601,P42025,P42345,O14966,P23634,P05362,P01889,O15347,O00767,P20339,P01584,Q9UN76,Q9NR30,Q86W25,P61604,O14933,P46734,P15514,Q658P3,P45973,P80297,P07858,P09914,P02679,P84022,Q99942,Q15165,P53350,P15407,Q5VT79,Q9UK22,Q71U36,Q01484,P09467,A6NHL2,Q6P9B6,Q03519,P13747,P15531,Q9UBR2,Q9NXK6,Q99523,P52823,P55085,P07203,P02795,O94905,P24821,Q15847,O95235,P21695,Q9BWE0,Q9NVP1,P20248,P61769,…
3	GO:0065009	regulation of molecular function	P	132	P30530,P09601,Q5T1J5,P42345,O15075,Q15334,O15347,P23634,P01889,P05362,P20339,P01584,P52926,O75674,Q86W25,P61604,O14933,P46734,O95833,Q6UWE0,P05121,Q9BS40,P07858,P16403,P09914,P43246,P52566,P84022,Q15165,P53350,Q5VT79,P15407,Q01484,Q03519,O75503,P13747,P15531,Q8N668,Q9UBR2,Q99523,P00749,Q9NRX4,P55085,Q96SW2,P07203,O14495,P63313,Q96CX2,Q9ULH1,P21695,Q9BWE0,Q9P0R6,P20248,P61769,Q14764,Q9Y4G8,Q99717,…
3	GO:0006804	obsolete peroxidase reaction	P	3	P07203,O95833,Q8TED1
3	GO:0072089	stem cell proliferation	P	2	Q03519,P08183
3	GO:0006955	immune response	P	29	Q9UBR5,Q14533,P30530,Q03519,P13747,Q13530,P21926,Q9UBR2,O15347,P05362,Q13885,Q16610,Q9NR30,Q99584,Q99880,P24821,Q92520,Q2TB90,P61769,Q03518,Q9P2C4,P57764,Q9H0E2,Q14116,P78540,Q71U36,Q6DN03,P52943,Q9BZM5
3	GO:0070085	glycosylation	P	9	Q11128,O00469,O75503,O94808,Q6P9A2,Q9Y2G5,Q5NDL2,Q6ZXV5,Q92520
3	GO:0044703	multi-organism reproductive process	P	8	Q6UWP2,P15407,O60675,Q16611,P28347,Q96LJ7,O14933,P78540
3	GO:0048609	multicellular organismal reproductive process	P	25	P30530,Q96T88,P42025,P42345,P22694,Q9NXK6,O15347,P23634,P26358,Q9NR30,P10412,O14933,P49459,P45973,Q92599,P20248,P16403,P84022,P63146,P14635,P07477,O75093,Q0VDF9,P00533,Q15067
3	GO:0032963	collagen metabolic process	P	5	P07477,P07858,O00469,P20908,Q15629
3	GO:0007611	learning or memory	P	13	Q01973,P61769,P15407,P18085,P42345,Q13308,O15075,P22694,P00533,O95832,P53350,P46821,P29317
3	GO:0006950	response to stress	P	125	P30530,P09601,P42345,L0R6Q1,O15347,P05362,P23634,P52926,Q9NR30,Q99880,O60870,P61604,O14933,O00339,P46734,O95833,P15514,P45973,P05121,Q9BS40,P16403,P61218,P43246,P84022,Q99942,Q15165,P53350,Q1KMD3,Q96PM5,P15407,Q9UK22,Q5VT79,Q12841,Q14533,O43169,P13747,P00749,P52823,P55085,Q13885,P07203,Q14807,P10412,O94905,P24821,Q92520,P20248,P61769,Q13185,O60711,Q99717,Q9Y624,Q01628,P32456,Q9BWH2,Q9NP61,P09493,…
3	GO:0035637	multicellular organismal signaling	P	5	Q9BXT2,Q00688,P31947,P37235,Q01484
3	GO:0051775	response to redox state	P	2	P52566,Q00688
3	GO:0016049	cell growth	P	7	O75093,Q00688,O15075,P54852,P17813,Q58FF6,Q9NQY0
3	GO:0009653	anatomical structure morphogenesis	P	60	P42345,O15075,Q15334,Q07954,O95716,Q01973,O60675,P55160,Q13753,Q16611,P26358,O00339,O43278,P08648,P15514,P46734,P05121,P08134,P11234,P84022,O95832,P52943,Q01484,P29317,P17026,O95786,Q9UBR2,P22694,O95297,P15151,P17813,P52823,P07942,Q9Y2H6,Q13751,P28347,P20908,P24821,O95235,Q9NQY0,P04049,O00469,Q13308,O60711,P00918,O75976,Q99717,Q01628,Q9NRZ9,P07477,O75093,Q00688,P53701,P09493,Q12846,P49759,P00533,…
3	GO:0019674	NAD metabolic process	P	5	P21589,P21695,P09104,Q6PCE3,Q2TB90
3	GO:0007154	cell communication	P	21	P30530,P09601,O43169,P42345,Q9UBR2,Q15758,O95297,P57764,P11234,Q9H0E2,P23634,Q9BQG0,Q9Y653,O95716,Q14116,Q9UN76,P15407,P52926,O95166,Q9NZJ9,P15514
3	GO:0009056	catabolic process	P	80	Q6L8Q7,P09601,Q01432,Q96T88,P42345,Q07954,O15347,Q9BRP8,O95716,P46821,O15321,O94952,Q9UQN3,Q5VVQ6,P49748,O75674,Q15147,Q9H2C0,P46934,Q13526,O14933,P54803,P05386,P49459,Q6UWE0,Q2TB90,P07858,P28062,Q99942,Q15165,P53350,Q16698,O14832,P07311,Q9UK22,P07305,Q9UI42,O43633,Q15067,O75503,P33316,P15531,Q9UBR2,P09104,Q96SW2,P07203,Q8NBM8,Q8IYS1,Q9GZL7,O14495,Q96CD0,Q9UHN6,O94905,Q96CX2,O15116,O95166,P21695,…
3	GO:0009566	fertilization	P	3	P07477,Q9Y2H6,P48060
3	GO:0044111	development involved in symbiotic interaction	P	1	P46934
3	GO:0050789	regulation of biological process	P	318	P42345,Q15334,P05362,P20339,P61604,O00339,P15514,Q658P3,P80297,P07858,P16403,P09914,P43246,P02679,Q99942,Q1KMD3,Q01995,P15407,Q71U36,Q8NAB2,Q14533,Q6P9B6,Q00059,Q99523,P00749,Q96SW2,P02795,Q9Y2H6,Q96CD0,P10412,Q15847,Q9BWE0,Q9P0R6,O75976,P49761,Q96T88,P15509,Q9BXS4,Q92766,Q96C36,Q01973,Q99584,Q9Y5K6,Q9BX40,Q96RF0,P80723,O75326,O95832,Q14116,Q8TED1,Q6ZXV5,P08183,Q13530,Q9NYM9,P22694,P17813,P09382,…
3	GO:0006807	nitrogen compound metabolic process	P	219	Q01432,P42345,O15075,O15347,P20339,P01584,O94952,Q9NR30,O43493,O00339,O95833,P15514,P07858,P16403,P61218,P09914,P43246,P02679,Q99942,Q15165,Q1KMD3,Q96PM5,P15407,Q9Y324,Q8NAB2,Q01484,O75503,O43169,P15531,Q00059,P27701,Q8N668,Q9UBR2,P50502,P00749,Q96SW2,P07203,Q9Y2H6,O14495,Q96CD0,P10412,O15116,P24821,Q9NVP1,Q5JS37,O75976,Q99717,Q8NBJ7,Q96LJ7,P49761,P49759,Q6PL18,Q58FF6,Q96T88,P15509,P18085,Q9Y3B9,…
3	GO:0032922	circadian regulation of gene expression	P	2	Q9BQG0,O94808
3	GO:0031424	keratinization	P	1	P31947
3	GO:0070661	leukocyte proliferation	P	2	P55085,Q9NRZ9
3	GO:0002262	myeloid cell homeostasis	P	4	P30530,Q01432,P09601,Q16611
3	GO:0014823	response to activity	P	1	P42345
3	GO:0035264	multicellular organism growth	P	1	P42345
3	GO:0007340	acrosome reaction	P	1	Q12846
3	GO:0060478	acrosomal vesicle exocytosis	P	1	O95716
3	GO:0031640	killing of cells of other organism	P	4	Q99880,Q14533,Q6DN03,Q99584
3	GO:0008219	cell death	P	16	Q14533,P42345,P27487,P57764,P11234,P07477,P01584,Q9Y421,O75093,P09382,Q9ULW0,Q16611,P49761,Q9Y3E7,P00533,P54852
3	GO:0051450	myoblast proliferation	P	1	P07203
3	GO:0050900	leukocyte migration	P	10	P01584,P16422,Q9UBR5,P42345,Q08722,O95297,Q99584,O15347,P05362,Q9Y624
3	GO:0014009	glial cell proliferation	P	1	P15514
3	GO:0051707	response to other organism	P	45	Q6L8Q7,Q14533,P30530,P04732,P13747,O95786,Q13530,O15075,P50502,O15347,Q13885,P55085,P07203,P52926,P02795,Q9NR30,Q16611,Q99584,Q99880,Q13637,P24821,Q92520,Q2TB90,P05121,P80297,P61769,Q08722,P57764,Q8NFP9,P84022,Q9C002,Q99942,Q99717,Q9H0E2,Q6F5E8,P32456,Q01628,Q14116,Q5VT79,P15407,Q6DN03,P61916,Q9UIV1,Q9BZM5,O14966
3	GO:0051321	meiotic cell cycle	P	3	Q9NR30,Q96RT7,Q13472
3	GO:0006928	movement of cell or subcellular component	P	47	P30530,P42025,P42345,O15075,P23634,P05362,O15347,P46821,P01584,Q01973,P55160,Q13753,Q9NR30,Q99584,O00339,P08648,Q9Y5K6,P16422,O75326,P08134,P27487,Q08722,Q6F5E8,P29317,Q9UBR5,Q8WUW1,P22694,O95297,Q9H939,P17813,Q13885,P07203,O14495,Q14807,P24821,P54852,Q8IVL1,Q9ULH1,O95235,Q9NQY0,Q9BQS8,Q9Y624,O43657,P07477,O75093,P09493,P00533
3	GO:0008340	determination of adult lifespan	P	1	P43246
3	GO:0043627	response to estrogen	P	3	P09601,Q96T88,P00918
3	GO:0007049	cell cycle	P	8	P30530,Q9Y421,P23921,Q9NR30,Q96RT7,Q13472,P30622,Q658P3
3	GO:0009628	response to abiotic stimulus	P	59	P09601,P42345,P23921,P23634,P05362,O95716,P46821,P01584,Q01973,P49748,Q16611,P46934,Q13526,O14933,P46734,P49459,Q2TB90,P45973,Q9BS40,P08134,P43246,P11234,P84022,O95832,P53350,Q01995,P15407,P37235,P52943,P00749,P17813,P52823,P07203,P31947,P20908,Q92844,Q15847,P04049,P20248,O00469,P28562,Q15758,Q13185,P00918,P63146,P14635,Q99717,Q9Y624,Q9BWH2,P49662,Q0VDF9,Q6JBY9,P49761,P49759,Q9UI15,P00533,Q6PL18,…
3	GO:0022602	ovulation cycle process	P	2	P46734,O75093
3	GO:0045321	leukocyte activation	P	54	P30530,Q01432,P42025,O15075,Q9BZM4,O15347,P01889,O95716,P20339,P55160,Q99584,Q2TB90,P80297,P07858,Q08722,P43246,P11234,P84022,Q14116,Q5VT79,P15407,Q9BZM5,P17026,Q969E2,P04732,P13987,P13747,P15531,Q7Z5G4,P00749,Q13885,P55085,P09382,P10619,P10321,P02795,Q13637,P24821,Q5JS37,P61769,Q14764,P57764,P48060,Q92820,Q9H0E2,P04439,Q6PCE3,P78540,Q9NRZ9,P07477,P61916,P35237,Q58FF6,O14966
3	GO:0002520	immune system development	P	1	P84022
3	GO:0035265	organ growth	P	2	P84022,Q16610
3	GO:0022412	cellular process involved in reproduction in multicellular organism	P	26	Q96T88,P21926,Q71DI3,P42345,Q9NXK6,Q13885,Q9NS25,Q9Y2H6,Q9NR30,O14495,Q9BXN6,P10412,P49459,P20248,Q9UKV8,P16403,P43246,P63146,P14635,Q99717,P53350,P68431,O75093,Q0VDF9,P15407,Q9NVM4
3	GO:0001775	cell activation	P	63	P30530,Q01432,P42025,O15075,Q9BZM4,Q07954,O15347,P01889,O95716,P20339,P01584,Q01973,P55160,Q15147,Q99584,Q2TB90,P80297,P07858,Q08722,P43246,P11234,P02679,P84022,Q14116,Q5VT79,P15407,Q9BZM5,P29317,P17026,Q969E2,P04732,P13987,P13747,P15531,Q7Z5G4,P00749,Q13885,P55085,P09382,P10619,P10321,P02795,Q13637,P24821,P04049,Q5JS37,P61769,Q14764,P57764,P48060,Q99717,Q9H0E2,P04439,Q92820,Q6PCE3,P78540,Q9NRZ9,…
3	GO:0060384	innervation	P	1	Q01973
3	GO:0019827	stem cell population maintenance	P	7	Q9BVP2,O75093,P61218,P84022,Q99717,P04049,P29317
3	GO:0009058	biosynthetic process	P	80	P30530,Q01432,P42345,O00767,P20339,P01584,Q9UN76,O60870,O14933,P20290,P61218,Q16698,Q96PM5,P15407,Q330K2,P09467,O43169,Q00059,P15531,Q9Y2Q9,P07203,O14495,P28347,Q96ST2,P21695,Q9BWE0,O95810,Q99543,P28288,Q6PCE3,Q15629,P43155,Q11128,Q13472,Q96LJ7,Q6PL18,Q9NZJ9,Q58FF6,Q6UWP2,Q96T88,P23921,Q96C36,Q9Y394,P11908,Q15147,P05386,Q2TB90,P62341,P62805,Q14116,P07311,O94808,Q96K17,Q8NFF5,P49643,Q15067,P04818,…
3	GO:0007059	chromosome segregation	P	2	Q9BRS2,P53350
3	GO:0019835	cytolysis	P	2	Q14533,P57764
3	GO:0007626	locomotory behavior	P	1	Q8IVL1
3	GO:0030534	adult behavior	P	1	O60675
3	GO:0048870	cell motility	P	38	P30530,P42345,O15075,P23634,P05362,O15347,P46821,P01584,Q01973,P55160,Q9NR30,Q99584,O00339,P08648,P16422,P08134,P27487,Q08722,Q6F5E8,P29317,Q9UBR5,Q8WUW1,P22694,O95297,Q9H939,P17813,Q13885,P07203,O14495,P54852,Q8IVL1,Q9ULH1,Q9NQY0,Q9Y624,O43657,P07477,O75093,P00533
3	GO:0007586	digestion	P	1	P07477
3	GO:0048589	developmental growth	P	12	P07203,O75093,Q16610,Q96T88,P42345,Q13308,O15075,P84022,P14635,P04818,Q58FF6,Q9NQY0
3	GO:0032259	methylation	P	11	Q96T88,P16403,Q13185,Q9UNQ2,O95716,P15407,P26358,Q9NVM4,P10412,P04818,P45973
3	GO:0019725	cellular homeostasis	P	38	P30530,P09601,O75503,P04732,P13747,P15531,P22694,Q07954,P23634,O15347,P05362,P52823,P55085,P01889,Q9Y281,P46821,P07203,Q9UQN3,P10321,P02795,O60675,Q15147,Q16611,Q9UHN6,P31947,Q13637,Q2TB90,Q96HE7,P80297,P62341,P00918,P84022,Q99717,P04439,P49643,P37235,P00533,O14966
3	GO:0009607	response to biotic stimulus	P	51	Q6L8Q7,P30530,O15075,O15347,P05362,P52926,Q9NR30,Q16611,Q99584,Q99880,Q86W25,Q2TB90,P05121,P80297,Q08722,P84022,Q9C002,Q99942,Q6F5E8,O95832,Q14116,Q5VT79,P15407,Q6DN03,Q9BZM5,Q14533,P04732,P13747,O95786,Q13530,P50502,Q13885,P55085,Q15434,P07203,P02795,Q13637,P24821,Q92520,P61769,P57764,Q8NFP9,Q99717,Q9H0E2,P32456,Q01628,P78540,P49662,P61916,Q9UIV1,O14966
3	GO:0009605	response to external stimulus	P	76	Q6L8Q7,P30530,P09601,P42345,O15075,O15347,P05362,P23634,P46821,P01584,P52926,Q9NR30,Q16611,Q99584,Q99880,Q86W25,P17301,P46734,Q2TB90,P05121,Q9BS40,P80297,Q08722,P11234,P84022,Q9C002,Q99942,Q6F5E8,Q15165,O95832,Q14116,Q01995,Q5VT79,P15407,Q6DN03,P37235,Q12841,P04818,Q9BZM5,Q14533,Q6P9B6,O43169,P04732,P13747,O95786,Q13530,P50502,P17813,Q13885,P55085,P52823,P07203,P02795,Q13637,P24821,P20908,O95166,…
3	GO:0061687	detoxification of inorganic compound	P	3	P80297,P04732,P02795
3	GO:0048869	cellular developmental process	P	104	P30530,P42025,Q71DI3,O15075,P42345,Q15334,P23634,P05362,P01584,P52926,O00339,P46734,O95833,P45973,P80297,P07858,P16403,Q9GZM5,Q6NXT6,P43246,P84022,P53350,Q01995,P15407,Q12841,Q01484,P17026,O75503,O43169,Q9NXK6,Q99523,Q96S97,Q13885,P55085,P52823,P07203,P02795,Q9Y2H6,P28347,P10412,P24821,Q8IVL1,Q9NQY0,P20248,P61769,O60711,Q9Y4G8,Q99717,Q9Y624,P68431,Q9Y6E2,P49761,P49759,Q9UI15,Q58FF6,Q96T88,P21926,…
3	GO:0044238	primary metabolic process	P	222	Q01432,P42345,O15075,O15347,P20339,O94952,Q9NR30,O43493,O00339,P15514,P07858,P16403,P61218,P09914,P43246,P02679,Q99942,Q15165,Q1KMD3,Q96PM5,O14832,P15407,Q9Y324,Q8NAB2,Q01484,P09467,O75503,O43169,P15531,Q00059,P27701,Q8N668,Q9UBR2,P50502,P00749,Q96SW2,P07203,Q9Y2H6,O14495,Q96CD0,P10412,O15116,P24821,Q9NVP1,Q5JS37,O75976,Q9UJ83,Q99717,Q8NBJ7,P49761,Q96LJ7,P49759,Q6PL18,Q58FF6,Q96T88,P15509,P18085,…
3	GO:0044237	cellular metabolic process	P	235	Q01432,P42345,O15075,O15347,P20339,P01584,O94952,Q9NR30,O43493,O00339,O95833,P15514,P16403,P61218,P09914,P43246,Q9C002,Q99942,Q15165,Q1KMD3,Q96PM5,O14832,P15407,Q9Y324,Q8NAB2,Q01484,P09467,O43169,O75503,P15531,Q00059,Q8N668,Q9UBR2,P50502,Q96SW2,P07203,Q9Y2H6,O14495,Q96CD0,P10412,O15116,P24821,Q9BWE0,Q9NVP1,Q5JS37,O75976,Q9UJ83,Q99717,Q8NBJ7,P49761,Q96LJ7,P49759,Q6PL18,Q58FF6,Q96T88,P15509,P18085,…
3	GO:0071704	organic substance metabolic process	P	235	Q01432,P42345,O15075,O15347,P20339,P01584,O94952,Q9NR30,O43493,O00339,O95833,P15514,P07858,P16403,P61218,P09914,P43246,P02679,Q99942,Q15165,Q1KMD3,Q96PM5,O14832,P15407,Q9Y324,Q8NAB2,Q01484,P09467,O75503,O43169,P15531,Q00059,P27701,Q8N668,Q9UBR2,P50502,P00749,Q96SW2,P07203,Q9Y2H6,O14495,Q96CD0,P10412,O15116,P24821,Q9BWE0,Q9NVP1,Q5JS37,O75976,Q9UJ83,Q99717,Q8NBJ7,P49761,Q96LJ7,P49759,Q6PL18,Q58FF6,…
3	GO:0000075	cell cycle checkpoint	P	6	Q9UK22,P52926,P42345,P43246,P11234,P53350
3	GO:0022402	cell cycle process	P	49	P30530,P42025,P18085,P42345,Q71DI3,Q15334,Q9UQN3,P52926,Q9BXS6,O14933,P46734,P49459,Q92599,Q9UKV8,Q96RF0,P08134,P27487,P43246,P11234,P84022,Q99986,P53350,Q5VT79,Q9ULW0,P49643,O43633,P04818,P08183,Q01484,Q96FF9,Q03519,Q13885,Q96CD0,Q14807,P31947,Q8IVL1,O95235,Q9NQY0,P20248,P28562,P63146,P14635,Q99717,P68431,Q9NRZ9,Q96RT7,Q13472,Q9UIV1,Q9Y3E7
3	GO:0051606	detection of stimulus	P	10	Q9BS40,P52926,P63146,P37235,P20908,P04439,P01889,P17813,P49459,Q2TB90
3	GO:0044419	interspecies interaction between organisms	P	53	P30530,P21926,Q9BZM4,P61009,P05362,Q9UNW9,P01889,P20339,Q9UQN3,P52926,Q99584,Q99880,P46934,P17301,O60870,P05386,Q6UWE0,P45973,Q92599,P07858,P28062,P08134,Q03518,P09914,P84022,Q9Y6A9,O95832,Q6DN03,O43633,P04818,Q9BZM5,P29317,Q14533,P12235,Q03519,O95786,P15151,P07203,Q13637,Q92844,P04049,P20248,P61769,Q9P2C4,P57764,Q99717,Q9Y624,Q15629,Q9Y3E7,P00533,Q6PL18,P35237,O14966
3	GO:0140352	export from cell	P	66	P30530,Q01432,P42025,Q15334,O15347,P01889,P23634,O95716,P20339,Q16610,O60675,P55160,Q99584,Q8TBQ9,Q658P3,Q2TB90,P05121,P07858,P62341,Q08722,P11234,P84022,Q01995,Q5VT79,Q71U36,Q01484,A6NHL2,Q9UBR5,Q969E2,P13987,P13747,P15531,Q7Z5G4,P00749,P17813,Q13885,P55085,Q9NVV0,Q8NBM8,P10619,P10321,P35625,P63313,P24821,Q92520,P04049,Q5JS37,P61769,Q14764,Q15758,P57764,P48060,Q92820,Q9H0E2,P04439,Q6PCE3,P32456,…
3	GO:0001816	cytokine production	P	4	P01584,Q9Y653,O15075,Q14116
3	GO:0002440	production of molecular mediator of immune response	P	1	O15075
3	GO:0007017	microtubule-based process	P	25	P42025,P18085,Q71DI3,O15075,Q15334,P30622,Q13885,P46821,Q9BXS6,Q14807,Q13526,O95166,Q8IVL1,O95235,P49459,P20248,Q9BQS8,P63146,P14635,P53350,P68431,Q71U36,Q9ULW0,Q96RT7,A6NHL2
3	GO:0031214	biomineral tissue development	P	2	Q01628,Q9NVV0
3	GO:0003006	developmental process involved in reproduction	P	38	P30530,Q96T88,Q71DI3,P23921,P42345,Q9NXK6,P22694,O15347,P05362,Q13885,Q9NS25,P52823,P01584,Q01973,Q9Y2H6,Q16611,Q9BXN6,P10412,O43278,P49459,P15514,P45973,P07858,P80723,P16403,Q13308,Q13185,P43246,P84022,P63146,P14635,Q99717,Q9Y653,P68431,Q9NRZ9,P15407,P00533,P52943
3	GO:0007389	pattern specification process	P	8	O75093,P80723,O60675,P84022,Q07954,Q99717,Q9Y653,P52823
3	GO:0033036	macromolecule localization	P	89	P30530,O60831,Q71DI3,P42345,P61009,P20339,Q9UQN3,O75674,Q8TBQ9,P20290,Q658P3,Q6UWE0,P16403,P09914,Q03518,P43246,P84022,Q9Y6A9,Q99942,P53350,Q1KMD3,O14832,Q92522,Q01484,Q03519,Q9NVZ3,Q8N668,P27701,Q99523,P50502,Q96S97,P55085,Q14807,P10412,Q8IVL1,O95235,Q9NQY0,Q14764,Q9Y3R5,O75976,Q9UJ83,Q9Y4G8,Q9Y624,P32456,Q15629,P68431,Q9Y6D6,Q9NP61,Q6JBY9,Q9Y3E7,Q6PL18,Q58FF6,P18085,P21926,Q07954,P30622,O95716,…
3	GO:0002253	activation of immune response	P	22	P30530,P42025,Q8WUW1,P42345,P22694,O15347,P05362,P55160,Q99584,P46934,O14933,Q92844,P24821,P46734,P49459,P04049,P07858,P28062,P11234,P02679,P63146,Q58FF6
3	GO:0072376	protein activation cascade	P	1	P02679
3	GO:0050673	epithelial cell proliferation	P	4	P02679,P15514,P27487,P22694
3	GO:0009719	response to endogenous stimulus	P	50	P30530,P42345,Q07954,P23634,P05362,O95716,P46821,P20339,Q01973,O14933,O43278,P15514,Q658P3,Q2TB90,P07858,P08134,P11234,O95832,Q5VT79,P15407,P04818,P29317,Q6P9B6,P15531,P22694,Q9NXK6,Q99523,P17813,P52823,P55085,Q9NVV0,P31947,P35625,P21695,P04049,Q9NVP1,P20248,O00469,P28562,Q13308,O60711,P00918,P14635,Q9Y4G8,P78540,P49662,O75093,P00533,Q92820,O14966
3	GO:0050879	multicellular organismal movement	P	2	P42345,P46821
3	GO:0007163	establishment or maintenance of cell polarity	P	9	Q9Y6D6,P18085,Q13308,P55160,P08134,P46821,Q6F5E8,Q58FF6,Q01484
3	GO:0140253	cell-cell fusion	P	1	P21926
3	GO:0006949	syncytium formation	P	1	P21926
3	GO:0044406	adhesion of symbiont to host	P	3	P05362,P21926,Q58FF6
3	GO:0022404	molting cycle process	P	2	Q14533,P00533
3	GO:0044764	multi-organism cellular process	P	1	Q14533
3	GO:1990748	cellular detoxification	P	4	P07203,P04179,P62341,Q8TED1
3	GO:0048871	multicellular organismal homeostasis	P	7	P07203,Q01432,O43169,P49748,P22694,P31947,O95832
3	GO:0048771	tissue remodeling	P	4	P30530,O15347,P55085,Q16611
3	GO:1903046	meiotic cell cycle process	P	9	P20248,Q9UKV8,P42345,P43246,P63146,P14635,P53350,Q13885,P49459
3	GO:0001909	leukocyte mediated cytotoxicity	P	3	Q13885,Q14116,Q9BZM5
3	GO:0022406	membrane docking	P	10	P42025,P22694,P05362,P53350,Q13885,O95716,Q71U36,Q12846,Q13637,A6NHL2
3	GO:0042445	hormone metabolic process	P	6	Q96HE7,Q16698,Q6UWP2,Q9UBR2,Q96LJ7,Q9Y394
3	GO:0042330	taxis	P	16	Q9UBR5,P42345,P11234,P00749,Q07954,O15347,P17813,Q9HBL7,P01584,O75093,Q01973,P15407,Q99584,P00533,P15514,P29317
3	GO:0051651	maintenance of location in cell	P	8	P18085,Q9Y2Y0,Q6NXT6,P11234,P63313,O15347,Q01484,Q2TB90
3	GO:0051235	maintenance of location	P	10	P18085,Q6NXT6,P11234,O15347,P01584,Q9Y2Y0,P31947,P63313,Q01484,Q2TB90
3	GO:0043500	muscle adaptation	P	2	P01584,P09601
3	GO:0061351	neural precursor cell proliferation	P	1	P23921
3	GO:0097242	amyloid-beta clearance	P	2	Q07954,P20339
3	GO:0006739	NADP metabolic process	P	4	P11908,O95479,Q6PCE3,P09467
3	GO:0006734	NADH metabolic process	P	4	P21695,P09104,Q6PCE3,Q2TB90
3	GO:0031294	lymphocyte costimulation	P	2	P08134,P09382
3	GO:0061919	process utilizing autophagic mechanism	P	10	Q8NFP9,Q9H0E2,O95716,Q9BWH2,O15321,Q9UQN3,Q5VVQ6,O95166,O43633,O14966
3	GO:0007272	ensheathment of neurons	P	1	P54803
3	GO:0050817	coagulation	P	8	P13987,O60675,Q71DI3,Q13185,P68431,O15347,P20339,P45973
3	GO:0097722	sperm motility	P	2	Q9NR30,P23634
3	GO:0045058	T cell selection	P	1	O75093
3	GO:0001763	morphogenesis of a branching structure	P	6	O75093,Q9UBR2,Q13308,O43278,P17813,P15514
3	GO:0098727	maintenance of cell number	P	7	Q9BVP2,O75093,P61218,P84022,Q99717,P04049,P29317
3	GO:0030029	actin filament-based process	P	14	P42025,P18085,Q13308,P08134,Q15334,P22694,Q9Y281,Q9Y624,P09493,P55160,Q9Y2H6,Q8IVL1,P54852,P52943
3	GO:0042440	pigment metabolic process	P	3	Q9UII2,P09601,P11908
3	GO:0071827	plasma lipoprotein particle organization	P	1	P22694
3	GO:0051821	dissemination or transmission of organism from other organism involved in symbiotic interaction	P	1	P46934
3	GO:1902579	multi-organism localization	P	3	Q13637,P09914,O14966
3	GO:0019748	secondary metabolic process	P	2	Q15165,P18085
3	GO:0002507	tolerance induction	P	1	P13747
3	GO:0001776	leukocyte homeostasis	P	2	P55160,Q16611
3	GO:0002339	B cell selection	P	1	Q16611
3	GO:0044085	cellular component biogenesis	P	6	P30622,Q99848,Q13530,Q8IUF8,Q9BQG0,P05386
3	GO:0007632	visual behavior	P	1	P42345
3	GO:0051703	intraspecies interaction between organisms	P	1	P42345
3	GO:0051705	multi-organism behavior	P	1	P42345
3	GO:0140029	exocytic process	P	3	Q13637,O95716,Q12846
3	GO:0016458	gene silencing	P	6	O95786,Q71DI3,Q9UIV1,O15347,Q9NRZ9,P68431
3	GO:0071684	organism emergence from protective structure	P	2	P63146,P49459
3	GO:0090220	chromosome localization to nuclear envelope involved in homologous chromosome segregation	P	2	P63146,P49459
3	GO:0070988	demethylation	P	5	Q96T88,P26358,P63146,Q8IUF8,P49459
3	GO:0034381	plasma lipoprotein particle clearance	P	2	P09601,P61916
3	GO:0045103	intermediate filament-based process	P	1	P04049
3	GO:0002200	somatic diversification of immune receptors	P	2	P43246,O15347
3	GO:0008037	cell recognition	P	4	Q11128,P00533,P24821,P29317
3	GO:0044706	multi-multicellular organism process	P	4	P78540,P15407,O60675,P28347
3	GO:0060033	anatomical structure regression	P	1	Q99717
3	GO:0033002	muscle cell proliferation	P	1	Q99717
3	GO:0090130	tissue migration	P	1	P42025
4	GO:0009617	response to bacterium	P	22	P05121,Q14533,P80297,P04732,P61769,P13747,Q08722,P57764,P50502,Q9C002,Q99942,O15347,P32456,P07203,Q5VT79,P02795,Q6DN03,Q99584,Q99880,Q13637,P24821,O14966
4	GO:0010273	detoxification of copper ion	P	3	P02795,P80297,P04732
4	GO:0003131	mesodermal-endodermal cell signaling	P	1	P52926
4	GO:0009615	response to virus	P	12	Q6L8Q7,O95786,Q13530,O15075,Q01628,P55085,P32456,P15407,P52926,Q9NR30,P61916,Q9UIV1
4	GO:0040008	regulation of growth	P	32	P30530,P04732,Q71DI3,P42345,P22694,Q07954,P09104,P46821,Q01973,P52926,P02795,Q16611,P31947,P46934,Q13526,P80297,P80723,O75326,Q13308,Q5TC84,P84022,P14635,Q99717,P68431,P07477,O75093,Q0VDF9,Q4G0X4,P00533,Q12841,Q53GA4,P09467
4	GO:0042769	DNA damage response, detection of DNA damage	P	3	P52926,P49459,P63146
4	GO:0097187	dentinogenesis	P	1	P05121
4	GO:0021766	hippocampus development	P	1	O15075
4	GO:0035556	intracellular signal transduction	P	62	P30530,O60831,P09601,P15509,P42345,O15075,Q92766,O15347,O95716,P20339,P01584,O60675,P55160,Q15147,Q16611,P46934,P46734,O95833,P49459,P15514,Q9UBT7,Q96HE7,P80297,P28062,P08134,P43246,P11234,P84022,Q9Y653,P53350,Q92688,Q14116,P37235,P52943,Q01484,P29317,Q6P9B6,P04732,P15531,Q8WUW1,P22694,Q9NVV0,P02795,P28347,P31947,Q13637,Q9P0R6,P20248,P63146,P14635,Q9Y4G8,Q9H0E2,Q99717,Q9BQG0,P49662,Q9UIV1,P49759,…
4	GO:0060041	retina development in camera-type eye	P	4	P37235,O15075,P23921,Q9NRZ9
4	GO:0030282	bone mineralization	P	2	Q01628,Q9NVV0
4	GO:0051607	defense response to virus	P	7	Q6L8Q7,Q13530,Q9NR30,Q9UIV1,Q01628,P55085,P32456
4	GO:0071461	cellular response to redox state	P	1	P52566
4	GO:0061337	cardiac conduction	P	4	P37235,Q9BXT2,Q01484,P31947
4	GO:0021675	nerve development	P	5	Q01973,O75326,P00533,Q8IVL1,Q9NRZ9
4	GO:0021988	olfactory lobe development	P	1	O75326
4	GO:0001525	angiogenesis	P	9	P07203,Q16610,P43121,P17813,P22694,Q9UII2,P00533,Q9Y653,Q14116
4	GO:0007166	cell surface receptor signaling pathway	P	81	P30530,P09601,P42025,P15509,P18085,P42345,Q71DI3,O15347,P05362,P01889,P01584,Q01973,P55160,Q15147,Q9NR30,Q16611,P46934,P17301,Q13526,P46734,P08648,P49459,Q6UWE0,Q9Y5K6,Q9UKV8,P80297,P28062,O75326,P61218,P09914,P08134,Q08722,P11234,P52566,P84022,Q9Y653,O95832,Q14116,P15407,P04179,P29317,P13987,P04732,P13747,P15531,Q8WUW1,Q99523,O95297,P22694,Q9GZL7,Q99933,P10321,P02795,O14495,P63313,P24821,O95166,…
4	GO:0010573	vascular endothelial growth factor production	P	1	Q9Y653
4	GO:0021819	layer formation in cerebral cortex	P	1	Q9Y653
4	GO:0030168	platelet activation	P	4	P30530,P02679,P55085,P04049
4	GO:0072378	blood coagulation, fibrin clot formation	P	1	P02679
4	GO:0007613	memory	P	5	O15075,P42345,P53350,P22694,P46821
4	GO:0009612	response to mechanical stimulus	P	14	P14635,P17813,Q9Y624,Q01995,P46821,P49662,P01584,P15407,Q16611,Q9UI15,P20908,P00533,P46734,P04049
4	GO:0010035	response to inorganic substance	P	37	P30530,P09601,P04732,P13747,P23634,P05362,P01889,P46821,P07203,P10321,P02795,Q16611,Q99584,P46934,O95166,P15514,P04049,P20248,P80297,P61769,P28562,P00918,P02679,P14635,P04439,Q15165,O95832,P78540,P15407,Q5VT79,P37235,P00533,Q6PL18,Q92820,P52943,Q01484,P09467
4	GO:0016358	dendrite development	P	3	O00339,Q13753,P46821
4	GO:0042493	response to drug	P	44	P30530,P09601,Q03519,P04732,P15531,P42345,P22694,P23634,P05362,P17813,P09104,Q9NVV0,P46821,P01584,P07203,Q01973,P02795,P55160,Q16611,P24821,Q15847,P46734,P49459,P15514,P04049,P20248,P80297,P61769,P28562,P11234,P28288,P63146,P14635,Q92820,O95832,P78540,O75093,P15407,P37235,P00533,P04818,Q58FF6,P08183,P09467
4	GO:0070050	neuron cellular homeostasis	P	4	P37235,Q9UQN3,P23634,P46821
4	GO:0019538	protein metabolic process	P	135	P30530,P42345,Q71DI3,Q8N488,P61009,P01889,P20339,O94952,Q9Y2G5,P52926,O75674,Q99880,O14933,O43493,O00339,P46734,P15514,Q6UWE0,P45973,Q14697,P07858,P16403,P09914,P02679,P84022,Q9Y6A9,Q99942,P53350,Q96PM5,Q6P9A2,Q9UK22,Q9UI42,Q12841,Q8NAB2,Q01484,O75503,P13747,P15531,P27701,Q8N668,Q9UBR2,P50502,P00749,Q9NRX4,Q96SW2,P07203,Q9Y2H6,O14495,Q96CD0,P10412,Q96CX2,O94905,P24821,Q7Z7A3,Q92520,P20248,Q5JS37,…
4	GO:0000768	syncytium formation by plasma membrane fusion	P	1	P21926
4	GO:0007342	fusion of sperm to egg plasma membrane involved in single fertilization	P	1	P21926
4	GO:0009888	tissue development	P	33	P21926,Q07954,Q9Y281,P17813,P52823,Q9NVV0,P07203,P07942,Q13753,Q13751,P28347,Q9H2C0,P46934,P20908,P46734,Q6UXH1,P16422,P20248,P07858,P80723,Q13308,P84022,P14635,Q99717,Q01628,P78540,P49662,O75093,P15407,Q12846,P00533,Q96HD1,P52943
4	GO:0031647	regulation of protein stability	P	16	Q92599,P21926,Q7Z5G4,P84022,P63146,Q99942,P53350,Q0VDF9,P10619,O14495,P46934,Q13526,P49459,Q58FF6,Q01484,P29317
4	GO:0023051	regulation of signaling	P	141	P30530,Q9NUD5,O60831,P09601,Q5T1J5,P42345,Q15334,O15347,P05362,P01889,P23634,P20339,P01584,O75674,Q9NR30,Q86W25,O14933,P46734,O95833,P15514,Q6UWE0,P05121,P09914,P52566,P02679,P84022,Q6PI78,P53350,Q5VT79,P15407,Q12841,Q01484,P09467,P13747,Q99523,P00749,Q96S97,Q9NRX4,P55085,P07203,O14495,Q96CX2,P63313,P24821,Q8IVL1,P21695,Q92520,Q9P0R6,Q14764,O95810,O60711,Q9P2C4,Q9Y4G8,Q99717,Q9Y624,P32456,Q9Y6D6,…
4	GO:0001942	hair follicle development	P	2	Q14533,P00533
4	GO:0035878	nail development	P	1	Q14533
4	GO:0008354	germ cell migration	P	1	O14495
4	GO:0048731	system development	P	36	P30530,Q6UWP2,O95786,Q9NXK6,O95297,Q9H939,P43121,Q01973,Q9GZL7,O14495,P11908,P28347,Q14807,P54852,P08648,Q6UWE0,Q96RF0,Q5JS37,O75326,Q13308,Q6NXT6,Q15758,P84022,Q9Y4G8,Q99717,Q9Y624,Q92688,Q01995,Q9NRZ9,P07477,Q11128,P49662,Q9Y6E2,Q9UI15,P00533,P29317
4	GO:0001666	response to hypoxia	P	18	P20248,O00469,P09601,P42345,Q13185,P84022,P00749,P14635,Q99717,P05362,P17813,O95832,P52823,Q9BWH2,Q2TB90,Q13526,P04049,P45973
4	GO:0003151	outflow tract morphogenesis	P	1	O95832
4	GO:0007612	learning	P	5	P15407,P18085,O95832,P42345,P46821
4	GO:0060021	roof of mouth development	P	4	P84022,O95832,Q92688,Q9NRZ9
4	GO:0060325	face morphogenesis	P	1	O95832
4	GO:0090559	regulation of membrane permeability	P	9	Q0VDF9,Q5T1J5,P42345,Q16611,P31947,Q9UII2,O95832,Q9Y624,Q2TB90
4	GO:0000278	mitotic cell cycle	P	4	P30530,P30622,P23921,Q96RT7
4	GO:0001974	blood vessel remodeling	P	2	P30530,Q16611
4	GO:0007050	cell cycle arrest	P	9	P30530,P42345,P28562,P27487,P43246,P11234,P84022,Q99717,P46734
4	GO:0031668	cellular response to extracellular stimulus	P	10	P30530,P09601,O43169,P15407,P42345,P57764,P11234,O95166,P23634,Q9BQG0
4	GO:0032940	secretion by cell	P	65	P30530,Q01432,P42025,Q15334,O15347,P01889,O95716,P20339,Q16610,O60675,P55160,Q99584,Q8TBQ9,Q658P3,Q2TB90,P05121,P07858,P62341,Q08722,P11234,P84022,Q01995,Q5VT79,Q71U36,Q01484,A6NHL2,Q9UBR5,Q969E2,P13987,P13747,P15531,Q7Z5G4,P00749,P17813,Q13885,P55085,Q9NVV0,Q8NBM8,P10619,P10321,P35625,P63313,P24821,Q92520,P04049,Q5JS37,P61769,Q14764,Q15758,P57764,P48060,Q92820,Q9H0E2,P04439,Q6PCE3,P32456,P43155,…
4	GO:0034101	erythrocyte homeostasis	P	3	P30530,Q01432,P09601
4	GO:0045087	innate immune response	P	12	P30530,Q13530,Q6DN03,Q9NR30,P57764,Q99880,P24821,Q9H0E2,Q13885,Q14116,Q9BZM5,Q2TB90
4	GO:0045184	establishment of protein localization	P	67	P30530,O60831,P18085,Q07954,P61009,P30622,O95716,P46821,P20339,Q9UQN3,O60675,O75674,Q99584,Q8TBQ9,P46934,P20290,P49459,Q658P3,Q6UWE0,Q96RF0,P16403,P08134,Q03518,P62341,P09914,P84022,Q9Y6A9,Q99942,O14832,Q96K17,P07305,Q92522,O43633,Q15067,Q01484,Q03519,Q9NVZ3,Q8N668,Q9NYM9,Q7Z5G4,Q99523,P50502,P55085,P10619,Q14807,P31947,Q13637,P10412,O95166,O95235,P04049,Q14764,Q9Y3R5,P63146,Q9UJ83,Q15005,P32456,…
4	GO:0048469	cell maturation	P	5	P30530,P14635,O75503,P04818,Q13885
4	GO:0097350	neutrophil clearance	P	2	P30530,O15347
4	GO:0001556	oocyte maturation	P	2	Q13885,P14635
4	GO:0007056	spindle assembly involved in female meiosis	P	1	Q13885
4	GO:0042267	natural killer cell mediated cytotoxicity	P	3	Q13885,Q14116,Q9BZM5
4	GO:0022417	protein maturation by protein folding	P	1	Q96HE7
4	GO:0034975	protein folding in endoplasmic reticulum	P	1	Q96HE7
4	GO:0045454	cell redox homeostasis	P	3	P07203,Q96HE7,P62341
4	GO:0009725	response to hormone	P	36	Q6P9B6,P15531,P42345,P04818,Q9NXK6,P22694,Q99523,P23634,P05362,P17813,O95716,P52823,P46821,P20339,P31947,P35625,O14933,P15514,Q658P3,Q2TB90,P04049,Q9NVP1,P20248,P07858,O00469,P28562,P08134,P00918,P14635,O95832,P78540,O75093,Q5VT79,P15407,P00533,Q92820
4	GO:0006935	chemotaxis	P	16	Q9UBR5,P42345,P11234,P00749,Q07954,O15347,P17813,Q9HBL7,P01584,O75093,Q01973,P15407,Q99584,P00533,P15514,P29317
4	GO:0007093	mitotic cell cycle checkpoint	P	5	P11234,P42345,P53350,P43246,P52926
4	GO:0009887	animal organ morphogenesis	P	31	P17026,P42345,P22694,Q01973,P07942,O60675,Q9Y2H6,Q13753,Q13751,Q16611,P26358,P20908,P24821,O00339,O43278,P04049,P05121,Q13308,P00918,P11234,P84022,Q99717,Q01628,Q9NRZ9,Q00688,P53701,Q12846,P49759,P00533,Q53GA4,P29317
4	GO:0032507	maintenance of protein location in cell	P	8	P18085,Q9Y2Y0,Q6NXT6,P11234,P63313,O15347,Q01484,Q2TB90
4	GO:0042592	homeostatic process	P	61	P30530,Q01432,P09601,Q71DI3,Q07954,P23634,O15347,P05362,P01889,Q9Y281,O95716,P46821,Q9UQN3,P49748,O60675,P55160,Q15147,Q16611,P46934,Q658P3,Q2TB90,Q96HE7,P80297,P62341,P11234,P84022,O95832,Q14116,P49643,P37235,P04179,Q15067,Q6ZXV5,Q9BZM5,Q01484,O43169,P04732,O75503,P15531,P13747,Q8N668,P22694,P52823,P55085,P07203,P10321,P02795,P31947,Q9UHN6,Q13637,P21695,Q92520,P61769,P00918,Q99717,P04439,P68431,…
4	GO:0061024	membrane organization	P	41	O43169,Q9NVZ3,P18085,Q03519,Q5T1J5,P21926,Q9NYM9,Q9H939,P30622,Q96S97,O95716,P20339,Q9UQN3,O75674,Q16611,P31947,Q13637,Q9UII2,O43493,O95235,Q5K651,Q9NQY0,Q2TB90,Q8IVF2,Q96RF0,O95810,P08134,Q03518,P11234,P28288,P14635,Q99986,P53350,Q0VDF9,Q12846,Q9Y3E7,P37235,O43633,P08183,Q01484,O14678
4	GO:0098696	regulation of neurotransmitter receptor localization to postsynaptic specialization membrane	P	2	P11234,Q9Y6D6
4	GO:0014805	smooth muscle adaptation	P	2	P01584,P09601
4	GO:0035234	ectopic germ cell programmed cell death	P	1	P01584
4	GO:0021846	cell proliferation in forebrain	P	1	P23921
4	GO:0008104	protein localization	P	89	P30530,O60831,Q71DI3,P42345,P61009,P20339,Q9UQN3,O75674,Q8TBQ9,P20290,Q658P3,Q6UWE0,P16403,P09914,Q03518,P43246,P84022,Q9Y6A9,Q99942,P53350,Q1KMD3,O14832,Q92522,Q01484,Q03519,Q9NVZ3,Q8N668,P27701,Q99523,P50502,Q96S97,P55085,Q14807,P10412,Q8IVL1,O95235,Q9NQY0,Q14764,Q9Y3R5,O75976,Q9UJ83,Q9Y4G8,Q9Y624,P32456,Q15629,P68431,Q9Y6D6,Q9NP61,Q6JBY9,Q9Y3E7,Q6PL18,Q58FF6,P18085,P21926,Q07954,P30622,O95716,…
4	GO:0097009	energy homeostasis	P	1	Q01432
4	GO:0017144	drug metabolic process	P	21	Q6UWP2,Q01432,Q15067,P28288,P21589,P09104,Q96C36,O14678,P78540,P07203,Q16698,P07477,Q8IYS1,P07311,Q96LJ7,Q8NFF5,Q9BV57,P00533,P04818,Q9Y617,Q2TB90
[truncated: 5,563 more rows]

## Sheet: MF
Level	GO ID	GO Name	GO Type	#Seqs	Sequence Names
[truncated: 1,158 more rows]

## Sheet: CC
Level	GO ID	GO Name	GO Type	#Seqs	Sequence Names
[truncated: 789 more rows]

## Sheet: enrichment
GO-ID	Term	Category	FDR	P-Value	#Diff	Over/Under	TestSeqs
[truncated: 4,375 more rows]
